# Supplementary material for: Pooled CRISPRi screening reveals fungal-specific vulnerabilities across environments and genetic backgrounds
Source: Research Square preprint supplement (doi:10.21203/rs.3.rs-8554844/v1), 2026-01-13
Supplement: Supplementary file 1 [file 391222c14ff9c345c469a133.xlsx]

## Sheet: Contents
Supplementary tables for Wensing, Després et al, 2025.
Table S1	Functional annotations of the 130 fungal specific essential genes targeted in the CRISPRi strain library
Table S2	Strains used in this study
Table S3	Plasmids used in this study
Table S4	Oligonucleotides used in this study
Table S5	Media recipes
Table S6	Counts and Log2FC values for the timecourse assay
Table S7	Counts and Log2FC values for the environmental assay
Table S8	Counts and Log2FC values for the clnical isolates assay

## Sheet: Table S1
Systematic Name	Alias	Description	Molecular function	Feature type
C1_00220W_A	PHR2	Glycosidase; role in vaginal not systemic infection (low pH not neutral); low pH, high iron, fluconazole, Hap43-induced; Rim101-repressed at pH8; rat catheter biofilm induced; Bcr1-repressed in RPMI a/a biofilms	1,3-beta-glucanosyltransferase activity (ISA with A. nidulans: ASPL0000103358), glucanosyltransferase activity (IDA), hydrolase activity, hydrolyzing O-glycosyl compounds (ISS), 1,3-beta-glucanosyltransferase activity (IEA with S. cerevisiae: GAS1, S. pombe: SPAC19B12.02c)	ORF, Verified
C1_00400W_A	SVF1	Putative survival factor; stationary phase enriched protein; fluconazole-induced; regulated by Gcn4p; repressed in response to amino acid starvation (3-AT treatment); fungal-specific (no human or murine homolog)	ceramide binding (IEA with S. cerevisiae: SVF1)	ORF, Uncharacterized
C1_00450C_A	N/A	Mitochondrial protein; component of the mitochondrial inner membrane organizing system ; role in maintenance of crista junctions and inner membrane architecture; Spider biofilm repressed	Unknown	ORF, Uncharacterized
C1_00510W_A	ECM31	Ortholog(s) have 3-methyl-2-oxobutanoate hydroxymethyltransferase activity, role in pantothenate biosynthetic process and mitochondrion localization	3-methyl-2-oxobutanoate hydroxymethyltransferase activity (IEA with A. nidulans: pantoB, S. cerevisiae: ECM31), catalytic activity (IEA with EBI: Pyruvate/Phosphoenolpyruvate kinase-like domain superfamily)	ORF, Uncharacterized
C1_01070C_A	KRP1	Essential protein that localizes to the kinetochore; involved in regulation of cell cycle progression; likely associated with the MIND kinetochore subcomplex and/or the DASH/Dam1 complex (1)	unknown	ORF, Verified
C1_01600W_A	MRP20	Component of mitochondrial ribosome; decreased expression in hyphae compared to yeast-form cells	structural constituent of ribosome (IEA with S. cerevisiae: MRP20)	ORF, Uncharacterized
C1_01950C_A	N/A	Ortholog(s) have role in vacuolar protein processing	unknown	ORF, Uncharacterized
C1_02420C_A	GSC1 (FKS1)	Essential beta-1,3-glucan synthase subunit; gsc1 allele determines resistance/sensitivity to echinocandins; 16 predicted membrane-spanning regions; mRNA abundance declines after yeast-to-hypha transition; Spider biofilm induced	1,3-beta-D-glucan synthase activity (IMP, ISS, IDA), 1,3-beta-D-glucan synthase activity (IEA with S. cerevisiae: GSC2, S. pombe: SPCC1840.02c, A. nidulans: fksA)	ORF, Verified
C1_02510W_A	BOS1	Putative v-SNARE of the endoplasmic reticulum membrane; possibly an essential gene, disruptants not obtained by UAU1 method	SNAP receptor activity (IEA with S. cerevisiae: BOS1)	ORF, Uncharacterized
C1_02620C_A	HOM6	Putative homoserine dehydrogenase; Gcn4-regulated; induced by amino acid starvation (3-ATtreatment); macrophage-induced protein; protein level decreases in stationary phase cultures; flow model biofilm repressed	NADP binding (IEA with EBI: IPR005106), homoserine dehydrogenase activity (IEA with S. cerevisiae: HOM6), aspartate kinase activity (IEA with EBI: Bifunctional aspartokinase/homoserine dehydrogenase-like), homoserine dehydrogenase activity (IEA with S. cerevisiae: HOM6), oxidoreductase activity (IEA with EBI: Aspartate/homoserine dehydrogenase, NAD-binding)	ORF, Verified
C1_02660C_A	MGM101	Putative mitochondrial genome maintenance protein; fungal-specific (no human or murine homolog); mutation confers hypersensitivity to tubercidin (7-deazaadenosine)	single-stranded DNA binding (IEA with S. cerevisiae: MGM101)	ORF, Verified
C1_02960C_A	MDM31	Ortholog(s) have role in intracellular monoatomic ion homeostasis, mitochondrion inheritance, mitochondrion organization, regulation of cardiolipin metabolic process and mitochondrial inner membrane, mitochondrion localization	unknown	ORF, Uncharacterized
C1_03280W_A	RSM24	Ortholog(s) have structural constituent of ribosome activity and mitochondrial small ribosomal subunit localization	structural constituent of ribosome (IEA with S. cerevisiae: RSM24)	ORF, Uncharacterized
C1_03380W_A	TPS2	Trehalose-6-phosphate (Tre6P) phosphatase; mutant heat sensitive, accumulates Tre6P, decreased mouse virulence; possible drug target; 2 conserved phospohydrolase motifs; no mammalian homolog; Hap43-repressed; flow model biofilm induced	trehalose-phosphatase activity (IMP), trehalose-phosphatase activity (IEA with S. cerevisiae: TPS2, S. pombe: SPAC19G12.15c)	ORF, Verified
C1_03980W_A	SPC19	Essential subunit of the Dam1 (DASH) complex, which acts in chromosome segregation by coupling kinetochores to spindle microtubules	contributes to microtubule binding (ISA with S. cerevisiae: SPC19), contributes to microtubule binding (IEA with S. cerevisiae: SPC19), contributes_to microtubule plus-end binding (IEA with S. cerevisiae: SPC19)	ORF, Verified
C1_05500W_A	RSM22	Predicted mitochondrial small ribosomal subunit; rat catheter and Spider biofilm induced	methyltransferase activity (IEA with EBI: Ribosomal protein Rsm22-like), structural constituent of ribosome (IEA with EBI: IPR015324), structural constituent of ribosome (IEA with S. cerevisiae: RSM22)	ORF, Uncharacterized
C1_05560W_A	RIB4	Lumazine synthase (6,7-dimethyl-8-ribityllumazine synthase, DMRL synthase); catalyzes the penultimate step in the synthesis of riboflavin; Hap43-induced; rat catheter and Spider biofilm repressed	6,7-dimethyl-8-ribityllumazine synthase activity (IDA), 6,7-dimethyl-8-ribityllumazine synthase activity (IEA with S. cerevisiae: RIB4, S. pombe: SPBC409.13), riboflavin binding (IEA with S. pombe: SPBC409.13)	ORF, Verified
C1_05780W_A	RSC9	Component of the RSC chromatin remodeling complex; decreased transcription is observed upon fluphenazine treatment or in an azole-resistant strain that overexpresses CDR1 and CDR2	DNA binding (IEA with S. cerevisiae: RSC9)	ORF, Verified
C1_06230C_A	MDM34	Putative zinc finger transcription factor; macrophage-downregulated; flow model biofilm induced; flow model and Spider biofilm induced	DNA-binding transcription factor activity (ISS)	ORF, Uncharacterized
C1_06850W_A	PCL7	Putative cyclin-like protein; possible Pho85 cyclin; hyphal repressed; induced by Mnl1 under weak acid stress	protein kinase binding (IEA with EBI: Cyclin PHO80-like)	ORF, Uncharacterized
C1_07240W_A	YPD1	Phosphohistidine intermediate protein in a phosphorelay signal transduction pathway; residue His69 is the phosphoacceptor histidine; predicted to be soluble and cytosolic; functional homolog of S. cerevisiae Ypd1p	transferase activity, transferring phosphorus-containing groups (IGI with S. cerevisiae: YPD1), histidine phosphotransfer kinase activity (IEA with EBI: Histidine-containing phosphotransfer protein 1-5/Phosphorelay intermediate protein YPD1), protein histidine kinase binding (IEA with S. cerevisiae: YPD1), transferase activity, transferring phosphorus-containing groups (IEA with S. cerevisiae: YP…	ORF, Verified
C1_07600W_A	ATP7	Putative subunit of the F1F0-ATPase complex; colony morphology-related gene regulation by Ssn6; farnesol, macrophage-downregulated protein abundance; protein present in exponential and stationary yeast growth phases; Hap43-induced	proton transmembrane transporter activity (IEA with EBI: ATP synthase, F0 complex, subunit D, mitochondrial, EBI: ATP synthase, F0 complex, subunit D superfamily, mitochondrial), contributes_to proton-transporting ATP synthase activity, rotational mechanism (IEA with S. cerevisiae: ATP7)	ORF, Verified
C1_07910C_A	MRPL3	Ribosomal protein of the large subunit, mitochondrial; repressed in core stress response; protein present in exponential and stationary growth phase yeast cultures	ribonuclease III activity (IEA with EBI: Ribonuclease III, endonuclease domain superfamily, EBI: Ribonuclease III domain), structural constituent of ribosome (IEA with S. cerevisiae: MRPL3)	ORF, Uncharacterized
C1_08920W_A	RSM25	Ortholog(s) have structural constituent of ribosome activity and mitochondrial small ribosomal subunit localization	structural constituent of ribosome (IEA with S. cerevisiae: RSM25)	ORF, Uncharacterized
C1_09030C_A	COX5	Cytochrome oxidase subunit V; putative upstream CCAAT box regulatory element; macrophage/pseudohyphal-induced; repressed by nitric oxide; intron in 5'-UTR; Hap43p-dependent repression in low iron medium	cytochrome-c oxidase activity (TAS), contributes_to cytochrome-c oxidase activity (IEA with S. cerevisiae: COX5A, S. pombe: SPCC338.10c)	ORF, Verified
C1_09450C_A	NUP188	Putative nuclear pore complex subunit; transcript regulated by Nrg1 and Mig1	structural constituent of nuclear pore (IEA with S. cerevisiae: NUP188)	ORF, Uncharacterized
C1_09960W_A	PET100	Chaperone that facilitates the assembly of cytochrome c oxidase; plasma membrane protein	unfolded protein binding (IEA with S. cerevisiae: PET100)	ORF, Verified
C1_10960W_A	N/A	Ortholog(s) have inositol phosphoceramide synthase regulator activity, role in inositol phosphoceramide metabolic process and Golgi membrane, inositol phosphoceramide synthase complex localization	inositol phosphoceramide synthase regulator activity (IEA with S. cerevisiae: KEI1)	ORF, Uncharacterized
C1_11240C_A	CHO1	Putative phosphatidylserine synthase; ortholog of S. cerevisiae CHO1; transposon mutation affects filamentous growth; regulated by Nrg1, Tup1	CDP-diacylglycerol-serine O-phosphatidyltransferase activity (IDA), diacylglycerol binding (IDA), serine binding (IDA), CDP-diacylglycerol-serine O-phosphatidyltransferase activity (IEA with S. pombe: SPCC1442.12, S. cerevisiae: CHO1)	ORF, Verified
C1_11500C_A	ARO7	Putative chorismate mutase; fungal-specific (no human or murine homolog); alkaline upregulated	chorismate mutase activity (IEA with S. cerevisiae: ARO7)	ORF, Uncharacterized
C1_12260W_A	VPH2	Protein required for proper vacuolar ATPase assembly and vacuolar functions	unknown	ORF, Verified
C1_12360C_A	RIB3	3,4-Dihydroxy-2-butanone 4-phosphate synthase; homodimeric enzyme of riboflavin biosynthesis; converts ribulose 5-phosphate to L-3,4-dihydroxy-2-butanone 4-phosphate; transcription regulated on yeast-hyphal switch, macrophage interaction	3,4-dihydroxy-2-butanone-4-phosphate synthase activity (IDA), 3,4-dihydroxy-2-butanone-4-phosphate synthase activity (IEA with S. cerevisiae: RIB3)	ORF, Verified
C1_12610W_A	N/A	Ortholog(s) have structural constituent of ribosome activity and mitochondrial large ribosomal subunit localization	ribonuclease III activity (IEA with EBI: Ribonuclease III, endonuclease domain superfamily, EBI: Ribonuclease III domain) structural constituent of ribosome (IEA with S. cerevisiae: MRPL15)	ORF, Uncharacterized
C1_12660W_A	MAD1	Ortholog(s) have kinetochore adaptor activity, protein-containing complex binding activity	kinetochore adaptor activity (IEA with S. pombe: SPBC3D6.04c), protein-containing complex binding (IEA with S. cerevisiae: MAD1)	ORF, Uncharacterized
C1_12810W_A	RIB7	Putative 5-amino-6-(5-phosphoribosylamino)uracil reductase with a role in riboflavin biosynthesis; null mutant is inviable unless riboflavin is provided	5-amino-6-(5-phosphoribosylamino)uracil reductase activity (IEA with S. cerevisiae: RIB7)	ORF, Verified
C1_13370W_A	TCI1	Ortholog(s) have protein carrier activity, unfolded protein binding activity, role in ribosomal large subunit biogenesis and cytoplasm, nucleus localization	protein carrier activity (IEA with S. cerevisiae: ACL4), unfolded protein binding (IEA with S. cerevisiae: ACL4)	ORF, Uncharacterized
C2_00710W_A	NPL6	Component of the RSC chromatin remodeling complex; Hap43-induced; Spider biofilm repressed	unknown	ORF, Verified
C2_01030W_A	N/A	Ortholog(s) have structural constituent of ribosome activity, role in mitochondrial translation and mitochondrial large ribosomal subunit localization	rRNA binding (IEA with EBI: Large ribosomal subunit protein uL16, bacterial-type), structural constituent of ribosome (IEA with S. cerevisiae: MRPL16)	ORF, Uncharacterized
C2_01200C_A	REG1	Putative protein phosphatase regulatory subunit; Hap43-repressed gene; macrophage/pseudohyphal-induced; possibly regulated upon hyphal formation; flow model biofilm induced	unknown	ORF, Uncharacterized
C2_01300C_A	MNN24	Alpha-1,2-mannosyltransferase; required for normal cell wall mannan content	glycosyltransferase activity (IEA with EBI: Alpha-mannosyltransferase)	ORF, Verified
C2_02270C_A	N/A	Ortholog(s) have structural constituent of ribosome activity and mitochondrial small ribosomal subunit localization	structural constituent of ribosome (IEA with S. cerevisiae: MRPS8)	ORF, Uncharacterized
C2_03560C_A	N/A	Ortholog(s) have structural constituent of ribosome activity and mitochondrial large ribosomal subunit localization	structural constituent of ribosome (IEA with S. cerevisiae: MRPL35)	ORF, Uncharacterized
C2_04590C_A	QCR8	Putative ubiquinol cytochrome c reductase; macrophage and pseudohyphal-induced protein; colony morphology-related gene regulation by Ssn6; Hap43-repressed; Spider biofilm repressed	ubiquinol-cytochrome-c reductase activity (IEA with S. cerevisiae: QCR8)	ORF, Verified
C2_04710C_A	URE2	Functional homolog of S. cerevisiae Ure2p, which is a regulator of nitrogen utilization, and which also has an infectious prion form called [URE3]; forms [URE3] prion when expressed in S. cerevisiae	transcription corepressor activity (IGI with S. cerevisiae: URE2), glutathione peroxidase activity (IEA with S. cerevisiae: URE2), glutathione transferase activity (IEA with S. pombe: SPCC965.07c), phosphoprotein binding (IEA with S. cerevisiae: URE2), transcription corepressor activity (IEA with EBI: Transcriptional regulator Ure2)	ORF, Verified
C2_04800C_A	MDM10	Predicted component of the mitochondrial sorting and assembly machinery (SAM complex) and ER-mitochondria encounter structure (ERMES) complex with a role in protein import into mitochondria	unknown	ORF, Uncharacterized
C2_04810W_A	HIS3	Imidazoleglycerol-phosphate dehydratase, enzyme of histidine biosynthesis; functionally complements S. cerevisiae his3-1 mutation; hyphal-induced expression; regulated by Gcn2p and Gcn4p; fungal-specific (no human or murine homolog)	imidazoleglycerol-phosphate dehydratase activity (IGI with S. cerevisiae: HIS3), imidazoleglycerol-phosphate dehydratase activity (IEA with A. nidulans: hisB, S. cerevisiae: HIS3)	ORF, Verified
C2_05500W_A	ATP4	Putative F0-ATP synthase subunit 4; macrophage/pseudohyphal-induced; present in exponential and stationary growth phases	proton transmembrane transporter activity (IEA with EBI: ATP synthase, F0 complex, subunit B/MI25, EBI: ATP synthase, F0 complex, subunit B), contributes_to proton-transporting ATP synthase activity, rotational mechanism (IEA with S. cerevisiae: ATP4), contributes_to proton-transporting ATPase activity, rotational mechanism (IEA with S. cerevisiae: ATP4)	ORF, Verified
C2_06120C_A	N/A	Ortholog(s) have ubiquitin conjugating enzyme binding activity and role in negative regulation of protein ubiquitination, positive regulation of mRNA 3'-end processing, proteasome-mediated ubiquitin-dependent protein catabolic process	ubiquitin conjugating enzyme binding (IEA with S. cerevisiae: IPA1)	ORF, Uncharacterized
C2_06290C_A	ATP14	Putative mitochondrial F1F0 ATP synthase subunit; macrophage/pseudohyphal-induced	contributes_to ATPase (IEA with S. cerevisiae: ATP14), contributes_to proton-transporting ATP synthase activity, rotational mechanism (IEA with S. cerevisiae: ATP14)	ORF, Verified
C2_07670C_A	GLE1	Putative nucleoporin; moderately induced at 42 degrees C	enzyme activator activity (IEA with S. cerevisiae: GLE1), inositol hexakisphosphate binding (IEA with S. cerevisiae: GLE1), phospholipid binding (IEA with S. cerevisiae: GLE1), translation initiation factor binding (IEA with S. cerevisiae: GLE1)	ORF, Verified
C2_07680W_A	N/A	Ortholog(s) have structural constituent of ribosome activity and mitochondrial large ribosomal subunit localization	structural constituent of ribosome (IEA with S. cerevisiae: MRPL7)	ORF, Uncharacterized
C2_09380W_A	RRP15	Putative nucleolar protein; constituent of pre-60S ribosomal particles; Hap43-induced; repressed by prostaglandins	unknown	ORF, Uncharacterized
C2_09680W_A	BET1	Ortholog(s) have SNAP receptor activity and role in endoplasmic reticulum to Golgi vesicle-mediated transport, retrograde vesicle-mediated transport, Golgi to endoplasmic reticulum, vesicle fusion	SNAP receptor activity (IEA with S. cerevisiae: BET1)	ORF, Uncharacterized
C2_09840W_A	MTW1	Kinetochore component; amount of Nuf2p and Mtw1p protein detected at each centromere is consistent with a single kinetochore microtubule attachment site	unknown	ORF, Verified
C2_10280C_A	SPT23	Protein involved in regulation of unsaturated fatty acid biosynthesis; controls the expression of the Ole1p delta-9-fatty acid desaturase	unknown	ORF, Verified
C3_01080W_A	MRPL33	Putative mitochondrial ribosomal protein of the large subunit; Ssr1-repressed; rat catheter biofilm induced	structural constituent of ribosome (IEA with S. cerevisiae: MRPL33)	ORF, Uncharacterized
C3_01300C_A	NCE103	Carbonic anhydrase; converts of CO2 to bicarbonate; essential for virulence in host niches with limited CO2, normal white-opaque switch; Mnl1-induced in weak acid stress; Hap43-induced gene; F-12/CO2, rat catheter, Spider biofilm induced	carbonate dehydratase activity (IDA, ISS with S. cerevisiae: NCE103), carbonate dehydratase activity (IEA with S. cerevisiae: NCE103), zinc ion binding (IEA with EBI: Carbonic anhydrase, prokaryotic-like, conserved site, EBI: Carbonic anhydrase superfamily, EBI: Carbonic anhydrase)	ORF, Verified
C3_02370C_A	ALR1	Putative transporter of divalent cations; hyphal-induced expression; rat catheter biofilm induced	inorganic cation transmembrane transporter activity (IEA with S. cerevisiae: ALR1), magnesium ion transmembrane transporter activity (IEA with EBI: Magnesium transporter Alr1-like), metal ion transmembrane transporter activity (IEA with EBI: Mg2+ transporter protein, CorA-like/Zinc transport protein ZntB)	ORF, Uncharacterized
C3_02670W_A	N/A	Protein with a predicted role in 60S ribosomal subunit assembly; flow model biofilm induced	metal ion binding (IEA with EBI: Zinc finger, CCCH-type, EBI: Zinc finger, CCCH-type superfamily)	ORF, Uncharacterized
C3_04830C_A	FAS2	Alpha subunit of fatty-acid synthase; required for virulence in mouse systemic infection and rat oropharyngeal infection models; regulated by Efg1; fluconazole-induced; amphotericin B repressed; flow model and Spider biofilm repressed	fatty acid synthase activity (ISS with S. cerevisiae: FAS2, IMP), 3-oxoacyl-[acyl-carrier-protein] reductase (NADPH) activity (IEA with S. cerevisiae: FAS2), 3-oxoacyl-[acyl-carrier-protein] synthase activity (IEA with S. cerevisiae: FAS2), fatty acid synthase activity (IEA with S. pombe: SPAC4A8.11c, S. cerevisiae: FAS2), holo-[acyl-carrier-protein] synthase activity (IEA with S. cerevisiae: FAS…	ORF, Verified
C3_05800W_A	SEN54	Ortholog(s) have tRNA-intron endonuclease activity, role in tRNA-type intron splice site recognition and cleavage and mitochondrial outer membrane, tRNA-intron endonuclease complex localization	contributes_to tRNA-intron endonuclease activity (IEA with S. cerevisiae: SEN54)	ORF, Uncharacterized
C3_05830W_A	KRE6	Essential beta-1,6-glucan synthase subunit; change in mRNA length, not abundance, at yeast-hypha transition; alkaline induced by Rim101, on cell wall regeneration; Spider biofilm induced; Bcr1-repressed in RPMI a/a biofilms	glucosidase activity (IEA with S. cerevisiae: KRE6)	ORF, Verified
C3_06520C_A	N/A	Ortholog(s) have chromatin binding activity, role in lipid homeostasis, nuclear envelope organization, regulation of transcription by RNA polymerase II and nuclear envelope localization	chromatin binding (IEA with S. cerevisiae: BRR6)	ORF, Uncharacterized
C3_07320W_A	MDS3	TOR signaling pathway component; required for growth and hyphal formation at alkaline pH, for full virulence in a mouse model of systemic infection and for SD and Spider medium biofilm formation; role in chlamydospore formation	unknown	ORF, Verified
C3_07390C_A	RSM10	Ortholog(s) have structural constituent of ribosome activity and mitochondrial small ribosomal subunit localization	structural constituent of ribosome (IEA with S. cerevisiae: RSM10)	ORF, Uncharacterized
C3_07780C_A	NUP159	FG-nucleoporin component of central core of the nuclear pore complex (NPC); contributes to nucleocytoplasmic transport; rat catheter biofilm repressed	adenyl-nucleotide exchange factor activity (IEA with S. cerevisiae: NUP159), structural constituent of nuclear pore (IEA with S. cerevisiae: NUP159)	ORF, Uncharacterized
C4_00560C_A	MMM1	Subunit of ER-mitochondrion tether ERMES complex, required for evasion of host immune response	contributes to lipid transfer activity (IEA with S. cerevisiae: MMM1)	ORF, Uncharacterized
C4_00890W_A	ARO1	Putative pentafunctional arom enzyme; required for aromatic amino acid biosynthesis; involved in cell wall integrity and formation of biofilm; fungal-specific (no human or murine homolog); Gcn2p-, Gcn4p-regulated	3-dehydroquinate dehydratase activity (IEA with S. cerevisiae: ARO1), 3-dehydroquinate synthase activity (IEA with S. cerevisiae: ARO1), 3-phosphoshikimate 1-carboxyvinyltransferase activity (IEA with S. cerevisiae: ARO1), catalytic activity (IEA with EBI: RNA 3'-terminal phosphate cyclase/enolpyruvate transferase, alpha/beta), shikimate 3-dehydrogenase (NADP+) activity (IEA with S. cerevisiae: A…	ORF, Verified
C4_01150W_A	ASK1	Essential subunit of the Dam1 (DASH) complex, which acts in chromosome segregation by coupling kinetochores to spindle microtubules	contributes_to microtubule binding (ISA with S. cerevisiae: ASK1)	ORF, Verified
C4_01750C_A	FBA1	Fructose-bisphosphate aldolase; glycolytic enzyme; antigenic in murine/human infection; regulated by yeast-hypha switch; induced by Efg1, Gcn4, Hog1, fluconazole; phagocytosis-repressed; flow model biofilm induced; Spider biofilm repressed	protein binding (IPI with EBI: P00747), aldehyde-lyase activity (IEA with EBI: Fructose-bisphosphate aldolase, class-II), fructose-bisphosphate aldolase activity (IEA with S. cerevisiae: FBA1), melatonin binding (IEA with S. cerevisiae: FBA1), zinc ion binding (IEA with EBI: Fructose-bisphosphate aldolase, class-II)	ORF, Verified
C4_01870C_A	ERG8	Putative phosphomevalonate kinase; enzyme of the mevalonate pathway of isoprenoid biosynthesis; transcript regulated by Nrg1; possible drug target; not conserved in H. sapiens	mevalonate kinase activity (ISS), ATP binding (IEA with EBI: GHMP kinase N-terminal domain), phosphomevalonate kinase activity (IEA with S. cerevisiae: ERG8)	ORF, Uncharacterized
C4_01880W_A	TYR1	Putative prepephenate dehydrogenase; enzyme of tyrosine biosynthesis; fungal-specific (no human or murine homolog)	NADP binding (IEA with EBI: 6-phosphogluconate dehydrogenase, NADP-binding), prephenate dehydrogenase (NAD+) activity (IEA with S. pombe: SPCC1494.04c, S. cerevisiae: TYR1)	ORF, Uncharacterized
C4_01980C_A	CLC1	Clathrin light chain; subunit of the major coat protein involved in intracellular protein transport and endocytosis; rat cathetr and Spider biofilm repressed	structural molecule activity (IEA with EBI: Clathrin light chain)	ORF, Uncharacterized
C4_03200C_A	N/A	Ortholog(s) have 3-hydroxyacyl-[acyl-carrier-protein] dehydratase activity and mitochondrion localization	3-hydroxyacyl-[acyl-carrier-protein] dehydratase activity (IEA with S. cerevisiae: HTD2)	ORF, Uncharacterized
C4_03330W_A	IPK1	Ortholog of S. cerevisiae/S. pombe Ipk1; an inositol pentakisphosphate 2-kinase, a nuclear protein required for synthesis of 1,2,3,4,5,6-hexakisphosphate; Spider biofilm induced	ATP binding (IEA with EBI: Inositol-pentakisphosphate 2-kinase), inositol-1,3,4,5,6-pentakisphosphate 2-kinase activity (IEA with S. cerevisiae: IPK1)	ORF, Verified
C4_04260C_A	FZO1	Mitochondrial biogenesis protein; rat catheter and Spider biofilm induced	GTPase activity (IEA with S. cerevisiae: FZO1)	ORF, Uncharacterized
C4_04820C_A	N/A	Ortholog(s) have structural constituent of ribosome activity and mitochondrial large ribosomal subunit localization	structural constituent of ribosome (IEA with S. cerevisiae: MRPL11)	ORF, Uncharacterized
C5_00770C_A	FOL1	Putative dihydroneopterin aldolase (dihydro-6-hydroxymethylpterin pyrophosphokinase); fungal-specific (no human or murine homolog)	2-amino-4-hydroxy-6-hydroxymethyldihydropteridine diphosphokinase activity (IEA with S. cerevisiae: FOL1), dihydroneopterin aldolase activity (IEA with S. cerevisiae: FOL1), dihydropteroate synthase activity (IEA with S. cerevisiae: FOL1)	ORF, Uncharacterized
C5_00790C_A	NRD1	Putative RNA-binding protein; transcript is upregulated in an RHE model of oral candidiasis	RNA binding (IEA with S. pombe: SPAC222.09, S. cerevisiae: NRD1), RNA polymerase II C-terminal domain binding (IEA with S. pombe: SPAC222.09), nucleic acid binding (IEA with EBI: RNA-binding domain superfamily), protein domain specific binding (IEA with S. cerevisiae: NRD1), transcription regulatory region RNA binding (IEA with S. cerevisiae: NRD1)	ORF, Uncharacterized
C5_01240W_A	AUR1	Inositolphosphorylceramide (IPC) synthase; catalyzes the key step in sphingolipid biosynthesis; antifungal drug target; flow model biofilm induced; Spider biofilm induced	inositol phosphoceramide synthase activity (ISS with S. cerevisiae: AUR1), inositol phosphoceramide synthase activity (IEA with S. cerevisiae: AUR1)	ORF, Verified
C5_01460W_A	YBL053 (TOF1)	Putative subunit of a replication fork-pausing checkpoint complex	DNA binding (IEA with S. pombe: SPBC216.06c), Y-form DNA binding (IEA with S. pombe: SPBC216.06c), double-stranded DNA binding (IEA with S. pombe: SPBC216.06c)	ORF, Verified
C5_01720C_A	RCY1	Putative F-box protein involved in endocytic membrane traffic and/or recycling; fungal-specific (no human or murine homolog)	SNARE binding (IEA with S. cerevisiae: RCY1)	ORF, Uncharacterized
C5_02900W_A	SPT8	Subunit of the SAGA transcriptional regulatory complex	TBP-class protein binding (IEA with S. cerevisiae: SPT8), transcription coregulator activity (IEA with S. cerevisiae: SPT8)	ORF, Uncharacterized
C5_05190W_A	PCL5	Putative cyclin for Pho85 kinase; Gcn4-induced; suppresses toxicity of C. albicans Gcn4 overproduction in S. cerevisiae via increased Pho85-dependent phosphorylation and degradation of Gcn4; rat catheter and Spider biofilm induced	cyclin-dependent protein serine/threonine kinase regulator activity (ISS with S. cerevisiae: PCL5), cyclin-dependent protein serine/threonine kinase regulator activity (IEA with S. cerevisiae: PCL5), protein kinase binding (IEA with EBI: Cyclin PHO80-like)	ORF, Verified
C5_05410C_A	ILV3	Dihydroxyacid dehydratase; repressed by nitric oxide; macrophage-induced protein; protein in exponential and stationary growth phase; Sef1, Sfu1p, Hap43-regulated; farnesol-repressed; flow model biofilm induced; Spider biofilm repressed	dihydroxy-acid dehydratase activity (IEA with S. cerevisiae: ILV3)	ORF, Uncharacterized
C6_00870C_A	ILV5	Ketol-acid reductoisomerase; antigenic; regulated by Gcn4; GlcNAc, amino acid starvation (3-AT)-induced; macrophage-repressed protein; protein present in exponential and stationary phase; flow model and Spider biofilm repressed	double-stranded DNA binding (IEA with S. cerevisiae: ILV5), ketol-acid reductoisomerase activity (IEA with S. cerevisiae: ILV5), oxidoreductase activity (IEA with EBI: 6-phosphogluconate dehydrogenase, domain 2, EBI: Ketol-acid reductoisomerase)	ORF, Uncharacterized
C6_01280W_A	EXO84	Predicted subunit of the exocyst complex, involved in exocytosis; localizes to a crescent on the surface of the hyphal tip	unknown	ORF, Verified
C6_01980C_A	N/A	Mitochondrial ribosomal protein of the small subunit; S. cerevisiae ortholog is essential for viability; Spider biofilm repressed	structural constituent of ribosome (IEA with S. cerevisiae: MRPS18)	ORF, Uncharacterized
C6_02370C_A	RSM23	Ortholog(s) have structural constituent of ribosome activity and mitochondrial small ribosomal subunit localization	structural constituent of ribosome (IEA with S. cerevisiae: RSM23)	ORF, Uncharacterized
C6_02570C_A	SEC20	Essential protein; similar to S. cerevisiae Sec20p; depletion causes membrane accumulation and drug sensitivity; expression regulated by growth phase; O-mannosylation regulates proteolysis; does not complement S. cerevisiae sec20-1 mutant	SNAP receptor activity (IEA with EBI: Sec20)	ORF, Verified
C6_03110C_A	N/A	Ortholog of S. cerevisiae : ASA1, C. glabrata CBS138 : CAGL0K07920g, C. dubliniensis CD36 : Cd36_63960, C. parapsilosis CDC317 : CPAR2_600230 and C. auris B8441 : B9J08_002518	unknown	ORF, Uncharacterized
C6_04120C_A	SPC105	Ortholog(s) have microtubule binding activity, role in mitotic spindle assembly checkpoint signaling, protein localization to kinetochore, sister chromatid biorientation and kinetochore localization	microtubule binding (IEA with S. cerevisiae: SPC105)	ORF, Uncharacterized
C7_00210C_A	TEL2	Ortholog(s) have telomeric DNA binding activity and role in protein localization to chromosome, telomere maintenance, telomere maintenance via telomerase	telomeric DNA binding (IEA with S. cerevisiae: TEL2)	ORF, Uncharacterized
C7_00730W_A	MET28	Predicted bZIP domain-containing transcription factor; protein induced during the mating process; possibly essential, disruptants not obtained by UAU1 method; Hap43-repressed; rat catheter biofilm induced	DNA-binding transcription factor activity (IEA with EBI: Basic-leucine zipper domain, EBI: Basic-leucine zipper domain superfamily), RNA polymerase II-specific DNA-binding transcription factor binding (IEA with S. cerevisiae: MET28)	ORF, Uncharacterized
C7_01180W_A	MDM12	Ortholog(s) have lipid transfer activity	lipid transfer activity (IEA with S. cerevisiae: MDM12)	ORF, Uncharacterized
C7_01650W_A	N/A	RNA polymerase III transcription initiation factor complex (TFIIIC) subunit; growth phase regulated protein; downregulaated in stationary phase yeast cultures; Hap43-repressed; flow model biofilm induced; Spider biofilm repressed	contributes_to DNA binding, bending (IEA with S. cerevisiae: TFC7), contributes_to RNA polymerase III general transcription initiation factor activity (IEA with S. cerevisiae: TFC7), contributes_to RNA polymerase III type 1 promoter sequence-specific DNA binding (IEA with S. cerevisiae: TFC7), contributes_to RNA polymerase III type 2 promoter sequence-specific DNA binding (IEA with S. cerevisiae:…	ORF, Uncharacterized
C7_02060W_A	LIG1 (TRL1)	tRNA ligase; functional homolog of S. cerevisiae Trl1	GTP-dependent polyribonucleotide 5'-hydroxyl-kinase activity (IMP, IDA), RNA ligase (ATP) activity (IGI with S. cerevisiae: TRL1, IMP, IDA), 2',3'-cyclic-nucleotide 3'-phosphodiesterase activity (IEA with S. cerevisiae: TRL1), ATP binding (IEA with EBI: tRNA ligase Trl1, fungi, EBI: tRNA ligase, phosphodiesterase, EBI: tRNA ligase, kinase domain, fungi), GTP-dependent polyribonucleotide 5'-hydrox…	ORF, Verified
C7_02680W_A	TOM22	Putative mitochondrial import receptor subunit; colony morphology-related gene regulation by Ssn6	contributes_to protein transmembrane transporter activity (IEA with S. cerevisiae: TOM22)	ORF, Verified
C7_02770W_A	CHS1	Chitin synthase; essential; for primary septum synthesis in yeast and hyphae; 1 of several chitin synthases; enzymatically activated by proteolytic processing; complements defects of S. cerevisiae chs1 or chs2; Spider biofilm repressed	chitin synthase activity (IGI with S. cerevisiae: CHS1, IMP, IDA), chitin synthase activity (IEA with S. cerevisiae: CHS2)	ORF, Verified
C7_02950C_A	DBF4	Regulatory subunit of Cdc7p-Dbf4p protein kinase complex that acts as negative regulator of hyphal development; cell-cycle regulated periodic mRNA expression; S. cerevisiae ortholog is not cell-cycle regulated	protein kinase activity (IMP), DNA replication origin binding (IEA with S. cerevisiae: DBF4), nucleic acid binding (IEA with EBI: Zinc finger, DBF-type), protein kinase activator activity (IEA with S. pombe: SPCC550.13), protein serine/threonine kinase activator activity (IEA with S. cerevisiae: DBF4), zinc ion binding (IEA with EBI: Zinc finger, DBF-type)	ORF, Verified
C7_03000C_A	N/A	Ortholog(s) have structural constituent of ribosome activity and mitochondrial large ribosomal subunit localization	structural constituent of ribosome (IEA with S. cerevisiae: MRPL49)	ORF, Uncharacterized
C7_03120W_A	TIM54	Predicted component of the mitochondrial TIM22 complex; involved in protein import into mitochondrial inner membrane; Spider biofilm repressed	contributes_to protein transmembrane transporter activity (IEA with S. cerevisiae: TIM54)	ORF, Uncharacterized
C7_04270C_A	UFE1	Protein interacting with Sec20p, possibly involved in retrograde transport between the Golgi and the endoplasmic reticulum; functional homolog of S. cerevisiae Ufe1p, which is an ER t-SNARE that mediates the retrograde traffic	SNAP receptor activity (IGI with S. cerevisiae: UFE1)	ORF, Verified
CR_00250W_A	ATP17	Mitochondrial ATPase complex subunit; downregulated by Efg1p; flucytosine induced; caspofungin repressed	contributes_to ATPase (IEA with S. cerevisiae: ATP17), contributes_to proton-transporting ATP synthase activity, rotational mechanism (IEA with S. cerevisiae: ATP17)	ORF, Verified
CR_00410W_A	RTT109	Histone acetyltransferase, mutants are sensitive to DNA damage, show decreased virulence in mice, decreased white-to-opaque switching and increased susceptibility to killing by macrophages	histone H3 acetyltransferase activity (ISA with S. cerevisiae: RTT109, IMP), histone H3K56 acetyltransferase activity (IMP), histone H3 acetyltransferase activity (IEA with S. cerevisiae: RTT109), histone H3K56 acetyltransferase activity (IEA with S. pombe: SPBC342.06c)	ORF, Verified
CR_00480W_A	MRPL6	Putative mitochondrial ribosomal protein	rRNA binding (IEA with EBI: Large ribosomal subunit protein uL6, alpha-beta domain, EBI: Large ribosomal subunit protein uL6-like, EBI: Large ribosomal subunit protein uL6-like, alpha-beta domain superfamily, EBI: Large ribosomal subunit protein uL6, bacterial-type), structural constituent of ribosome (IEA with S. cerevisiae: MRPL6)	ORF, Uncharacterized
CR_00510C_A	ADE1	Phosphoribosylaminoimadazole succinocarboxamide synthetase, enzyme of adenine biosynthesis; not induced in GCN response, unlike the S. cerevisiae ortholog; fungal-specific (no human or murine homolog); levels decrease in stationary phase	phosphoribosylaminoimidazolesuccinocarboxamide synthase activity (NAS, IGI with S. cerevisiae: ADE1), phosphoribosylaminoimidazolesuccinocarboxamide synthase activity (IEA with S. cerevisiae: ADE1, S. pombe: SPBC409.10)	ORF, Verified
CR_00680W_A	BUD22	Protein with a predicted role in 18S rRNA maturation and small ribosomal subunit biogenesis; repressed in core stress response; repressed by prostaglandins	unknown	ORF, Uncharacterized
CR_00890C_A	N/A	Has domain(s) with predicted role in mitochondrial outer membrane translocase complex assembly, protein insertion into mitochondrial outer membrane	unknown	ORF, Uncharacterized
CR_01300W_A	N/A	Putative 12kDa subunit of mitochondrial NADH-ubiquinone oxidoreductase; gene has intron	unknown	ORF, Uncharacterized
CR_01370C_A	N/A	Ortholog(s) have structural constituent of ribosome activity and mitochondrial small ribosomal subunit localization	structural constituent of ribosome (IEA with S. cerevisiae: MRPS28)	ORF, Uncharacterized
CR_01620C_A	MET6	Essential 5-methyltetrahydropteroyltriglutamate-homocysteine methyltransferase (cobalamin-independent methionine synthase); antigenic in murine/human systemic infection; heat shock, estrogen, GCN-induced; Spider biofilm repressed	5-methyltetrahydropteroyltriglutamate-homocysteine S-methyltransferase activity (ISS with S. cerevisiae: MET6, IDA, IGI with S. cerevisiae: MET6), zinc ion binding (IDA), 5-methyltetrahydropteroyltriglutamate-homocysteine S-methyltransferase activity (IEA with S. pombe: SPAC9.09, S. cerevisiae: MET6), zinc ion binding (IEA with EBI: Cobalamin-independent methionine synthase MetE, N-terminal, EBI:…	ORF, Verified
CR_02090C_A	CET1	mRNA 5'-triphosphatase; large subunit of mRNA capping enzyme; positively regulates Ceg1 activity; functional homolog of S. cerevisiae Cet1; Cet1 and Cgt1 form a 2:1 complex; flow model biofilm induced	ATPase (IDA), polynucleotide 5'-phosphatase activity (IMP, IDA), polynucleotide 5'-phosphatase activity (IEA with S. cerevisiae: CET1)	ORF, Verified
CR_02540W_A	CHO2	Phosphatidyl-ethanolamine N-methyltransferase; fungal-specific (no human or murine homolog); amphotericin B repressed; Hap43p-induced gene	phosphatidylethanolamine N-methyltransferase activity (IEA with S. cerevisiae: CHO2, S. pombe: SPBC26H8.03)	ORF, Verified
CR_02580W_A	PAN6	Ortholog(s) have pantoate-beta-alanine ligase activity and role in pantothenate biosynthetic process	catalytic activity (IEA with EBI: Cytidyltransferase-like domain), pantoate-beta-alanine ligase activity (IEA with S. cerevisiae: PAN6)	ORF, Uncharacterized
CR_02990C_A	RIB1	Ortholog(s) have pantoate-beta-alanine ligase activity and role in pantothenate biosynthetic process	GTP cyclohydrolase II activity (IEA with EBI: GTP cyclohydrolase II, RibA), cyclohydrolase activity (IEA with S. cerevisiae: RIB1)	ORF, Verified
CR_03430W_A	PKR1	Ortholog(s) have role in vacuolar proton-transporting V-type ATPase complex assembly and integral component of endoplasmic reticulum membrane localization	unknown	ORF, Verified
CR_03530W_A	FMP13	Mitochondrial inner membrane protein; mammalian mitofilin domain; Spider biofilm repressed	unknown	ORF, Verified
CR_03930C_A	N/A	Ortholog(s) have role in lipid homeostasis, nuclear envelope organization and endoplasmic reticulum, integral component of membrane, nuclear envelope localization	unknown	ORF, Uncharacterized
CR_03950W_A	RRF1, FIL1	Ortholog(s) have role in mitochondrial translation and mitochondrion localization	unknown	ORF, Uncharacterized
CR_04140W_A	NAM9	Putative mitochondrial ribosomal component of the small subunit; possibly an essential gene, disruptants not obtained by UAU1 method; Spider biofilm repressed	RNA binding (IEA with EBI: RNA-binding S4 domain superfamily, EBI: RNA-binding S4 domain), rRNA binding (IEA with EBI: Small ribosomal subunit protein uS4, conserved site, EBI: Small ribosomal subunit protein uS4), structural constituent of ribosome (IEA with S. cerevisiae: NAM9)	ORF, Uncharacterized
CR_04520W_A	MIM1	Predicted mitochondrial protein involved in outer membrane protein import; rat catheter biofilm repressed	unknown	ORF, Uncharacterized
CR_05100W_A	BIR1	BIR-containing protein, inhibitor of apoptosis; regulates caspase-like activity under apoptotic stresses	unknown	ORF, Verified
CR_06640C_A	ICE2	Integral ER membrane protein; predicted to be an ER-PM tethering protein; predicted to act in maintenance of ER zinc homeostasis; null mutant has reduced levels of phosphatidylcholine; Spider biofilm induced	protein serine/threonine phosphatase inhibitor activity (IEA with S. cerevisiae: ICE2)	ORF, Verified
CR_07390C_A	MRPL8	Mitochondrial 60S ribosomal protein subunit; Hap43p-repressed gene	structural constituent of ribosome (IEA with S. cerevisiae: MRPL8)	ORF, Uncharacterized
CR_07710W_A	ARO2 (ARO22)	Putative chorismate synthase; fungal-specific (no human or murine homolog); protein level decreased in stationary phase yeast cultures; GlcNAc-induced protein	chorismate synthase activity (IEA with S. cerevisiae: ARO2), riboflavin reductase (NADPH) activity (IEA with S. cerevisiae: ARO2)	ORF, Uncharacterized
CR_09320C_A	PHO88	Protein with a role in phosphate transport; biofilm-regulated expression; amphotericin B repressed	unknown	ORF, Verified
CR_09760W_A	MED21 (SRB7)	Ortholog(s) have RNA polymerase II-specific DNA-binding transcription factor binding, transcription coactivator activity, transcription corepressor activity	RNA polymerase II-specific DNA-binding transcription factor binding (IEA with S. cerevisiae: SRB7), transcription coactivator activity (IEA with S. cerevisiae: SRB7), transcription corepressor activity (IEA with S. cerevisiae: SRB7)	ORF, Uncharacterized
CR_10010C_A	MSS51	Putative mRNA maturation factor; fungal-specific (no human or murine homolog)	translation regulator activity (IEA with S. cerevisiae: MSS51)	ORF, Uncharacterized
CR_10650W_A	LTV1	Putative GSE complex component; repressed by prostaglandins	unknown	ORF, Uncharacterized

## Sheet: Table S2
Fungal strain number (fRS)	Description	Alias	Selection marker	Antifungal resistance	Source
1	Laboratory reference strain for Candida albicans	SC5314, Wildtype, WT	N/A	N/A	Peter Belenky via Deborah Hogan
187	Constitutively expressed CRISPRi control strain. CRISPRi plasmid pRS 159 transformed into fRS1.	N/A	NAT	N/A	Shapiro Lab
242	Azole resistant clinical isolate of Candida albicans with amino acid substitutions T229A and F449S in ERG11, as well as overexpression of MDR1, CDR1, and CDR.	Azole resistant background (ARB), FLUR, CaLC182, Ca4617	N/A	Azole resistant	Leah Cowen via Aaron Mitchell
246	Echinocandin resistant clinical isolate of Candida albicans with a mutation in the FKS1 gene F641S.	Echinocandin resistant background (ERB), CASPR, CaLC990, DPL15	N/A	Echinocandin resistant	Leah Cowen via David Perlin
583	Regulatable CRISPRi targetting HSP90 expression. CRISPRi plasmid pRS481 transformed into fRS1.	N/A	NAT	N/A	Shapiro Lab
584	Regulatable CRISPRi control strain. CRISPRi plasmid pRS479 transformed into fRS1.	N/A	NAT	N/A	Shapiro Lab
692	Constitutively expressed CRISPRi targetting KSP1 expression. CRISPRi plasmid pRS595 transformed into fRS1.	N/A	NAT	N/A	Shapiro Lab
704	Regulatable CRISPRi targetting HSP90 expression. CRISPRi plasmid pRS481 transformed into fRS242.	N/A	NAT	Azole resistant	Shapiro Lab
705	Regulatable CRISPRi targetting HSP90 expression. CRISPRi plasmid pRS481 transformed into fRS246.	N/A	NAT	Echinocandin resistant	Shapiro Lab
756	Inducible CRISPRi targetting KSP1 expression. CRISPRi plasmid pRS680 transformed into fRS1.	N/A	NAT	N/A	Shapiro Lab
831	Regulatable CRISPRi targetting C3_01080W (MRPL33) expression. CRISPRi plasmid pRS755 transformed into fRS 1.	N/A	NAT	N/A	Shapiro Lab
832	Regulatable CRISPRi targetting C3_01080W (MRPL33) expression. CRISPRi plasmid pRS755 transformed into fRS 242.	N/A	NAT	Azole resistant	Shapiro Lab
833	CRISPRi targetting C3_01080W (MRPL33) expression. CRISPRi plasmid pRS755 transformed into fRS 246.	N/A	NAT	Echinocandin resistant	Shapiro Lab
834	Regulatable CRISPRi targetting C3_01080W (MRPL33) expression. CRISPRi plasmid pRS756 transformed into fRS 1.	N/A	NAT	N/A	Shapiro Lab
835	Regulatable CRISPRi targetting C3_01080W (MRPL33) expression. CRISPRi plasmid pRS756 transformed into fRS 242.	N/A	NAT	Azole resistant	Shapiro Lab
836	CRISPRi targetting C3_01080W (MRPL33) expression. CRISPRi plasmid pRS 756 transformed into fRS 246.	N/A	NAT	Echinocandin resistant	Shapiro Lab
837	Regulatable CRISPRi targetting C4_00560C (MMM1) expression. CRISPRi plasmid pRS 757 transformed into fRS 1.	N/A	NAT	N/A	Shapiro Lab
838	Regulatable CRISPRi targetting C4_00560C (MMM1) expression. CRISPRi plasmid pRS 757 transformed into fRS 242.	N/A	NAT	Azole resistant	Shapiro Lab
839	Regulatable CRISPRi targetting C4_00560C (MMM1) expression. CRISPRi plasmid pRS 757 transformed into fRS 246.	N/A	NAT	Echinocandin resistant	Shapiro Lab
840	Regulatable CRISPRi targetting C4_00560C (MMM1) expression. CRISPRi plasmid pRS 758 transformed into fRS 1.	N/A	NAT	N/A	Shapiro Lab
841	Regulatable CRISPRi targetting C4_00560C (MMM1) expression. CRISPRi plasmid pRS 758 transformed into fRS 242.	N/A	NAT	Azole resistant	Shapiro Lab
842	Regulatable CRISPRi targetting C4_00560C (MMM1) expression. CRISPRi plasmid pRS 758 transformed into fRS 246.	N/A	NAT	Echinocandin resistant	Shapiro Lab
843	Regulatable CRISPRi targetting C4_01150W (ASK1) expression. CRISPRi plasmid pRS 759 transformed into fRS 1.	N/A	NAT	N/A	Shapiro Lab
844	Regulatable CRISPRi targetting C4_01150W (ASK1) expression. CRISPRi plasmid pRS 759 transformed into fRS 242.	N/A	NAT	Azole resistant	Shapiro Lab
845	Regulatable CRISPRi targetting C4_01150W (ASK1) expression. CRISPRi plasmid pRS 759 transformed into fRS 246.	N/A	NAT	Echinocandin resistant	Shapiro Lab
846	Regulatable CRISPRi targetting C4_01150W (ASK1) expression. CRISPRi plasmid pRS 760 transformed into fRS 1.	N/A	NAT	N/A	Shapiro Lab
847	Regulatable CRISPRi targetting C4_01150W (ASK1) expression. CRISPRi plasmid pRS 760 transformed into fRS 242.	N/A	NAT	Azole resistant	Shapiro Lab
848	Regulatable CRISPRi targetting C4_01150W (ASK1) expression. CRISPRi plasmid pRS 760 transformed into fRS 246.	N/A	NAT	Echinocandin resistant	Shapiro Lab
947	Regulatable CRISPRi control strain. CRISPRi plasmid pRS479 transformed into fRS242.	N/A	NAT	Azole resistant	Shapiro Lab
948	Regulatable CRISPRi control strain. CRISPRi plasmid pRS479 transformed into fRS246.	N/A	NAT	Echinocandin resistant	Shapiro Lab
1068	Regulatable CRISPRi targetting C7_03000C expression. CRISPRi plasmid pRS1037 transformed into fRS 1.	N/A	NAT	N/A	Shapiro Lab
1069	Regulatable CRISPRi targetting C7_03000C expression. CRISPRi plasmid pRS1038 transformed into fRS 1.	N/A	NAT	N/A	Shapiro Lab
1070	Regulatable CRISPRi targetting C4_00890W (ARO1) expression. CRISPRi plasmid pRS1039 transformed into fRS1.	N/A	NAT	N/A	Shapiro Lab
1071	Regulatable CRISPRi targetting C4_00890W (ARO1) expression. CRISPRi plasmid pRS1040 transformed into fRS 1.	N/A	NAT	N/A	Shapiro Lab
1076	Regulatable CRISPRi targetting C7_03000C expression. CRISPRi plasmid pRS1037 transformed into fRS 242.	N/A	NAT	Azole resistant	Shapiro Lab
1077	Regulatable CRISPRi targetting C7_03000C expression. CRISPRi plasmid pRS 1038 transformed into fRS 242.	N/A	NAT	Azole resistant	Shapiro Lab
1078	Regulatable CRISPRi targetting C4_00890W (ARO1) expression. CRISPRi plasmid pRS1039 transformed into fRS242.	N/A	NAT	Azole resistant	Shapiro Lab
1079	Regulatable CRISPRi targetting C4_00890W (ARO1) expression. CRISPRi plasmid pRS1040 transformed into fRS242.	N/A	NAT	Azole resistant	Shapiro Lab
1084	Regulatable CRISPRi targetting C7_03000C expression. CRISPRi plasmid pRS1037 transformed into fRS 246.	N/A	NAT	Echinocandin resistant	Shapiro Lab
1085	Regulatable CRISPRi targetting C7_03000C expression. CRISPRi plasmid pRS1038 transformed into fRS 246.	N/A	NAT	Echinocandin resistant	Shapiro Lab
1086	Regulatable CRISPRi targetting C4_00890W (ARO1) expression. CRISPRi plasmid pRS1039 transformed into fRS246.	N/A	NAT	Echinocandin resistant	Shapiro Lab
1087	Regulatable CRISPRi targetting C4_00890W (ARO1) expression. CRISPRi plasmid pRS1040 transformed into fRS246.	N/A	NAT	Echinocandin resistant	Shapiro Lab
1150	Regulatable CRISPRi targetting C4_00890W (ARO1) expression. CRISPRi plasmid pRS1075 transformed into fRS1.	N/A	NAT	N/A	Shapiro Lab
1151	Regulatable CRISPRi targetting C4_00890W (ARO1) expression. CRISPRi plasmid pRS1075 transformed into fRS242.	N/A	NAT	Azole resistant	Shapiro Lab
1152	Regulatable CRISPRi targetting C4_00890W (ARO1) expression. CRISPRi plasmid pRS1075 transformed into fRS246.	N/A	NAT	Echinocandin resistant	Shapiro Lab
1153	Regulatable CRISPRi targetting C4_00890W (ARO1) expression. CRISPRi plasmid pRS1076 transformed into fRS1.	N/A	NAT	N/A	Shapiro Lab
1154	Regulatable CRISPRi targetting C4_00890W (ARO1) expression. CRISPRi plasmid pRS1076 transformed into fRS242.	N/A	NAT	Azole resistant	Shapiro Lab
1155	Regulatable CRISPRi targetting C4_00890W (ARO1) expression. CRISPRi plasmid pRS1076 transformed into fRS246.	N/A	NAT	Echinocandin resistant	Shapiro Lab
1156	Regulatable CRISPRi targetting C7_03000C expression. CRISPRi plasmid pRS1077 transformed into fRS 1.	N/A	NAT	N/A	Shapiro Lab
1157	Regulatable CRISPRi targetting C7_03000C expression. CRISPRi plasmid pRS1077 transformed into fRS 242.	N/A	NAT	Azole resistant	Shapiro Lab
1158	Regulatable CRISPRi targetting C7_03000C expression. CRISPRi plasmid pRS1077 transformed into fRS 246.	N/A	NAT	Echinocandin resistant	Shapiro Lab
1288	Regulatable CRISPRi targetting C4_01150W (ASK1) expression. CRISPRi plasmid pRS 1213 transformed into fRS 1.	N/A	NAT	N/A	Shapiro Lab
1289	Regulatable CRISPRi targetting C4_01150W (ASK1) expression. CRISPRi plasmid pRS 1214 transformed into fRS 1.	N/A	NAT	N/A	Shapiro Lab
1290	Regulatable CRISPRi targetting C4_00560C (MMM1) expression. CRISPRi plasmid pRS 1215 transformed into fRS 1.	N/A	NAT	N/A	Shapiro Lab
1291	Regulatable CRISPRi targetting C4_00560C (MMM1) expression. CRISPRi plasmid pRS 1216 transformed into fRS 1.	N/A	NAT	N/A	Shapiro Lab
1292	Regulatable CRISPRi targetting C3_01080W (MRPL33) expression. CRISPRi plasmid pRS1217 transformed into fRS 1.	N/A	NAT	N/A	Shapiro Lab
1293	Regulatable CRISPRi targetting C3_01080W (MRPL33) expression. CRISPRi plasmid pRS1218 transformed into fRS 1.	N/A	NAT	N/A	Shapiro Lab
1294	Regulatable CRISPRi targetting C4_01750C (FBA1) expression. CRISPRi plasmid pRS 1219 transformed into fRS 1.	N/A	NAT	N/A	Shapiro Lab
1295	Regulatable CRISPRi targetting C4_01750C (FBA1) expression. CRISPRi plasmid pRS 1220 transformed into fRS 1.	N/A	NAT	N/A	Shapiro Lab
1296	Regulatable CRISPRi targetting C4_01750C (FBA1) expression. CRISPRi plasmid pRS 1221 transformed into fRS 1.	N/A	NAT	N/A	Shapiro Lab
1297	Regulatable CRISPRi targetting C4_01750C (FBA1) expression. CRISPRi plasmid pRS 1222 transformed into fRS 1.	N/A	NAT	N/A	Shapiro Lab

## Sheet: Table S3
Plasmid number (pRS)	Description	Source	Delective markers
159	Constitutively expressed C. albicans optimised CRISPRi plasmid backbone	Shapiro Lab	NAT, AMP
250	Candida plasmid with a Candida-optimized Hygromycin B resistance cassette, containing the tetO promoter and tetracycline transactivator (TAR)	Cowen lab	AMP, HYGB
479	Regulatable C. albicans optimised CRISPRi plasmid backbone	Shapiro lab	NAT, AMP
481	Regulatable C. albicans optimised CRISPRi plasmid targetting C7_02030W (HSP90) (oRS 416)	Shapiro lab	NAT, AMP
595	Constitutively expressed C. albicans optimised CRISPRi plasmid targetting C1_07380C (KSP1) (oRS 1220)	Shapiro lab	NAT, AMP
680	Regulatable C. albicans optimised CRISPRi plasmid targetting C1_07380C (KSP1) (oRS 1220)	Shapiro lab	NAT, AMP
755	Regulatable C. albicans optimised CRISPRi plasmid targetting C3_01080W (MRPL33) (oRS 1506)	Shapiro lab	NAT, AMP
756	Regulatable C. albicans optimised CRISPRi plasmid targetting C3_01080W (MRPL33) (oRS 1507)	Shapiro lab	NAT, AMP
757	Regulatable C. albicans optimised CRISPRi plasmid targetting C4_00560C (MMM1) (oRS 1508)	Shapiro lab	NAT, AMP
758	Regulatable C. albicans optimised CRISPRi plasmid targetting C4_00560C (MMM1) (oRS 1509)	Shapiro lab	NAT, AMP
759	Constitutively expressed C. albicans optimised CRISPRi plasmid targetting C4_01150W (ASK1) (oRS 1510)	Shapiro lab	NAT, AMP
760	Constitutively expressed C. albicans optimised CRISPRi plasmid targetting C4_01150W (ASK1) (oRS 1511)	Shapiro lab	NAT, AMP
1037	Regulatable C. albicans optimised CRISPRi plasmid targetting C7_03000 (oRS 1812)	Shapiro lab	NAT, AMP
1038	Regulatable C. albicans optimised CRISPRi plasmid targetting C7_03000 (oRS 1813)	Shapiro lab	NAT, AMP
1039	Regulatable C. albicans optimised CRISPRi plasmid targetting C4_00890W (ARO1) (oRS 1814)	Shapiro lab	NAT, AMP
1040	Regulatable C. albicans optimised CRISPRi plasmid targetting C4_00890W (ARO1) (oRS 1815)	Shapiro lab	NAT, AMP
1075	Regulatable C. albicans optimised CRISPRi plasmid targetting C4_00890W (ARO1) (oRS 1848)	Shapiro lab	NAT, AMP
1076	Regulatable C. albicans optimised CRISPRi plasmid targetting C4_00890W (ARO1) (oRS 1849)	Shapiro lab	NAT, AMP
1077	Regulatable C. albicans optimised CRISPRi plasmid targetting C7_03000 (oRS 1850)	Shapiro lab	NAT, AMP
1213	Regulatable C. albicans optimised CRISPRi plasmid targetting C4_01150W (ASK1) (oRS 2053)	Shapiro lab	NAT, AMP
1214	Regulatable C. albicans optimised CRISPRi plasmid targetting C4_01150W (ASK1) (oRS 2054)	Shapiro lab	NAT, AMP
1215	Regulatable C. albicans optimised CRISPRi plasmid targetting C4_00560C (MMM1) (oRS 2055)	Shapiro lab	NAT, AMP
1216	Regulatable C. albicans optimised CRISPRi plasmid targetting C4_00560C (MMM1) (oRS 2056)	Shapiro lab	NAT, AMP
1217	Regulatable C. albicans optimised CRISPRi plasmid targetting C3_01080W (MRPL33) (oRS 2057)	Shapiro lab	NAT, AMP
1218	Regulatable C. albicans optimised CRISPRi plasmid targetting C3_01080W (MRPL33) (oRS 2058)	Shapiro lab	NAT, AMP
1219	Regulatable C. albicans optimised CRISPRi plasmid targetting C4_01750C (FBA1) (oRS 2059)	Shapiro lab	NAT, AMP
1220	Regulatable C. albicans optimised CRISPRi plasmid targetting C4_01750C (FBA1) (oRS 2060)	Shapiro lab	NAT, AMP
1221	Regulatable C. albicans optimised CRISPRi plasmid targetting C4_01750C (FBA1) (oRS 2061)	Shapiro lab	NAT, AMP
1222	Regulatable C. albicans optimised CRISPRi plasmid targetting C4_01750C (FBA1) (oRS 2062)	Shapiro lab	NAT, AMP

## Sheet: Table S4
Oligo Number (oRS)	Description	Sequence Lowercase = overhanging seguence for ligation (sequences are written in the 5' to 3' direction)	Resulting Amplicon size from paired primers
308	RT-qPCR forward primer for ACT1 housekeeping gene	GTTGGTGATGAAGCCCAATCC	148 bp (paired with oRS 309)
309	RT-qPCR reverse primer for ACT1 housekeeping gene	CTGGATGTTCTTCTGGAGCAAC	148 bp (paired with oRS 308)
416	sgRNA targetting C7_02030W (HSP90). From essential pool library this is sgRNA HSP90.2. Forward (F) and Reverse (R) sequence for duplexing	F - cgaTGGCAACCAACGGAGACCAC R - aacGTGGTCTCCGTTGGTTGCCA	N/A
835	Sanger sequencing primer set paired with oRS 836. Also used to validate cloning of the sgRNA sequence into the CRISPRi plasmid. Paired with the forward sequence of the sgRNA.	CCAACTTAATCGCCTTGCAG	1089 bp (oRS 836 pairing), 354 bp (sgRNA cloning validation)
836	Sanger sequencing primer set paired with oRS 835. Also used to validate cloning of the sgRNA sequence into the CRISPRi plasmid. Paired with the reverse sequence of the sgRNA.	CTTGACACGACCTTGGAGTG	1089 bp (oRS 836 pairing), 764 bp (sgRNA cloning validation)
900	Reverse primer used to validat proper integration of the CRISPRi plasmid in the C. albicans genome. This a sequence unique to the plasmid. Paired with the primer oRS 901	CCAGTTTGGAACAAGAGTCC	1,421 bp (paired with oRS 901)
901	Forward primer used to validat proper integration of the CRISPRi plasmid in the C. albicans genome. This a sequence unique to the genome of C. albicans in a region beside the NEUT5L sequence. Paired with the primer oRS 900	TAGCAACAAGTGTGAAAGTG	1,421 bp (paired with oRS 900)
949	Reverse primer used to validate cloning of the sgRNA sequence into the CRISPRi plasmid. Paired with the forward sequence of the sgRNA.	TGAGTCGTATTACAATTCAC	420 bp (sgRNA cloning validation)
950	Reverse primer used to validate cloning of the sgRNA sequence into the CRISPRi plasmid. Paired with the forward sequence of the sgRNA .	GTCGTATTACAATTCACTGG	417 bp (sgRNA cloning validation)
1088	RT-qPCR forward primer for Hsp90	CGAACCATCCAACTTTGCCC	124 bp (paired with oRS 1089)
1089	RT-qPCR reverse primer for Hsp90	TGGTTCGTCAGTTGAGGCAG	124 bp (paired with oRS 1088)
1220	sgRNA targetting C1_07380C (KSP1). Forward (F) and Reverse (R) sequence for duplexing.	F- cgaGAATAGTGTGAGTGATTAAT R- aacATTAATCACTCACACTATTC	N/A
1255	RT-qPCR forward primer for KSP1	TACGGTTTAGTGTCAGTCGCC	138 bp (paired with oRS 1256)
1256	RT-qPCR forward primer for KSP1	TTTCGCAGGACTTGAGGATGG	138 bp (paired with oRS 1255)
1342	RT-qPCR forward primer for dCas9	CTGTCTTGGTCGTGGCTAAA	93 bp (paired with oRS 1343)
1343	RT-qPCR reverse primer for dCas9	ATGAACGCTCCATGATGGTAATA	93 bp (paired with oRS 1342)
1506	sgRNA targetting C3_01080W (MRPL33). From essential pool library this is sgRNA 222. Forward (F) and Reverse (R) sequence for duplexing	F - cgaCAACGTTAAGGAAGGAAGGA R - aacTCCTTCCTTCCTTAACGTTG	N/A
1507	sgRNA targetting C3_01080W (MRPL33). From essential pool library this is sgRNA 223. Forward (F) and Reverse (R) sequence for duplexing	F - cgaTCCCGGACAACACCCAAAAC R - aacGTTTTGGGTGTTGTCCGGGA	N/A
1508	sgRNA targetting C4_00560C (MMM1). From essential pool library this is sgRNA 265. Forward (F) and Reverse (R) sequence for duplexing	F - cgaTAGTGCCAGAGATTTCACAG R - aacCTGTGAAATCTCTGGCACTA	N/A
1509	sgRNA targetting C4_00560C (MMM1). From essential pool library this is sgRNA 268. Forward (F) and Reverse (R) sequence for duplexing	F - cgaCCAGAGATTTCACAGTGGGG R - aacCCCCACTGTGAAATCTCTGG	N/A
1510	sgRNA targetting C4_01150W (ASK1). From essential pool library this is sgRNA 274. Forward (F) and Reverse (R) sequence for duplexing	F - cgaTGGTGGTAAATGGTTAGTGG R - aacCCACTAACCATTTACCACCA	N/A
1511	sgRNA targetting C4_01150W (ASK1). From essential pool library this is sgRNA 275. Forward (F) and Reverse (R) sequence for duplexing	F - cgaAAATGGTTAGTGGTGGTAAG R - aacCTTACCACCACTAACCATTT	N/A
1812	sgRNA targetting C7_03000C. From essential pool library this is sgRNA 402. Forward (F) and Reverse (R) sequence for duplexing	F - cgaTTTCTTTCTATTTGCTTTCT R - aacAGAAAGCAAATAGAAAGAAA	N/A
1813	sgRNA targetting C7_03000C. From essential pool library this is sgRNA 403. Forward (F) and Reverse (R) sequence for duplexing	F - cgaATGTTGTTGAGATTTGGATT R - aacAATCCAAATCTCAACAACAT	N/A
1814	sgRNA targetting C4_00890 (ARO1). From essential pool library this is sgRNA 269. Forward (F) and Reverse (R) sequence for duplexing	F - cgaCGATGAGCCATGACCAACAA R - aacTTGTTGGTCATGGCTCATCG"	N/A
1815	sgRNA targetting C4_00890 (ARO1). From essential pool library this is sgRNA 272. Forward (F) and Reverse (R) sequence for duplexing	F - cgaACGGTGTTTGGTTTCTCGTT R - aacAACGAGAAACCAAACACCGT	N/A
1836	Forward primer for amplification of the sgRNA region in the plasmid. Primer contains illumina adapter sequences (capital letters) to incorporate the index primers. Paired with 1838	TCGTCGGCAGCGTCAGATGTGTATAAGAGACAGNNNNNagttgataacggactagcct	224 bp (paired with oRS 1836)
1838	Forward primer for amplification of the sgRNA region in the plasmid. Primer contains illumina adapter sequences (capital letters) to incorporate the index primers. Paired with 1836	GTCTCGTGGGCTCGGAGATGTGTATAAGAGACAGNNaatatgttttcgcagcgttc	224 bp (paired with oRS 1838)
1848	sgRNA targetting C4_00890 (ARO1). From essential pool library this is sgRNA 270. Forward (F) and Reverse (R) sequence for duplexing	F - cgaACGATGAGCCATGACCAACA R - aacTGTTGGTCATGGCTCATCGT	N/A
1849	sgRNA targetting C4_00890 (ARO1). From essential pool library this is sgRNA 271. Forward (F) and Reverse (R) sequence for duplexing	F - cgaTTTCTCCATCAAACGGTGTT R - aacAACACCGTTTGATGGAGAAA	N/A
1850	sgRNA targetting C7_03000C. From essential pool library this is sgRNA 401. Forward (F) and Reverse (R) sequence for duplexing	F - cgaTGTTGTGTGTGTGTGTCAAA R - aacTTTGACACACACACACAACA	N/A
2053	sgRNA targetting C4_01150W (ASK1). From essential pool library this is sgRNA 273. Forward (F) and Reverse (R) sequence for duplexing	F - cgaGTGTGTTTAAGGGATGCTGG R - aacCCAGCATCCCTTAAACACAC	N/A
2054	sgRNA targetting C4_01150W (ASK1). From essential pool library this is sgRNA 274. Forward (F) and Reverse (R) sequence for duplexing	F - cgaTTAGTGGTGGTAAGTGGAGG R - aacCCTCCACTTACCACCACTAA	N/A
2055	sgRNA targetting C4_00560C (MMM1). From essential pool library this is sgRNA 266. Forward (F) and Reverse (R) sequence for duplexing	F - cgaAGTGCCAGAGATTTCACAGT R - aacACTGTGAAATCTCTGGCACT	N/A
2056	sgRNA targetting C4_00560C (MMM1). From essential pool library this is sgRNA 267. Forward (F) and Reverse (R) sequence for duplexing	F - cgaTGCCAGAGATTTCACAGTGG R - aacCCACTGTGAAATCTCTGGCA	N/A
2057	sgRNA targetting C3_01080W (MRPL33). From essential pool library this is sgRNA 221. Forward (F) and Reverse (R) sequence for duplexing	F - cgaCGAAAGCTCAACGTTAAGGA R - aacTCCTTAACGTTGAGCTTTCG	N/A
2058	sgRNA targetting C3_01080W (MRPL33). From essential pool library this is sgRNA 224. Forward (F) and Reverse (R) sequence for duplexing	F - cgaGGTTTGCAAAAACACATTTA R - aacTAAATGTGTTTTTGCAAACC	N/A
2059	sgRNA targetting C4_01750C (FBA1). From essential pool library this is sgRNA 277. Forward (F) and Reverse (R) sequence for duplexing	F - cgaGTAGGCAAGCAGGCAGAAAG R - aacCTTTCTGCCTGCTTGCCTAC	N/A
2060	sgRNA targetting C4_01750C (FBA1). From essential pool library this is sgRNA 278. Forward (F) and Reverse (R) sequence for duplexing	F - cgaTAGGCAAGCAGGCAGAAAGT R - aacACTTTCTGCCTGCTTGCCTA	N/A
2061	sgRNA targetting C4_01750C (FBA1). From essential pool library this is sgRNA 279. Forward (F) and Reverse (R) sequence for duplexing	F - cgaTTCTGCCTGCTTGCCTACGT R - aacACGTAGGCAAGCAGGCAGAA	N/A
2062	sgRNA targetting C4_01750C (FBA1). From essential pool library this is sgRNA 280. Forward (F) and Reverse (R) sequence for duplexing	F - cgaTTTCTGCCTGCTTGCCTACG R - aacCGTAGGCAAGCAGGCAGAAA	N/A

## Sheet: Table S5
Media type/Environmental stressor	Condition tested	Recipe	Final testing concentrations
Yeast peptone Dextrose (YPD) Broth	Fungal transformation media	10 g of yeast extract 20 g of peptone 950 mL of water 50 mL of 40% glucose (final concentration 2%)	N/A
Luria-Bertani (LB) Broth (Miller)	Bacterial transformation media	25 g of LB broth mix 1 L of water	N/A
YPD agar plates with nourseothricin and anhydrotetracycline	Fungal transformation media	10 g of yeast extract 20 g of peptone 950 mL of water 50 mL of 40% glucose (final concentration 2%) 1 mL of 250 mg/mL nourseothricin 50 μL of 5 mg/mL anhydrotetracycline	250 μg/mL nourseothricin 250 ng/mL anhydrotetracycline
LB agar plates with ampicillin and nourseothricin	Bacterial transformation media	25 g of LB broth mix 1 L of water 1 mL of 100 mg/mL ampicillin 200 μL of 250 mg/mL nourseothricin	100 μg/mL ampicillin 50 μg/mL nourseothricin
Antifungal Drug (Azoles)	Fluconazole	9 mL of YP 2.22x (final concentration 1x) 1 mL of 40% glucose (final concentration 2%) Variable volume of 50 mg/mL fluconazole 10 mL of water	WT & ERB 0.1 µg/mL ARB 4 µg/mL
Antifungal Drug (Echinocandins)	Caspofungin	9 mL of YP 2.22x (final concentration 1x) 1 mL of 40% glucose (final concentration 2%) Variable volume of 5 mg/mL Caspofungin 10 mL of water	WT & ARB 2 ng/mL ERB 140 ng/mL
Membrane stress	SDS	9 mL of YP 2.22x (final concentration 1x) 1 mL of 40% glucose (final concentration 2%) 10 mL of water 60 µl of 10% SDS (final concentration 0.03%)	0.03% SDS
Salt stress	NaCl	9 mL of YP 2.22x (final concentration 1x) 1 mL of 40% glucose (final concentration 2%) 10 mL of NaCl 2M (final concentration 1M)	1 M NaCl
Osmotic stress	Sorbitol	9 mL of YP 2.22x (final concentration 1x) 1 mL of 40% glucose (final concentration 2%) 10 mL of Sorbitol 2M (final concentration 1M)	1 M Sorbitol
DNA damaging agent	MMS	9 mL of YP 2.22x (final concentration 1x) 1 mL of 40% glucose (final concentration 2%) 10 mL of water 60 ul of 10% MMS (final concentration 0.005%)	0.005% MMS
DNA and RNA disrupter	5-FC (5-fluorocytosine)	9 mL of YP 2.22x (final concentration 1x) 1 mL of 40% glucose (final concentration 2%) 10 mL of water 40 µl of 1 mg/mL 5-FC (final concentration 2 µg/mL)	2 μg/ml 5-FC
ER stress	Tunicamycin	9 mL of YP 2.22x (final concentration 1x) 1 mL of 40% glucose (final concentration 2%) 10 mL of water 20 μL of 0.625 mg/mL (final concentration 0.625 μg/ml)	0.625 μg/ml Tunicamycin
Alternative carbon source	Lactate	9 mL of YP 2.22x (final concentration 1x) 1 mL of 40% lactate (final concentration 2%) 10 mL of water	2% Lactate
Alternative carbon source	Acetate	9 mL of YP 2.22x (final concentration 1x) 1 mL of 40% acetate (final concentration 2%) 10 mL of water	2% Acetate
Alternative carbon source	Glycerol	9 mL of YP 2.22x (final concentration 1x) 1 mL of 40% glycerol (final concentration 2%) 10 mL of water	2% Glycerol
pH fluctuations	Acidic pH	9 mL of YP 2.22x (final concentration 1x) 1 mL of 40% glycerol (final concentration 2%) 10 mL of water Add HCL until reaching a pH of 4	pH of 4
Control condition (YPD)	Control (base media)	9 mL of YP 2.22x (final concentration 1x) 1 mL of 40% glucose (final concentration 2%) 10 mL of water	2% Glucose

## Sheet: Table_S6
	Gene	alias	SgRNA	Barcode	PAM	control	strand	atg_dist	B_mismatch	dist_TSS	abs_TSS_dist	GC_content	snp_fRS1	snp_hom_fRS1	snp_fRS242	snp_hom_fRS242	snp_fRS246	snp_hom_fRS246	WT_0_T0_T0	WT_T1_NoATC_1	WT_T1_NoATC_2	WT_T1_NoATC_3	WT_T1_ATC_1	WT_T1_ATC_2	WT_T1_ATC_3	WT_T2_NoATC_1	WT_T2_NoATC_2	WT_T2_NoATC_3	WT_T2_ATC_1	WT_T2_ATC_2	WT_T2_ATC_3	WT_T3_NoATC_1	WT_T3_NoATC_2	WT_T3_NoATC_3	WT_T3_ATC_1	WT_T3_ATC_2	WT_T3_ATC_3	freq_WT_0_T0_T0	freq_WT_T1_NoATC_1	freq_WT_T1_NoATC_2	freq_WT_T1_NoATC_3	freq_WT_T1_ATC_1	freq_WT_T1_ATC_2	freq_WT_T1_ATC_3	freq_WT_T2_NoATC_1	freq_WT_T2_NoATC_2	freq_WT_T2_NoATC_3	freq_WT_T2_ATC_1	freq_WT_T2_ATC_2
0	C1_00220W	PHR2	1	TTGGCTTTCCTCCCCTTAAC	TGG	0	+	112	no	-9	9	50	0	0	0	0	0	0	176	177	168	148	148	178	137	177	184	133	164	139	146	272	313	314	445	243	332	0.000384	0.000413	0.000389	0.000411	0.000426	0.000383	0.000471	0.000475	0.000559	0.000488	0.000486	0.000472
1	C1_00220W	PHR2	2	TCCTTGAATTTCTTGGTAGA	AGG	0	-	45	no	58	58	35	0	0	0	0	0	0	362	374	369	337	316	378	247	320	318	263	258	241	293	477	559	529	774	437	641	0.000788	0.00087	0.000851	0.000931	0.000906	0.000812	0.000847	0.000857	0.000964	0.000961	0.000763	0.000817
2	C1_00220W	PHR2	3	CGATGATTCCTTGAATTTCT	TGG	0	-	38	no	65	65	35	0	0	0	0	0	0	15	20	16	10	13	13	7	19	12	8	11	10	10	36	39	15	44	18	28	3.47283e-05	4.87478e-05	3.90903e-05	3.03088e-05	4.00029e-05	2.99929e-05	2.73071e-05	5.33947e-05	3.92666e-05	3.2778e-05	3.5334e-05	3.71244e-05
3	C1_00220W	PHR2	4	CAACAGTAGCAGAATTGTAC	AGG	0	+	288	no	-185	185	40	0	0	0	0	0	0	160	164	195	147	125	119	111	168	114	101	120	101	128	282	239	208	319	223	255	0.000349	0.000383	0.000451	0.000408	0.00036	0.000257	0.000382	0.000451	0.000347	0.000371	0.000356	0.000344
4	C1_00400W	SVF1	5	TTAATGTCGCTTAGTGATGG	AGG	0	-	177	no	-89	89	40	0	0	0	0	0	0	212	194	170	169	175	208	141	163	154	103	162	152	191	222	274	246	429	236	343	0.000462	0.000453	0.000393	0.000468	0.000503	0.000448	0.000485	0.000438	0.000468	0.000379	0.00048	0.000516
5	C1_00400W	SVF1	6	AGTTTAATGTCGCTTAGTGA	TGG	0	-	174	no	-86	86	35	0	0	0	0	0	0	682	609	648	560	525	664	406	437	381	319	502	463	508	600	687	677	1364	795	1082	0.001482	0.001416	0.001492	0.001546	0.001503	0.001425	0.001389	0.001169	0.001154	0.001165	0.001481	0.001566
6	C1_00400W	SVF1	7	ATTAACAAAGGGTAAGGATC	AGG	0	-	94	no	-6	6	35	0	0	0	0	0	0	84	45	52	50	51	61	41	37	29	30	29	34	32	56	50	72	74	82	60	0.000184	0.000107	0.000122	0.000141	0.000149	0.000133	0.000143	0.000101	9.06153e-05	0.000113	8.83351e-05	0.000118
7	C1_00400W	SVF1	8	AGTGAGTACGACAAACAAAT	AGG	0	-	219	no	-131	131	35	0	0	0	0	0	0	1749	1640	1500	1268	1282	1707	1020	1215	935	804	1261	1068	1190	1463	1447	1569	2888	1940	2442	0.003798	0.003809	0.003451	0.003497	0.003666	0.003659	0.003485	0.003246	0.002827	0.002932	0.003716	0.003608
8	C1_00450C	C1_00450C	9	CAATATACCTTTATCTTGTG	AGG	0	-	54	no	-8	8	30	0	0	0	0	0	0	7	2	4	6	8	9	5	3	2	3		3	9	1	7	5	6	13	10	1.73641e-05	6.96397e-06	1.14972e-05	1.92874e-05	2.57161e-05	2.14235e-05	2.04803e-05	1.06789e-05	9.06153e-06	1.4568e-05	2.9445e-06	1.34998e-05
9	C1_00450C	C1_00450C	10	ATGGCTAAATGACGAATTCA	CGG	0	+	288	no	-242	242	35	0	0	0	0	0	0	497	465	455	341	379	515	301	388	393	286	385	387	363	714	675	672	882	618	697	0.001081	0.001082	0.001049	0.000942	0.001086	0.001105	0.001031	0.001039	0.00119	0.001045	0.001137	0.001309
10	C1_00450C	C1_00450C	11	TGTCTCTGTCTCTAGCTTTC	AGG	0	-	233	no	-187	187	45	0	0	0	0	0	0	632	619	619	501	501	614	399	570	506	388	501	440	480	857	849	785	1091	783	957	0.001374	0.001439	0.001426	0.001383	0.001434	0.001318	0.001365	0.001524	0.001531	0.001417	0.001478	0.001488
11	C1_00450C	C1_00450C	12	TGAAAAACCTCACAAGATAA	AGG	0	+	64	no	-18	18	30	0	0	0	0	0	0	1006	915	950	785	837	1046	636	803	689	590	722	661	753	1165	1286	1303	1720	1168	1554	0.002186	0.002126	0.002187	0.002166	0.002394	0.002243	0.002174	0.002146	0.002084	0.002152	0.002129	0.002234
12	C1_00510W	C1_00510W	13	CATTGTATTTCGTTCATCCT	CGG	0	+	157	no	-93	93	35	0	0	0	0	0	0	85	62	70	55	86	95	38	49	71	35	58	43	66	93	90	91	192	97	111	0.000187	0.000146	0.000163	0.000154	0.000249	0.000206	0.000133	0.000133	0.000217	0.000131	0.000174	0.000148
13	C1_00510W	C1_00510W	14	ATCTCGTTCCCCAACAAGTT	AGG	0	+	133	no	-69	69	45	0	0	0	0	0	0	749	653	706	585	574	793	500	344	269	242	505	536	537	348	329	332	1352	880	1159	0.001628	0.001518	0.001626	0.001615	0.001643	0.001701	0.00171	0.000921	0.000816	0.000885	0.00149	0.001812
14	C1_00510W	C1_00510W	15	TCTCGTTCCCCAACAAGTTA	GGG	0	+	132	no	-68	68	45	0	0	0	0	0	0	1252	871	1002	759	742	1031	694	361	304	312	745	602	763	348	369	385	1901	1140	1357	0.00272	0.002024	0.002306	0.002094	0.002123	0.002211	0.002372	0.000966	0.000921	0.00114	0.002197	0.002035
15	C1_00510W	C1_00510W	16	TGTTGGGGAACGAGATTCCG	AGG	0	-	137	no	-73	73	55	0	0	0	0	0	0	2996	2905	2877	2506	2351	3130	2078	2935	2702	2235	2272	1967	2364	5577	5543	5798	6136	3947	4970	0.006505	0.006746	0.006618	0.006908	0.00672	0.006708	0.007096	0.007838	0.008164	0.008144	0.006693	0.006642
16	C1_01070C	KRP1	17	CATATGTTTCCAATAGTATC	GGG	0	-	197	no	-90	90	30	0	0	0	0	0	0	4	5		2	2	2	2					6					5	3	5	1.08526e-05	1.39279e-05	2.29943e-06	8.26603e-06	8.57204e-06	6.42705e-06	1.02402e-05	2.66974e-06	3.02051e-06	3.64201e-06	2.9445e-06	2.36246e-05
17	C1_01070C	KRP1	18	GTATGGGTATTCAAAGTTGT	GGG	0	-	63	no	44	44	35	0	0	0	0	0	0	642	604	604	508	475	631	445	552	513	420	468	440	504	919	974	1020	1195	733	977	0.001396	0.001404	0.001391	0.001402	0.00136	0.001354	0.001522	0.001476	0.001553	0.001533	0.001381	0.001488
18	C1_01070C	KRP1	19	TGTATGGGTATTCAAAGTTG	TGG	0	-	62	no	45	45	35	0	0	0	0	0	0	3123	2788	2906	2396	2338	3129	1955	2600	2336	1928	2251	2042	2285	4023	4212	4400	6038	3667	4750	0.006781	0.006474	0.006684	0.006605	0.006683	0.006706	0.006677	0.006944	0.007059	0.007025	0.006631	0.006895
19	C1_01070C	KRP1	20	ATATAAGAACCCGATACTAT	TGG	0	+	209	no	-102	102	30	0	0	0	0	0	0														1						2.17052e-06	2.32132e-06	2.29943e-06	2.75534e-06	2.85735e-06	2.14235e-06	3.41339e-06	2.66974e-06	3.02051e-06	3.64201e-06	2.9445e-06	3.37495e-06
20	C1_01600W	MRP20	21	ATCTTGAAGGGAGGAGTAGA	AGG	0	+	252	no	-223	223	45	0	0	0	0	0	0	1073	1005	868	813	772	1089	656	809	752	566	776	664	709	1339	1362	1367	1996	1099	1542	0.002331	0.002335	0.001998	0.002243	0.002209	0.002335	0.002243	0.002162	0.002274	0.002065	0.002288	0.002244
21	C1_01600W	MRP20	22	TTGAAGGGAGGAGTAGAAGG	TGG	0	+	249	no	-220	220	50	0	0	0	0	0	0	1411	1235	1266	956	1021	1279	891	1009	950	790	971	838	947	1570	1728	1834	2469	1614	2134	0.003065	0.002869	0.002913	0.002637	0.00292	0.002742	0.003045	0.002696	0.002873	0.002881	0.002862	0.002832
22	C1_01600W	MRP20	23	GAGGAGTAGAAGGTGGTGCA	AGG	0	+	242	no	-213	213	55	0	0	0	0	0	0	223	239	210	213	195	266	173	187	159	150	213	159	194	317	349	309	511	344	370	0.000486	0.000557	0.000485	0.00059	0.00056	0.000572	0.000594	0.000502	0.000483	0.00055	0.00063	0.00054
23	C1_01600W	MRP20	24	GTGGTGCAAGGTTGATTGAA	TGG	0	+	230	no	-201	201	45	0	0	0	0	0	0	619	527	496	426	426	618	354	483	413	327	467	374	426	675	646	647	1018	666	941	0.001346	0.001226	0.001143	0.001177	0.00122	0.001326	0.001212	0.001292	0.00125	0.001195	0.001378	0.001266
24	C1_01950C	C1_01950C	25	ATACTTGAGGTAGTGTATGG	AGG	0	+	142	no	-115	115	40	0	0	0	0	0	0	1092	1033	964	871	821	1138	652	776	734	606	775	664	804	1079	1274	1256	2038	1246	1735	0.002372	0.0024	0.002219	0.002403	0.002349	0.00244	0.002229	0.002074	0.00222	0.002211	0.002285	0.002244
25	C1_01950C	C1_01950C	26	CGACGATCGACTTCCGTCTC	AGG	0	+	221	no	-194	194	60	0	0	0	0	0	0	5	2	5	2	2	10	2	3	5	3		4	4	4	5	3	6	1		1.30231e-05	6.96397e-06	1.37966e-05	8.26603e-06	8.57204e-06	2.35659e-05	1.02402e-05	1.06789e-05	1.81231e-05	1.4568e-05	2.9445e-06	1.68747e-05
26	C1_01950C	C1_01950C	27	CTCAGGATTGTCGTGCATTC	CGG	0	+	204	no	-177	177	50	0	0	0	0	0	0	450	507	521	436	335	487	337	413	410	327	344	313	346	616	649	729	920	569	753	0.000979	0.001179	0.0012	0.001204	0.00096	0.001045	0.001154	0.001105	0.001241	0.001195	0.001016	0.00106
27	C1_01950C	C1_01950C	28	GATTGTCGTGCATTCCGGCT	AGG	0	+	199	no	-172	172	55	0	0	0	0	0	0	209	181	197	165	156	223	131	160	116	134	180	118	143	286	239	279	414	263	276	0.000456	0.000422	0.000455	0.000457	0.000449	0.00048	0.000451	0.00043	0.000353	0.000492	0.000533	0.000402
28	C1_02420C	GSC1	29	ATATTTAAAAAAAAAGAAGG	GGG	0	-	61	no	312	312	15	0	0	0	0	0	0	29	23	26	14	17	24	13	16	18	19	23	17	16	36	47	25	43	34	33	6.51155e-05	5.57117e-05	6.20847e-05	4.13302e-05	5.14322e-05	5.35588e-05	4.77874e-05	4.53855e-05	5.73897e-05	7.28401e-05	7.0668e-05	6.0749e-05
29	C1_02420C	GSC1	30	TTAGTATATCAGTTGGGTGT	TGG	0	-	32	no	341	341	35	0	0	0	0	0	0	668	551	564	443	491	571	379	515	436	330	469	407	456	766	816	800	1147	771	855	0.001452	0.001281	0.001299	0.001223	0.001406	0.001225	0.001297	0.001378	0.00132	0.001206	0.001384	0.001377
30	C1_02420C	GSC1	31	GATAAGTTAGTATATCAGTT	GGG	0	-	26	no	347	347	25	0	0	0	0	0	0	310	263	279	247	234	289	184	238	176	182	218	190	215	337	328	353	482	337	406	0.000675	0.000613	0.000644	0.000683	0.000671	0.000621	0.000631	0.000638	0.000535	0.000666	0.000645	0.000645
31	C1_02420C	GSC1	32	AGATAAGTTAGTATATCAGT	TGG	0	-	25	no	348	348	25	0	0	0	0	0	0	169	142	153	152	131	160	98	136	101	104	109	104	122	209	204	214	305	191	239	0.000369	0.000332	0.000354	0.000422	0.000377	0.000345	0.000338	0.000366	0.000308	0.000382	0.000324	0.000354
32	C1_02510W	C1_02510W	33	TGAACTTAGAGTCCGTATAC	TGG	0	+	144	no	-83	83	40	0	0	0	0	0	0	755	725	725	584	546	751	459	575	424	403	584	528	570	698	830	808	1572	806	1106	0.001641	0.001685	0.001669	0.001612	0.001563	0.001611	0.00157	0.001538	0.001284	0.001471	0.001723	0.001785
33	C1_02510W	C1_02510W	34	ATTGACGTGTTCATAAAATG	TGG	0	-	163	no	-102	102	30	0	0	0	0	0	0	71	57	72	47	48	75	40	37	33	44	43	50	67	73	75	87	117	82	101	0.000156	0.000135	0.000168	0.000132	0.00014	0.000163	0.00014	0.000101	0.000103	0.000164	0.00013	0.000172
34	C1_02510W	C1_02510W	35	AGTTACGATCTTTGTTGTTG	TGG	0	-	26	no	35	35	35	0	0	0	0	0	0	2432	2159	2336	1887	1830	2426	1547	1963	1869	1613	1756	1532	1859	3292	3466	3624	4716	2662	3588	0.005281	0.005014	0.005374	0.005202	0.005232	0.005199	0.005284	0.005243	0.005648	0.005878	0.005173	0.005174
35	C1_02510W	C1_02510W	36	ATATTGAAGGGGTTGGTTAT	TGG	0	-	280	no	-219	219	35	0	0	0	0	0	0	165	106	113	116	136	153	66	114	110	75	125	79	97	172	220	204	310	127	198	0.00036	0.000248	0.000262	0.000322	0.000391	0.00033	0.000229	0.000307	0.000335	0.000277	0.000371	0.00027
36	C1_02620C	HOM6	37	CTACTGTTGTTGTTGCGTCT	GGG	0	+	168	no	-138	138	45	0	0	1	0	1	1				2									1							2.17052e-06	2.32132e-06	2.29943e-06	8.26603e-06	2.85735e-06	2.14235e-06	3.41339e-06	2.66974e-06	3.02051e-06	3.64201e-06	2.9445e-06	3.37495e-06
37	C1_02620C	HOM6	38	TACTGTTGTTGTTGCGTCTG	GGG	0	+	167	no	-137	137	45	0	0	0	0	0	0	1776	1695	1759	1431	1328	1845	1068	1538	1453	1127	1372	1227	1421	2462	2658	2653	3351	2087	2830	0.003857	0.003937	0.004047	0.003946	0.003797	0.003955	0.003649	0.004109	0.004392	0.004108	0.004043	0.004144
38	C1_02620C	HOM6	39	TGCGTCTGGGGCGCCTTTAC	CGG	0	+	155	no	-125	125	65	0	0	0	0	0	0	399	365	398	347	293	402	252	336	310	255	293	264	315	532	568	522	891	448	666	0.000868	0.00085	0.000917	0.000959	0.00084	0.000863	0.000864	0.0009	0.000939	0.000932	0.000866	0.000894
39	C1_02620C	HOM6	40	ACTCCTTCCGATCTTGTTAC	CGG	0	-	133	no	-103	103	45	0	0	0	0	0	0	2581	2274	2343	1903	1828	2692	1589	1909	1921	1381	1562	1374	1701	2977	2902	2938	3503	2169	2870	0.005604	0.005281	0.00539	0.005246	0.005226	0.005769	0.005427	0.005099	0.005805	0.005033	0.004602	0.004641
40	C1_02660C	MGM101	41	TGATAAATTACACAGCTTTA	AGG	0	+	151	no	-96	96	25	0	0	0	0	0	0	2702	2645	2625	2383	2205	2773	1794	2552	2173	1692	2064	1879	2134	3626	3671	3903	4932	3219	4009	0.005867	0.006142	0.006038	0.006569	0.006303	0.005943	0.006127	0.006816	0.006567	0.006166	0.00608	0.006345
41	C1_02660C	MGM101	42	TAAATTACACAGCTTTAAGG	TGG	0	+	148	no	-93	93	30	0	0	0	0	0	0	428	436	433	299	316	469	270	425	349	298	331	235	276	563	585	677	718	486	687	0.000931	0.001014	0.000998	0.000827	0.000906	0.001007	0.000925	0.001137	0.001057	0.001089	0.000978	0.000796
42	C1_02660C	MGM101	43	TAAGGTGGTGTCTAACATCT	TGG	0	+	133	no	-78	78	40	0	0	0	0	0	0	209	183	198	163	194	224	149	203	190	143	178	139	140	235	269	267	376	229	349	0.000456	0.000427	0.000458	0.000452	0.000557	0.000482	0.000512	0.000545	0.000577	0.000524	0.000527	0.000472
43	C1_02660C	MGM101	44	AATAACAAATGAGTTGGCGA	CGG	0	-	49	no	6	6	35	0	0	0	0	0	0	758	629	670	533	475	716	385	586	510	421	487	420	480	792	864	893	1211	746	1099	0.001647	0.001462	0.001543	0.001471	0.00136	0.001536	0.001318	0.001567	0.001543	0.001537	0.001437	0.001421
44	C1_02960C	C1_02960C	45	TGATTGTTATAGAACAATGG	TGG	0	-	202	no	-136	136	30	0	0	0	0	0	0	270	249	291	232	216	284	189	228	194	169	210	175	239	343	321	432	540	317	449	0.000588	0.00058	0.000671	0.000642	0.00062	0.000611	0.000649	0.000611	0.000589	0.000619	0.000621	0.000594
45	C1_02960C	C1_02960C	46	CTTTGATTGTTATAGAACAA	TGG	0	-	199	no	-133	133	25	0	0	0	0	0	0							2						1	1				1		2.17052e-06	2.32132e-06	2.29943e-06	2.75534e-06	2.85735e-06	2.14235e-06	1.02402e-05	2.66974e-06	3.02051e-06	3.64201e-06	2.9445e-06	3.37495e-06
46	C1_02960C	C1_02960C	47	AAAAGAATCATTAACGGGGA	TGG	0	+	56	no	10	10	35	0	0	0	0	0	0	1259	1248	1177	971	899	1266	759	1075	802	710	873	776	945	1391	1323	1545	2254	1505	1737	0.002735	0.002899	0.002709	0.002678	0.002572	0.002714	0.002594	0.002873	0.002425	0.002589	0.002573	0.002622
47	C1_02960C	C1_02960C	48	AAAGAATCATTAACGGGGAT	GGG	0	+	55	no	11	11	35	0	0	0	0	0	0	3411	3299	3355	2741	2637	3558	2309	2990	2590	2279	2608	2303	2535	4562	4771	5032	6702	4236	5318	0.007406	0.00766	0.007717	0.007555	0.007538	0.007625	0.007885	0.007985	0.007826	0.008304	0.007682	0.007776
48	C1_03280W	C1_03280W	49	TCTTGCCTATAAGTTGAAGA	AGG	0	+	177	no	-126	126	35	0	0	0	0	0	0	673	651	659	556	471	703	482	517	528	441	495	425	521	802	881	821	1277	789	1108	0.001463	0.001514	0.001518	0.001535	0.001349	0.001508	0.001649	0.001383	0.001598	0.00161	0.00146	0.001438
49	C1_03280W	C1_03280W	50	CTTGCCTATAAGTTGAAGAA	GGG	0	+	176	no	-125	125	35	0	0	0	0	0	0	46	58	50	29	48	83	34	27	17	17	37	25	28	22	24	24	61	69	80	0.000102	0.000137	0.000117	8.26603e-05	0.00014	0.00018	0.000119	7.47526e-05	5.43692e-05	6.55561e-05	0.000112	8.77486e-05
50	C1_03280W	C1_03280W	51	AAGGGAAACAAAAAGTAGTG	TGG	0	+	158	no	-107	107	35	0	0	0	0	0	0	2595	2521	2579	2145	2001	2671	1692	2081	1945	1605	2055	1708	1927	2876	3015	3269	5006	2905	3889	0.005635	0.005854	0.005933	0.005913	0.00572	0.005724	0.005779	0.005558	0.005878	0.005849	0.006054	0.005768
51	C1_03280W	C1_03280W	52	ATAGGCATACGTACTAACAG	TGG	0	-	252	no	-201	201	40	0	0	0	0	0	0	411	333	374	344	321	424	289	292	272	224	313	249	319	396	493	470	777	492	669	0.000894	0.000775	0.000862	0.000951	0.00092	0.00091	0.00099	0.000782	0.000825	0.000819	0.000925	0.000844
52	C1_03380W	TPS2	53	TAACAGATTCGAAGGTTCGC	CGG	0	-	203	no	-151	151	45	0	0	0	0	0	0	629	682	634	498	496	709	414	597	504	465	483	423	488	923	970	988	1241	864	1070	0.001367	0.001585	0.00146	0.001375	0.00142	0.001521	0.001417	0.001597	0.001525	0.001697	0.001425	0.001431
53	C1_03380W	TPS2	54	TTACATATGGCGTGCCCCCT	AGG	0	+	272	no	-220	220	55	0	0	0	0	0	0	38	20	34	27	24	25	21	37	26	17	24	9	19	40	38	45	67	44	43	8.46501e-05	4.87478e-05	8.04801e-05	7.71497e-05	7.14337e-05	5.57011e-05	7.50946e-05	0.000101	8.15537e-05	6.55561e-05	7.36126e-05	3.37495e-05
54	C1_03380W	TPS2	55	GTACCGACAATTGATATTTA	TGG	0	-	119	no	-67	67	30	0	0	0	0	0	0	477	445	500	394	429	494	352	529	428	353	399	350	412	703	740	876	963	669	836	0.001038	0.001035	0.001152	0.001088	0.001229	0.00106	0.001205	0.001415	0.001296	0.001289	0.001178	0.001185
55	C1_03380W	TPS2	56	AAACGAAAGTCAACTAAAAA	GGG	0	-	77	no	-25	25	25	0	0	0	0	0	0	336	349	313	348	294	386	214	330	285	236	300	221	246	480	491	456	623	441	532	0.000731	0.000812	0.000722	0.000962	0.000843	0.000829	0.000734	0.000884	0.000864	0.000863	0.000886	0.000749
56	C1_03980W	SPC19	57	TAATAAGATGATATTGTGTG	TGG	0	-	91	no	3	3	25	0	0	0	0	0	0	81	65	67	61	43	75	46	93	39	52	52	39	53	110	94	94	114	114	107	0.000178	0.000153	0.000156	0.000171	0.000126	0.000163	0.00016	0.000251	0.000121	0.000193	0.000156	0.000135
57	C1_03980W	SPC19	58	TTGAAAAAGGTCTAAGTAGA	TGG	0	-	63	no	31	31	30	0	0	0	0	0	0	223	148	169	143	171	204	130	194	157	98	127	145	182	267	306	312	393	210	309	0.000486	0.000346	0.000391	0.000397	0.000491	0.000439	0.000447	0.000521	0.000477	0.000361	0.000377	0.000493
58	C1_03980W	SPC19	59	ATATATGTATTAATTGAAAA	AGG	0	-	50	no	44	44	10	0	0	0	0	0	0	72	80	96	80	70	92	46	87	68	68	73	68	73	103	119	142	176	112	138	0.000158	0.000188	0.000223	0.000223	0.000203	0.000199	0.00016	0.000235	0.000208	0.000251	0.000218	0.000233
59	C1_03980W	SPC19	60	TATATCTATGTGTATCTTAA	GGG	0	-	21	no	73	73	20	0	0	0	0	0	0	2305	2227	2114	1813	1774	2307	1470	2068	1634	1445	1695	1557	1701	2916	3127	3230	4319	2678	3520	0.005005	0.005172	0.004863	0.004998	0.005072	0.004945	0.005021	0.005524	0.004939	0.005266	0.004994	0.005258
60	C1_05500W	RSM22	61	TAAGACACAAAAGTGGAAAC	AGG	0	+	94	no			35	1	0	1	0	1	1	110	106	98	80	79	81	67	100	61	57	98	65	73	70	86	116	157	112	140	0.000241	0.000248	0.000228	0.000223	0.000229	0.000176	0.000232	0.00027	0.000187	0.000211	0.000292	0.000223
61	C1_05500W	RSM22	62	ACACAAAAGTGGAAACAGGA	AGG	0	+	90	no			40	0	0	0	0	0	0	414	348	389	314	294	391	245	205	209	163	245	240	246	105	121	112	643	395	483	0.000901	0.00081	0.000897	0.000868	0.000843	0.00084	0.00084	0.00055	0.000634	0.000597	0.000724	0.000813
62	C1_05500W	RSM22	63	GTCGTTGTTTCTCATTTGGT	TGG	0	+	209	no			40	0	0	0	0	0	0	1227	1228	1199	973	980	1245	813	1187	1006	789	918	756	977	1649	1930	1977	2529	1524	2020	0.002665	0.002853	0.002759	0.002684	0.002803	0.002669	0.002778	0.003172	0.003042	0.002877	0.002706	0.002555
63	C1_05500W	RSM22	64	TCTCATTTGGTTGGTTGGTC	TGG	0	+	200	no			45	0	0	0	0	0	0	62	67	71	40	44	49	38	55	48	39	40	47	36	73	87	117	110	54	123	0.000137	0.000158	0.000166	0.000113	0.000129	0.000107	0.000133	0.00015	0.000148	0.000146	0.000121	0.000162
64	C1_05560W	RIB4	65	ATAAAACATATCATCATAAC	TGG	0	+	273	no	427	427	20	0	0	0	0	0	0	414	502	404	343	365	466	287	402	343	214	374	293	296	664	621	689	815	402	615	0.000901	0.001168	0.000931	0.000948	0.001046	0.001	0.000983	0.001076	0.001039	0.000783	0.001104	0.000992
65	C1_05560W	RIB4	66	TTCTTCGTTGTCGTCGTTGT	TGG	0	+	64	no	636	636	45	0	0	0	0	0	0	703	750	661	592	625	775	451	635	544	464	536	465	541	991	1014	977	1249	945	1195	0.001528	0.001743	0.001522	0.001634	0.001789	0.001662	0.001543	0.001698	0.001646	0.001694	0.001581	0.001573
66	C1_05560W	RIB4	67	TTCACATGCTTATATACAGG	CGG	0	-	27	no	673	673	35	3	0	3	0	0	0	425	387	430	360	312	464	243	402	314	287	302	284	337	630	633	607	875	594	638	0.000925	0.000901	0.000991	0.000995	0.000894	0.000996	0.000833	0.001076	0.000951	0.001049	0.000892	0.000962
67	C1_05560W	RIB4	68	GTGTTCACATGCTTATATAC	AGG	0	-	24	no	676	676	35	0	0	0	0	0	0	16	43	26	23	21	20	15	6	3	6	20	19	14	9	4	11	38	31	43	3.68988e-05	0.000102	6.20847e-05	6.61283e-05	6.28616e-05	4.49894e-05	5.46142e-05	1.86881e-05	1.2082e-05	2.5494e-05	6.18345e-05	6.74989e-05
68	C1_05780W	RSC9	69	CCAAGATGCATAGCTCTTGA	TGG	0	+	274	no	-184	184	45	1	0	1	0	1	1	15	6	15	24	16	17	12	15	9	8	13	12	9	22	42	37	54	24	34	3.47283e-05	1.62493e-05	3.67909e-05	6.88836e-05	4.85749e-05	3.85623e-05	4.43741e-05	4.27158e-05	3.02051e-05	3.2778e-05	4.1223e-05	4.38743e-05
69	C1_05780W	RSC9	70	TATGCATCTTGGCTGAGTAT	AGG	0	-	282	no	-192	192	40	0	0	0	0	0	0	4396	4253	4194	3461	3510	4549	2777	3835	3447	2874	3333	2818	3252	5872	6220	6298	8716	5495	6995	0.009544	0.009875	0.009646	0.009539	0.010032	0.009748	0.009482	0.0102411	0.0104147	0.0104708	0.009817	0.009514
70	C1_05780W	RSC9	71	CCATCAAGAGCTATGCATCT	TGG	0	-	271	no	-181	181	45	0	0	0	0	0	0	851	790	824	726	636	849	543	775	675	584	687	570	650	1191	1167	1285	1641	959	1304	0.001849	0.001836	0.001897	0.002003	0.00182	0.001821	0.001857	0.002072	0.002042	0.002131	0.002026	0.001927
71	C1_05780W	RSC9	72	CATATTGCAAAATATTGACA	TGG	0	+	204	no	-114	114	25	0	0	0	0	0	0	114	77	89	92	74	89	59	74	73	79	75	49	75	136	115	133	183	108	118	0.00025	0.000181	0.000207	0.000256	0.000214	0.000193	0.000205	0.0002	0.000224	0.000291	0.000224	0.000169
72	C1_06230C	MDM34	73	CTAACGGGTTATTCGTACTT	TGG	0	+	57	no	238	238	40	0	0	0	0	0	0	362	336	365	343	318	380	250	327	317	224	263	268	322	516	604	531	695	445	634	0.000788	0.000782	0.000842	0.000948	0.000911	0.000816	0.000857	0.000876	0.000961	0.000819	0.000777	0.000908
73	C1_06230C	MDM34	74	TACGAATAACCCGTTAGAAT	TGG	0	-	60	no	235	235	35	0	0	0	0	0	0	174	128	166	146	156	149	97	125	117	98	116	91	89	172	196	233	289	160	171	0.00038	0.000299	0.000384	0.000405	0.000449	0.000321	0.000335	0.000336	0.000356	0.000361	0.000345	0.00031
74	C1_06230C	MDM34	75	AAAAGTGTGCAAAAAGCTAT	AGG	0	-	19	no	276	276	30	0	0	0	0	0	0	360	321	310	327	291	407	196	308	241	219	281	252	271	447	530	491	695	480	565	0.000784	0.000747	0.000715	0.000904	0.000834	0.000874	0.000672	0.000825	0.000731	0.000801	0.00083	0.000854
75	C1_06230C	MDM34	76	TATATTTGAATCTACCACTT	TGG	0	+	229	no	66	66	25	0	0	0	0	0	0	1829	1779	1867	1532	1468	1981	1268	1633	1402	1256	1535	1303	1497	2537	2555	2619	3747	2331	3010	0.003972	0.004132	0.004295	0.004224	0.004197	0.004246	0.004332	0.004362	0.004238	0.004578	0.004523	0.004401
76	C1_06850W	PCL7	77	AGACCATTATCACAGCTATT	CGG	0	+	269	no	337	337	35	0	0	0	0	0	0	2111	1769	1878	1631	1600	2202	1259	1670	1538	1167	1501	1351	1566	2211	2411	2312	3634	2286	2971	0.004584	0.004109	0.004321	0.004497	0.004575	0.00472	0.004301	0.004461	0.004649	0.004254	0.004423	0.004563
77	C1_06850W	PCL7	78	GTATGTTTCTATTATAATGG	GGG	0	-	27	no	579	579	25	0	0	0	0	0	0	338	304	282	251	246	324	204	247	210	196	222	210	233	344	395	388	610	413	484	0.000736	0.000708	0.000651	0.000694	0.000706	0.000696	0.0007	0.000662	0.000637	0.000717	0.000657	0.000712
78	C1_06850W	PCL7	79	TTTGTATGTTTCTATTATAA	TGG	0	-	24	no	582	582	15	0	0	0	0	0	0	20	17	26	17	16	37	10	21	19	13	10	15	9	48	24	41	30	42	34	4.55808e-05	4.17838e-05	6.20847e-05	4.95962e-05	4.85749e-05	8.14093e-05	3.75473e-05	5.87342e-05	6.04102e-05	5.09881e-05	3.23895e-05	5.39991e-05
79	C1_06850W	PCL7	80	ATACCGAATAGCTGTGATAA	TGG	0	-	263	no	343	343	35	0	0	0	0	0	0	1441	1378	1382	1164	1174	1514	915	1289	1122	922	1132	939	1076	2084	2091	2181	3035	1818	2397	0.00313	0.003201	0.00318	0.00321	0.003357	0.003246	0.003127	0.003444	0.003392	0.003362	0.003336	0.003172
80	C1_07240W	YPD1	81	GCAGTGATAACCAATCAAGA	CGG	0	+	85	no	62	62	40	0	0	0	0	0	0	576	545	568	464	461	599	332	480	458	329	440	379	435	709	758	728	1073	683	821	0.001252	0.001267	0.001308	0.001281	0.00132	0.001285	0.001137	0.001284	0.001386	0.001202	0.001299	0.001282
81	C1_07240W	YPD1	82	CAATGTAGTGCCGTCTTGAT	TGG	0	-	72	no	75	75	45	0	0	0	0	0	0	16	11	19	11	7	11	11	10	8	15	10	15	5	11	31	22	23	11	30	3.68988e-05	2.78559e-05	4.59886e-05	3.30641e-05	2.28588e-05	2.57082e-05	4.09607e-05	2.93671e-05	2.71846e-05	5.82721e-05	3.23895e-05	5.39991e-05
82	C1_07240W	YPD1	83	AAAGTTCTTGGAATACTAAG	AGG	0	+	36	no	111	111	30	0	0	0	0	0	0	312	316	310	230	225	355	196	299	232	198	240	218	259	419	441	479	656	363	406	0.000679	0.000736	0.000715	0.000636	0.000646	0.000763	0.000672	0.000801	0.000704	0.000725	0.00071	0.000739
83	C1_07240W	YPD1	84	TGTTAGCGCCAAAGAAAAAG	AGG	0	-	227	no	-80	80	40	3	0	3	0	3	0	1197	1005	928	859	872	1166	730	798	624	597	858	778	793	1001	1144	1221	2111	1259	1578	0.0026	0.002335	0.002136	0.00237	0.002494	0.0025	0.002495	0.002133	0.001888	0.002178	0.002529	0.002629
84	C1_07600W	ATP7	85	ATAGGTGTCACGTGAAACAG	TGG	0	+	278	no	-216	216	45	0	0	0	0	0	0	1178	1092	1065	896	932	1212	774	829	779	585	804	781	913	1092	1144	1140	2261	1423	1709	0.002559	0.002537	0.002451	0.002472	0.002666	0.002599	0.002645	0.002216	0.002356	0.002134	0.00237	0.002639
85	C1_07600W	ATP7	86	ATGGTTGTAAGAATTTGTGT	TGG	0	-	62	no	0	0	30	0	0	0	0	0	0	2759	2718	2766	2248	2084	2896	1716	2652	2256	1850	2119	1854	2144	4667	4833	5061	5522	3424	4423	0.005991	0.006312	0.006363	0.006197	0.005958	0.006206	0.005861	0.007083	0.006817	0.006741	0.006242	0.006261
86	C1_07600W	ATP7	87	GGATATTGCTATTGAAGATG	TGG	0	-	31	no	31	31	35	0	0	0	0	0	0	374	371	326	313	220	351	240	282	271	205	268	212	266	403	410	432	664	469	547	0.000814	0.000864	0.000752	0.000865	0.000631	0.000754	0.000823	0.000756	0.000822	0.00075	0.000792	0.000719
87	C1_07600W	ATP7	88	AAATCTATGTCGTGTAGAAA	TGG	0	+	235	no	-173	173	30	0	0	0	0	0	0	43	43	50	33	39	54	36	35	44	28	45	24	30	67	69	52	83	62	69	9.55027e-05	0.000102	0.000117	9.36817e-05	0.000114	0.000118	0.000126	9.61105e-05	0.000136	0.000106	0.000135	8.43737e-05
88	C1_07910C	MRPL3	89	AAGCTGGAACAAATGTGAGA	AGG	0	+	175	no	-31	31	40	0	0	0	0	0	0	253	125	113	111	125	149	86	44	49	50	52	59	58	36	23	37	98	45	69	0.000551	0.000292	0.000262	0.000309	0.00036	0.000321	0.000297	0.00012	0.000151	0.000186	0.000156	0.000202
89	C1_07910C	MRPL3	90	TTTAGTCTTACCACTGGAAA	GGG	0	+	46	no	98	98	35	0	0	0	0	0	0	62	57	50	53	37	37	43	37	43	30	37	42	40	53	76	98	128	60	70	0.000137	0.000135	0.000117	0.000149	0.000109	8.14093e-05	0.00015	0.000101	0.000133	0.000113	0.000112	0.000145
90	C1_07910C	MRPL3	91	TTAGTCTTACCACTGGAAAG	GGG	0	+	45	no	99	99	40	3	0	3	0	3	0	156	168	157	134	142	158	110	154	136	86	113	102	139	250	201	191	363	192	214	0.000341	0.000392	0.000363	0.000372	0.000409	0.000341	0.000379	0.000414	0.000414	0.000317	0.000336	0.000348
91	C1_07910C	MRPL3	92	TTCCAGTGGTAAGACTAAAA	TGG	0	-	47	no	97	97	35	3	0	3	0	3	0	229	227	170	174	177	255	142	226	162	152	200	157	166	291	325	340	434	296	389	0.000499	0.000529	0.000393	0.000482	0.000509	0.000548	0.000488	0.000606	0.000492	0.000557	0.000592	0.000533
92	C1_08920W	C1_08920W	93	TTCTTCCTTCGATTACCCAT	TGG	0	-	85	no	-48	48	40	3	0	3	0	3	0	17	12	5	12	10	11	6	1		9	5	9	6	2	3	2	13	1	20	3.90693e-05	3.01772e-05	1.37966e-05	3.58195e-05	3.14308e-05	2.57082e-05	2.38937e-05	5.33947e-06	3.02051e-06	3.64201e-05	1.7667e-05	3.37495e-05
93	C1_08920W	C1_08920W	94	TTATGTGGTTATTGTTGGGG	TGG	0	-	50	no	-13	13	40	0	0	0	0	0	0	279	318	340	244	244	321	197	180	172	146	257	217	228	181	145	151	584	368	510	0.000608	0.000741	0.000784	0.000675	0.0007	0.00069	0.000676	0.000483	0.000523	0.000535	0.00076	0.000736
94	C1_08920W	C1_08920W	95	GTTGTGGACTGTTGATTATG	TGG	0	-	35	no	2	2	40	0	0	0	0	0	0	1594	1479	1462	1309	1235	1589	1048	1342	1191	1052	1143	1053	1162	2074	2092	2254	3071	2026	2527	0.003462	0.003436	0.003364	0.00361	0.003532	0.003406	0.003581	0.003585	0.0036	0.003835	0.003369	0.003557
95	C1_08920W	C1_08920W	96	GTGGGGTAAGGGGGTGGTTG	TGG	0	-	19	no	18	18	65	0	0	0	0	0	0	364	324	327	292	247	351	276	270	302	206	233	208	297	503	487	493	658	406	529	0.000792	0.000754	0.000754	0.000807	0.000709	0.000754	0.000946	0.000723	0.000915	0.000754	0.000689	0.000705
96	C1_09030C	COX5	97	TTGAATACTTGTTGGGGGAG	GGG	0	-	11	no	431	431	45	0	0	0	0	0	0	560	546	558	416	419	597	322	469	416	390	346	346	404	815	896	891	1149	657	843	0.001218	0.00127	0.001285	0.001149	0.0012	0.001281	0.001103	0.001255	0.00126	0.001424	0.001022	0.001171
97	C1_09030C	COX5	98	TAGTTAGTGGGATTTGGTAC	AGG	0	-	154	no	288	288	40	0	0	0	0	0	0																				2.17052e-06	2.32132e-06	2.29943e-06	2.75534e-06	2.85735e-06	2.14235e-06	3.41339e-06	2.66974e-06	3.02051e-06	3.64201e-06	2.9445e-06	3.37495e-06
98	C1_09030C	COX5	99	TAAAATTAGTTAGTGGGATT	TGG	0	-	148	no	294	294	25	0	0	0	0	0	0	650	705	651	552	529	766	438	642	515	453	501	424	516	945	1008	973	1305	827	1100	0.001413	0.001639	0.001499	0.001524	0.001514	0.001643	0.001498	0.001717	0.001559	0.001653	0.001478	0.001434
99	C1_09030C	COX5	100	GATTGGTTAAAATTAGTTAG	TGG	0	-	141	no	301	301	25	0	0	0	0	0	0	361	335	376	319	297	402	265	344	292	247	294	263	282	534	537	530	719	482	613	0.000786	0.00078	0.000867	0.000882	0.000851	0.000863	0.000908	0.000921	0.000885	0.000903	0.000869	0.000891
100	C1_09450C	NUP188	101	AGACGTGGAAACTAGTAAAA	GGG	0	+	16	no	54	54	35	0	0	0	0	0	0	2851	2625	2752	2370	2222	2935	1887	2641	2264	1661	2107	1847	2066	3804	4002	3887	5360	3097	4390	0.00619	0.006096	0.00633	0.006533	0.006352	0.00629	0.006444	0.007053	0.006841	0.006053	0.006207	0.006237
101	C1_09450C	NUP188	102	GTATTTATTCGCAACACGCC	AGG	0	+	263	no	-193	193	45	0	0	0	0	0	0	32	23	34	30	34	43	25	19	19	18	23	30	39	18	49	58	72	31	64	7.1627e-05	5.57117e-05	8.04801e-05	8.54157e-05	0.0001	9.42634e-05	8.87481e-05	5.33947e-05	6.04102e-05	6.91981e-05	7.0668e-05	0.000105
102	C1_09450C	NUP188	103	ACTAGTTTCCACGTCTTAAT	TGG	0	-	20	no	50	50	35	0	0	0	0	0	0	581	521	469	449	444	592	283	474	431	407	376	369	404	707	759	795	911	632	741	0.001263	0.001212	0.001081	0.00124	0.001272	0.00127	0.000969	0.001268	0.001305	0.001486	0.00111	0.001249
103	C1_09450C	NUP188	104	TCTTTGATGGTTTAACTTCC	TGG	0	-	242	no	-172	172	35	0	0	0	0	0	0	260	277	282	216	240	312	211	173	128	114	210	205	226	195	193	165	574	360	464	0.000567	0.000645	0.000651	0.000598	0.000689	0.000671	0.000724	0.000465	0.00039	0.000419	0.000621	0.000695
104	C1_09960W	PET100	105	AGGGGAAACTAAGTTTAGTT	TGG	0	-	68	no	-35	35	35	0	0	0	0	0	0	4052	3761	3745	3286	3054	4159	2482	3097	2621	2146	2838	2574	3083	4084	3892	4099	7565	4674	6290	0.008797	0.008733	0.008614	0.009057	0.008729	0.008912	0.008475	0.008271	0.00792	0.007819	0.008359	0.00869
105	C1_09960W	PET100	106	CCAATTTATTGCCGCTGTTA	AGG	0	+	228	no	-195	195	40	0	0	0	0	0	0	4367	4072	4165	3471	3345	4534	2843	3811	3537	2837	3405	2778	3267	6352	6680	6824	8502	5457	7033	0.009481	0.009455	0.009579	0.009567	0.009561	0.009716	0.009708	0.010177	0.0106866	0.010336	0.010029	0.009379
106	C1_09960W	PET100	107	CCTTAACAGCGGCAATAAAT	TGG	0	-	225	no	-192	192	40	0	0	0	0	0	0	80	86	71	50	39	57	34	35	47	36	40	42	33	72	84	96	99	78	92	0.000176	0.000202	0.000166	0.000141	0.000114	0.000124	0.000119	9.61105e-05	0.000145	0.000135	0.000121	0.000145
107	C1_09960W	PET100	108	CACAATAGTTACCTTAACAG	CGG	0	-	214	no	-181	181	35	0	0	0	0	0	0	243	180	224	185	168	237	146	176	174	110	181	128	156	301	284	309	343	241	322	0.00053	0.00042	0.000517	0.000512	0.000483	0.00051	0.000502	0.000473	0.000529	0.000404	0.000536	0.000435
108	C1_10960W	C1_10960W	109	TGTCCGTTAGATTCCTGATG	AGG	0	+	169	no	-137	137	45	0	0	0	0	0	0	617	500	506	430	405	576	391	61	64	51	380	334	355	80	102	112	944	553	572	0.001341	0.001163	0.001166	0.001188	0.00116	0.001236	0.001338	0.000166	0.000196	0.000189	0.001122	0.001131
109	C1_10960W	C1_10960W	110	CAACCTCATCAGGAATCTAA	CGG	0	-	163	no	-131	131	40	0	0	0	0	0	0	33	29	35	37	25	29	19	16	19	26	23	20	32	37	25	55	51	36	39	7.37975e-05	6.96397e-05	8.27796e-05	0.000105	7.4291e-05	6.42705e-05	6.82678e-05	4.53855e-05	6.04102e-05	9.83341e-05	7.0668e-05	7.08739e-05
110	C1_10960W	C1_10960W	111	GGTGGTTGTTTATGGATTGA	AGG	0	-	26	no	6	6	40	0	0	0	0	0	0	1071	946	871	761	820	1042	659	803	704	589	702	692	756	1205	1397	1311	1999	1292	1505	0.002327	0.002198	0.002005	0.0021	0.002346	0.002234	0.002253	0.002146	0.002129	0.002149	0.00207	0.002339
111	C1_10960W	C1_10960W	112	GTTTGAAGGGTGGTTGTTTA	TGG	0	-	18	no	14	14	40	0	0	0	0	0	0	313	274	283	233	197	314	186	289	210	171	236	160	208	467	468	467	488	351	460	0.000682	0.000638	0.000653	0.000645	0.000566	0.000675	0.000638	0.000774	0.000637	0.000626	0.000698	0.000543
112	C1_11240C	CHO1	113	AAGAAGAGCTGAATGTGAGG	AGG	0	-	44	no	12	12	45	0	0	0	0	0	0			1				1													2.17052e-06	2.32132e-06	4.59886e-06	2.75534e-06	2.85735e-06	2.14235e-06	6.82678e-06	2.66974e-06	3.02051e-06	3.64201e-06	2.9445e-06	3.37495e-06
113	C1_11240C	CHO1	114	TGGAAGAAGAGCTGAATGTG	AGG	0	-	41	no	15	15	45	0	0	0	0	0	0												1								2.17052e-06	2.32132e-06	2.29943e-06	2.75534e-06	2.85735e-06	2.14235e-06	3.41339e-06	2.66974e-06	3.02051e-06	3.64201e-06	2.9445e-06	6.74989e-06
114	C1_11240C	CHO1	115	TATGTGTGGAGTAAGAAAAG	TGG	0	-	21	no	35	35	35	0	0	0	0	0	0	1211	1177	1154	1053	919	1347	759	1041	1006	771	896	842	855	1849	1878	1809	2407	1366	1832	0.002631	0.002735	0.002656	0.002904	0.002629	0.002888	0.002594	0.002782	0.003042	0.002812	0.002641	0.002845
115	C1_11240C	CHO1	116	CCTTAAGGCAAAATTACAAT	AGG	0	-	243	no	-187	187	30	0	0	0	0	0	0	353	320	274	246	233	340	186	235	232	187	224	206	193	358	421	427	680	355	453	0.000768	0.000745	0.000632	0.000681	0.000669	0.000731	0.000638	0.00063	0.000704	0.000685	0.000663	0.000699
116	C1_11500C	ARO7	117	GAATTGTAATAGCTTTATTG	TGG	0	-	30	no	28	28	25	0	0	0	0	0	0	224	230	240	184	170	251	150	195	184	152	207	145	171	309	341	321	390	305	416	0.000488	0.000536	0.000554	0.00051	0.000489	0.00054	0.000515	0.000523	0.000559	0.000557	0.000612	0.000493
117	C1_11500C	ARO7	118	TACGTTGATTTCGAAATCCC	GGG	0	+	232	no	-174	174	40	0	0	0	0	0	0	148	105	119	95	88	144	100	102	100	63	90	76	89	134	190	179	259	140	176	0.000323	0.000246	0.000276	0.000265	0.000254	0.000311	0.000345	0.000275	0.000305	0.000233	0.000268	0.00026
118	C1_11500C	ARO7	119	ACGTTGATTTCGAAATCCCG	GGG	0	+	231	no	-173	173	45	1	0	1	1	1	0	153	131	174	159	107	152	120	141	161	113	143	96	131	271	321	231	340	222	228	0.000334	0.000306	0.000402	0.000441	0.000309	0.000328	0.000413	0.000379	0.000489	0.000415	0.000424	0.000327
119	C1_11500C	ARO7	120	GTTCAATATATACATTACCC	CGG	0	-	211	no	-153	153	30	1	0	1	1	1	0	1		1																	4.34103e-06	2.32132e-06	4.59886e-06	2.75534e-06	2.85735e-06	2.14235e-06	3.41339e-06	2.66974e-06	3.02051e-06	3.64201e-06	2.9445e-06	3.37495e-06
120	C1_12260W	VPH2	121	TCGCATTAGACGAGAGATTC	AGG	0	+	108	no	-19	19	45	1	0	1	1	1	0	96	72	89	78	65	74	53	82	77	50	58	60	57	132	140	131	164	89	173	0.000211	0.000169	0.000207	0.000218	0.000189	0.000161	0.000184	0.000222	0.000236	0.000186	0.000174	0.000206
121	C1_12260W	VPH2	122	CGCATTAGACGAGAGATTCA	GGG	0	+	107	no	-18	18	45	0	0	0	0	0	0	2254	2107	2073	1923	1763	2279	1418	1743	1724	1336	1617	1421	1576	2465	2578	2698	4158	2504	3513	0.004895	0.004893	0.004769	0.005301	0.00504	0.004885	0.004844	0.004656	0.00521	0.004869	0.004764	0.004799
122	C1_12260W	VPH2	123	ATGAGGCTAGATTTGATTAA	TGG	0	-	27	no	62	62	30	0	0	0	0	0	0	1422	1267	1233	991	985	1343	834	1128	942	909	1056	915	941	1680	1746	1815	2377	1517	2015	0.003089	0.002943	0.002837	0.002733	0.002817	0.002879	0.00285	0.003014	0.002848	0.003314	0.003112	0.003091
123	C1_12260W	VPH2	124	GTTGCTATAAATAATAATAA	TGG	0	-	269	no	-180	180	15	0	0	0	0	0	0	77	60	75	59	47	83	45	60	49	38	51	58	60	104	110	96	125	81	143	0.000169	0.000142	0.000175	0.000165	0.000137	0.00018	0.000157	0.000163	0.000151	0.000142	0.000153	0.000199
124	C1_12360C	RIB3	125	TATTAAATAACACAAACTAG	GGG	0	-	142	no	73	73	20	0	0	0	0	0	0	1420	1245	1373	1056	988	1309	885	1325	1029	896	966	892	1089	1876	1980	2142	2578	1659	2039	0.003084	0.002892	0.003159	0.002912	0.002826	0.002806	0.003024	0.00354	0.003111	0.003267	0.002847	0.003014
125	C1_12360C	RIB3	126	TGTATTAAATAACACAAACT	AGG	0	-	140	no	75	75	20	0	0	0	0	0	0	1282	1087	1117	926	871	1205	748	1038	886	711	867	763	831	1499	1596	1689	2021	1359	1728	0.002785	0.002526	0.002571	0.002554	0.002492	0.002584	0.002557	0.002774	0.002679	0.002593	0.002556	0.002578
126	C1_12360C	RIB3	127	TATATATAAAGAAAGGGAGT	TGG	0	-	14	no	201	201	25	0	0	0	0	0	0	1022	876	860	806	748	985	620	881	709	541	680	627	745	1157	1271	1377	1943	1174	1410	0.00222	0.002036	0.00198	0.002224	0.00214	0.002112	0.00212	0.002355	0.002145	0.001974	0.002005	0.002119
127	C1_12360C	RIB3	128	AAAGATCAGTTATATTTGTA	TGG	0	-	239	no	-24	24	20	0	0	0	0	0	0	339	315	323	244	222	358	231	300	232	212	244	210	246	416	471	475	568	341	467	0.000738	0.000734	0.000745	0.000675	0.000637	0.000769	0.000792	0.000804	0.000704	0.000776	0.000721	0.000712
128	C1_12610W	C1_12610W	129	AATTTGAGGAATAATAATAT	TGG	0	-	131	no	-88	88	15	0	0	0	0	0	0	76	56	70	50	51	83	35	47	35	29	43	37	47	63	69	69	103	62	93	0.000167	0.000132	0.000163	0.000141	0.000149	0.00018	0.000123	0.000128	0.000109	0.000109	0.00013	0.000128
129	C1_12610W	C1_12610W	130	AGAAAGAACAAATGAATTTG	AGG	0	-	117	no	-74	74	25	1	0	1	1	1	0	4397	4290	4387	3688	3621	4923	2902	3161	2906	2253	3340	2983	3251	3601	3963	3992	8337	5063	6564	0.009546	0.009961	0.0100899	0.0101645	0.0103493	0.010549	0.009909	0.008442	0.008781	0.008209	0.009838	0.010071
130	C1_12610W	C1_12610W	131	GTGATAATGTTATATGTTGT	CGG	0	-	28	no	15	15	25	1	0	1	1	1	0	141	151	143	116	113	179	77	120	90	91	93	98	80	189	172	191	257	188	202	0.000308	0.000353	0.000331	0.000322	0.000326	0.000386	0.000266	0.000323	0.000275	0.000335	0.000277	0.000334
131	C1_12610W	C1_12610W	132	TGAGATGAGATTGAATATGA	AGG	0	+	213	no	-170	170	30	0	0	0	0	0	0	1263	991	953	855	834	1134	675	256	231	209	785	675	761	203	206	267	1689	1118	1474	0.002744	0.002303	0.002194	0.002359	0.002386	0.002432	0.002307	0.000686	0.000701	0.000765	0.002314	0.002281
132	C1_12660W	C1_12660W	133	GATTGAAAGGCGGACGGGGA	GGG	0	-	233	no	-141	141	60	0	0	0	0	0	0	353	314	308	264	290	335	234	287	228	221	249	229	293	451	462	438	679	386	503	0.000768	0.000731	0.000711	0.00073	0.000831	0.00072	0.000802	0.000769	0.000692	0.000809	0.000736	0.000776
133	C1_12660W	C1_12660W	134	ATTGGATTGAAAGGCGGACG	GGG	0	-	229	no	-137	137	50	2	0	2	2	2	0	1195	1249	1191	1032	867	1307	819	1000	903	854	948	856	1003	1665	1842	1940	2498	1424	1963	0.002596	0.002902	0.002741	0.002846	0.00248	0.002802	0.002799	0.002672	0.002731	0.003114	0.002794	0.002892
134	C1_12660W	C1_12660W	135	GATTGGATTGAAAGGCGGAC	GGG	0	-	228	no	-136	136	50	1	0	1	1	1	0	2650	2554	2584	2095	2131	2701	1756	2421	2120	1751	1969	1728	2060	3660	3813	3869	5356	3466	4226	0.005754	0.005931	0.005944	0.005775	0.006092	0.005789	0.005997	0.006466	0.006407	0.006381	0.005801	0.005835
135	C1_12660W	C1_12660W	136	AGATTGGATTGAAAGGCGGA	CGG	0	-	227	no	-135	135	45	1	0	1	1	1	0	147	139	137	115	84	100	83	101	104	90	101	85	129	177	209	184	209	174	195	0.000321	0.000325	0.000317	0.00032	0.000243	0.000216	0.000287	0.000272	0.000317	0.000331	0.0003	0.00029
136	C1_12810W	RIB7	137	CAAATTGCCTCCCACCACCA	AGG	0	+	145	no	-70	70	55	1	0	1	1	1	0	216	170	189	157	186	180	145	165	131	130	153	120	126	271	235	285	437	233	344	0.000471	0.000397	0.000437	0.000435	0.000534	0.000388	0.000498	0.000443	0.000399	0.000477	0.000453	0.000408
137	C1_12810W	RIB7	138	AAATTGCCTCCCACCACCAA	GGG	0	+	144	no	-69	69	50	0	0	0	0	0	0	124	152	115	136	113	179	79	114	109	80	112	86	114	168	189	173	352	179	273	0.000271	0.000355	0.000267	0.000377	0.000326	0.000386	0.000273	0.000307	0.000332	0.000295	0.000333	0.000294
138	C1_12810W	RIB7	139	GGTTGGTTGGTAGATTTCAA	GGG	0	-	67	no	8	8	40	0	0	0	0	0	0	1545	1535	1535	1335	1162	1605	1019	1347	1183	1014	1161	1026	1198	2115	2267	2443	2999	1925	2325	0.003356	0.003566	0.003532	0.003681	0.003323	0.003441	0.003482	0.003599	0.003576	0.003697	0.003422	0.003466
139	C1_12810W	RIB7	140	ATTGGGGTTTGTTTGTTAGT	TGG	0	+	240	no	-165	165	35	0	0	0	0	0	0	3111	2668	3014	2323	2179	3053	1950	2594	2217	1880	2320	1894	2184	4158	4580	4471	5806	3844	4807	0.006755	0.006196	0.006933	0.006403	0.006229	0.006543	0.00666	0.006928	0.006699	0.006851	0.006834	0.006396
140	C1_13370W	C1_13370W	141	AATGTTGATTTATCCATTAT	GGG	0	+	237	no	-172	172	20	0	0	0	0	0	0	42	65	46	46	38	56	36	52	46	33	53	45	51	63	83	76	93	81	98	9.33322e-05	0.000153	0.000108	0.00013	0.000111	0.000122	0.000126	0.000141	0.000142	0.000124	0.000159	0.000155
141	C1_13370W	C1_13370W	142	TATCCATTATGGGGATGTGG	TGG	0	+	227	no	-162	162	45	0	0	0	0	0	0	632	583	591	467	479	688	419	414	415	325	438	455	481	522	579	558	1192	694	853	0.001374	0.001356	0.001361	0.00129	0.001372	0.001476	0.001434	0.001108	0.001257	0.001187	0.001293	0.001539
142	C1_13370W	C1_13370W	143	CCATTATGGGGATGTGGTGG	TGG	0	+	224	no	-159	159	55	2	0	2	0	2	0	54	45	61	44	55	55	42	41	48	25	53	40	43	60	82	93	130	62	76	0.000119	0.000107	0.000143	0.000124	0.00016	0.00012	0.000147	0.000112	0.000148	9.46921e-05	0.000159	0.000138
143	C1_13370W	C1_13370W	144	CCACCACCACATCCCCATAA	TGG	0	-	221	no	-156	156	55	2	0	2	0	2	0	5666	5462	5514	4451	4334	5797	3767	4932	4416	3721	4417	3663	4376	8226	8429	8581	11865	7182	9495	0.0123003	0.0126814	0.0126814	0.012267	0.012387	0.012421	0.0128616	0.01317	0.0133416	0.0135555	0.0130088	0.0123658
144	C2_00710W	NPL6	145	AAGGATTCTGCAAATTAAAA	AGG	0	+	244	no	-209	209	25	2	0	2	0	2	0	1392	1355	1392	1200	1108	1469	842	1288	1009	894	1107	870	1082	1864	1953	1927	2810	1666	2088	0.003024	0.003148	0.003203	0.003309	0.003169	0.003149	0.002877	0.003441	0.003051	0.00326	0.003263	0.00294
145	C2_00710W	NPL6	146	GATTCTGCAAATTAAAAAGG	AGG	0	+	241	no	-206	206	30	0	0	0	0	0	0	240	250	224	183	163	251	160	258	184	141	179	145	168	328	364	349	442	211	337	0.000523	0.000583	0.000517	0.000507	0.000469	0.00054	0.00055	0.000691	0.000559	0.000517	0.00053	0.000493
146	C2_00710W	NPL6	147	ATTCTGCAAATTAAAAAGGA	GGG	0	+	240	no	-205	205	25	0	0	0	0	0	0	275	275	290	258	223	303	205	256	242	192	216	174	223	487	498	513	522	361	478	0.000599	0.000641	0.000669	0.000714	0.00064	0.000651	0.000703	0.000686	0.000734	0.000703	0.000639	0.000591
147	C2_00710W	NPL6	148	TTCTGCAAATTAAAAAGGAG	GGG	0	+	239	no	-204	204	30	0	0	0	0	0	0	564	524	570	469	435	615	417	502	401	334	401	362	463	684	811	705	958	628	874	0.001226	0.001219	0.001313	0.001295	0.001246	0.00132	0.001427	0.001343	0.001214	0.00122	0.001184	0.001225
148	C2_01030W	C2_01030W	149	CTATGTGTTGAAAATATAAT	AGG	0	+	168	yes	-154	154	20	0	0	0	0	0	0																				2.17052e-06	2.32132e-06	2.29943e-06	2.75534e-06	2.85735e-06	2.14235e-06	3.41339e-06	2.66974e-06	3.02051e-06	3.64201e-06	2.9445e-06	3.37495e-06
149	C2_01030W	C2_01030W	150	CTATTATATTTTCAACACAT	AGG	0	-	166	yes	-152	152	20	2	0	2	0	2	0	12	12	8	6	7	13	8	5	3	10	16	8	2	8	6	24	8	6	14	2.82167e-05	3.01772e-05	2.06949e-05	1.92874e-05	2.28588e-05	2.99929e-05	3.07205e-05	1.60184e-05	1.2082e-05	4.00621e-05	5.00565e-05	3.03745e-05
150	C2_01030W	C2_01030W	151	GCTGAACGTCAAATAGCTAC	TGG	0	-	83	no	-69	69	45	2	0	2	0	2	0	19	24	24	11	19	24	11	12	23	6	29	14	17	12	18	17	47	33	19	4.34103e-05	5.80331e-05	5.74858e-05	3.30641e-05	5.71469e-05	5.35588e-05	4.09607e-05	3.47066e-05	7.24922e-05	2.5494e-05	8.83351e-05	5.06242e-05
151	C2_01030W	C2_01030W	152	GATTTACATTCTGAAGATTC	TGG	0	+	221	yes	-207	207	30	0	0	0	0	0	0																				2.17052e-06	2.32132e-06	2.29943e-06	2.75534e-06	2.85735e-06	2.14235e-06	3.41339e-06	2.66974e-06	3.02051e-06	3.64201e-06	2.9445e-06	3.37495e-06
152	C2_01200C	REG1	153	AAGATGGGTTATGTGTGTGT	GGG	0	-	118	no	313	313	40	2	0	2	0	2	0	346	292	348	254	275	352	224	287	213	194	269	217	254	326	321	337	659	411	464	0.000753	0.00068	0.000803	0.000703	0.000789	0.000756	0.000768	0.000769	0.000646	0.00071	0.000795	0.000736
153	C2_01200C	REG1	154	AAAGATGGGTTATGTGTGTG	TGG	0	-	117	no	314	314	40	0	0	0	0	0	0	579	507	583	462	450	635	330	431	423	368	366	302	460	861	762	984	1118	722	896	0.001259	0.001179	0.001343	0.001276	0.001289	0.001363	0.00113	0.001153	0.001281	0.001344	0.001081	0.001023
154	C2_01200C	REG1	155	GACAACGACAACGATAAAGA	TGG	0	-	102	no	329	329	40	0	0	0	0	0	0	1572	1593	1617	1303	1206	1694	962	1323	1203	962	1156	1020	1129	1963	2171	2122	3112	1959	2441	0.003414	0.0037	0.00372	0.003593	0.003449	0.003631	0.003287	0.003535	0.003637	0.003507	0.003407	0.003446
155	C2_01200C	REG1	156	ATAAACTCCGTATAAGATTG	GGG	0	-	228	no	203	203	30	0	0	0	0	0	0	981	902	907	859	744	1047	638	909	703	611	705	601	717	1268	1398	1353	1943	1179	1507	0.002131	0.002096	0.002088	0.00237	0.002129	0.002245	0.002181	0.002429	0.002126	0.002229	0.002079	0.002032
156	C2_01300C	MNN24	157	AATAAGATAGAAAAGATGAA	TGG	0	-	198	no	-1	1	20	0	0	0	0	0	0	299	268	246	223	252	327	175	242	208	136	194	203	207	321	320	364	587	403	454	0.000651	0.000624	0.000568	0.000617	0.000723	0.000703	0.000601	0.000649	0.000631	0.000499	0.000574	0.000688
157	C2_01300C	MNN24	158	GAACAAGTGAATAAGGTGAT	GGG	0	-	70	no	127	127	35	0	0	0	0	0	0	1506	1415	1422	1221	1198	1483	988	1327	1164	1043	1049	966	1129	2117	2260	2273	2835	1845	2273	0.003271	0.003287	0.003272	0.003367	0.003426	0.003179	0.003376	0.003545	0.003519	0.003802	0.003092	0.003264
158	C2_01300C	MNN24	159	TGAACAAGTGAATAAGGTGA	TGG	0	-	69	no	128	128	35	0	0	0	0	0	0	1295	1159	1298	1047	924	1329	810	1222	983	862	860	839	931	1950	2125	2093	2621	1570	1908	0.002813	0.002693	0.002987	0.002888	0.002643	0.002849	0.002768	0.003265	0.002972	0.003143	0.002535	0.002835
159	C2_01300C	MNN24	160	GCTCCCTCAGAATTAGGTAT	TGG	0	-	30	no	167	167	45	0	0	0	0	0	0	5973	5452	5423	4614	4516	6052	3683	4952	4352	3729	4373	3872	4193	7873	8236	8382	11452	7025	8666	0.0129667	0.012658	0.0124721	0.0127159	0.0129066	0.0129676	0.0125749	0.0132232	0.0131483	0.013585	0.012879	0.0130712
160	C2_02270C	C2_02270C	161	AAAAAAATTAAAGTGAGAAC	GGG	0	-	205	no	-160	160	20	0	0	0	0	0	0	175	231	192	170	168	234	143	171	149	140	168	134	146	289	302	259	357	236	321	0.000382	0.000539	0.000444	0.000471	0.000483	0.000503	0.000492	0.000459	0.000453	0.000514	0.000498	0.000456
161	C2_02270C	C2_02270C	162	TATGTATATATCTTTGTTTA	TGG	0	-	20	no	25	25	15	0	0	0	0	0	0	634	585	518	457	444	588	380	463	378	301	445	372	438	689	774	830	1134	693	859	0.001378	0.00136	0.001193	0.001262	0.001272	0.001262	0.001301	0.001239	0.001145	0.0011	0.001313	0.001259
162	C2_02270C	C2_02270C	163	AACAAACAAACAACTAACAT	AGG	0	+	242	no	-197	197	25	0	0	0	0	0	0	1141	1063	1014	841	846	1118	689	926	756	699	860	767	849	1234	1241	1241	1996	1351	1575	0.002479	0.00247	0.002334	0.00232	0.00242	0.002397	0.002355	0.002475	0.002287	0.002549	0.002535	0.002592
163	C2_02270C	C2_02270C	164	AAACAACTAACATAGGTTTA	TGG	0	+	235	no	-190	190	25	2	0	2	0	2	0	730	699	752	569	579	768	464	642	520	461	591	495	560	950	1075	1045	1428	853	990	0.001587	0.001625	0.001731	0.001571	0.001657	0.001647	0.001587	0.001717	0.001574	0.001683	0.001743	0.001674
164	C2_03560C	C2_03560C	165	TGGCGCAAAGGACAAAAAAA	AGG	0	+	125	no	-99	99	40	2	0	2	0	2	0	6411	6350	6496	5196	5117	7054	4269	5795	5182	4161	4911	4398	5063	8566	9383	9421	13023	8111	9974	0.0139173	0.014743	0.0149394	0.0143195	0.0146239	0.015114	0.0145752	0.0154738	0.0156553	0.015158	0.0144634	0.0148464
165	C2_03560C	C2_03560C	166	AGGAAATTCGCCAGAACTCT	TGG	0	+	105	no	-79	79	45	0	0	0	0	0	0	446	440	363	321	355	446	272	266	236	170	322	247	304	258	246	265	774	435	580	0.00097	0.001024	0.000837	0.000887	0.001017	0.000958	0.000932	0.000713	0.000716	0.000623	0.000951	0.000837
166	C2_03560C	C2_03560C	167	GGCACTATCACCAAGAGTTC	TGG	0	-	92	no	-66	66	50	0	0	0	0	0	0	424	335	290	284	263	346	205	158	159	123	213	209	255	138	123	138	623	301	447	0.000922	0.00078	0.000669	0.000785	0.000754	0.000743	0.000703	0.000424	0.000483	0.000452	0.00063	0.000709
167	C2_03560C	C2_03560C	168	CAAGAATAATGCTTGATTTC	TGG	0	-	37	no	-11	11	30	0	0	0	0	0	0	35	37	52	38	32	49	19	33	39	22	24	27	35	59	49	44	74	40	47	7.81386e-05	8.82102e-05	0.000122	0.000107	9.42924e-05	0.000107	6.82678e-05	9.0771e-05	0.000121	8.37661e-05	7.36126e-05	9.44985e-05
168	C2_04590C	QCR8	169	TTATTGGTCAGACTATATGC	AGG	0	-	163	no	-132	132	35	0	0	0	0	0	0	1		1					2	1				2					2	5	4.34103e-06	2.32132e-06	4.59886e-06	2.75534e-06	2.85735e-06	2.14235e-06	3.41339e-06	8.00921e-06	6.04102e-06	3.64201e-06	2.9445e-06	3.37495e-06
169	C2_04590C	QCR8	170	TCTCTCTCTCACTTTGGTGG	TGG	0	-	109	no	-78	78	50	0	0	0	0	0	0	1897	1880	1741	1542	1392	1906	1246	1632	1467	1181	1438	1305	1532	2785	2834	2697	3818	2252	3249	0.00412	0.004366	0.004006	0.004251	0.00398	0.004085	0.004256	0.00436	0.004434	0.004305	0.004237	0.004408
170	C2_04590C	QCR8	171	CTCTCTCTCTCTCACTTTGG	TGG	0	-	106	no	-75	75	50	1	0	1	0	1	0	1018	910	900	769	784	933	665	578	491	467	730	630	690	546	657	674	1761	1108	1553	0.002212	0.002115	0.002072	0.002122	0.002243	0.002001	0.002273	0.001546	0.001486	0.001704	0.002152	0.00213
171	C2_04590C	QCR8	172	TCTCTCTCTCTCTCTCACTT	TGG	0	-	103	no	-72	72	45	1	0	1	0	1	0	1740	1704	1614	1375	1382	1811	1205	1287	1165	995	1299	1197	1319	1841	1903	2180	3192	1978	2571	0.003779	0.003958	0.003714	0.003791	0.003952	0.003882	0.004117	0.003439	0.003522	0.003627	0.003828	0.004043
172	C2_04710C	URE2	173	GGAATTTGATATATTTATGG	AGG	0	-	262	no	182	182	25	1	0	1	0	1	0	4867	4561	4672	3604	3678	4871	2941	4222	3291	2972	3523	3020	3553	6248	6665	6994	8919	5770	7206	0.0105661	0.0105899	0.0107452	0.009933	0.010512	0.0104375	0.0100422	0.0112743	0.009944	0.0108277	0.0103764	0.0101957
173	C2_04710C	URE2	174	ATGGGAATTTGATATATTTA	TGG	0	-	259	no	185	185	20	0	0	0	0	0	0	3173	3099	3220	2533	2437	3172	1947	2961	2448	1933	2462	2063	2393	4477	4791	4664	6300	3873	4790	0.006889	0.007196	0.007406	0.006982	0.006966	0.006798	0.006649	0.007908	0.007397	0.007044	0.007252	0.006966
174	C2_04710C	URE2	175	TGTGATAATTGATGGAATAA	TGG	0	-	240	no	204	204	25	0	0	0	0	0	0	1833	1914	1784	1576	1507	1994	1197	1722	1452	1258	1461	1220	1482	2706	2639	2599	3624	2379	2977	0.003981	0.004445	0.004104	0.004345	0.004309	0.004274	0.004089	0.0046	0.004389	0.004585	0.004305	0.004121
175	C2_04710C	URE2	176	TTATAATCTGTGATAATTGA	TGG	0	-	232	no	212	212	20	0	0	0	0	0	0	21	34	23	25	16	37	12	14	16	12	20	23	15	17	30	19	41	27	26	4.77513e-05	8.12463e-05	5.51864e-05	7.1639e-05	4.85749e-05	8.14093e-05	4.43741e-05	4.0046e-05	5.13487e-05	4.73461e-05	6.18345e-05	8.09987e-05
176	C2_04800C	MDM10	177	GTGGTTGATGTGGTTTGGTC	TGG	0	-	133	no	-11	11	50	0	0	0	0	0	0	155	108	139	102	92	120	77	95	121	79	78	68	72	179	167	171	214	150	141	0.000339	0.000253	0.000322	0.000284	0.000266	0.000259	0.000266	0.000256	0.000369	0.000291	0.000233	0.000233
177	C2_04800C	MDM10	178	TAAAATGTTGATGGTTGATG	TGG	0	-	114	no	8	8	30	0	0	0	0	0	0	1404	1289	1362	1105	1068	1359	861	1051	940	682	999	833	1020	1454	1615	1650	2448	1480	1923	0.00305	0.002995	0.003134	0.003047	0.003055	0.002914	0.002942	0.002809	0.002842	0.002487	0.002945	0.002815
178	C2_04800C	MDM10	179	TACATAATCACACTAATTAT	TGG	0	+	245	no	-123	123	20	0	0	0	0	0	0	160	133	151	115	104	135	103	115	96	92	105	76	88	134	198	187	306	153	175	0.000349	0.000311	0.00035	0.00032	0.0003	0.000291	0.000355	0.00031	0.000293	0.000339	0.000312	0.00026
179	C2_04800C	MDM10	180	ATTAGTGTGATTATGTAAGC	AGG	0	-	248	no	-126	126	30	0	0	0	0	0	0	309	274	315	249	212	283	184	295	228	179	229	178	197	343	458	474	636	323	445	0.000673	0.000638	0.000727	0.000689	0.000609	0.000608	0.000631	0.00079	0.000692	0.000656	0.000677	0.000604
180	C2_04810W	HIS3	183	TTATTCATTACATAACTTAT	AGG	0	+	36	no	40	40	15	0	0	0	0	0	0	109	107	114	97	105	122	90	97	94	75	97	83	103	161	144	208	245	177	181	0.000239	0.000251	0.000264	0.00027	0.000303	0.000264	0.000311	0.000262	0.000287	0.000277	0.000289	0.000283
181	C2_04810W	HIS3	184	TCGTTTGTGCTTTAACTTCT	TGG	0	+	259	no	-183	183	35	0	0	0	0	0	0	80	72	77	66	52	83	38	52	62	52	78	27	57	103	112	119	166	92	116	0.000176	0.000169	0.000179	0.000185	0.000151	0.00018	0.000133	0.000141	0.00019	0.000193	0.000233	9.44985e-05
182	C2_05500W	ATP4	185	AGATACTAGATTTCCTATTT	AGG	0	-	170	no	-140	140	25	0	0	0	0	0	0	715	655	673	562	578	680	459	638	503	400	580	449	511	894	981	903	1355	805	919	0.001554	0.001523	0.00155	0.001551	0.001654	0.001459	0.00157	0.001706	0.001522	0.00146	0.001711	0.001519
183	C2_05500W	ATP4	186	GAGCGAGAAACAAATATGAT	TGG	0	-	146	no	-116	116	35	0	0	0	0	0	0	397	380	386	318	326	395	281	392	268	256	263	238	276	517	543	644	723	509	568	0.000864	0.000884	0.00089	0.000879	0.000934	0.000848	0.000963	0.001049	0.000813	0.000936	0.000777	0.000807
184	C2_05500W	ATP4	187	TGTAAATGTGAAAGAAAGGG	AGG	0	+	79	no	-49	49	35	0	0	0	0	0	0	1001	812	808	740	673	967	511	343	348	305	617	558	617	254	295	278	1497	965	1251	0.002175	0.001887	0.00186	0.002042	0.001926	0.002074	0.001748	0.000918	0.001054	0.001114	0.00182	0.001887
185	C2_05500W	ATP4	188	GTAAATGTGAAAGAAAGGGA	GGG	0	+	78	no	-48	48	35	0	0	0	0	0	0	145	110	116	97	107	130	100	53	32	41	68	69	92	40	23	37	152	110	120	0.000317	0.000258	0.000269	0.00027	0.000309	0.000281	0.000345	0.000144	9.96768e-05	0.000153	0.000203	0.000236
186	C2_06120C	C2_06120C	189	AATTTGGAACGCGTTTATTA	TGG	0	+	117	no	-105	105	30	0	0	0	0	0	0	104	61	72	57	54	87	73	67	41	53	46	55	40	74	82	102	145	77	77	0.000228	0.000144	0.000168	0.00016	0.000157	0.000189	0.000253	0.000182	0.000127	0.000197	0.000138	0.000189
187	C2_06120C	C2_06120C	190	AACGCGTTCCAAATTTGTTC	AGG	0	-	122	no	-110	110	40	0	0	0	0	0	0	136	108	112	91	89	115	71	117	87	89	92	82	77	178	192	196	220	143	178	0.000297	0.000253	0.00026	0.000253	0.000257	0.000249	0.000246	0.000315	0.000266	0.000328	0.000274	0.00028
188	C2_06120C	C2_06120C	191	CGTGTGTCTGTGCAGGCTGT	TGG	0	+	288	no	-276	276	60	0	0	0	0	0	0	3024	3022	3062	2470	2349	3032	1993	2723	2410	2111	2368	2067	2313	4274	4421	4476	6230	3861	4931	0.006566	0.007017	0.007043	0.006808	0.006715	0.006498	0.006806	0.007272	0.007282	0.007692	0.006976	0.006979
189	C2_06120C	C2_06120C	192	GTGTGTCTGTGCAGGCTGTT	GGG	0	+	287	no	-275	275	55	0	0	0	0	0	0	14	12	23	14	7	24	6	21	15	11	15	7	25	29	19	18	25	22	22	3.25577e-05	3.01772e-05	5.51864e-05	4.13302e-05	2.28588e-05	5.35588e-05	2.38937e-05	5.87342e-05	4.83281e-05	4.37041e-05	4.7112e-05	2.69996e-05
190	C2_06290C	ATP14	193	CACACACTTGAGTTGATTTG	TGG	0	+	117	no	-86	86	40	0	0	0	0	0	0	240	175	204	175	172	201	140	100	74	66	144	106	119	53	65	52	319	201	245	0.000523	0.000409	0.000471	0.000485	0.000494	0.000433	0.000481	0.00027	0.000227	0.000244	0.000427	0.000361
191	C2_06290C	ATP14	194	CACTTGAGTTGATTTGTGGA	AGG	0	+	113	no	-82	82	40	0	0	0	0	0	0																				2.17052e-06	2.32132e-06	2.29943e-06	2.75534e-06	2.85735e-06	2.14235e-06	3.41339e-06	2.66974e-06	3.02051e-06	3.64201e-06	2.9445e-06	3.37495e-06
192	C2_06290C	ATP14	195	CTTGAGTTGATTTGTGGAAG	GGG	0	+	111	no	-80	80	40	0	0	0	0	0	0	282	248	259	240	198	264	182	250	205	177	186	170	221	346	358	332	569	314	449	0.000614	0.000578	0.000598	0.000664	0.000569	0.000568	0.000625	0.00067	0.000622	0.000648	0.000551	0.000577
193	C2_06290C	ATP14	196	CAACTCAAGTGTGTGCGATT	CGG	0	-	122	no	-91	91	45	0	0	0	0	0	0																				2.17052e-06	2.32132e-06	2.29943e-06	2.75534e-06	2.85735e-06	2.14235e-06	3.41339e-06	2.66974e-06	3.02051e-06	3.64201e-06	2.9445e-06	3.37495e-06
194	C2_07670C	GLE1	197	TTACGGAATAGAAAATGTAG	GGG	0	-	112	no	24	24	30	0	0	0	0	0	0	262	249	229	204	205	275	170	109	108	95	171	155	174	112	164	87	474	295	393	0.000571	0.00058	0.000529	0.000565	0.000589	0.000591	0.000584	0.000294	0.000329	0.00035	0.000506	0.000526
195	C2_07670C	GLE1	198	TTGTATGATTCAGATACTAG	GGG	0	-	81	no	55	55	30	0	0	0	0	0	0	43	49	20	36	29	59	19	24	34	28	41	30	32	71	51	62	99	42	44	9.55027e-05	0.000116	4.82881e-05	0.000102	8.57204e-05	0.000129	6.82678e-05	6.67434e-05	0.000106	0.000106	0.000124	0.000105
196	C2_07670C	GLE1	199	TAGTCTGTGATTCACCAAAT	TGG	0	+	256	no	-120	120	35	0	0	0	0	0	0	146	108	107	104	97	111	74	98	100	94	79	71	100	170	197	146	224	167	214	0.000319	0.000253	0.000248	0.000289	0.00028	0.00024	0.000256	0.000264	0.000305	0.000346	0.000236	0.000243
197	C2_07670C	GLE1	200	AACACTCATGAATGAGATAG	TGG	0	+	286	no	-150	150	35	0	0	0	0	0	0	172	146	95	87	104	131	76	112	117	88	100	82	93	186	204	227	274	125	196	0.000375	0.000341	0.000221	0.000242	0.0003	0.000283	0.000263	0.000302	0.000356	0.000324	0.000297	0.00028
198	C2_07680W	C2_07680W	201	GTTAACGTCGGTCTTTCTTC	TGG	0	-	156	no	-135	135	45	0	0	0	0	0	0	552	585	538	473	464	625	370	554	495	422	431	379	443	820	869	832	1139	651	798	0.0012	0.00136	0.001239	0.001306	0.001329	0.001341	0.001266	0.001482	0.001498	0.001541	0.001272	0.001282
199	C2_07680W	C2_07680W	202	TTCTCCCTCTCCATTCTGTT	TGG	0	+	84	no	-63	63	45	0	0	0	0	0	0	171	165	160	127	144	185	79	67	57	43	87	111	112	34	39	32	232	122	170	0.000373	0.000385	0.00037	0.000353	0.000414	0.000398	0.000273	0.000182	0.000175	0.00016	0.000259	0.000378
200	C2_07680W	C2_07680W	203	CTAACCAAACAGAATGGAGA	GGG	0	-	77	no	-56	56	40	0	0	0	0	0	0	59	33	40	49	24	52	48	21	18	12	30	18	16	10	8	8	56	20	54	0.00013	7.89249e-05	9.42767e-05	0.000138	7.14337e-05	0.000114	0.000167	5.87342e-05	5.73897e-05	4.73461e-05	9.12796e-05	6.4124e-05
201	C2_07680W	C2_07680W	204	TCTAACCAAACAGAATGGAG	AGG	0	-	76	no	-55	55	40	0	0	0	0	0	0	642	498	447	462	340	548	324	180	154	132	227	215	250	58	76	59	445	296	396	0.001396	0.001158	0.00103	0.001276	0.000974	0.001176	0.001109	0.000483	0.000468	0.000484	0.000671	0.000729
202	C2_09380W	RRP15	205	CGAGAGTCTAATTTCTTACG	CGG	0	-	106	no	-46	46	40	0	0	0	0	0	0	414	360	379	291	281	379	249	250	189	176	248	243	323	177	238	285	688	422	590	0.000901	0.000838	0.000874	0.000805	0.000806	0.000814	0.000853	0.00067	0.000574	0.000645	0.000733	0.000823
203	C2_09380W	RRP15	206	TATGAAGAGACCATCCCTCT	AGG	0	+	62	no	-2	2	45	0	0	0	0	0	0	944	966	928	756	853	963	594	680	587	470	764	557	684	834	890	886	1987	1117	1407	0.002051	0.002245	0.002136	0.002086	0.00244	0.002065	0.002031	0.001818	0.001776	0.001715	0.002253	0.001883
204	C2_09380W	RRP15	207	CATCCCTCTAGGTAAACCAC	TGG	0	+	51	no	9	9	50	0	0	0	0	0	0	387	389	375	280	327	400	229	123	136	73	276	271	262	111	133	101	727	491	527	0.000842	0.000905	0.000865	0.000774	0.000937	0.000859	0.000785	0.000331	0.000414	0.00027	0.000816	0.000918
205	C2_09380W	RRP15	208	CAGTGGTTTACCTAGAGGGA	TGG	0	-	49	no	11	11	50	0	0	0	0	0	0	5	2	4	3	1	7	6					6	2					4	6	1.30231e-05	6.96397e-06	1.14972e-05	1.10214e-05	5.71469e-06	1.71388e-05	2.38937e-05	2.66974e-06	3.02051e-06	3.64201e-06	2.9445e-06	2.36246e-05
206	C2_09680W	C2_09680W	209	GACTTGGTTGCACACTCCGG	CGG	0	+	277	no	-184	184	60	0	0	0	0	0	0	1317	1218	1137	1022	987	1294	828	932	877	645	951	828	925	1228	1211	1390	2654	1573	1987	0.002861	0.00283	0.002617	0.002819	0.002823	0.002774	0.00283	0.002491	0.002652	0.002353	0.002803	0.002798
207	C2_09680W	C2_09680W	210	CAACCAAGTCCAAAGTGGGC	CGG	0	-	287	no	-194	194	55	0	0	0	0	0	0	26	27	20	6	13	17	15	16	11	15	11	12	16	29	25	17	48	25	33	5.86039e-05	6.4997e-05	4.82881e-05	1.92874e-05	4.00029e-05	3.85623e-05	5.46142e-05	4.53855e-05	3.62461e-05	5.82721e-05	3.5334e-05	4.38743e-05
208	C2_09680W	C2_09680W	211	GTGTGCAACCAAGTCCAAAG	TGG	0	-	282	no	-189	189	50	0	0	0	0	0	0																				2.17052e-06	2.32132e-06	2.29943e-06	2.75534e-06	2.85735e-06	2.14235e-06	3.41339e-06	2.66974e-06	3.02051e-06	3.64201e-06	2.9445e-06	3.37495e-06
209	C2_09680W	C2_09680W	212	GAAGTATTTGGAAATACTAA	AGG	0	-	24	no	69	69	25	0	0	0	0	0	0	150	146	121	109	99	171	86	117	111	99	110	129	126	190	193	208	317	184	244	0.000328	0.000341	0.000281	0.000303	0.000286	0.000368	0.000297	0.000315	0.000338	0.000364	0.000327	0.000439
210	C2_09840W	MTW1	213	AACAGACCACCACAACTACT	TGG	0	+	40	no	8	8	45	0	0	0	0	0	0	1356	1586	1321	1193	1191	1356	872	1261	1107	954	1163	973	1070	1923	2055	2086	2776	1735	2256	0.002945	0.003684	0.00304	0.00329	0.003406	0.002907	0.00298	0.003369	0.003347	0.003478	0.003427	0.003287
211	C2_09840W	MTW1	214	GTTGTGGTGGTCTGTTGTTG	TGG	0	-	44	no	4	4	50	0	0	0	0	0	0	202	225	248	198	155	223	170	211	135	108	174	145	207	294	364	276	371	258	339	0.000441	0.000525	0.000573	0.000548	0.000446	0.00048	0.000584	0.000566	0.000411	0.000397	0.000515	0.000493
212	C2_09840W	MTW1	215	GAATAGCCAAGTAGTTGTGG	TGG	0	-	31	no	17	17	45	0	0	0	0	0	0	20	12	17	7	5	8	7	8	10	4	8	7	15	8	15	4	22	7	27	4.55808e-05	3.01772e-05	4.13898e-05	2.20428e-05	1.71441e-05	1.92812e-05	2.73071e-05	2.40276e-05	3.32256e-05	1.821e-05	2.65005e-05	2.69996e-05
213	C2_09840W	MTW1	216	TAAGAATAGCCAAGTAGTTG	TGG	0	-	28	no	20	20	35	0	0	2	0	2	0	4086	4025	3945	3341	3278	4368	2639	3752	3106	2709	3161	2755	3062	5587	5832	5911	8194	4831	6148	0.008871	0.009346	0.009074	0.009208	0.009369	0.00936	0.009011	0.0100195	0.009385	0.00987	0.009311	0.009301
214	C2_10280C	SPT23	217	AAAGTGGAAAGTGGTGGAGG	CGG	0	-	150	no	11	11	50	0	0	2	0	2	0	331	364	341	298	242	375	237	319	267	220	255	257	264	499	507	492	721	386	552	0.000721	0.000847	0.000786	0.000824	0.000694	0.000806	0.000812	0.000854	0.000809	0.000805	0.000754	0.000871
215	C2_10280C	SPT23	218	TGTGTGTAATAAGTGTGTGT	AGG	0	-	281	no	-120	120	35	0	0	2	0	2	0	1048	769	836	677	738	909	547	500	424	424	682	511	661	634	720	689	1656	1033	1230	0.002277	0.001787	0.001925	0.001868	0.002112	0.00195	0.001871	0.001338	0.001284	0.001548	0.002011	0.001728
216	C2_10280C	SPT23	219	TTGAGTAGGCGGGTGGTAGT	GGG	0	-	246	no	-85	85	55	0	0	2	0	2	0	215	103	105	91	79	102	66	9	16	13	74	50	75			5	166	88	119	0.000469	0.000241	0.000244	0.000253	0.000229	0.000221	0.000229	2.66974e-05	5.13487e-05	5.09881e-05	0.000221	0.000172
217	C2_10280C	SPT23	220	TTTGAGTAGGCGGGTGGTAG	TGG	0	-	245	no	-84	84	55	0	0	0	0	0	0	709	472	518	406	412	512	332	156	128	116	421	337	411	134	124	169	965	575	774	0.001541	0.001098	0.001193	0.001121	0.00118	0.001099	0.001137	0.000419	0.00039	0.000426	0.001243	0.001141
218	C3_01080W	MRPL33	221	CGAAAGCTCAACGTTAAGGA	AGG	0	+	103	no	-27	27	45	0	0	0	0	0	0		1																		2.17052e-06	4.64264e-06	2.29943e-06	2.75534e-06	2.85735e-06	2.14235e-06	3.41339e-06	2.66974e-06	3.02051e-06	3.64201e-06	2.9445e-06	3.37495e-06
219	C3_01080W	MRPL33	222	CAACGTTAAGGAAGGAAGGA	AGG	0	+	95	no	-19	19	45	0	0	0	0	0	0	297	268	282	245	217	308	211	35	37	24	236	183	231	28	43	25	587	327	470	0.000647	0.000624	0.000651	0.000678	0.000623	0.000662	0.000724	9.61105e-05	0.000115	9.10501e-05	0.000698	0.000621
220	C3_01080W	MRPL33	223	TCCCGGACAACACCCAAAAC	TGG	0	+	247	no	-171	171	55	0	0	0	0	0	0	682	766	729	576	516	695	392	331	309	251	536	447	526	210	160	243	1330	820	1168	0.001482	0.00178	0.001679	0.00159	0.001477	0.001491	0.001341	0.000886	0.000936	0.000918	0.001581	0.001512
221	C3_01080W	MRPL33	224	GGTTTGCAAAAACACATTTA	CGG	0	+	226	no	-150	150	30	1	0	1	0	0	0	243	214	216	162	190	211	153	134	115	90	173	160	170	94	112	96	402	243	351	0.00053	0.000499	0.000499	0.000449	0.000546	0.000454	0.000526	0.00036	0.00035	0.000331	0.000512	0.000543
222	C3_01300C	NCE103	225	GGAAGGGATATAAACAATTT	AGG	0	-	103	no	242	242	30	1	0	1	0	0	0	681	674	638	562	522	667	434	584	559	423	522	475	477	819	931	917	1331	799	974	0.00148	0.001567	0.001469	0.001551	0.001494	0.001431	0.001485	0.001562	0.001691	0.001544	0.00154	0.001606
223	C3_01300C	NCE103	226	TCTTGTACGACCAGTATCAG	TGG	0	+	60	no	285	285	45	0	0	0	0	0	0	141	168	122	115	109	135	103	138	112	102	104	100	118	205	179	230	281	180	272	0.000308	0.000392	0.000283	0.00032	0.000314	0.000291	0.000355	0.000371	0.000341	0.000375	0.000309	0.000341
224	C3_01300C	NCE103	227	TGGCATCACCATCTCAATTG	AGG	0	+	40	no	305	305	45	0	0	0	0	0	0	1606	1466	1414	1209	1168	1549	1054	1325	1197	1056	1131	1063	1092	2088	2165	2198	2866	1659	2252	0.003488	0.003405	0.003254	0.003334	0.00334	0.003321	0.003601	0.00354	0.003619	0.00385	0.003333	0.003591
225	C3_01300C	NCE103	228	GATGGTGATGCCACTGATAC	TGG	0	-	47	no	298	298	50	0	0	0	0	0	0	4	2	2		1	2	1	1		1			2	5		1	9		6	1.08526e-05	6.96397e-06	6.8983e-06	2.75534e-06	5.71469e-06	6.42705e-06	6.82678e-06	5.33947e-06	3.02051e-06	7.28401e-06	2.9445e-06	3.37495e-06
226	C3_02370C	ALR1	229	GAACTAAGGACTGAGGACTG	AGG	0	-	181	no	362	362	50	0	0	0	0	0	0	42	30	37	31	48	49	23	32	26	32	39	27	31	52	45	48	31	40	73	9.33322e-05	7.1961e-05	8.73784e-05	8.8171e-05	0.00014	0.000107	8.19213e-05	8.81013e-05	8.15537e-05	0.00012	0.000118	9.44985e-05
227	C3_02370C	ALR1	230	ATATTAAGAACTAAGGACTG	AGG	0	-	174	no	369	369	30	0	0	0	0	0	0	1710	1618	1579	1368	1253	1727	1031	1638	1378	1235	1219	1095	1251	2966	3002	2967	3237	2090	2405	0.003714	0.003758	0.003633	0.003772	0.003583	0.003702	0.003523	0.004376	0.004165	0.004502	0.003592	0.003699
228	C3_02370C	ALR1	231	GGACTAGACTAGGAACAGGG	GGG	0	-	249	no	294	294	55	0	0	0	0	0	0	535	538	529	417	440	557	404	500	422	315	413	347	416	823	806	851	1079	678	894	0.001163	0.001251	0.001219	0.001152	0.00126	0.001195	0.001382	0.001338	0.001278	0.001151	0.001219	0.001174
229	C3_02370C	ALR1	232	ATTGGACTAGACTAGGAACA	GGG	0	-	246	no	297	297	40	0	0	0	0	0	0	193	159	155	112	125	173	98	123	94	100	115	96	121	129	206	191	256	187	226	0.000421	0.000371	0.000359	0.000311	0.00036	0.000373	0.000338	0.000331	0.000287	0.000368	0.000342	0.000327
230	C3_02670W	C3_02670W	233	TTGCTTTCACAAAGATCACT	GGG	0	-	190	no	-172	172	35	0	0	0	0	0	0	86	49	77	56	40	62	44	56	55	47	61	47	39	78	79	112	130	80	102	0.000189	0.000116	0.000179	0.000157	0.000117	0.000135	0.000154	0.000152	0.000169	0.000175	0.000183	0.000162
231	C3_02670W	C3_02670W	234	GTTGCTTTCACAAAGATCAC	TGG	0	-	189	no	-171	171	40	0	0	0	0	0	0	29	31	33	18	18	35	4	12	22	15	11	10	9	34	54	49	40	28	38	6.51155e-05	7.42823e-05	7.81807e-05	5.23515e-05	5.42896e-05	7.71246e-05	1.70669e-05	3.47066e-05	6.94717e-05	5.82721e-05	3.5334e-05	3.71244e-05
232	C3_02670W	C3_02670W	235	CAACAGATGGTGATGGTTGT	AGG	0	+	88	no	-70	70	45	0	0	0	0	0	0	21	25	19	17	23	28	25	23	18	22	17	20	13	43	39	31	51	38	28	4.77513e-05	6.03544e-05	4.59886e-05	4.95962e-05	6.85763e-05	6.21282e-05	8.87481e-05	6.40736e-05	5.73897e-05	8.37661e-05	5.3001e-05	7.08739e-05
233	C3_02670W	C3_02670W	236	CACCATCTGTTGCAAAAAAT	AGG	0	-	96	no	-78	78	35	0	0	0	0	0	0	71	65	65	70	63	74	58	65	49	39	67	52	44	87	128	117	198	91	111	0.000156	0.000153	0.000152	0.000196	0.000183	0.000161	0.000201	0.000176	0.000151	0.000146	0.0002	0.000179
234	C3_04830C	FAS2	237	AATTTCTTGTAAGCTAATTG	AGG	0	+	290	no	-247	247	25	0	0	0	0	0	0	95	109	86	72	72	111	79	92	89	59	60	61	71	139	136	137	134	123	165	0.000208	0.000255	0.0002	0.000201	0.000209	0.00024	0.000273	0.000248	0.000272	0.000219	0.00018	0.000209
235	C3_04830C	FAS2	238	TAAGCTAATTGAGGGTGTTT	CGG	0	+	281	no	-238	238	35	0	0	0	0	0	0	818	821	863	656	672	866	547	729	635	581	626	589	613	1235	1295	1290	1730	1109	1318	0.001778	0.001908	0.001987	0.00181	0.001923	0.001857	0.001871	0.001949	0.001921	0.00212	0.001846	0.001991
236	C3_04830C	FAS2	239	TCCAGCTTAGGGCATATTGT	TGG	0	+	153	no	-110	110	45	0	0	0	0	0	0	1102	1008	1020	859	838	990	731	818	792	656	730	679	800	1347	1451	1411	1938	1209	1559	0.002394	0.002342	0.002348	0.00237	0.002397	0.002123	0.002499	0.002187	0.002395	0.002393	0.002152	0.002295
237	C3_04830C	FAS2	240	ACCAACAATATGCCCTAAGC	TGG	0	-	149	no	-106	106	45	0	0	0	0	0	0	419	445	449	383	394	478	294	406	331	272	395	325	381	618	535	677	1044	574	728	0.000912	0.001035	0.001035	0.001058	0.001129	0.001026	0.001007	0.001087	0.001003	0.000994	0.001166	0.0011
238	C3_05800W	C3_05800W	241	CCAAAAAAACACGACTTGGA	AGG	0	+	132	no	-104	104	40	0	0	0	0	0	0	1102	887	903	721	685	1020	635	465	381	320	691	590	742	354	409	437	1926	1203	1438	0.002394	0.002061	0.002079	0.001989	0.00196	0.002187	0.002171	0.001244	0.001154	0.001169	0.002038	0.001995
239	C3_05800W	C3_05800W	242	ACTAGTGTCTTGTACGTTAT	TGG	0	+	269	no	-241	241	35	0	0	1	0	1	0	118	137	152	116	86	126	101	157	107	94	113	85	111	219	191	201	312	169	222	0.000258	0.00032	0.000352	0.000322	0.000249	0.000272	0.000348	0.000422	0.000326	0.000346	0.000336	0.00029
240	C3_05800W	C3_05800W	243	CAGTAAGACAAACCAAGCCA	AGG	0	+	16	no	12	12	45	0	0	1	0	1	0	54	10	20	12	10	10	13	3	12	2	10	6	7			2	20	6	22	0.000119	2.55345e-05	4.82881e-05	3.58195e-05	3.14308e-05	2.35659e-05	4.77874e-05	1.06789e-05	3.92666e-05	1.0926e-05	3.23895e-05	2.36246e-05
241	C3_05800W	C3_05800W	244	AGTAAGACAAACCAAGCCAA	GGG	0	+	15	no	13	13	40	0	0	0	0	0	0	4892	4792	4968	4136	3967	5222	3391	4262	3717	3205	3684	3345	3755	6424	6937	7068	9897	6023	7718	0.0106203	0.0111261	0.0114259	0.0113989	0.011338	0.0111895	0.0115782	0.0113811	0.0112303	0.0116763	0.0108505	0.0112926
242	C3_05830W	KRE6	245	TAGCAACCCTTTATTATACT	TGG	0	+	73	no	132	132	30	0	0	0	0	0	0	1148	1149	1094	956	1007	1237	764	1049	909	792	925	755	858	1615	1769	1614	2315	1450	1890	0.002494	0.00267	0.002518	0.002637	0.00288	0.002652	0.002611	0.002803	0.002749	0.002888	0.002727	0.002551
243	C3_05830W	KRE6	246	AATGTTGCCAAGTATAATAA	AGG	0	-	63	no	142	142	25	0	0	0	0	0	0	287	343	306	275	258	311	238	239	252	197	255	185	222	440	448	496	617	421	505	0.000625	0.000799	0.000706	0.00076	0.00074	0.000668	0.000816	0.000641	0.000764	0.000721	0.000754	0.000628
244	C3_05830W	KRE6	247	ATATATATATATATGAATGG	TGG	0	-	32	no	173	173	15	0	0	0	0	0	0	12	8	10	6	5	8	7	12	4	4	6	14	9	19	2	12	13	19	27	2.82167e-05	2.08919e-05	2.52938e-05	1.92874e-05	1.71441e-05	1.92812e-05	2.73071e-05	3.47066e-05	1.51025e-05	1.821e-05	2.06115e-05	5.06242e-05
245	C3_05830W	KRE6	248	TATTCTATTCTATTCTATTA	AGG	0	+	200	no	5	5	15	0	0	0	0	0	0	330	287	317	271	197	307	221	280	200	205	243	234	283	391	475	367	568	363	473	0.000718	0.000669	0.000731	0.000749	0.000566	0.00066	0.000758	0.00075	0.000607	0.00075	0.000718	0.000793
246	C3_06520C	C3_06520C	249	AGGGGAGTAAAAGAGCATCG	TGG	0	+	190	no	-143	143	50	0	0	0	0	0	0	3128	3081	3151	2594	2415	3211	2062	2706	2437	2075	2417	2014	2334	4571	4718	4644	6334	3681	4788	0.006792	0.007154	0.007248	0.00715	0.006903	0.006881	0.007042	0.007227	0.007364	0.007561	0.00712	0.006801
247	C3_06520C	C3_06520C	250	GAAGAATGAGACGCGCGATG	TGG	0	+	158	no	-111	111	55	0	0	1	0	1	0	341	290	325	294	261	361	235	267	246	232	239	210	274	428	402	501	708	453	508	0.000742	0.000676	0.00075	0.000813	0.000749	0.000776	0.000806	0.000715	0.000746	0.000849	0.000707	0.000712
248	C3_06520C	C3_06520C	251	AAGAATGAGACGCGCGATGT	GGG	0	+	157	no	-110	110	50	0	0	0	0	0	0	364	272	287	288	246	337	205	293	234	188	253	261	258	417	417	520	646	428	534	0.000792	0.000634	0.000662	0.000796	0.000706	0.000724	0.000703	0.000785	0.00071	0.000688	0.000748	0.000884
249	C3_06520C	C3_06520C	252	TATGTTGAATTTACTTAACG	GGG	0	+	217	no	-170	170	25	0	0	0	0	0	0	253	220	219	203	169	231	164	200	156	135	179	162	204	327	327	314	461	271	353	0.000551	0.000513	0.000506	0.000562	0.000486	0.000497	0.000563	0.000537	0.000474	0.000495	0.00053	0.00055
250	C3_07320W	MDS3	253	ACAAAAAGTGAGGGCGTGAG	GGG	0	-	86	no	82	82	50	0	0	0	0	0	0	3766	3587	3673	3001	2902	4130	2436	3496	3304	2593	2948	2633	2899	8318	7578	7685	7844	4820	6171	0.008176	0.008329	0.008448	0.008272	0.008295	0.00885	0.008318	0.009336	0.009983	0.009447	0.008683	0.00889
251	C3_07320W	MDS3	254	AAACAAAAAGTGAGGGCGTG	AGG	0	-	84	no	84	84	45	0	0	0	0	0	0	229	241	227	212	143	201	138	236	148	149	183	151	182	318	325	316	505	260	358	0.000499	0.000562	0.000524	0.000587	0.000411	0.000433	0.000474	0.000633	0.00045	0.000546	0.000542	0.000513
252	C3_07320W	MDS3	255	GATCTTAAGGCACAAGTTAT	TGG	0	+	49	no	119	119	35	0	0	0	0	0	0	586	649	656	557	501	675	473	593	558	415	475	423	528	865	966	888	1192	787	1048	0.001274	0.001509	0.001511	0.001537	0.001434	0.001448	0.001618	0.001586	0.001688	0.001515	0.001402	0.001431
253	C3_07320W	MDS3	256	ATATAACCCACAAGTCTTAG	TGG	0	-	253	no	-85	85	35	0	0	0	0	0	0	142	133	128	98	111	130	81	63	38	55	88	61	78	56	64	62	202	118	158	0.00031	0.000311	0.000297	0.000273	0.00032	0.000281	0.00028	0.000171	0.000118	0.000204	0.000262	0.000209
254	C3_07390C	C3_07390C	257	TGGTAGGTTTGCAGTTGTTG	AGG	0	-	29	no	5	5	45	0	0	0	0	0	0	463	496	490	433	355	531	312	362	389	304	353	335	359	488	526	509	967	654	806	0.001007	0.001154	0.001129	0.001196	0.001017	0.00114	0.001068	0.000969	0.001178	0.001111	0.001042	0.001134
255	C3_07390C	C3_07390C	258	AGAAGGTTGGAGAGCAAGAT	CGG	0	-	255	no	-221	221	45	0	0	0	0	0	0	2517	2354	2393	2046	1889	2629	1619	1915	1835	1490	1856	1562	1920	2921	3172	3229	4734	2923	3943	0.005465	0.005467	0.005505	0.00564	0.0054	0.005634	0.00553	0.005115	0.005546	0.00543	0.005468	0.005275
256	C3_07390C	C3_07390C	259	GACGAGCTAAAGAAGAAGGT	TGG	0	-	242	no	-208	208	45	0	0	0	0	0	0	3025	2916	2894	2406	2262	3097	1966	2486	2270	1873	2192	1854	2189	3993	4218	4417	5908	3555	4757	0.006568	0.006771	0.006657	0.006632	0.006466	0.006637	0.006714	0.00664	0.00686	0.006825	0.006457	0.006261
257	C3_07390C	C3_07390C	260	TAAGTCACGTTTGTCCTTGC	TGG	0	+	215	no	-181	181	45	0	0	0	0	0	0	155	140	173	127	119	159	112	147	137	109	123	109	129	246	293	231	276	162	264	0.000339	0.000327	0.0004	0.000353	0.000343	0.000343	0.000386	0.000395	0.000417	0.000401	0.000365	0.000371
258	C3_07780C	NUP159	261	GGACTGGTTCAAAATTAGTG	GGG	0	+	280	no	-261	261	40	0	0	0	0	0	0	1535	1446	1447	1256	1158	1572	980	1322	1207	976	1120	1002	1203	2096	2303	2211	2999	1809	2416	0.003334	0.003359	0.00333	0.003463	0.003312	0.00337	0.003349	0.003532	0.003649	0.003558	0.003301	0.003385
259	C3_07780C	NUP159	262	CTTCTTGTAGCCTCCCAACA	TGG	0	+	101	no	-82	82	50	0	0	0	0	0	0	2	2	2	3					1	1		2		1	2					6.51155e-06	6.96397e-06	6.8983e-06	1.10214e-05	2.85735e-06	2.14235e-06	3.41339e-06	2.66974e-06	6.04102e-06	7.28401e-06	2.9445e-06	1.01248e-05
260	C3_07780C	NUP159	263	GTGTGGTGCACGACCATGTT	GGG	0	-	85	no	-66	66	55	0	0	0	0	0	0																				2.17052e-06	2.32132e-06	2.29943e-06	2.75534e-06	2.85735e-06	2.14235e-06	3.41339e-06	2.66974e-06	3.02051e-06	3.64201e-06	2.9445e-06	3.37495e-06
261	C3_07780C	NUP159	264	TGTGTGGTGCACGACCATGT	TGG	0	-	84	no	-65	65	55	0	0	0	0	0	0	493	553	502	415	376	512	332	479	434	316	415	338	393	783	810	756	1029	687	869	0.001072	0.001286	0.001157	0.001146	0.001077	0.001099	0.001137	0.001281	0.001314	0.001155	0.001225	0.001144
262	C4_00560C	MMM1	265	TAGTGCCAGAGATTTCACAG	TGG	0	+	89	no	-54	54	45	0	0	0	0	0	0	812	772	833	622	646	837	577	431	345	337	670	474	654	206	207	231	1664	1069	1401	0.001765	0.001794	0.001918	0.001717	0.001849	0.001795	0.001973	0.001153	0.001045	0.001231	0.001976	0.001603
263	C4_00560C	MMM1	266	AGTGCCAGAGATTTCACAGT	GGG	0	+	88	no	-53	53	45	0	0	0	0	0	0	3866	3591	3520	2997	2857	3887	2424	2200	2061	1685	2848	2400	2867	2040	2114	2061	7491	4501	5599	0.008393	0.008338	0.008096	0.008261	0.008166	0.008329	0.008277	0.005876	0.006228	0.00614	0.008389	0.008103
264	C4_00560C	MMM1	267	TGCCAGAGATTTCACAGTGG	GGG	0	+	86	no	-51	51	50	0	0	0	0	0	0	641	621	618	548	496	643	416	386	334	277	493	398	489	406	370	452	1261	718	936	0.001393	0.001444	0.001423	0.001513	0.00142	0.00138	0.001423	0.001033	0.001012	0.001012	0.001455	0.001347
265	C4_00560C	MMM1	268	CCAGAGATTTCACAGTGGGG	GGG	0	+	84	no	-49	49	55	0	0	0	0	0	0	538	398	451	394	383	539	343	77	47	48	346	255	363	4	7	6	974	609	685	0.00117	0.000926	0.001039	0.001088	0.001097	0.001157	0.001174	0.000208	0.000145	0.000178	0.001022	0.000864
266	C4_00890W	ARO1	269	CGATGAGCCATGACCAACAA	GGG	0	-	198	no	-177	177	50	0	0	0	0	0	0	192	196	194	179	132	171	143	193	141	111	141	119	148	290	266	283	343	235	262	0.000419	0.000457	0.000448	0.000496	0.00038	0.000368	0.000492	0.000518	0.000429	0.000408	0.000418	0.000405
267	C4_00890W	ARO1	270	ACGATGAGCCATGACCAACA	AGG	0	-	197	no	-176	176	50	0	0	0	0	0	0	302	278	269	226	197	290	201	209	179	154	203	184	193	337	369	361	534	351	453	0.000658	0.000648	0.000621	0.000625	0.000566	0.000623	0.00069	0.000561	0.000544	0.000565	0.000601	0.000624
268	C4_00890W	ARO1	271	TTTCTCCATCAAACGGTGTT	TGG	0	+	168	no	-147	147	40	0	0	0	0	0	0	112	82	98	95	79	90	61	87	82	61	76	69	49	140	79	146	169	99	121	0.000245	0.000193	0.000228	0.000265	0.000229	0.000195	0.000212	0.000235	0.000251	0.000226	0.000227	0.000236
269	C4_00890W	ARO1	272	ACGGTGTTTGGTTTCTCGTT	TGG	0	+	156	no	-135	135	45	0	0	0	0	0	0	1152	1223	1248	930	951	1261	837	1003	939	733	934	836	945	1586	1763	1823	2559	1485	1963	0.002503	0.002841	0.002872	0.002565	0.00272	0.002704	0.00286	0.00268	0.002839	0.002673	0.002753	0.002825
270	C4_01150W	ASK1	273	GTGTGTTTAAGGGATGCTGG	TGG	0	+	280	no	-252	252	50	0	0	0	0	0	0	313	255	267	229	196	272	184	215	221	158	183	164	218	282	342	337	543	393	532	0.000682	0.000594	0.000616	0.000634	0.000563	0.000585	0.000631	0.000577	0.000671	0.000579	0.000542	0.000557
271	C4_01150W	ASK1	274	TGGTGGTAAATGGTTAGTGG	TGG	0	+	205	no	-177	177	45	0	0	0	0	0	0	1600	1049	1032	883	967	1265	832	363	314	312	883	659	849	234	210	252	2117	1242	1561	0.003475	0.002437	0.002375	0.002436	0.002766	0.002712	0.002843	0.000972	0.000951	0.00114	0.002603	0.002227
272	C4_01150W	ASK1	275	AAATGGTTAGTGGTGGTAAG	TGG	0	+	198	no	-170	170	40	0	0	0	0	0	0	221	126	135	128	127	147	95	39	48	34	117	65	105	33	26	30	190	104	113	0.000482	0.000295	0.000313	0.000355	0.000366	0.000317	0.000328	0.000107	0.000148	0.000127	0.000347	0.000223
273	C4_01150W	ASK1	276	TTAGTGGTGGTAAGTGGAGG	TGG	0	+	192	no	-164	164	50	0	0	0	0	0	0	51	35	37	26	19	29	16	15	12	13	25	17	12	21	13	21	24	29	23	0.000113	8.35676e-05	8.73784e-05	7.43943e-05	5.71469e-05	6.42705e-05	5.80276e-05	4.27158e-05	3.92666e-05	5.09881e-05	7.65571e-05	6.0749e-05
274	C4_01750C	FBA1	277	GTAGGCAAGCAGGCAGAAAG	TGG	0	+	210	no	-153	153	55	0	0	0	0	0	0	61	76	57	53	50	53	47	31	17	27	41	61	45	24	17	36	137	72	93	0.000135	0.000179	0.000133	0.000149	0.000146	0.000116	0.000164	8.54315e-05	5.43692e-05	0.000102	0.000124	0.000209
275	C4_01750C	FBA1	278	TAGGCAAGCAGGCAGAAAGT	GGG	0	+	209	no	-152	152	50	0	0	0	0	0	0	1001	855	864	707	797	981	603	505	513	424	678	636	797	650	639	613	1952	1190	1489	0.002175	0.001987	0.001989	0.001951	0.00228	0.002104	0.002062	0.001351	0.001553	0.001548	0.001999	0.00215
276	C4_01750C	FBA1	279	TTCTGCCTGCTTGCCTACGT	GGG	0	-	212	no	-155	155	55	0	0	0	0	0	0	156	133	154	113	155	153	109	80	111	92	128	95	117	132	166	145	325	175	273	0.000341	0.000311	0.000356	0.000314	0.000446	0.00033	0.000375	0.000216	0.000338	0.000339	0.00038	0.000324
277	C4_01750C	FBA1	280	TTTCTGCCTGCTTGCCTACG	TGG	0	-	211	no	-154	154	55	0	0	0	0	0	0	100	88	78	64	74	116	64	73	81	59	59	56	51	100	114	94	179	91	118	0.000219	0.000207	0.000182	0.000179	0.000214	0.000251	0.000222	0.000198	0.000248	0.000219	0.000177	0.000192
278	C4_01870C	ERG8	281	CATTGGTATAATTGGTCTTG	GGG	0	-	271	no	-239	239	35	0	0	0	0	0	0	116	115	103	79	75	127	66	116	91	80	73	74	79	167	177	166	270	147	158	0.000254	0.000269	0.000239	0.00022	0.000217	0.000274	0.000229	0.000312	0.000278	0.000295	0.000218	0.000253
279	C4_01870C	ERG8	282	CCATTGGTATAATTGGTCTT	GGG	0	-	270	no	-238	238	35	0	0	0	0	0	0	111	103	111	111	106	116	66	96	75	65	95	71	85	124	155	179	187	130	181	0.000243	0.000241	0.000258	0.000309	0.000306	0.000251	0.000229	0.000259	0.00023	0.00024	0.000283	0.000243
280	C4_01870C	ERG8	283	TTACAAGAATGCAAGACCAT	TGG	0	-	254	no	-222	222	35	0	0	0	0	0	0	3138	3001	3067	2551	2523	3312	2085	3205	2818	2441	2438	2166	2443	5813	5840	6233	6347	3734	5051	0.006813	0.006969	0.007055	0.007032	0.007212	0.007098	0.00712	0.008559	0.008515	0.008894	0.007182	0.007314
281	C4_01870C	ERG8	284	ACAAGTTACACATATAGCTA	TGG	0	-	211	no	-179	179	30	0	0	0	0	0	0	556	572	568	457	439	645	361	497	394	330	438	403	420	781	706	807	1228	695	856	0.001209	0.00133	0.001308	0.001262	0.001257	0.001384	0.001236	0.00133	0.001193	0.001206	0.001293	0.001363
282	C4_01880W	TYR1	285	TTGGCGTGAAAAAAAAAACG	AGG	0	-	116	no	-68	68	35	0	0	0	0	0	0	389	304	368	254	281	333	216	47	62	50	280	231	231	44	69	38	683	422	463	0.000847	0.000708	0.000848	0.000703	0.000806	0.000716	0.000741	0.000128	0.00019	0.000186	0.000827	0.000783
283	C4_01880W	TYR1	286	GGAAAAGCATTTCTTGCTGG	TGG	0	-	254	no	-206	206	45	0	0	0	0	0	0	61	65	73	47	59	99	47	83	54	51	68	56	40	112	118	94	160	81	117	0.000135	0.000153	0.00017	0.000132	0.000171	0.000214	0.000164	0.000224	0.000166	0.000189	0.000203	0.000192
284	C4_01880W	TYR1	287	CCTGGAAAAGCATTTCTTGC	TGG	0	-	251	no	-203	203	45	0	0	0	0	0	0	289	330	294	224	252	298	219	294	253	218	253	203	231	485	402	510	583	431	400	0.000629	0.000768	0.000678	0.00062	0.000723	0.000641	0.000751	0.000788	0.000767	0.000798	0.000748	0.000688
285	C4_01880W	TYR1	288	TGACATTGCCAATTGATGAT	CGG	0	+	216	no	-168	168	35	0	0	0	0	0	0	696	682	646	598	607	694	446	588	560	446	503	445	479	940	1121	1074	1364	805	1031	0.001513	0.001585	0.001488	0.00165	0.001737	0.001489	0.001526	0.001572	0.001695	0.001628	0.001484	0.001505
286	C4_01980C	CLC1	289	ATAAGTTTGTCGTGTGTTTG	AGG	0	-	153	no	-105	105	35	0	0	0	0	0	0	613	595	547	484	470	562	381	522	444	366	469	419	425	850	727	839	1243	803	881	0.001333	0.001384	0.00126	0.001336	0.001346	0.001206	0.001304	0.001396	0.001344	0.001337	0.001384	0.001417
287	C4_01980C	CLC1	290	ATCAAATACTGGGCAAGAGC	GGG	0	-	63	no	-15	15	45	0	0	0	0	0	0	3189	2879	2739	2312	2519	3231	2034	1152	1132	890	2322	1949	2240	890	856	865	5958	3684	4761	0.006924	0.006685	0.0063	0.006373	0.007201	0.006924	0.006946	0.003078	0.003422	0.003245	0.00684	0.006581
288	C4_01980C	CLC1	291	AATCAAATACTGGGCAAGAG	CGG	0	-	62	no	-14	14	40	0	0	0	0	0	0	1098	1062	1111	911	891	1103	720	642	535	422	787	685	854	552	573	643	2062	1207	1658	0.002385	0.002468	0.002557	0.002513	0.002549	0.002365	0.002461	0.001717	0.001619	0.001541	0.00232	0.002315
289	C4_01980C	CLC1	292	TTACATCATTTCCTGTGGAG	TGG	0	-	217	no	-169	169	40	0	0	0	0	0	0	251	222	181	156	154	232	117	166	194	140	147	134	134	325	304	329	462	272	336	0.000547	0.000518	0.000418	0.000433	0.000443	0.000499	0.000403	0.000446	0.000589	0.000514	0.000436	0.000456
290	C4_03200C	C4_03200C	293	TATGTCCGTATCAATCTACG	TGG	0	-	275	no	-217	217	40	0	0	0	0	0	0	207	151	183	149	136	190	158	147	135	132	169	107	147	252	286	294	372	180	299	0.000451	0.000353	0.000423	0.000413	0.000391	0.000409	0.000543	0.000395	0.000411	0.000484	0.000501	0.000364
291	C4_03200C	C4_03200C	294	TCATACCACGTAGATTGATA	CGG	0	+	283	no	-225	225	35	0	0	0	0	0	0	86	72	60	58	63	78	43	52	52	44	53	45	57	92	103	110	150	74	133	0.000189	0.000169	0.00014	0.000163	0.000183	0.000169	0.00015	0.000141	0.00016	0.000164	0.000159	0.000155
292	C4_03200C	C4_03200C	295	TCCGGAATGTCACAGGTAAT	CGG	0	-	225	no	-167	167	45	0	0	0	0	0	0	2693	2537	2605	2266	2090	2762	1797	2284	2052	1788	2026	1785	2024	3838	3967	3880	5528	3422	4211	0.005847	0.005892	0.005992	0.006246	0.005975	0.005919	0.006137	0.0061	0.006201	0.006516	0.005969	0.006028
293	C4_03200C	C4_03200C	296	AGTAAACTCCGGAATGTCAC	AGG	0	-	218	no	-160	160	45	0	0	0	0	0	0	1490	1473	1523	1143	1189	1511	963	1335	1174	957	1099	990	1114	1989	2096	2184	2994	1830	2343	0.003236	0.003422	0.003504	0.003152	0.0034	0.003239	0.003291	0.003567	0.003549	0.003489	0.003239	0.003345
294	C4_03330W	IPK1	297	GTGAAGATCAGGCCCTTCCT	TGG	0	+	103	no	146	146	55	0	0	0	0	0	0	1039	946	853	767	727	865	610	869	735	587	696	602	681	1494	1492	1487	1931	1164	1533	0.002257	0.002198	0.001964	0.002116	0.00208	0.001855	0.002086	0.002323	0.002223	0.002141	0.002052	0.002035
295	C4_03330W	IPK1	298	GGCAAGATATAACCAAGGAA	GGG	0	-	88	no	161	161	40	0	0	0	0	0	0	1661	1493	1449	1257	1171	1600	994	1228	1129	997	1183	962	1200	1819	1811	1986	3016	1838	2283	0.003607	0.003468	0.003334	0.003466	0.003349	0.00343	0.003396	0.003281	0.003413	0.003635	0.003486	0.00325
296	C4_03330W	IPK1	299	GGGCAAGATATAACCAAGGA	AGG	0	-	87	no	162	162	45	0	0	0	0	0	0	1644	1626	1612	1321	1372	1789	1096	1553	1333	1062	1239	1134	1275	2451	2504	2554	3198	1943	2715	0.00357	0.003777	0.003709	0.003643	0.003923	0.003835	0.003744	0.004149	0.004029	0.003871	0.003651	0.003831
297	C4_03330W	IPK1	300	TTTAGGGCAAGATATAACCA	AGG	0	-	83	no	166	166	35	2	0	2	0	2	0	400	421	392	263	316	388	237	301	253	221	305	256	276	468	435	438	707	510	578	0.00087	0.00098	0.000904	0.000727	0.000906	0.000833	0.000812	0.000806	0.000767	0.000809	0.000901	0.000867
298	C4_04260C	FZO1	301	CAAATAGTGTATCCGCAAAT	TGG	0	-	199	no	-66	66	35	2	0	2	0	2	0	239	212	190	205	168	212	161	208	166	147	202	141	194	333	375	344	410	254	368	0.000521	0.000494	0.000439	0.000568	0.000483	0.000456	0.000553	0.000558	0.000504	0.000539	0.000598	0.000479
299	C4_04260C	FZO1	302	ACTGATCACGTGAAAATTCG	GGG	0	+	274	no	-141	141	40	1	0	1	0	1	0	269	238	271	191	229	276	174	231	211	142	196	176	191	340	376	410	445	331	453	0.000586	0.000555	0.000625	0.000529	0.000657	0.000593	0.000597	0.000619	0.00064	0.000521	0.00058	0.000597
300	C4_04260C	FZO1	303	ACGTCTTTCGATAGTGGCAC	TGG	0	-	127	no	6	6	50	0	0	0	0	0	0	183	142	154	106	148	162	97	132	120	98	116	113	108	126	167	151	345	175	250	0.000399	0.000332	0.000356	0.000295	0.000426	0.000349	0.000335	0.000355	0.000365	0.000361	0.000345	0.000385
301	C4_04260C	FZO1	304	TTGAATACGTCTTTCGATAG	TGG	0	-	121	no	12	12	35	0	0	0	0	0	0	173	158	174	126	138	174	111	124	131	120	148	131	102	179	234	233	318	218	188	0.000378	0.000369	0.000402	0.00035	0.000397	0.000375	0.000382	0.000334	0.000399	0.000441	0.000439	0.000445
302	C4_04820C	C4_04820C	305	CATAGTGCGAACAATACTAT	AGG	0	-	191	no	-112	112	35	0	0	0	0	0	0																				2.17052e-06	2.32132e-06	2.29943e-06	2.75534e-06	2.85735e-06	2.14235e-06	3.41339e-06	2.66974e-06	3.02051e-06	3.64201e-06	2.9445e-06	3.37495e-06
303	C4_04820C	C4_04820C	306	TGAAAACTCAATGTTGATAT	TGG	0	-	153	no	-74	74	25	0	0	0	0	0	0	705	744	730	635	567	811	457	687	627	469	617	495	624	976	1181	1165	1438	884	1236	0.001532	0.001729	0.001681	0.001752	0.001623	0.00174	0.001563	0.001837	0.001897	0.001712	0.00182	0.001674
304	C4_04820C	C4_04820C	307	TGGAATATTTGGGTGCGGGA	AGG	0	+	58	no	21	21	50	0	0	0	0	0	0	1982	1713	1867	1475	1458	1956	1233	1670	1364	1152	1509	1198	1404	2652	2869	2869	3850	2343	3029	0.004304	0.003979	0.004295	0.004067	0.004169	0.004193	0.004212	0.004461	0.004123	0.004199	0.004446	0.004047
305	C4_04820C	C4_04820C	308	CTATAGTATTGTTCGCACTA	TGG	0	+	193	no	-114	114	35	0	0	0	0	0	0	20	9	4	7	13	16	13	12	12	7	12	5	12	13	23	8	35	17	19	4.55808e-05	2.32132e-05	1.14972e-05	2.20428e-05	4.00029e-05	3.642e-05	4.77874e-05	3.47066e-05	3.92666e-05	2.9136e-05	3.82785e-05	2.02497e-05
306	C5_00770C	FOL1	309	AATTTGATGCTACCACTACG	AGG	0	+	273	no	-133	133	40	2	0	2	0	2	0	89	86	102	74	86	140	48	79	75	46	77	63	55	123	130	139	170	105	159	0.000195	0.000202	0.000237	0.000207	0.000249	0.000302	0.000167	0.000214	0.00023	0.000171	0.00023	0.000216
307	C5_00770C	FOL1	310	TTGGAGGAAAAGTGGGGCGG	AGG	0	-	117	no	23	23	60	1	0	1	0	1	0	234	171	172	128	146	189	119	158	172	134	161	148	151	236	334	306	407	286	338	0.00051	0.000399	0.000398	0.000355	0.00042	0.000407	0.00041	0.000424	0.000523	0.000492	0.000477	0.000503
308	C5_00770C	FOL1	311	TAATTGGAGGAAAAGTGGGG	CGG	0	-	114	no	26	26	45	0	0	0	0	0	0	101	100	68	77	71	104	65	52	51	34	65	60	58	65	77	88	186	121	169	0.000221	0.000234	0.000159	0.000215	0.000206	0.000225	0.000225	0.000141	0.000157	0.000127	0.000194	0.000206
309	C5_00770C	FOL1	312	GGTATTAAATTGGTTCCAAG	AGG	0	+	252	no	-112	112	35	0	0	0	0	0	0	3196	3214	3064	2533	2544	3289	2049	2896	2563	2083	2461	2123	2502	4495	4722	4852	6289	3798	5025	0.006939	0.007463	0.007048	0.006982	0.007272	0.007048	0.006997	0.007734	0.007745	0.00759	0.007249	0.007168
310	C5_00790C	C5_00790C	313	CCATCCCCCAAAAGAGTAAA	AGG	0	+	279	no	339	339	45	0	0	0	0	0	0	4709	4286	4424	3523	3454	4496	2851	3855	3379	2743	3378	2839	3402	6054	6375	6648	9011	5458	7000	0.0102231	0.009952	0.010175	0.00971	0.009872	0.009634	0.009735	0.0102945	0.0102093	0.009994	0.009949	0.009585
311	C5_00790C	C5_00790C	314	AAAGTTACCAACCAGTAAAT	TGG	0	+	245	no	373	373	30	0	0	0	0	0	0	31	27	45	20	28	28	12	39	24	23	25	23	27	35	42	31	51	43	50	6.94565e-05	6.4997e-05	0.000106	5.78622e-05	8.28631e-05	6.21282e-05	4.43741e-05	0.000107	7.55127e-05	8.74081e-05	7.65571e-05	8.09987e-05
312	C5_00790C	C5_00790C	315	CGATGGAACTACCAATTTAC	TGG	0	-	231	no	387	387	40	0	0	0	0	0	0	3	2	1						2											8.68206e-06	6.96397e-06	4.59886e-06	2.75534e-06	2.85735e-06	2.14235e-06	3.41339e-06	2.66974e-06	9.06153e-06	3.64201e-06	2.9445e-06	3.37495e-06
313	C5_00790C	C5_00790C	316	TAGTAGTTTGGATTTGACGA	TGG	0	-	214	no	404	404	35	0	0	0	0	0	0	1664	1558	1504	1286	1199	1566	1012	1422	1143	1046	1203	1021	1155	2173	2221	2275	3108	1926	2553	0.003614	0.003619	0.003461	0.003546	0.003429	0.003357	0.003458	0.003799	0.003455	0.003813	0.003545	0.003449
314	C5_01240W	AUR1	317	AATGTAGCGGGGAAGAGGAG	AGG	0	-	249	no	104	104	55	0	0	0	0	0	0	1483	1299	1304	992	1096	1371	908	651	615	517	1016	912	995	594	712	770	2718	1703	2224	0.003221	0.003018	0.003001	0.002736	0.003135	0.002939	0.003103	0.001741	0.001861	0.001887	0.002995	0.003081
315	C5_01240W	AUR1	318	GTTCTAATGTAGCGGGGAAG	AGG	0	-	244	no	109	109	50	0	0	0	0	0	0	228	197	232	219	179	193	132	195	205	142	184	142	177	290	280	365	451	292	376	0.000497	0.00046	0.000536	0.000606	0.000514	0.000416	0.000454	0.000523	0.000622	0.000521	0.000545	0.000483
316	C5_01240W	AUR1	319	ATGGTGGTTCTAATGTAGCG	GGG	0	-	238	no	115	115	45	0	0	0	0	0	0	260	194	226	170	196	258	150	207	208	147	163	140	186	280	348	344	453	236	374	0.000567	0.000453	0.000522	0.000471	0.000563	0.000555	0.000515	0.000555	0.000631	0.000539	0.000483	0.000476
317	C5_01240W	AUR1	320	AATGGTGGTTCTAATGTAGC	GGG	0	-	237	no	116	116	40	0	0	0	0	0	0	187	142	164	160	133	172	124	152	138	88	124	93	103	229	288	227	363	190	223	0.000408	0.000332	0.000379	0.000444	0.000383	0.000371	0.000427	0.000408	0.00042	0.000324	0.000368	0.000317
318	C5_01460W	YBL053	321	CAACGCGTTGTTTATTTCTG	TGG	0	+	74	no	23	23	40	0	0	0	0	0	0	41	47	45	22	24	40	23	22	17	35	28	17	30	38	33	50	54	42	59	9.11617e-05	0.000111	0.000106	6.33729e-05	7.14337e-05	8.78364e-05	8.19213e-05	6.14039e-05	5.43692e-05	0.000131	8.53906e-05	6.0749e-05
319	C5_01460W	YBL053	322	ACAATGCTAGGATATGATGA	TGG	0	-	15	no	82	82	35	1	0	0	0	0	0	293	266	261	216	200	292	162	193	163	161	214	186	219	332	295	363	570	336	466	0.000638	0.00062	0.000602	0.000598	0.000574	0.000628	0.000556	0.000518	0.000495	0.00059	0.000633	0.000631
320	C5_01460W	YBL053	323	GAATTCTCAGGCTGGTCCAT	AGG	0	-	253	no	-156	156	50	1	0	0	0	0	0	90	119	129	92	126	146	90	103	109	96	91	85	82	166	173	217	234	152	200	0.000198	0.000279	0.000299	0.000256	0.000363	0.000315	0.000311	0.000278	0.000332	0.000353	0.000271	0.00029
321	C5_01460W	YBL053	324	TGTCTAAGGAATTCTCAGGC	TGG	0	-	245	no	-148	148	45	0	0	0	0	0	0	1160	1147	1130	984	891	1256	763	1071	1022	897	939	791	892	1854	1862	1892	2483	1496	1977	0.00252	0.002665	0.002601	0.002714	0.002549	0.002693	0.002608	0.002862	0.00309	0.003271	0.002768	0.002673
322	C5_01720C	RCY1	325	GTTGATTGATGACTGATGGT	GGG	0	-	186	no	31	31	40	0	0	0	0	0	0	180	202	196	163	160	207	118	182	166	122	152	136	140	267	336	281	418	246	278	0.000393	0.000471	0.000453	0.000452	0.00046	0.000446	0.000406	0.000489	0.000504	0.000448	0.000451	0.000462
323	C5_01720C	RCY1	326	AGTTGATTGATGACTGATGG	TGG	0	-	185	no	32	32	40	0	0	0	0	0	0	2190	2128	2102	1815	1691	2230	1433	2001	1771	1387	1623	1450	1646	3298	3262	3347	4209	2696	3240	0.004756	0.004942	0.004836	0.005004	0.004835	0.00478	0.004895	0.005345	0.005352	0.005055	0.004782	0.004897
324	C5_01720C	RCY1	327	GATAGTTGATTGATGACTGA	TGG	0	-	182	no	35	35	35	0	0	0	0	0	0	194	196	249	200	185	271	172	199	162	139	154	151	200	258	298	348	410	259	306	0.000423	0.000457	0.000575	0.000554	0.000531	0.000583	0.000591	0.000534	0.000492	0.00051	0.000456	0.000513
325	C5_01720C	RCY1	328	AAAGTAATATCTTAACGCAA	TGG	0	-	158	no	59	59	25	1	0	1	1	1	1	238	267	303	232	223	275	192	250	190	165	215	211	244	344	386	438	531	371	457	0.000519	0.000622	0.000699	0.000642	0.00064	0.000591	0.000659	0.00067	0.000577	0.000605	0.000636	0.000715
326	C5_02900W	SPT8	329	ATTCTCTGGCTTGCTGGCTT	TGG	0	-	146	no	-121	121	50	1	0	1	1	1	1	128	105	93	80	74	113	66	90	86	59	79	66	89	141	154	124	207	125	193	0.00028	0.000246	0.000216	0.000223	0.000214	0.000244	0.000229	0.000243	0.000263	0.000219	0.000236	0.000226
327	C5_02900W	SPT8	330	TCAACAATTCTCTGGCTTGC	TGG	0	-	140	no	-115	115	45	1	0	1	1	1	1	604	524	548	419	397	509	356	474	409	331	401	358	394	779	773	875	1017	622	741	0.001313	0.001219	0.001262	0.001157	0.001137	0.001093	0.001219	0.001268	0.001238	0.001209	0.001184	0.001212
328	C5_02900W	SPT8	331	TTTGGGTGTCGCAGAATCAA	CGG	0	+	101	no	-76	76	45	0	0	0	0	0	0	894	786	819	782	629	913	518	756	698	572	678	553	695	1478	1361	1451	1593	1102	1420	0.001943	0.001827	0.001886	0.002157	0.0018	0.001958	0.001772	0.002021	0.002111	0.002087	0.001999	0.00187
329	C5_02900W	SPT8	332	TTAATCCAACTACAAAATGT	TGG	0	+	202	no	-177	177	25	0	0	0	0	0	0	632	709	677	558	530	682	399	537	500	403	518	446	496	837	871	946	1318	731	954	0.001374	0.001648	0.001559	0.00154	0.001517	0.001463	0.001365	0.001436	0.001513	0.001471	0.001528	0.001509
330	C5_05190W	PCL5	333	TTAGGAGCGGGAGTGGGAGC	AGG	0	-	31	no	132	132	65	0	0	0	0	0	0	2618	2448	2584	2023	1995	2561	1670	2273	2014	1717	1865	1560	1955	3708	3774	3932	5187	3309	4255	0.005685	0.005685	0.005944	0.005577	0.005703	0.005489	0.005704	0.006071	0.006086	0.006257	0.005494	0.005268
331	C5_05190W	PCL5	334	AAACAGTTAGGAGCGGGAGT	GGG	0	-	25	no	138	138	50	0	0	0	0	0	0	339	339	407	288	269	379	241	315	290	231	267	200	288	413	546	504	686	377	563	0.000738	0.000789	0.000938	0.000796	0.000771	0.000814	0.000826	0.000844	0.000879	0.000845	0.000789	0.000678
332	C5_05190W	PCL5	335	AAAACAGTTAGGAGCGGGAG	TGG	0	-	24	no	139	139	50	0	0	0	0	0	0	163	135	177	152	139	148	122	134	141	108	122	129	137	330	286	302	343	188	270	0.000356	0.000316	0.000409	0.000422	0.0004	0.000319	0.00042	0.00036	0.000429	0.000397	0.000362	0.000439
333	C5_05190W	PCL5	336	AGAAGGAAAACAGTTAGGAG	CGG	0	-	18	no	145	145	40	0	0	0	0	0	0	3652	3441	3683	3085	2847	3938	2412	3269	2876	2325	2918	2506	2780	5034	5575	5396	7517	4512	5669	0.007929	0.00799	0.008471	0.008503	0.008138	0.008439	0.008237	0.00873	0.00869	0.008471	0.008595	0.008461
334	C5_05410C	ILV3	337	TGTGGATGGGTACATGATCT	GGG	0	-	208	no	-205	205	45	0	0	0	0	0	0	2481	2377	2339	2020	1889	2450	1569	2203	1827	1609	1741	1650	1848	3269	3422	3787	4966	2930	3934	0.005387	0.00552	0.005381	0.005569	0.0054	0.005251	0.005359	0.005884	0.005521	0.005864	0.005129	0.005572
335	C5_05410C	ILV3	338	TGGCTGGATCCAGTCAATCC	AGG	0	-	259	no	-256	256	55	0	0	0	0	0	0	86	64	78	56	56	67	55	45	62	55	46	46	50	90	134	129	177	79	128	0.000189	0.000151	0.000182	0.000157	0.000163	0.000146	0.000191	0.000123	0.00019	0.000204	0.000138	0.000159
336	C5_05410C	ILV3	339	ACAAGGAACCGGATTTCCCT	TGG	0	-	239	no	-236	236	50	0	0	0	0	0	0	102	130	94	83	70	112	67	101	87	62	84	76	71	127	176	147	195	157	173	0.000224	0.000304	0.000218	0.000231	0.000203	0.000242	0.000232	0.000272	0.000266	0.000229	0.00025	0.00026
337	C5_05410C	ILV3	340	GGATGGGTACATGATCTGGG	TGG	0	-	211	no	-208	208	55	0	0	0	0	0	0	1061	784	860	740	735	871	621	372	355	326	656	577	663	216	214	272	1788	1072	1405	0.002305	0.001822	0.00198	0.002042	0.002103	0.001868	0.002123	0.000996	0.001075	0.001191	0.001935	0.001951
338	C6_00870C	ILV5	341	GCTGTCCCACTCAACTGAGG	TGG	0	-	166	no	-114	114	60	0	0	0	0	0	0	636	560	573	538	509	665	451	376	335	309	475	417	483	265	240	322	1452	754	1053	0.001383	0.001302	0.00132	0.001485	0.001457	0.001427	0.001543	0.001006	0.001015	0.001129	0.001402	0.001411
339	C6_00870C	ILV5	342	TTTGCTGTCCCACTCAACTG	AGG	0	-	163	no	-111	111	50	1	0	0	0	1	0	254	224	219	223	162	269	150	183	201	146	195	144	192	324	352	377	426	269	417	0.000553	0.000522	0.000506	0.000617	0.000466	0.000578	0.000515	0.000491	0.00061	0.000535	0.000577	0.000489
340	C6_00870C	ILV5	343	AATCTGCGCTATTCCGCTAC	AGG	0	+	260	no	-208	208	50	0	0	0	0	0	0																				2.17052e-06	2.32132e-06	2.29943e-06	2.75534e-06	2.85735e-06	2.14235e-06	3.41339e-06	2.66974e-06	3.02051e-06	3.64201e-06	2.9445e-06	3.37495e-06
341	C6_00870C	ILV5	344	GCGCGATGCAGGCCCTGTAG	CGG	0	-	244	no	-192	192	70	0	0	0	0	0	0	173	172	165	126	133	171	117	161	156	108	145	125	135	239	271	293	395	247	180	0.000378	0.000402	0.000382	0.00035	0.000383	0.000368	0.000403	0.000432	0.000474	0.000397	0.00043	0.000425
342	C6_01280W	EXO84	345	AATTTAGTGTTGTTACCGTT	CGG	0	-	197	no	-138	138	30	0	0	0	0	0	0	118	103	109	81	71	105	72	86	53	65	69	79	88	132	164	140	230	150	167	0.000258	0.000241	0.000253	0.000226	0.000206	0.000227	0.000249	0.000232	0.000163	0.00024	0.000206	0.00027
343	C6_01280W	EXO84	346	TTGATAACTCGTGCACGACA	TGG	0	-	127	no	-68	68	45	0	0	0	0	0	0	64	54	47	26	42	46	29	46	42	36	45	26	39	67	72	78	95	62	98	0.000141	0.000128	0.00011	7.43943e-05	0.000123	0.000101	0.000102	0.000125	0.00013	0.000135	0.000135	9.11236e-05
344	C6_01280W	EXO84	347	ATAGTGTAAAGCGTTCTCAT	TGG	0	+	245	no	-186	186	35	0	0	0	0	0	0	110	98	97	63	86	97	61	65	65	53	56	69	72	118	136	119	190	109	155	0.000241	0.00023	0.000225	0.000176	0.000249	0.00021	0.000212	0.000176	0.000199	0.000197	0.000168	0.000236
345	C6_01280W	EXO84	348	ATGAGAACGCTTTACACTAT	TGG	0	-	245	no	-186	186	35	0	0	0	0	0	0	49	46	43	25	50	61	35	64	33	33	33	38	44	62	59	88	103	72	72	0.000109	0.000109	0.000101	7.1639e-05	0.000146	0.000133	0.000123	0.000174	0.000103	0.000124	0.0001	0.000132
346	C6_01980C	C6_01980C	349	TGTTTGATATTCTTGATTCC	TGG	0	-	84	no	-14	14	30	1	0	1	0	1	0	458	462	446	372	372	447	305	340	327	281	357	271	355	489	497	554	946	547	639	0.000996	0.001075	0.001028	0.001028	0.001066	0.00096	0.001044	0.00091	0.000991	0.001027	0.001054	0.000918
347	C6_01980C	C6_01980C	350	ATCACGGCCAAGACAAGCCA	CGG	0	+	242	yes	-172	172	55	0	0	0	0	0	0	2677	2431	2378	2109	2008	2710	1716	2603	2232	1825	1971	1815	1992	4617	4679	4673	5385	3062	4229	0.005813	0.005645	0.00547	0.005814	0.00574	0.005808	0.005861	0.006952	0.006745	0.00665	0.005807	0.006129
348	C6_01980C	C6_01980C	351	TGCCATACCGTGGCTTGTCT	TGG	0	-	232	no	-162	162	55	1	0	1	0	1	0	2452	2397	2407	2024	1979	2550	1733	2034	1926	1577	1832	1598	1803	3392	3640	3686	4690	2876	3718	0.005324	0.005567	0.005537	0.00558	0.005658	0.005465	0.005919	0.005433	0.005821	0.005747	0.005397	0.005397
349	C6_01980C	C6_01980C	352	CTAAAAGCGTTGCCATACCG	TGG	0	-	222	no	-152	152	50	0	0	0	0	0	0	91	87	80	85	56	83	63	68	72	69	57	66	59	114	82	114	184	115	101	0.0002	0.000204	0.000186	0.000237	0.000163	0.00018	0.000218	0.000184	0.00022	0.000255	0.000171	0.000226
350	C6_02370C	C6_02370C	353	AAAAAATTTTTTTTCATATT	GGG	0	+	150	no	-120	120	5	1	0	0	0	0	0	1243	1262	1247	991	931	1351	783	1149	914	691	1049	822	1031	1560	1676	1609	2259	1440	1836	0.0027	0.002932	0.00287	0.002733	0.002663	0.002896	0.002676	0.00307	0.002764	0.00252	0.003092	0.002778
351	C6_02370C	C6_02370C	354	CATATTGGGTCGTGCATTAT	TGG	0	+	136	no	-106	106	40	0	0	0	0	0	0	61	64	73	71	54	68	52	91	72	66	63	52	67	92	135	133	157	85	108	0.000135	0.000151	0.00017	0.000198	0.000157	0.000148	0.000181	0.000246	0.00022	0.000244	0.000188	0.000179
352	C6_02370C	C6_02370C	355	ATATTTATTCGTGAAGGTTG	CGG	0	-	18	no	12	12	30	0	0	0	0	0	0	346	332	298	225	255	361	197	311	247	203	257	237	262	466	563	480	604	401	513	0.000753	0.000773	0.000688	0.000623	0.000731	0.000776	0.000676	0.000833	0.000749	0.000743	0.00076	0.000803
353	C6_02370C	C6_02370C	356	GGATGAATATTTATTCGTGA	AGG	0	-	12	no	18	18	30	1	0	0	0	0	0	57	31	41	39	38	46	32	36	31	36	40	32	39	53	62	63	104	41	79	0.000126	7.42823e-05	9.65761e-05	0.00011	0.000111	0.000101	0.000113	9.87802e-05	9.66563e-05	0.000135	0.000121	0.000111
354	C6_02570C	SEC20	357	TGTCTCTAGTCAGGATCAAC	TGG	0	-	94	no	-78	78	45	1	0	0	0	0	0	43	40	26	43	10	35	36	16	13	9	22	18	39	13	13	19	71	27	43	9.55027e-05	9.51742e-05	6.20847e-05	0.000121	3.14308e-05	7.71246e-05	0.000126	4.53855e-05	4.22871e-05	3.64201e-05	6.77235e-05	6.4124e-05
355	C6_02570C	SEC20	358	TTTGTTCGGTGTCTCTAGTC	AGG	0	-	85	no	-69	69	45	2	0	0	0	0	0	107	61	85	69	40	67	54	83	69	61	61	45	51	137	104	147	126	86	128	0.000234	0.000144	0.000198	0.000193	0.000117	0.000146	0.000188	0.000224	0.000211	0.000226	0.000183	0.000155
356	C6_02570C	SEC20	359	TATAGCTAATACTTCGAAAC	CGG	0	-	272	no	-256	256	30	0	0	0	0	0	0	323	300	273	244	219	301	185	258	220	185	195	191	233	416	356	470	608	354	339	0.000703	0.000699	0.00063	0.000675	0.000629	0.000647	0.000635	0.000691	0.000668	0.000677	0.000577	0.000648
357	C6_02570C	SEC20	360	AGTAATTTGTCTAATGGGGC	TGG	0	-	246	no	-230	230	40	0	0	0	0	0	0	833	838	883	740	679	874	558	823	695	550	669	590	708	1295	1159	1423	1804	1095	1457	0.00181	0.001948	0.002033	0.002042	0.001943	0.001875	0.001908	0.0022	0.002102	0.002007	0.001973	0.001995
358	C6_03110C	C6_03110C	361	GGCTGCATTCAAACGTTCTT	TGG	0	+	279	no			45	0	0	0	0	0	0	481	441	450	355	341	463	268	372	387	296	340	313	283	625	681	568	836	471	626	0.001046	0.001026	0.001037	0.000981	0.000977	0.000994	0.000918	0.000996	0.001172	0.001082	0.001004	0.00106
359	C6_03110C	C6_03110C	362	GATCTCTCAGGACTGCCATA	TGG	0	+	229	no			50	0	0	0	0	0	0	266	341	275	291	210	350	235	308	239	193	283	207	249	489	431	499	587	432	520	0.00058	0.000794	0.000635	0.000805	0.000603	0.000752	0.000806	0.000825	0.000725	0.000707	0.000836	0.000702
360	C6_03110C	C6_03110C	363	GGACTGCCATATGGTCTATA	AGG	0	+	220	no			45	0	0	0	0	0	0	133	137	159	90	123	163	95	141	118	105	114	89	115	222	216	251	246	164	263	0.000291	0.00032	0.000368	0.000251	0.000354	0.000351	0.000328	0.000379	0.000359	0.000386	0.000339	0.000304
361	C6_03110C	C6_03110C	364	GACTGCCATATGGTCTATAA	GGG	0	+	219	no			40	0	0	0	0	0	0	53	53	59	63	35	78	34	42	40	40	42	23	26	78	86	71	152	72	91	0.000117	0.000125	0.000138	0.000176	0.000103	0.000169	0.000119	0.000115	0.000124	0.000149	0.000127	8.09987e-05
362	C6_04120C	C6_04120C	365	GAATTGATACATTATACTAT	CGG	0	+	163	no	47	47	20	0	0	0	0	0	0	23	25	19	20	12	22	24	12	12	7	14	12	14	38	16	35	33	21	32	5.20924e-05	6.03544e-05	4.59886e-05	5.78622e-05	3.71455e-05	4.92741e-05	8.53347e-05	3.47066e-05	3.92666e-05	2.9136e-05	4.41675e-05	4.38743e-05
363	C6_04120C	C6_04120C	366	TAGCATTACATCACACTAAA	AGG	0	+	285	no	-75	75	30	0	0	0	0	0	0	1048	968	1047	855	793	1143	700	949	764	649	795	733	822	1401	1463	1454	1991	1177	1392	0.002277	0.002249	0.00241	0.002359	0.002269	0.002451	0.002393	0.002536	0.002311	0.002367	0.002344	0.002477
364	C6_04120C	C6_04120C	367	TTGTTGTTTGTGGTTGTCTG	TGG	0	-	224	yes	-14	14	40	0	0	0	0	0	0	138	101	112	102	88	109	83	101	72	62	90	87	89	124	134	182	181	109	129	0.000302	0.000237	0.00026	0.000284	0.000254	0.000236	0.000287	0.000272	0.00022	0.000229	0.000268	0.000297
365	C6_04120C	C6_04120C	368	GTTGTTGTTGTTGTTGTTTG	TGG	0	-	214	no	-4	4	35	0	0	0	0	0	0	716	645	615	600	490	636	437	596	492	455	506	481	472	947	893	809	1291	879	1033	0.001556	0.0015	0.001416	0.001656	0.001403	0.001365	0.001495	0.001594	0.001489	0.001661	0.001493	0.001627
366	C7_00210C	C7_00210C	369	GGACTGGATTTAAACATGGT	TGG	0	+	92	no	-85	85	40	0	0	0	0	0	0	214	160	170	163	182	195	120	114	83	82	130	132	163	23	33	46	344	204	241	0.000467	0.000374	0.000393	0.000452	0.000523	0.00042	0.000413	0.000307	0.000254	0.000302	0.000386	0.000449
367	C7_00210C	C7_00210C	370	TCTCATCCCCGGACTTAACT	TGG	0	+	271	no	-264	264	50	1	0	1	0	1	0	704	739	675	634	548	731	513	676	585	491	535	489	595	995	1056	1204	1482	931	1221	0.00153	0.001718	0.001554	0.00175	0.001569	0.001568	0.001754	0.001807	0.00177	0.001792	0.001578	0.001654
368	C7_00210C	C7_00210C	371	CTTTCTTGGCAGGCTCGTAG	GGG	0	+	214	no	-207	207	55	0	0	0	0	0	0	185	191	175	152	155	181	93	188	129	122	135	131	133	266	274	326	320	226	290	0.000404	0.000446	0.000405	0.000422	0.000446	0.00039	0.000321	0.000505	0.000393	0.000448	0.0004	0.000445
369	C7_00210C	C7_00210C	372	CTACGAGCCTGCCAAGAAAG	TGG	0	-	214	no	-207	207	55	0	0	0	0	0	0	15	16	15	7	17	5	9	13	15	8	11	8	8	24	21	17	11	15	18	3.47283e-05	3.94625e-05	3.67909e-05	2.20428e-05	5.14322e-05	1.28541e-05	3.41339e-05	3.73763e-05	4.83281e-05	3.2778e-05	3.5334e-05	3.03745e-05
370	C7_00730W	MET28	373	CTCTCTCTCTCTTCTTATTT	CGG	0	+	169	no	-97	97	35	0	0	2	0	2	0	190	162	143	91	113	162	88	113	117	104	102	103	95	193	236	237	321	181	238	0.000415	0.000378	0.000331	0.000253	0.000326	0.000349	0.000304	0.000304	0.000356	0.000382	0.000303	0.000351
371	C7_00730W	MET28	374	TCTCTCTCTCTTCTTATTTC	GGG	0	+	168	no	-96	96	35	0	0	1	0	1	0	1120	734	792	648	607	844	494	617	526	398	488	410	495	685	856	700	1081	625	790	0.002433	0.001706	0.001823	0.001788	0.001737	0.00181	0.00169	0.00165	0.001592	0.001453	0.00144	0.001387
372	C7_00730W	MET28	375	TAAGCGAATAAAGGGAAGAA	AGG	0	-	78	no	-6	6	35	0	0	1	0	1	0	4308	4089	4059	3319	3221	4265	2684	3387	2840	2435	3269	2792	3123	4510	4936	5149	8149	5127	6411	0.009353	0.009494	0.009336	0.009148	0.009206	0.009139	0.009165	0.009045	0.008581	0.008872	0.009629	0.009426
373	C7_00730W	MET28	376	GAATAAGAACTAATTGGTAA	AGG	0	-	34	no	38	38	25	0	0	0	0	0	0	2101	1922	1966	1628	1634	2180	1322	1424	1244	1053	1508	1308	1550	1918	1924	1977	3723	2411	3033	0.004562	0.004464	0.004523	0.004488	0.004672	0.004672	0.004516	0.003804	0.003761	0.003839	0.004443	0.004418
374	C7_01180W	MDM12	377	ACTCAGCTAGTTCTGCTTGT	TGG	0	+	179	no	-126	126	45	0	0	0	0	0	0	33	36	24	30	36	27	20	28	24	25	22	23	32	44	38	47	80	31	45	7.37975e-05	8.58889e-05	5.74858e-05	8.54157e-05	0.000106	5.99858e-05	7.16812e-05	7.74223e-05	7.55127e-05	9.46921e-05	6.77235e-05	8.09987e-05
375	C7_01180W	MDM12	378	CTAGTTCTGCTTGTTGGTAC	TGG	0	+	173	no	-120	120	45	0	0	0	0	0	0	40	31	53	38	58	63	29	47	41	41	33	32	41	73	62	79	135	67	65	8.89911e-05	7.42823e-05	0.000124	0.000107	0.000169	0.000137	0.000102	0.000128	0.000127	0.000153	0.0001	0.000111
376	C7_01180W	MDM12	379	AACTGGGTGTTGTCATCGGT	TGG	0	-	29	no	24	24	50	0	0	0	0	0	0																				2.17052e-06	2.32132e-06	2.29943e-06	2.75534e-06	2.85735e-06	2.14235e-06	3.41339e-06	2.66974e-06	3.02051e-06	3.64201e-06	2.9445e-06	3.37495e-06
377	C7_01180W	MDM12	380	CGTTAACTGGGTGTTGTCAT	CGG	0	-	25	no	28	28	45	0	0	0	0	0	0	157	174	177	139	135	177	108	139	121	143	130	131	129	247	242	298	336	195	295	0.000343	0.000406	0.000409	0.000386	0.000389	0.000381	0.000372	0.000374	0.000369	0.000524	0.000386	0.000445
378	C7_01650W	C7_01650W	381	TTGATGTTTGAGTGAGGAAT	TGG	0	-	127	no	-52	52	35	0	0	0	0	0	0	217	184	172	153	128	168	104	129	106	85	108	111	125	129	150	124	311	208	241	0.000473	0.000429	0.000398	0.000424	0.000369	0.000362	0.000358	0.000347	0.000323	0.000313	0.000321	0.000378
379	C7_01650W	C7_01650W	382	GTTTGATTGATGTTTGAGTG	AGG	0	-	121	no	-46	46	35	0	0	0	0	0	0	80	71	84	62	51	73	55	48	72	57	51	50	69	94	97	142	179	63	118	0.000176	0.000167	0.000195	0.000174	0.000149	0.000159	0.000191	0.000131	0.00022	0.000211	0.000153	0.000172
380	C7_01650W	C7_01650W	383	TGAATCACACATTGCGTAAC	TGG	0	+	225	no	-150	150	40	0	0	0	0	0	0	567	517	541	454	465	599	342	445	446	324	397	363	402	711	747	741	1075	682	853	0.001233	0.001202	0.001246	0.001254	0.001332	0.001285	0.001171	0.001191	0.00135	0.001184	0.001172	0.001228
381	C7_01650W	C7_01650W	384	GCTAGTTAGGAGAACAAAAG	TGG	0	+	405	no	-330	330	40	0	0	0	0	0	0	6222	6203	6257	5213	4859	6485	4161	5741	5000	4213	4921	4246	5012	8755	8910	9517	12422	7595	9840	0.0135071	0.0144015	0.0143898	0.0143664	0.0138867	0.0138953	0.0142065	0.0153296	0.0151056	0.015347	0.0144928	0.0143334
382	C7_02060W	LIG1	385	CGAAGCACACGACCGTCTTG	TGG	0	+	131	no	-78	78	60	0	0	0	0	0	0	271	222	194	152	163	239	139	171	186	150	139	132	174	327	310	306	427	274	331	0.00059	0.000518	0.000448	0.000422	0.000469	0.000514	0.000478	0.000459	0.000565	0.00055	0.000412	0.000449
383	C7_02060W	LIG1	386	AAAGTTTGACTCATCGATTT	CGG	0	+	91	no	-38	38	30	0	0	0	0	0	0	931	880	776	668	668	880	564	763	684	518	632	578	679	1039	1279	1235	1665	1016	1320	0.002023	0.002045	0.001787	0.001843	0.001912	0.001887	0.001929	0.00204	0.002069	0.00189	0.001864	0.001954
384	C7_02060W	LIG1	387	AAACTAGACGTGTAGAAGAA	GGG	0	-	24	no	29	29	35	0	0	0	0	0	0	500	474	436	381	384	512	283	333	266	261	378	375	377	373	411	388	916	586	749	0.001087	0.001103	0.001005	0.001053	0.0011	0.001099	0.000969	0.000892	0.000806	0.000954	0.001116	0.001269
385	C7_02060W	LIG1	388	GGATTAAATTCCCACAATTG	TGG	0	-	253	no	-200	200	35	0	0	0	0	0	0	2572	2710	2616	2165	2021	2822	1680	2363	1987	1696	2001	1833	2049	3810	3877	4085	5483	3397	4202	0.005585	0.006293	0.006018	0.005968	0.005778	0.006048	0.005738	0.006311	0.006005	0.00618	0.005895	0.00619
386	C7_02680W	TOM22	389	TTTCTTCTTTCTACAATTTG	TGG	0	+	119	no	-64	64	25	0	0	0	0	0	0	31	28	39	37	27	42	27	36	25	16	42	27	29	42	47	62	86	38	48	6.94565e-05	6.73183e-05	9.19773e-05	0.000105	8.00057e-05	9.21211e-05	9.55749e-05	9.87802e-05	7.85332e-05	6.19141e-05	0.000127	9.44985e-05
387	C7_02680W	TOM22	390	TTCTTCTTTCTACAATTTGT	GGG	0	+	118	no	-63	63	25	0	0	0	0	0	0	300	303	326	239	277	355	206	293	233	206	239	210	257	339	406	391	599	388	467	0.000653	0.000706	0.000752	0.000661	0.000794	0.000763	0.000707	0.000785	0.000707	0.000754	0.000707	0.000712
388	C7_02680W	TOM22	391	CAAATCAAAAAATTTGTAGT	TGG	0	-	78	no	-23	23	20	0	0	0	0	0	0	8	5	4	4	5	1	1		2	1	4		1	6	3		7	2	10	1.95346e-05	1.39279e-05	1.14972e-05	1.37767e-05	1.71441e-05	4.2847e-06	6.82678e-06	2.66974e-06	9.06153e-06	7.28401e-06	1.47225e-05	3.37495e-06
389	C7_02680W	TOM22	392	AACGATAATAGTATTCAAGA	TGG	0	+	211	no	-156	156	25	0	0	0	0	0	0	490	477	432	356	364	500	295	447	349	283	337	330	373	584	528	695	904	603	717	0.001066	0.00111	0.000996	0.000984	0.001043	0.001073	0.00101	0.001196	0.001057	0.001034	0.000995	0.001117
390	C7_02770W	CHS1	393	TAATTATATCAAAATTGGAA	TGG	0	+	168	no	-113	113	15	0	0	0	0	0	0	32	48	47	20	47	35	22	41	17	37	18	20	28	51	39	51	57	45	35	7.1627e-05	0.000114	0.00011	5.78622e-05	0.000137	7.71246e-05	7.85079e-05	0.000112	5.43692e-05	0.000138	5.59455e-05	7.08739e-05
391	C7_02770W	CHS1	394	GTATTCTGGAAATTTAAATA	AGG	0	-	30	no	25	25	20	0	0	0	0	0	0	16	29	18	23	25	24	21	23	13	16	18	13	17	22	29	44	43	16	28	3.68988e-05	6.96397e-05	4.36892e-05	6.61283e-05	7.4291e-05	5.35588e-05	7.50946e-05	6.40736e-05	4.22871e-05	6.19141e-05	5.59455e-05	4.72492e-05
392	C7_02770W	CHS1	395	ATGTAGTTTAAAGGGTATTC	TGG	0	-	16	no	39	39	30	0	0	0	0	0	0																				2.17052e-06	2.32132e-06	2.29943e-06	2.75534e-06	2.85735e-06	2.14235e-06	3.41339e-06	2.66974e-06	3.02051e-06	3.64201e-06	2.9445e-06	3.37495e-06
393	C7_02770W	CHS1	396	CTTAGATTGTAAGAGAGCAT	TGG	0	+	285	no	-230	230	35	0	0	0	0	0	0	1214	1228	1215	967	986	1241	815	1008	916	768	920	899	941	1558	1689	1789	2327	1572	1856	0.002637	0.002853	0.002796	0.002667	0.00282	0.002661	0.002785	0.002694	0.00277	0.002801	0.002712	0.003037
394	C7_02950C	DBF4	397	TCCATCTAACTTCTTGAAAC	AGG	0	+	58	no	-8	8	35	0	0	0	0	0	0	585	437	486	394	454	519	339	355	361	259	354	320	355	602	623	625	803	529	630	0.001272	0.001017	0.00112	0.001088	0.0013	0.001114	0.001161	0.00095	0.001093	0.000947	0.001045	0.001083
395	C7_02950C	DBF4	398	TCCTGTTTCAAGAAGTTAGA	TGG	0	-	54	no	-4	4	35	0	0	0	0	0	0	662	578	594	473	471	652	359	507	428	369	462	414	488	770	814	766	1267	753	970	0.001439	0.001344	0.001368	0.001306	0.001349	0.001399	0.001229	0.001356	0.001296	0.001348	0.001363	0.001401
396	C7_02950C	DBF4	399	TTAACTAATCACCATCAAAC	AGG	0	+	14	no	36	36	30	0	0	0	0	0	0	409	349	334	315	325	430	264	329	301	235	245	268	273	553	576	526	758	421	552	0.00089	0.000812	0.00077	0.000871	0.000931	0.000923	0.000905	0.000881	0.000912	0.00086	0.000724	0.000908
397	C7_02950C	DBF4	400	AACTGACTTTCTTCCGTATT	TGG	0	-	235	no	-185	185	35	0	0	0	0	0	0	384	289	310	215	239	364	217	271	255	187	267	202	261	415	487	411	621	385	466	0.000836	0.000673	0.000715	0.000595	0.000686	0.000782	0.000744	0.000726	0.000773	0.000685	0.000789	0.000685
398	C7_03000C	C7_03000C	401	TGTTGTGTGTGTGTGTCAAA	AGG	0	-	98	no	-69	69	40	0	0	0	0	0	0	1306	1235	1223	1044	1018	1245	824	1001	875	693	878	826	935	1427	1397	1534	2428	1517	1863	0.002837	0.002869	0.002815	0.002879	0.002912	0.002669	0.002816	0.002675	0.002646	0.002528	0.002588	0.002791
399	C7_03000C	C7_03000C	402	TTTCTTTCTATTTGCTTTCT	CGG	0	-	252	no	-223	223	25	0	0	0	0	0	0	36	31	28	21	32	30	26	23	40	16	21	14	26	45	51	40	72	35	42	8.03091e-05	7.42823e-05	6.66835e-05	6.06176e-05	9.42924e-05	6.64129e-05	9.21615e-05	6.40736e-05	0.000124	6.19141e-05	6.4779e-05	5.06242e-05
400	C7_03000C	C7_03000C	403	ATGTTGTTGAGATTTGGATT	TGG	0	+	216	no	-187	187	30	0	0	0	0	0	0	74	32	37	42	38	73	25	46	40	41	29	33	46	53	60	60	97	55	100	0.000163	7.66036e-05	8.73784e-05	0.000118	0.000111	0.000159	8.87481e-05	0.000125	0.000124	0.000153	8.83351e-05	0.000115
401	C7_03000C	C7_03000C	404	GTTGAGATTTGGATTTGGCG	TGG	0	+	211	no	-182	182	45	0	0	0	0	0	0	507	482	488	387	401	619	339	487	452	318	396	372	389	741	794	704	1132	708	793	0.001103	0.001121	0.001124	0.001069	0.001149	0.001328	0.001161	0.001303	0.001368	0.001162	0.001169	0.001259
402	C7_03120W	TIM54	405	TGATGAGTACAAAAGTAGTG	TGG	0	-	111	no	-80	80	35	0	0	0	0	0	0	1575	1073	1219	1020	902	1266	801	1018	898	732	813	700	841	1467	1395	1599	2136	1258	1687	0.003421	0.002493	0.002805	0.002813	0.00258	0.002714	0.002738	0.00272	0.002715	0.00267	0.002397	0.002366
403	C7_03120W	TIM54	406	CTTGTGTGTAGCTTATTCTG	GGG	0	-	23	no	8	8	40	0	0	0	0	0	0	65	50	53	50	49	65	32	47	39	38	39	23	36	74	76	73	94	71	95	0.000143	0.000118	0.000124	0.000141	0.000143	0.000141	0.000113	0.000128	0.000121	0.000142	0.000118	8.09987e-05
404	C7_03120W	TIM54	407	GCTTGTGTGTAGCTTATTCT	GGG	0	-	22	no	9	9	40	0	0	0	0	0	0	790	831	919	768	709	881	587	621	610	537	679	584	710	960	1091	1076	1788	895	1321	0.001717	0.001931	0.002115	0.002119	0.002029	0.00189	0.002007	0.001661	0.001846	0.001959	0.002002	0.001974
405	C7_03120W	TIM54	408	TGCTTGTGTGTAGCTTATTC	TGG	0	-	21	no	10	10	40	0	0	0	0	0	0	114	101	118	97	90	118	58	70	81	61	75	93	61	144	189	123	216	161	185	0.00025	0.000237	0.000274	0.00027	0.00026	0.000255	0.000201	0.00019	0.000248	0.000226	0.000224	0.000317
406	C7_04270C	UFE1	409	GAAAGGAGTTTATTGGTAGG	TGG	0	+	161	no	-143	143	40	0	0	0	0	0	0	465	394	448	366	345	417	270	416	366	270	343	300	338	621	698	773	919	585	746	0.001011	0.000917	0.001032	0.001011	0.000989	0.000896	0.000925	0.001113	0.001109	0.000987	0.001013	0.001016
407	C7_04270C	UFE1	410	CTTTCCTTCGGGGTTCTTGG	TGG	0	-	176	no	-158	158	55	0	0	0	0	0	0	425	412	395	323	296	395	287	404	353	274	280	276	312	549	566	623	780	478	642	0.000925	0.000959	0.000911	0.000893	0.000849	0.000848	0.000983	0.001081	0.001069	0.001002	0.000827	0.000935
408	C7_04270C	UFE1	411	GTTGGCGGTTGCGACTTCAA	TGG	0	-	113	no	-95	95	55	0	0	0	0	0	0	47	31	41	24	20	41	24	23	16	23	23	16	32	44	53	60	47	25	70	0.000104	7.42823e-05	9.65761e-05	6.88836e-05	6.00043e-05	8.99787e-05	8.53347e-05	6.40736e-05	5.13487e-05	8.74081e-05	7.0668e-05	5.73741e-05
409	C7_04270C	UFE1	412	GATTGCGTCTTTGTGGTTGG	CGG	0	-	98	no	-80	80	50	0	0	0	0	0	0	173	160	164	150	128	155	96	151	100	86	135	99	113	208	272	262	274	230	279	0.000378	0.000374	0.000379	0.000416	0.000369	0.000334	0.000331	0.000406	0.000305	0.000317	0.0004	0.000337
410	CR_00250W	ATP17	413	TGTCAAATGCTAATGTCTGT	AGG	0	+	179	no	-155	155	35	0	0	0	0	0	0	1574	1504	1526	1271	1268	1637	1041	1526	1273	1012	1170	1128	1203	2040	2243	2351	3068	1898	2452	0.003419	0.003494	0.003511	0.003505	0.003626	0.003509	0.003557	0.004077	0.003848	0.003689	0.003448	0.00381
411	CR_00250W	ATP17	414	TGTAGGAATTGAGCGCAGAT	TGG	0	+	162	no	-138	138	45	0	0	0	0	0	0	1262	1242	1192	963	920	1307	805	1014	994	774	1000	880	945	1533	1588	1651	2389	1469	1969	0.002741	0.002885	0.002743	0.002656	0.002632	0.002802	0.002751	0.00271	0.003005	0.002823	0.002947	0.002973
412	CR_00250W	ATP17	415	TTTCTGGTTGTTTGTTGTGT	GGG	0	-	85	no	-61	61	35	0	0	0	0	0	0	49	47	22	37	31	49	26	35	28	26	16	26	31	29	43	42	73	47	63	0.000109	0.000111	5.28869e-05	0.000105	9.14351e-05	0.000107	9.21615e-05	9.61105e-05	8.75948e-05	9.83341e-05	5.00565e-05	9.11236e-05
413	CR_00250W	ATP17	416	ATAGTTACTGTGTTGGTTGT	AGG	0	-	17	no	7	7	35	0	0	0	0	0	0	380	400	385	310	315	386	250	262	220	176	303	259	304	330	288	309	733	440	621	0.000827	0.000931	0.000888	0.000857	0.000903	0.000829	0.000857	0.000702	0.000668	0.000645	0.000895	0.000877
414	CR_00410W	RTT109	417	ATTAGCAAGTGTTGTTATTG	TGG	0	+	191	no	-169	169	30	0	0	0	0	0	0	1948	1758	1815	1542	1428	1885	1181	1599	1484	1186	1390	1274	1300	2574	2732	2928	3649	2415	2823	0.00423	0.004083	0.004176	0.004251	0.004083	0.00404	0.004035	0.004272	0.004485	0.004323	0.004096	0.004303
415	CR_00410W	RTT109	418	TTGTTGTTGGGAATCGATTG	AGG	0	+	114	no	-92	92	40	0	0	0	0	0	0	38	31	29	17	19	25	14	7	5	8	13	28	15	4		2	31	34	19	8.46501e-05	7.42823e-05	6.8983e-05	4.95962e-05	5.71469e-05	5.57011e-05	5.12008e-05	2.13579e-05	1.81231e-05	3.2778e-05	4.1223e-05	9.78734e-05
416	CR_00410W	RTT109	419	AATCGGTCCAAGTGAATTAC	TGG	0	+	18	no	4	4	40	0	0	0	0	0	0	1694	1514	1595	1388	1294	1730	1067	1425	1287	1077	1319	1108	1225	2366	2454	2431	3308	2216	2718	0.003679	0.003517	0.00367	0.003827	0.0037	0.003708	0.003645	0.003807	0.00389	0.003926	0.003887	0.003743
417	CR_00410W	RTT109	420	GACCGATTGGAAAGTATGAA	AGG	0	-	30	no	-8	8	40	0	0	0	0	0	0	429	266	263	207	206	310	213	115	101	85	218	137	183	75	90	92	458	249	329	0.000933	0.00062	0.000607	0.000573	0.000591	0.000666	0.00073	0.00031	0.000308	0.000313	0.000645	0.000466
418	CR_00480W	MRPL6	421	AGTGGCGAATGAAGTTTCGT	TGG	0	+	189	no	-162	162	45	0	0	0	0	0	0	3962	3636	3716	3103	2988	3858	2543	3218	2915	2372	2960	2452	2827	5305	5384	5669	7713	4764	5938	0.008602	0.008443	0.008547	0.008553	0.008541	0.008267	0.008684	0.008594	0.008808	0.008642	0.008719	0.008279
419	CR_00480W	MRPL6	422	AACATGTTCAAAACGAGTGG	TGG	0	-	136	no	-109	109	40	0	0	0	0	0	0	431	394	425	378	320	437	250	329	310	269	304	231	311	483	531	551	796	529	667	0.000938	0.000917	0.00098	0.001044	0.000917	0.000938	0.000857	0.000881	0.000939	0.000983	0.000898	0.000783
420	CR_00480W	MRPL6	423	TGTCTGTCCCCACGTTCAAG	TGG	0	-	281	no	-254	254	55	0	0	0	0	0	0	2795	2704	2791	2179	2231	2942	1764	2427	2297	1871	2111	1956	2194	4232	4445	4350	5721	3496	4652	0.006069	0.006279	0.00642	0.006007	0.006378	0.006305	0.006025	0.006482	0.006941	0.006818	0.006219	0.006605
421	CR_00480W	MRPL6	424	GAAGGTCTCTAAGATTAAAG	GGG	0	-	244	no	-217	217	35	0	0	0	0	0	0	1818	1650	1726	1530	1350	1884	1172	1606	1396	1142	1308	1174	1385	2537	2552	2678	3343	2197	2823	0.003948	0.003833	0.003971	0.004218	0.00386	0.004038	0.004004	0.00429	0.00422	0.004163	0.003854	0.003966
422	CR_00510C	ADE1	425	CTGTACAAAATGAGATAGCT	TGG	0	-	99	no	-47	47	35	0	0	0	0	2	2	41	30	53	40	34	42	26	37	40	36	29	30	49	51	68	58	105	47	46	9.11617e-05	7.1961e-05	0.000124	0.000113	0.0001	9.21211e-05	9.21615e-05	0.000101	0.000124	0.000135	8.83351e-05	0.000105
423	CR_00510C	ADE1	426	GGATTAGTATTATTTTTTTC	TGG	0	-	51	no	1	1	20	0	0	0	0	0	0	168	122	137	103	107	149	84	134	113	94	117	92	95	161	162	191	256	170	188	0.000367	0.000286	0.000317	0.000287	0.000309	0.000321	0.00029	0.00036	0.000344	0.000346	0.000347	0.000314
424	CR_00510C	ADE1	427	AGCAAAAAGAATAGTTGACT	CGG	0	-	30	no	22	22	30	0	0	0	0	0	0	698	590	613	558	488	666	410	585	541	389	543	442	497	843	778	828	1412	737	976	0.001517	0.001372	0.001412	0.00154	0.001397	0.001429	0.001403	0.001564	0.001637	0.00142	0.001602	0.001495
425	CR_00510C	ADE1	428	TGTAGGATTATGTGAGTATG	AGG	0	+	195	no	-143	143	35	0	0	0	0	1	1	807	780	681	593	605	864	514	653	604	526	534	491	532	1194	1089	1189	1513	870	1149	0.001754	0.001813	0.001568	0.001637	0.001732	0.001853	0.001758	0.001746	0.001827	0.001919	0.001575	0.00166
426	CR_00680W	BUD22	429	TAGGAAAACCGCGAAAGCAT	TGG	0	+	85	no	-66	66	45	0	0	0	0	0	0	1068	906	943	820	728	983	665	315	247	240	797	640	785	180	123	112	1869	1190	1512	0.00232	0.002105	0.002171	0.002262	0.002083	0.002108	0.002273	0.000844	0.000749	0.000878	0.00235	0.002163
427	CR_00680W	BUD22	430	AAATAGATGGAATCAAAAAG	TGG	0	-	47	no	-28	28	25	0	0	0	0	0	0	132	143	147	95	91	150	65	123	104	82	112	96	88	126	181	215	280	158	176	0.000289	0.000334	0.00034	0.000265	0.000263	0.000323	0.000225	0.000331	0.000317	0.000302	0.000333	0.000327
428	CR_00680W	BUD22	431	TTGCACCTTCTATTCTTTCT	AGG	0	+	259	no	-240	240	35	0	0	0	0	1	1	149	179	150	97	146	197	94	154	136	125	117	123	138	222	274	242	349	250	225	0.000326	0.000418	0.000347	0.00027	0.00042	0.000424	0.000324	0.000414	0.000414	0.000459	0.000347	0.000418
429	CR_00680W	BUD22	432	TCTAGGTAGAATATATTCAC	AGG	0	+	242	no	-223	223	30	0	0	0	0	0	0	99	86	97	77	75	93	61	112	77	69	61	78	94	143	131	134	204	82	190	0.000217	0.000202	0.000225	0.000215	0.000217	0.000201	0.000212	0.000302	0.000236	0.000255	0.000183	0.000267
430	CR_00890C	CR_00890C	433	GGAGAGGAAACAAACCAACC	AGG	0	+	112	no	-85	85	50	0	0	0	0	0	0	1260	1124	1117	957	995	1232	760	851	768	636	896	745	885	787	885	876	2249	1362	1847	0.002737	0.002611	0.002571	0.00264	0.002846	0.002642	0.002598	0.002275	0.002323	0.00232	0.002641	0.002518
431	CR_00890C	CR_00890C	434	AAATGAATTGTTCAGTTTCG	AGG	0	-	286	no	-259	259	30	0	0	0	0	0	0																				2.17052e-06	2.32132e-06	2.29943e-06	2.75534e-06	2.85735e-06	2.14235e-06	3.41339e-06	2.66974e-06	3.02051e-06	3.64201e-06	2.9445e-06	3.37495e-06
432	CR_00890C	CR_00890C	435	CTATAGCCACTACTTACTAG	TGG	0	+	235	no	-208	208	40	0	0	0	0	0	0	40	18	21	36	19	21	11	23	17	18	35	13	19	39	34	38	65	27	41	8.89911e-05	4.41051e-05	5.05875e-05	0.000102	5.71469e-05	4.71317e-05	4.09607e-05	6.40736e-05	5.43692e-05	6.91981e-05	0.000106	4.72492e-05
433	CR_00890C	CR_00890C	436	CCTTTCCCACTAGTAAGTAG	TGG	0	-	226	no	-199	199	45	0	0	0	0	1	1	139	138	135	98	107	148	87	137	77	84	103	97	103	177	235	214	269	181	176	0.000304	0.000323	0.000313	0.000273	0.000309	0.000319	0.0003	0.000368	0.000236	0.00031	0.000306	0.000331
434	CR_01300W	CR_01300W	437	CCCATTGTGCACGACTAAAT	AGG	0	+	256	no	-207	207	45	0	0	0	0	0	0	182	155	141	133	131	196	118	146	118	99	114	123	140	216	194	246	318	240	274	0.000397	0.000362	0.000327	0.000369	0.000377	0.000422	0.000406	0.000392	0.000359	0.000364	0.000339	0.000418
435	CR_01300W	CR_01300W	438	GCACGACTAAATAGGTTACT	TGG	0	+	248	no	-199	199	40	0	0	0	0	2	2	583	536	582	478	462	614	428	538	441	382	460	408	471	802	892	866	1215	779	948	0.001268	0.001247	0.001341	0.00132	0.001323	0.001318	0.001464	0.001439	0.001335	0.001395	0.001357	0.00138
436	CR_01300W	CR_01300W	439	CTATTTAGTCGTGCACAATG	GGG	0	-	254	no	-205	205	40	0	0	0	0	3	3	35	33	46	22	29	32	24	37	37	27	42	32	27	49	96	65	85	43	67	7.81386e-05	7.89249e-05	0.000108	6.33729e-05	8.57204e-05	7.06976e-05	8.53347e-05	0.000101	0.000115	0.000102	0.000127	0.000111
437	CR_01300W	CR_01300W	440	CCTATTTAGTCGTGCACAAT	GGG	0	-	253	no	-204	204	40	0	0	0	0	0	0	1630	1535	1542	1293	1215	1679	1080	1387	1344	1077	1264	1081	1338	2464	2367	2484	3305	2003	2546	0.00354	0.003566	0.003548	0.003565	0.003475	0.003599	0.00369	0.003706	0.004063	0.003926	0.003725	0.003652
438	CR_01370C	CR_01370C	441	ACACTTGATGGAAATGAATG	TGG	0	+	159	no	-111	111	35	0	0	0	0	0	0	420	369	459	352	325	471	268	329	267	225	339	262	312	420	378	526	789	526	648	0.000914	0.000859	0.001058	0.000973	0.000931	0.001011	0.000918	0.000881	0.000809	0.000823	0.001001	0.000888
439	CR_01370C	CR_01370C	442	TGTGGTCGTGCAAAGCAACC	AGG	0	+	141	no	-93	93	55	0	0	0	0	0	0	851	879	797	726	705	859	568	692	658	562	718	638	660	1049	1027	1145	1770	1049	1284	0.001849	0.002043	0.001835	0.002003	0.002017	0.001842	0.001942	0.00185	0.001991	0.00205	0.002117	0.002157
440	CR_01370C	CR_01370C	443	GGTCTTGGATCGTAAGTTTG	AGG	0	+	120	no	-72	72	45	0	0	0	0	0	0	8179	7292	7399	6099	6092	7926	5143	5749	5186	4203	5714	5018	5710	7971	8357	8491	15215	9357	12000	0.0177548	0.0169294	0.0170158	0.0168076	0.01741	0.0169824	0.0175585	0.015351	0.015667	0.015311	0.0168278	0.0169389
441	CR_01370C	CR_01370C	444	TAAGTATCGATTACTCTCTT	GGG	0	-	49	no	-1	1	30	0	0	0	0	0	0	193	213	162	184	167	231	143	110	91	77	151	119	157	52	47	67	301	165	263	0.000421	0.000497	0.000375	0.00051	0.00048	0.000497	0.000492	0.000296	0.000278	0.000284	0.000448	0.000405
442	CR_01620C	MET6	445	AACTGTGTGTGTGTGCGTGT	GGG	0	-	251	no	-195	195	50	0	0	0	0	0	0	216	154	175	153	156	224	135	181	128	133	148	135	174	296	322	295	408	225	319	0.000471	0.00036	0.000405	0.000424	0.000449	0.000482	0.000464	0.000486	0.00039	0.000488	0.000439	0.000459
443	CR_01620C	MET6	446	AAACTGTGTGTGTGTGCGTG	TGG	0	-	250	no	-194	194	50	0	0	0	0	0	0	75	57	59	60	54	46	40	59	35	42	37	51	51	93	92	115	110	71	102	0.000165	0.000135	0.000138	0.000168	0.000157	0.000101	0.00014	0.00016	0.000109	0.000157	0.000112	0.000175
444	CR_01620C	MET6	447	TCGCCGCCCACTCCTCGTTT	AGG	0	+	220	no	-164	164	65	0	0	0	0	0	0	1480	1282	1338	1061	1068	1408	870	1006	962	834	1029	871	1020	1783	1816	1912	2701	1599	2209	0.003215	0.002978	0.003079	0.002926	0.003055	0.003019	0.002973	0.002688	0.002909	0.003041	0.003033	0.002943
445	CR_01620C	MET6	448	ATTCCTAAACGAGGAGTGGG	CGG	0	-	214	no	-158	158	50	0	0	0	0	0	0	703	513	562	464	488	650	431	116	128	132	462	425	431	58	44	61	1271	811	973	0.001528	0.001193	0.001295	0.001281	0.001397	0.001395	0.001475	0.000312	0.00039	0.000484	0.001363	0.001438
446	CR_02090C	CET1	449	TGTCAGAACTAGCTTGTTGA	TGG	0	+	45	no	-13	13	40	0	0	0	0	0	0	3016	2901	2848	2469	2172	3109	1872	2398	2144	1859	2192	1940	2340	3749	3815	4120	5790	3522	4475	0.006548	0.006736	0.006551	0.006806	0.006209	0.006663	0.006393	0.006405	0.006479	0.006774	0.006457	0.006551
447	CR_02090C	CET1	450	GTCAGAACTAGCTTGTTGAT	GGG	0	+	44	no	-12	12	40	0	0	0	0	0	0	1331	1290	1268	1022	1025	1380	887	1174	970	861	933	892	1009	1717	1685	1776	2430	1526	2144	0.002891	0.002997	0.002918	0.002819	0.002932	0.002959	0.003031	0.003137	0.002933	0.003139	0.00275	0.003014
448	CR_02090C	CET1	451	GGCAACCGTTGACTTGTTTA	TGG	0	+	23	no	9	9	45	0	0	0	0	0	0	3674	3240	3212	2607	2628	3601	2230	2937	2605	2219	2516	2223	2509	4074	4446	4384	6486	4023	5122	0.007977	0.007523	0.007388	0.007186	0.007512	0.007717	0.007615	0.007844	0.007871	0.008085	0.007411	0.007506
449	CR_02090C	CET1	452	TATGGCCATAAACAAGTCAA	CGG	0	-	15	no	17	17	35	0	0	0	0	0	0	2665	2401	2484	2023	2015	2778	1659	2085	1944	1504	1958	1761	1991	3355	3665	3854	4851	3176	4161	0.005787	0.005576	0.005714	0.005577	0.00576	0.005954	0.005666	0.005569	0.005875	0.005481	0.005768	0.005947
450	CR_02540W	CHO2	453	TGTTGTAAGAATATATAATT	AGG	0	-	135	no	422	422	15	0	0	0	0	0	0	2555	2488	2621	2243	2184	2815	1724	2477	1912	1653	2049	1870	2091	3375	3688	3898	5056	3144	4086	0.005548	0.005778	0.006029	0.006183	0.006243	0.006033	0.005888	0.006616	0.005778	0.006024	0.006036	0.006315
451	CR_02540W	CHO2	454	TAGATTAATATAATTTAGTT	TGG	0	+	107	no	450	450	10	0	0	0	0	0	0	267	297	340	277	263	349	198	297	255	205	238	234	231	440	428	420	583	357	516	0.000582	0.000692	0.000784	0.000766	0.000754	0.00075	0.000679	0.000796	0.000773	0.00075	0.000704	0.000793
452	CR_02540W	CHO2	455	TGCAATATGTAATATGATCT	GGG	0	-	255	no	302	302	25	0	0	0	0	0	0	111	122	100	98	93	141	67	94	94	75	71	77	85	118	164	191	214	161	182	0.000243	0.000286	0.000232	0.000273	0.000269	0.000304	0.000232	0.000254	0.000287	0.000277	0.000212	0.000263
453	CR_02540W	CHO2	456	ATGCAATATGTAATATGATC	TGG	0	-	254	no	303	303	25	0	0	0	0	0	0																				2.17052e-06	2.32132e-06	2.29943e-06	2.75534e-06	2.85735e-06	2.14235e-06	3.41339e-06	2.66974e-06	3.02051e-06	3.64201e-06	2.9445e-06	3.37495e-06
454	CR_02580W	PAN6	457	TCCGCGTAAGATTCTTCTAC	AGG	0	+	96	no	-65	65	45	0	0	0	0	0	0	236	206	238	188	187	287	164	229	184	144	203	168	170	310	331	342	413	308	329	0.000514	0.000481	0.00055	0.000521	0.000537	0.000617	0.000563	0.000614	0.000559	0.000528	0.000601	0.00057
455	CR_02580W	PAN6	458	CCGCGTAAGATTCTTCTACA	GGG	0	+	95	no	-64	64	45	0	0	0	0	0	0	64	37	46	40	42	50	35	23	22	17	54	36	64	24	54	27	87	34	58	0.000141	8.82102e-05	0.000108	0.000113	0.000123	0.000109	0.000123	6.40736e-05	6.94717e-05	6.55561e-05	0.000162	0.000125
456	CR_02580W	PAN6	459	CCCTGTAGAAGAATCTTACG	CGG	0	-	92	no	-61	61	45	0	0	0	0	0	0	139	147	143	124	127	173	104	109	91	91	103	91	89	177	234	243	382	163	184	0.000304	0.000344	0.000331	0.000344	0.000366	0.000373	0.000358	0.000294	0.000278	0.000335	0.000306	0.00031
457	CR_02580W	PAN6	460	GTGGTGGAGTGATTCCTTAC	AGG	0	-	41	no	-10	10	50	1	0	1	1	0	0	4	1	8		5	4	3			1	3		2	2	3		6	3	6	1.08526e-05	4.64264e-06	2.06949e-05	2.75534e-06	1.71441e-05	1.07118e-05	1.36536e-05	2.66974e-06	3.02051e-06	7.28401e-06	1.1778e-05	3.37495e-06
458	CR_02990C	RIB1	461	AATTGTTGAATAATTTATAA	TGG	0	-	208	no	-27	27	10	1	0	1	1	0	0	111	111	106	94	74	123	71	114	91	79	87	79	69	158	170	169	210	142	172	0.000243	0.00026	0.000246	0.000262	0.000214	0.000266	0.000246	0.000307	0.000278	0.000291	0.000259	0.00027
459	CR_02990C	RIB1	462	CATTGATTTGTCCTTGTGTT	TGG	0	+	177	no	4	4	35	1	0	1	1	0	0	32	28	12	23	19	19	13	14	18	14	20	15	16	28	44	49	27	31	28	7.1627e-05	6.73183e-05	2.98926e-05	6.61283e-05	5.71469e-05	4.2847e-05	4.77874e-05	4.0046e-05	5.73897e-05	5.46301e-05	6.18345e-05	5.39991e-05
460	CR_02990C	RIB1	463	CAAACACAAGGACAAATCAA	TGG	0	-	175	no	6	6	35	0	0	0	0	0	0	200	153	146	122	134	162	129	102	120	108	128	104	129	174	208	188	323	206	259	0.000436	0.000357	0.000338	0.000339	0.000386	0.000349	0.000444	0.000275	0.000365	0.000397	0.00038	0.000354
461	CR_02990C	RIB1	464	TAAATTTATTAAATGGGTTG	TGG	0	-	25	no	156	156	20	0	0	0	0	0	0	437	361	352	281	270	354	203	373	296	218	255	251	295	447	485	498	663	464	573	0.000951	0.00084	0.000812	0.000777	0.000774	0.000761	0.000696	0.000998	0.000897	0.000798	0.000754	0.00085
462	CR_03430W	CR_03430W	465	TCTCAACATGTAGTCGTGTG	TGG	0	+	129	no	-87	87	45	0	0	0	0	0	0	699	570	629	532	496	694	405	545	464	380	508	431	521	751	685	795	1332	716	1035	0.001519	0.001325	0.001449	0.001469	0.00142	0.001489	0.001386	0.001458	0.001405	0.001388	0.001499	0.001458
463	CR_03430W	CR_03430W	466	GTCGTGTGTGGTTCAACATT	AGG	0	+	117	no	-75	75	45	0	0	0	0	0	0	506	451	478	435	362	505	297	440	374	297	360	329	383	613	618	660	954	570	732	0.0011	0.001049	0.001101	0.001201	0.001037	0.001084	0.001017	0.001177	0.001133	0.001085	0.001063	0.001114
464	CR_03430W	CR_03430W	467	AAACTTGACTTCTTACTTCT	AGG	0	+	16	no	26	26	30	1	0	1	1	1	0	126	149	162	112	101	160	102	137	119	95	100	98	103	171	174	194	270	154	206	0.000276	0.000348	0.000375	0.000311	0.000291	0.000345	0.000352	0.000368	0.000362	0.00035	0.000297	0.000334
465	CR_03430W	CR_03430W	468	GAAGTAAGAAGTCAAGTTTA	TGG	0	-	17	no	25	25	30	0	0	0	0	0	0	633	691	671	529	519	673	456	585	524	459	532	445	537	916	922	1012	1294	888	1093	0.001376	0.001606	0.001545	0.00146	0.001486	0.001444	0.00156	0.001564	0.001586	0.001675	0.001569	0.001505
466	CR_03530W	CR_03530W	469	TCAGTGAGTTGCTCACTGAT	TGG	0	-	175	no	-95	95	45	0	0	0	0	0	0		2		1	1				3		1							1	2	2.17052e-06	6.96397e-06	2.29943e-06	5.51069e-06	5.71469e-06	2.14235e-06	3.41339e-06	2.66974e-06	1.2082e-05	3.64201e-06	5.889e-06	3.37495e-06
467	CR_03530W	CR_03530W	470	GAACTGTACCAAGTGAGAGG	GGG	0	+	155	no	-75	75	50	1	0	1	1	1	0	1647	1328	1435	1038	1181	1661	1058	992	991	748	1195	1059	1197	1326	993	1152	3128	2046	2408	0.003577	0.003085	0.003302	0.002863	0.003377	0.003561	0.003615	0.002651	0.002996	0.002728	0.003522	0.003577
468	CR_03530W	CR_03530W	471	TTCTTTGACCCCCTCTCACT	TGG	0	-	144	no	-64	64	50	0	0	0	0	0	0	1133	1157	1114	865	878	1215	740	949	886	691	883	720	795	1421	1604	1469	2141	1375	1716	0.002461	0.002688	0.002564	0.002386	0.002512	0.002605	0.002529	0.002536	0.002679	0.00252	0.002603	0.002433
469	CR_03530W	CR_03530W	472	ACACTACCCCAATATTTGAT	TGG	0	+	261	no	-181	181	35	0	0	0	0	0	0	276	232	273	207	181	230	185	213	168	165	183	166	191	393	385	387	525	335	348	0.000601	0.000541	0.00063	0.000573	0.00052	0.000495	0.000635	0.000571	0.00051	0.000605	0.000542	0.000564
470	CR_03930C	CR_03930C	473	AAAAAATGCGTTATTAAGAC	TGG	0	+	179	no	-139	139	25	0	0	0	0	0	0	67	70	91	63	71	70	59	91	72	41	54	55	70	83	118	85	133	100	134	0.000148	0.000165	0.000212	0.000176	0.000206	0.000152	0.000205	0.000246	0.00022	0.000153	0.000162	0.000189
471	CR_03930C	CR_03930C	474	TCTATTATATCTTTACGAGC	AGG	0	+	274	no	-234	234	30	0	0	0	0	0	0	137	130	151	112	104	162	87	135	122	98	109	116	88	210	195	223	286	180	230	0.0003	0.000304	0.00035	0.000311	0.0003	0.000349	0.0003	0.000363	0.000372	0.000361	0.000324	0.000395
472	CR_03930C	CR_03930C	475	TTTACGAGCAGGAAAAGACT	AGG	0	+	263	no	-223	223	40	0	0	0	0	0	0	411	427	403	335	346	439	298	365	317	310	340	293	291	561	569	563	817	494	647	0.000894	0.000994	0.000929	0.000926	0.000991	0.000943	0.001021	0.000977	0.000961	0.001133	0.001004	0.000992
473	CR_03930C	CR_03930C	476	ATAATTAATGTATACAATTA	AGG	0	+	239	no	-199	199	10	1	0	1	1	1	0																				2.17052e-06	2.32132e-06	2.29943e-06	2.75534e-06	2.85735e-06	2.14235e-06	3.41339e-06	2.66974e-06	3.02051e-06	3.64201e-06	2.9445e-06	3.37495e-06
474	CR_03950W	CR_03950W	477	CAACCACATACAATATATTG	GGG	0	+	152	no	-136	136	30	0	0	0	0	0	0	24	21	42	25	33	25	12	27	19	16	13	18	28	26	31	56	50	17	47	5.42629e-05	5.10691e-05	9.88756e-05	7.1639e-05	9.71498e-05	5.57011e-05	4.43741e-05	7.47526e-05	6.04102e-05	6.19141e-05	4.1223e-05	6.4124e-05
475	CR_03950W	CR_03950W	478	TTACCCCAATATATTGTATG	TGG	0	-	146	no	-130	130	30	0	0	0	0	0	0	582	526	585	429	464	573	330	474	395	293	421	386	457	748	883	752	1106	749	824	0.001265	0.001223	0.001347	0.001185	0.001329	0.00123	0.00113	0.001268	0.001196	0.001071	0.001243	0.001306
476	CR_03950W	CR_03950W	479	CTTATTGACCTTCTCTTATC	AGG	0	-	240	no	-224	224	35	0	0	0	0	0	0	128	99	97	79	97	110	69	90	79	53	71	72	73	209	132	144	176	99	141	0.00028	0.000232	0.000225	0.00022	0.00028	0.000238	0.000239	0.000243	0.000242	0.000197	0.000212	0.000246
477	CR_03950W	CR_03950W	480	GTAGTATGGTTCTTTCTGTT	AGG	0	+	197	yes	-181	181	35	0	0	0	0	0	0	137	135	151	103	117	172	83	112	133	87	142	78	105	233	221	214	254	170	238	0.0003	0.000316	0.00035	0.000287	0.000337	0.000371	0.000287	0.000302	0.000405	0.00032	0.000421	0.000267
478	CR_04140W	CR_04140W	481	CGGTATTACTTTCACTGGGG	AGG	0	-	206	no	-155	155	50	0	0	0	0	0	0	377	304	280	284	271	370	229	122	120	87	261	216	254	19	32	28	555	402	529	0.00082	0.000708	0.000646	0.000785	0.000777	0.000795	0.000785	0.000328	0.000365	0.00032	0.000771	0.000732
479	CR_04140W	CR_04140W	482	ATTCGGTATTACTTTCACTG	GGG	0	-	203	no	-152	152	35	0	0	0	0	0	0	62	61	63	56	34	55	46	37	34	30	50	29	36	42	60	64	83	67	111	0.000137	0.000144	0.000147	0.000157	0.0001	0.00012	0.00016	0.000101	0.000106	0.000113	0.00015	0.000101
480	CR_04140W	CR_04140W	483	ATACAATTTACAATTGATTG	AGG	0	+	118	no	-67	67	20	3	0	3	3	0	0	30	32	41	29	20	41	15	21	18	15	33	25	28	28	25	19	56	41	60	6.7286e-05	7.66036e-05	9.65761e-05	8.26603e-05	6.00043e-05	8.99787e-05	5.46142e-05	5.87342e-05	5.73897e-05	5.82721e-05	0.0001	8.77486e-05
481	CR_04140W	CR_04140W	484	GTTGTGTTTGACCTATAGGT	TGG	0	-	38	yes	13	13	40	0	0	0	0	0	0	546	467	485	357	358	473	291	365	309	263	326	281	360	479	454	529	952	637	711	0.001187	0.001086	0.001118	0.000986	0.001026	0.001015	0.000997	0.000977	0.000936	0.000961	0.000963	0.000952
482	CR_04520W	MIM1	485	ATGTAGTTTTGAAGTGATAG	TGG	0	+	176	no	-135	135	30	0	0	0	0	0	0	77	63	84	72	43	53	57	47	75	55	43	46	72	103	80	146	194	88	116	0.000169	0.000149	0.000195	0.000201	0.000126	0.000116	0.000198	0.000128	0.00023	0.000204	0.00013	0.000159
483	CR_04520W	MIM1	486	ACTGTACACGACTTCTTTGA	TGG	0	-	136	no	-95	95	40	0	0	0	0	0	0	7903	7369	7472	6187	5856	8175	5189	7432	6650	5442	5856	5121	5865	12988	13961	14508	15256	9497	12091	0.0171558	0.0171081	0.0171837	0.01705	0.016735	0.0175159	0.0177155	0.0198441	0.0200894	0.019823	0.0172459	0.017286
484	CR_04520W	MIM1	487	TGTATAAGTAAATAAAAATC	AGG	0	-	65	no	-24	24	15	1	0	1	1	1	0	16	15	19	16	14	10	5	11	7	7	8	9	9	19	37	13	22	16	17	3.68988e-05	3.71412e-05	4.59886e-05	4.68409e-05	4.28602e-05	2.35659e-05	2.04803e-05	3.20368e-05	2.41641e-05	2.9136e-05	2.65005e-05	3.37495e-05
485	CR_04520W	MIM1	488	AGAATAAAGATCAAGAATTT	AGG	0	+	214	no	-173	173	20	3	0	3	3	3	0	1974	1957	1848	1597	1566	2001	1208	1655	1419	1238	1510	1334	1469	2555	2606	2833	3946	2243	2761	0.004287	0.004545	0.004252	0.004403	0.004477	0.004289	0.004127	0.004421	0.004289	0.004512	0.004449	0.004506
486	CR_05100W	BIR1	489	TTTCAGATGTTCCCTGTTAT	CGG	0	+	190	no	-135	135	35	0	0	0	0	0	0	78	108	105	73	86	116	74	93	95	62	91	68	84	143	140	196	246	144	193	0.000171	0.000253	0.000244	0.000204	0.000249	0.000251	0.000256	0.000251	0.00029	0.000229	0.000271	0.000233
487	CR_05100W	BIR1	490	CGTGCAACGCCAATACATTA	CGG	0	+	162	no	-107	107	45	0	0	0	0	0	0	560	618	483	451	444	544	429	489	395	345	457	366	482	732	657	764	930	713	910	0.001218	0.001437	0.001113	0.001245	0.001272	0.001168	0.001468	0.001308	0.001196	0.00126	0.001349	0.001239
488	CR_05100W	BIR1	491	GTGCAACGCCAATACATTAC	GGG	0	+	161	no	-106	106	45	0	0	0	0	0	0	122	131	111	113	127	132	74	108	81	98	109	86	95	99	129	114	237	152	184	0.000267	0.000306	0.000258	0.000314	0.000366	0.000285	0.000256	0.000291	0.000248	0.000361	0.000324	0.000294
489	CR_05100W	BIR1	492	TTGCACGAAGTACCGATAAC	AGG	0	-	175	no	-120	120	45	0	0	0	0	0	0	106	133	126	121	121	188	93	122	110	76	90	108	89	213	174	207	263	151	240	0.000232	0.000311	0.000292	0.000336	0.000349	0.000405	0.000321	0.000328	0.000335	0.00028	0.000268	0.000368
490	CR_06640C	CR_06640C	493	ACTAAAATATTGTTGTGGTG	TGG	0	-	193	no	30	30	30	0	0	0	0	0	0	253	274	216	206	215	279	150	202	163	164	182	176	187	296	327	329	525	337	411	0.000551	0.000638	0.000499	0.00057	0.000617	0.0006	0.000515	0.000542	0.000495	0.000601	0.000539	0.000597
491	CR_06640C	CR_06640C	494	AGAATACTAAAATATTGTTG	TGG	0	-	188	no	35	35	20	0	0	0	0	0	0	1564	1490	1497	1212	1190	1725	1057	1399	1117	982	1339	1022	1280	1976	2137	2236	2956	1805	2363	0.003397	0.003461	0.003445	0.003342	0.003403	0.003698	0.003611	0.003738	0.003377	0.00358	0.003946	0.003453
492	CR_06640C	CR_06640C	495	TACTTCAACAGTATATACAC	TGG	0	+	124	no	99	99	30	0	0	0	0	0	0	252	209	258	224	239	269	173	251	204	192	226	193	166	438	363	366	524	309	435	0.000549	0.000487	0.000596	0.00062	0.000686	0.000578	0.000594	0.000673	0.000619	0.000703	0.000668	0.000655
493	CR_06640C	CR_06640C	496	GTTCTTCTTCTTCTTCTTCT	TGG	0	-	254	yes	-31	31	35	0	0	0	0	0	0	626	655	646	545	564	722	513	623	528	387	538	421	487	835	869	950	1297	731	959	0.001361	0.001523	0.001488	0.001504	0.001614	0.001549	0.001754	0.001666	0.001598	0.001413	0.001587	0.001424
494	CR_07390C	MRPL8	497	GCTATAACGTTACTAGTAGT	AGG	0	-	141	no	-114	114	35	0	0	0	0	0	0	1905	1740	1697	1469	1425	1876	1149	1293	1097	989	1380	1220	1414	1623	1699	2004	3570	2139	2752	0.004137	0.004041	0.003904	0.00405	0.004075	0.004021	0.003925	0.003455	0.003317	0.003606	0.004066	0.004121
495	CR_07390C	MRPL8	498	TGCGCACAATTTCCTGCACA	TGG	0	+	119	no	-92	92	50	0	0	0	0	0	0	276	258	227	244	192	309	186	238	220	201	229	185	164	398	399	445	571	342	460	0.000601	0.000601	0.000524	0.000675	0.000551	0.000664	0.000638	0.000638	0.000668	0.000736	0.000677	0.000628
496	CR_07390C	MRPL8	499	GAGTATAGTGATCCATGTGC	AGG	0	-	104	no	-77	77	45	1	0	1	0	1	0	9	7	8	9	8	2	7	8	3	2	9	9	12	6	8	20	22	15	7	2.17052e-05	1.85706e-05	2.06949e-05	2.75534e-05	2.57161e-05	6.42705e-06	2.73071e-05	2.40276e-05	1.2082e-05	1.0926e-05	2.9445e-05	3.37495e-05
497	CR_07390C	MRPL8	500	TAGGGTTGATTAAAAGAGAA	AGG	0	-	21	no	6	6	30	2	0	0	0	2	0	2240	2034	2148	1719	1749	2252	1441	1671	1318	1162	1638	1416	1760	2163	2286	2199	4059	2579	3334	0.004864	0.004724	0.004941	0.004739	0.005	0.004827	0.004922	0.004464	0.003984	0.004236	0.004826	0.004782
498	CR_07710W	ARO2	501	GCCTCGAGTGCTAATGCCAA	AGG	0	+	273	no			55	0	0	0	0	0	0	2468	2304	2360	1999	1910	2518	1579	2112	1988	1529	1885	1613	1901	3469	3617	3943	4862	2954	4000	0.005359	0.005351	0.005429	0.005511	0.00546	0.005397	0.005393	0.005641	0.006008	0.005572	0.005553	0.005447
499	CR_07710W	ARO2	502	ACCTTTGGCATTAGCACTCG	AGG	0	-	269	no			50	0	0	0	0	0	0	286	242	302	230	207	319	176	222	215	191	202	183	208	406	416	391	605	303	423	0.000623	0.000564	0.000697	0.000636	0.000594	0.000686	0.000604	0.000595	0.000652	0.000699	0.000598	0.000621
500	CR_07710W	ARO2	503	ATATTTGAGTGAATTGGCTA	TGG	0	+	232	no			30	0	0	0	0	0	0	22	10	25	25	15	17	16	15	17	17	15	9	23	27	26	27	46	16	27	4.99219e-05	2.55345e-05	5.97852e-05	7.1639e-05	4.57176e-05	3.85623e-05	5.80276e-05	4.27158e-05	5.43692e-05	6.55561e-05	4.7112e-05	3.37495e-05
501	CR_07710W	ARO2	504	ATAGCCAATTCACTCAAATA	TGG	0	-	231	no			30	0	0	0	0	0	0	411	440	404	323	301	416	218	405	331	223	356	227	298	549	511	633	745	546	637	0.000894	0.001024	0.000931	0.000893	0.000863	0.000893	0.000748	0.001084	0.001003	0.000816	0.001051	0.000769
502	CR_09320C	PHO88	505	AGCGAGTAGTAGTAGTTTGT	TGG	0	+	257	no	-183	183	40	0	0	0	0	0	0	1092	1036	999	848	797	1026	719	976	847	703	775	700	795	1509	1544	1572	2262	1271	1649	0.002372	0.002407	0.002299	0.002339	0.00228	0.0022	0.002458	0.002608	0.002561	0.002564	0.002285	0.002366
503	CR_09320C	PHO88	506	GAGTAGTAGTAGTTTGTTGG	CGG	0	+	254	no	-180	180	40	1	0	0	0	1	0	147	125	127	144	113	158	97	120	118	93	115	95	126	216	216	210	296	152	214	0.000321	0.000292	0.000294	0.0004	0.000326	0.000341	0.000335	0.000323	0.000359	0.000342	0.000342	0.000324
504	CR_09320C	PHO88	507	GTAGTAGTAGTTTGTTGGCG	GGG	0	+	252	no	-178	178	45	1	0	0	0	1	0	142	133	122	117	107	132	75	100	90	84	95	79	84	207	189	182	254	138	213	0.00031	0.000311	0.000283	0.000325	0.000309	0.000285	0.000259	0.00027	0.000275	0.00031	0.000283	0.00027
505	CR_09320C	PHO88	508	TAGTAGTAGTTTGTTGGCGG	GGG	0	+	251	no	-177	177	45	0	0	0	0	0	0	144	141	131	126	135	140	105	120	120	89	112	99	120	204	195	204	326	150	255	0.000315	0.00033	0.000304	0.00035	0.000389	0.000302	0.000362	0.000323	0.000365	0.000328	0.000333	0.000337
506	CR_09760W	MED21	509	AATGTTGGGTTAGTTGGTCT	TGG	0	-	18	no	17	17	40	0	0	0	0	0	0	439	385	448	347	301	501	294	338	290	248	293	294	360	600	623	663	875	452	655	0.000955	0.000896	0.001032	0.000959	0.000863	0.001075	0.001007	0.000905	0.000879	0.000907	0.000866	0.000996
507	CR_09760W	MED21	510	CGAGGGCGCGGGGGGAGGGG	TGG	0	-	221	no	-186	186	90	0	0	0	0	0	0	363	279	287	224	223	330	185	272	246	178	213	203	252	464	507	493	772	397	592	0.00079	0.00065	0.000662	0.00062	0.00064	0.000709	0.000635	0.000729	0.000746	0.000652	0.00063	0.000688
508	CR_09760W	MED21	511	ATACGAGGGCGCGGGGGGAG	GGG	0	-	218	no	-183	183	75	0	0	0	0	0	0	991	925	999	757	797	981	674	802	825	743	714	620	717	1513	1682	1594	2016	1276	1622	0.002153	0.00215	0.002299	0.002089	0.00228	0.002104	0.002304	0.002144	0.002495	0.00271	0.002105	0.002096
509	CR_09760W	MED21	512	TATGTAATACGAGGGCGCGG	GGG	0	-	212	no	-177	177	55	0	0	0	0	0	0	1466	1321	1335	1062	1063	1408	869	1299	1160	966	973	901	1042	1915	2068	2241	2906	1789	2316	0.003184	0.003069	0.003072	0.002929	0.00304	0.003019	0.00297	0.003471	0.003507	0.003522	0.002868	0.003044
510	CR_10010C	MSS51	513	TATCTAATATCTAATAAACA	CGG	0	-	141	no	11	11	15	0	0	0	0	0	0	165	140	149	161	144	174	115	154	104	89	123	121	126	202	238	227	418	184	249	0.00036	0.000327	0.000345	0.000446	0.000414	0.000375	0.000396	0.000414	0.000317	0.000328	0.000365	0.000412
511	CR_10010C	MSS51	514	TAAAATTCAAATCCCATTGT	CGG	0	-	282	no	-130	130	25	0	0	0	0	0	0	527	492	521	440	376	560	332	466	376	329	361	316	403	702	713	779	1006	600	858	0.001146	0.001144	0.0012	0.001215	0.001077	0.001202	0.001137	0.001247	0.001139	0.001202	0.001066	0.00107
512	CR_10010C	MSS51	515	ATTAAAATAGGCTGATGAGT	AGG	0	-	24	no	128	128	30	0	0	0	0	0	0	959	882	935	807	702	1010	613	872	804	577	722	637	744	1253	1391	1304	1846	1219	1488	0.002084	0.00205	0.002152	0.002226	0.002009	0.002166	0.002096	0.002331	0.002432	0.002105	0.002129	0.002153
513	CR_10010C	MSS51	516	CCAAAAGGATAAATTAAAAT	AGG	0	-	12	no	140	140	20	0	0	0	0	0	0	928	957	929	726	770	934	577	852	706	629	750	640	671	1191	1312	1445	1799	1061	1351	0.002016	0.002224	0.002138	0.002003	0.002203	0.002003	0.001973	0.002277	0.002136	0.002294	0.002211	0.002163
514	CR_10650W	LTV1	517	AATGCAAGCACGTATCCTAA	AGG	0	-	241	no	-224	224	40	0	0	0	0	0	0	1434	1402	1361	1191	1084	1435	938	1269	1147	968	1088	942	1149	1968	2073	2172	2813	1736	2244	0.003115	0.003257	0.003132	0.003284	0.0031	0.003076	0.003205	0.003391	0.003468	0.003529	0.003207	0.003183
515	CR_10650W	LTV1	518	AAATTTGGTATGGAGATGAG	TGG	0	+	220	no	-203	203	35	0	0	0	0	0	0	14	26	21	12	12	22	15	18	9	1	16	17	8	11	8	10	63	25	62	3.25577e-05	6.26757e-05	5.05875e-05	3.58195e-05	3.71455e-05	4.92741e-05	5.46142e-05	5.0725e-05	3.02051e-05	7.28401e-06	5.00565e-05	6.0749e-05
516	CR_10650W	LTV1	519	GTATGGAGATGAGTGGGTTA	TGG	0	+	213	no	-196	196	45	0	0	0	0	0	0	412	375	399	337	293	397	216	315	316	279	308	288	279	487	569	654	805	539	679	0.000896	0.000873	0.00092	0.000931	0.00084	0.000853	0.000741	0.000844	0.000958	0.00102	0.00091	0.000975
517	CR_10650W	LTV1	520	TTATGGATTGGATTGACTAT	TGG	0	+	196	no	-179	179	30	0	0	0	0	0	0	121	133	155	108	86	161	92	118	103	72	106	94	98	201	194	206	285	209	247	0.000265	0.000311	0.000359	0.0003	0.000249	0.000347	0.000317	0.000318	0.000314	0.000266	0.000315	0.000321
518	C7_02030W	HSP90	521	ATTTTTCCAGTGGTCTCCGT	TGG	0	+	131	no	-99	99	45	0	0	0	0	0	0	32	24	23	12	20	31	14	27	30	8	21	20	18	36	34	34	68	49	34	7.1627e-05	5.80331e-05	5.51864e-05	3.58195e-05	6.00043e-05	6.85552e-05	5.12008e-05	7.47526e-05	9.36358e-05	3.2778e-05	6.4779e-05	7.08739e-05
519	C7_02030W	HSP90	522	TGGCAACCAACGGAGACCAC	TGG	0	-	122	no	-90	90	60	0	0	0	0	0	0	370	138	73	57	43	82	40	61	55	47	62	22	39	50	46	46	85	74	87	0.000805	0.000323	0.00017	0.00016	0.000126	0.000178	0.00014	0.000166	0.000169	0.000175	0.000186	7.76238e-05
520	C7_02030W	HSP90	523	AGGTAGTAATATGGTGCTGC	TGG	0	-	267	no	-235	235	45	0	0	0	0	0	0	84	68	67	64	49	86	39	51	50	44	65	53	54	74	121	98	158	109	122	0.000184	0.00016	0.000156	0.000179	0.000143	0.000186	0.000137	0.000139	0.000154	0.000164	0.000194	0.000182
521	C7_02030W	HSP90	524	AACGGGAGGAGTTGATAAAC	TGG	0	-	70	no	-38	38	45	0	0	0	0	0	0	7236	6665	6634	5753	5371	7285	4639	5959	5563	4587	5200	4683	5424	9485	10003	10228	14109	8672	10951	0.015708	0.0154739	0.0152567	0.0158543	0.0153497	0.0156092	0.0158381	0.0159116	0.016806	0.0167095	0.0153144	0.0158082
522	R-_sgRNA 1		525	CTGCAGAGAGATCATAACTT		1			no			40	0	0	0	0	0	0	603	570	521	494	417	665	367	547	508	397	471	381	440	822	924	991	1150	705	952	0.001311	0.001325	0.0012	0.001364	0.001194	0.001427	0.001256	0.001463	0.001537	0.00145	0.00139	0.001289
523	R-_sgRNA 2		526	CGGGGTACGGCTTTAATACT		1			no			50	0	0	0	0	0	0	244	196	221	161	180	216	162	167	186	140	181	127	160	309	332	292	429	259	340	0.000532	0.000457	0.00051	0.000446	0.000517	0.000465	0.000556	0.000449	0.000565	0.000514	0.000536	0.000432
524	R-_sgRNA 3		527	ATAGATTTTTTGCCGGTACA		1			no			35	0	0	0	0	0	0	4140	4109	3917	3240	3175	4433	2487	3769	3178	2567	3192	2669	3153	5403	6080	6200	8190	4955	6433	0.008988	0.009541	0.009009	0.00893	0.009075	0.009499	0.008493	0.0100649	0.009602	0.009353	0.009402	0.009011
525	R-_sgRNA 4		528	TAACATTGGAGTCGCTACTC		1			no			45	0	0	0	0	0	0	357	287	314	281	294	362	226	302	292	241	258	221	313	456	494	508	643	393	506	0.000777	0.000669	0.000724	0.000777	0.000843	0.000778	0.000775	0.000809	0.000885	0.000881	0.000763	0.000749
526	R-_sgRNA 5		529	AGCAGAGTGCATAGCTACTC		1			no			50	0	0	0	0	0	0	80	75	83	45	65	80	45	60	46	58	40	49	44	102	92	105	152	104	89	0.000176	0.000176	0.000193	0.000127	0.000189	0.000174	0.000157	0.000163	0.000142	0.000215	0.000121	0.000169
527	R-_sgRNA 6		530	AAGGGAGTCGTAATAGGAAG		1			no			45	0	0	0	0	0	0	4858	4079	4328	3601	3494	4644	2860	3338	2988	2484	3422	2958	3361	4872	5093	5331	9140	5455	6933	0.0105465	0.009471	0.009954	0.009925	0.009986	0.009951	0.009766	0.008914	0.009028	0.00905	0.010079	0.009986
528	R-_sgRNA 7		531	GCATGACTGTGGATAGAGGT		1			no			50	0	0	0	0	0	0	594	597	483	458	467	572	360	479	476	357	453	388	436	760	760	772	1164	668	986	0.001291	0.001388	0.001113	0.001265	0.001337	0.001228	0.001232	0.001281	0.001441	0.001304	0.001337	0.001313
529	R-_sgRNA 8		532	TCCACTGGACTCGCCCCCTC		1			no			70	0	0	0	0	0	0	448	417	420	339	336	444	321	332	325	279	336	267	309	588	542	592	823	552	622	0.000975	0.00097	0.000968	0.000937	0.000963	0.000953	0.001099	0.000889	0.000985	0.00102	0.000992	0.000904
530	R-_sgRNA 9		533	TACCACGTCTTCAGATCTCG		1			no			50	0	0	0	0	0	0	265	231	332	228	222	294	165	201	191	173	215	174	211	364	347	369	513	330	515	0.000577	0.000539	0.000766	0.000631	0.000637	0.000632	0.000567	0.000539	0.00058	0.000634	0.000636	0.000591
531	R-sgRNA 10		534	ATCAGTCCGAAGCCGTGCGG		1			no			65	0	0	0	0	0	0	189	212	247	190	169	223	152	179	177	150	134	164	182	272	352	331	507	260	413	0.000412	0.000494	0.00057	0.000526	0.000486	0.00048	0.000522	0.000481	0.000538	0.00055	0.000398	0.000557
532	R-sgRNA 11		535	GTCCAACTAAATGGTGCCAC		1			no			50	0	0	0	0	0	0	130	201	188	130	136	137	106	147	136	104	133	148	136	255	219	257	385	179	296	0.000284	0.000469	0.000435	0.000361	0.000391	0.000296	0.000365	0.000395	0.000414	0.000382	0.000395	0.000503
533	R-sgRNA 12		536	GTCACAGCTCTACTACAGCA		1			no			50	0	0	0	0	0	0	811	776	695	644	597	893	514	735	579	523	617	520	597	1090	1129	1120	1460	969	1274	0.001762	0.001804	0.0016	0.001777	0.001709	0.001915	0.001758	0.001965	0.001752	0.001908	0.00182	0.001758
534	R-sgRNA 13		537	TCTCGCGACTGCCACATAAC		1			no			55	0	0	0	0	0	0	224	201	210	195	177	237	126	152	168	161	173	129	197	311	345	293	404	277	321	0.000488	0.000469	0.000485	0.00054	0.000509	0.00051	0.000434	0.000408	0.00051	0.00059	0.000512	0.000439
535	R-sgRNA 14		538	GACGGTGAAGTCGGTTGGCA		1			no			60	0	0	0	0	0	0	530	467	493	428	376	480	350	456	452	358	395	343	394	772	855	710	1000	591	816	0.001153	0.001086	0.001136	0.001182	0.001077	0.00103	0.001198	0.00122	0.001368	0.001307	0.001166	0.001161
536	R-sgRNA 15		539	TAAAGCTTAGGGACCGGAGT		1			no			50	0	0	0	0	0	0	334	270	298	234	266	292	203	259	235	175	246	180	226	386	461	466	560	354	402	0.000727	0.000629	0.000688	0.000648	0.000763	0.000628	0.000696	0.000694	0.000713	0.000641	0.000727	0.000611
537	R-sgRNA 16		540	CCGTGTGCGATCCCTTCTTT		1			no			55	0	0	0	0	0	0	2144	2231	2134	1882	1817	2352	1493	2168	2082	1662	1626	1452	1746	4080	4606	4602	4478	2872	3619	0.004656	0.005181	0.004909	0.005188	0.005195	0.005041	0.0051	0.005791	0.006292	0.006057	0.004791	0.004904
538	R-sgRNA 17		541	AGACTCCAGCGTTGGCCAAA		1			no			55	0	0	0	0	0	0	2064	1993	1926	1616	1537	2005	1392	1796	1744	1299	1573	1398	1633	2932	3196	3162	4152	2556	3126	0.004482	0.004629	0.004431	0.004455	0.004395	0.004298	0.004755	0.004798	0.005271	0.004735	0.004635	0.004722
539	R-sgRNA 18		542	AGCTCTACTGTTACAAGGGG		2			no			50	0	0	0	0	0	0	388	378	364	306	339	403	279	198	213	158	313	275	316	138	178	217	812	416	669	0.000844	0.00088	0.000839	0.000846	0.000971	0.000866	0.000956	0.000531	0.000646	0.000579	0.000925	0.000931
540	R-sgRNA 19		543	GCTAGCTTCACTAGGGGTAA		1			no			50	0	0	0	0	0	0	8436	8209	8645	7001	6769	8887	5516	7877	6729	5367	6654	5808	6626	11932	12236	12917	17397	10576	13460	0.0183126	0.019058	0.0198809	0.019293	0.019344	0.0190412	0.018832	0.0210322	0.020328	0.01955	0.0195957	0.0196051
541	R-sgRNA 20		544	TCGGCCCTAGACTCAATATG		1			no			50	0	0	0	0	0	0	836	743	747	644	603	740	515	685	571	499	627	535	541	1070	1166	1154	1618	1036	1204	0.001817	0.001727	0.00172	0.001777	0.001726	0.001587	0.001761	0.001831	0.001728	0.001821	0.001849	0.001809
542	R-sgRNA 21		545	GATGGGGGCCAAGTTCGTGA		1			no			60	0	0	0	0	0	0	439	375	390	285	306	400	245	316	327	279	272	217	292	577	516	694	707	468	676	0.000955	0.000873	0.000899	0.000788	0.000877	0.000859	0.00084	0.000846	0.000991	0.00102	0.000804	0.000736
543	R-sgRNA 22		546	GATCTGGCTCGGGACTCGTT		1			no			60	0	0	0	0	0	0	365	312	295	322	266	366	225	305	297	227	257	238	253	503	527	635	712	441	536	0.000794	0.000727	0.000681	0.00089	0.000763	0.000786	0.000771	0.000817	0.0009	0.00083	0.00076	0.000807
544	R-sgRNA 23		547	TCCGCTGCGCAAACTTCACT		1			no			55	0	0	0	0	0	0	739	610	626	521	456	673	401	554	486	390	428	363	471	740	876	925	1112	747	895	0.001606	0.001418	0.001442	0.001438	0.001306	0.001444	0.001372	0.001482	0.001471	0.001424	0.001263	0.001228
545	R-sgRNA 24		548	TGGACCAGGTTCACCGAGTG		1			no			60	0	0	0	0	0	0	7850	7598	7680	6452	6143	8145	5229	6913	6475	5358	6049	5476	6120	11882	12558	12729	16536	10230	12808	0.0170407	0.0176397	0.0176619	0.0177802	0.0175555	0.017452	0.017852	0.018459	0.0195608	0.019518	0.0178142	0.0184846
546	R-sgRNA 25		549	TCTTCCCATTCGGACCCAAG		1			no			55	0	0	0	0	0	0	566	523	514	420	435	572	361	446	385	326	413	337	327	732	790	839	1013	599	815	0.001231	0.001216	0.001184	0.00116	0.001246	0.001228	0.001236	0.001193	0.001166	0.001191	0.001219	0.001141
547	R-sgRNA 26		550	TGTTTAGGCAGTGATCAGCC		1			no			50	0	0	0	0	0	0	253	252	249	178	176	285	156	189	169	151	161	176	164	220	340	349	413	312	369	0.000551	0.000587	0.000575	0.000493	0.000506	0.000613	0.000536	0.000507	0.000513	0.000554	0.000477	0.000597
548	R-sgRNA 27		551	GGTATCGTCGTGTCTCATTA		1			no			45	0	0	0	0	0	0	1851	1641	1648	1402	1313	1683	1172	1499	1312	1096	1306	1121	1323	2477	2605	2602	3503	2042	2772	0.00402	0.003812	0.003792	0.003866	0.003755	0.003608	0.004004	0.004005	0.003966	0.003995	0.003848	0.003787
549	R-sgRNA 28		552	CGCGTCCAGGTTCTTCTGGA		1			no			60	0	0	0	0	0	0	707	632	664	537	500	717	440	595	501	453	494	422	561	994	1003	1159	1370	791	1089	0.001537	0.001469	0.001529	0.001482	0.001432	0.001538	0.001505	0.001591	0.001516	0.001653	0.001458	0.001428
550	R-sgRNA 29		553	TGTTGGATCGTCCCTAGGAA		1			no			50	0	0	0	0	0	0	2985	2820	2719	2355	2203	3133	2015	2519	2178	1879	2265	1891	2229	3908	4170	4003	5642	3523	4437	0.006481	0.006548	0.006254	0.006492	0.006298	0.006714	0.006881	0.006728	0.006582	0.006847	0.006672	0.006385
551	R-sgRNA 30		554	TCTGACGATCTGTTGTGAGA		1			no			45	0	0	0	0	0	0	129	155	152	134	115	164	122	157	135	103	129	101	118	202	168	235	310	199	287	0.000282	0.000362	0.000352	0.000372	0.000331	0.000353	0.00042	0.000422	0.000411	0.000379	0.000383	0.000344
552	Plasmid Backbone		555	TGAAGAGCCATTAATGCTCTTCC		2			no			43.4783	0	0	0	0	0	0	551	385	1186	409	268	408	215	354	342	171	273	174	343	614	243	231	436	251	415	0.001198	0.000896	0.002729	0.00113	0.000769	0.000876	0.000737	0.000948	0.001036	0.000626	0.000807	0.000591
[truncated: 52 more columns]

## Sheet: Table_S7
	Gene	alias	SgRNA	Barcode	PAM	control	strand	atg_dist	B_mismatch	dist_TSS	abs_TSS_dist	GC_content	ATC_control_T0_1	ATC_control_T0_2	ATC_control_T0_3	NoATC_control_T0_1	NoATC_control_T0_2	NoATC_control_T0_3	ATC_YPD_T3_1	ATC_YPD_T3_2	ATC_YPD_T3_3	NoATC_YPD_T3_1	NoATC_YPD_T3_2	NoATC_YPD_T3_3	ATC_LAC_T3_1	ATC_LAC_T3_2	ATC_LAC_T3_3	NoATC_LAC_T3_1	NoATC_LAC_T3_2	NoATC_LAC_T3_3	ATC_GLY_T3_1	ATC_GLY_T3_2	ATC_GLY_T3_3	NoATC_GLY_T3_1	NoATC_GLY_T3_2	NoATC_GLY_T3_3	ATC_ACE_T3_1	ATC_ACE_T3_2	ATC_ACE_T3_3	NoATC_ACE_T3_1	NoATC_ACE_T3_2	NoATC_ACE_T3_3	ATC_NACL_T3_1	ATC_NACL_T3_2	ATC_NACL_T3_3	NoATC_NACL_T3_1	NoATC_NACL_T3_2	NoATC_NACL_T3_3	ATC_SORB_T3_1
0	C1_00220W	PHR2	1	TTGGCTTTCCTCCCCTTAAC	TGG	0	+	112	no	-9	9	50	597	520	734	502	682	518	186	667	668	830	917	1130	814	925	952	1196	1122	1694	323	495	579	953	664	915	693	570	507	1156	1066	1122	642	692	598	1924	1028	1920	398
1	C1_00220W	PHR2	2	TCCTTGAATTTCTTGGTAGA	AGG	0	-	45	no	58	58	35	998	1080	1325	967	1308	964	355	1391	1234	1391	1399	1856	1340	1714	1660	1627	1594	2304	452	877	1078	1417	944	1215	1211	1044	940	1557	1133	1478	968	1104	1009	2536	1290	3086	705
2	C1_00220W	PHR2	3	CGATGATTCCTTGAATTTCT	TGG	0	-	38	no	65	65	35	28	41	60	45	48	46	12	46	63	63	81	61	78	87	94	67	144	73	31	39	40	39	56	101	24	43	56	64	49	44	51	26	20	113	21	88	76
3	C1_00220W	PHR2	4	CAACAGTAGCAGAATTGTAC	AGG	0	+	288	no	-185	185	40	434	474	674	448	613	409	127	500	536	410	554	867	555	592	575	655	590	934	241	417	422	382	447	554	583	395	432	473	523	573	404	574	577	513	297	597	275
4	C1_00400W	SVF1	5	TTAATGTCGCTTAGTGATGG	AGG	0	-	177	no	-89	89	40	606	636	706	581	752	592	213	681	726	589	574	768	800	724	807	695	931	1300	298	446	632	819	650	666	440	599	445	450	351	539	495	559	514	38	17	58	277
5	C1_00400W	SVF1	6	AGTTTAATGTCGCTTAGTGA	TGG	0	-	174	no	-86	86	35	1845	1735	2385	1787	2233	1653	580	2001	1662	1784	1811	2057	2126	2563	2539	2119	2310	3113	881	1647	1921	1780	1359	1604	1843	1511	1530	2165	1401	1980	1239	1319	1431	1743	917	1851	798
6	C1_00400W	SVF1	7	ATTAACAAAGGGTAAGGATC	AGG	0	-	94	no	-6	6	35	183	186	206	163	210	185	55	161	160	126	159	199	172	241	203	170	176	221	68	85	181	154	148	126	180	131	143	170	96	144	79	118	108	134	55	129	66
7	C1_00400W	SVF1	8	AGTGAGTACGACAAACAAAT	AGG	0	-	219	no	-131	131	35	4968	4875	6506	4220	5912	4482	1480	5721	5064	3792	4341	5093	5506	7555	6447	4815	5311	7889	2420	3931	4644	4739	3704	4445	4802	4208	3771	4898	3725	4359	3328	3897	2969	3008	1709	3342	2782
8	C1_00450C	C1_00450C	9	CAATATACCTTTATCTTGTG	AGG	0	-	54	no	-8	8	30	6	13	38	5	14	16		18	17	20	18	24	26	11	3	16	8	22	2	17	30	11	13	11	10	8	9	36	13	45	5	3	7	29		9	5
9	C1_00450C	C1_00450C	10	ATGGCTAAATGACGAATTCA	CGG	0	+	288	no	-242	242	35	1433	1536	1854	1389	1696	1471	478	1691	1635	1932	1857	2251	2055	2428	2184	2002	2350	3132	756	1294	1515	1622	1435	1840	1583	1425	1301	1822	1724	2032	1367	1685	1484	1875	1132	2073	783
10	C1_00450C	C1_00450C	11	TGTCTCTGTCTCTAGCTTTC	AGG	0	-	233	no	-187	187	45	1935	1742	2328	1864	2294	1823	863	2284	2004	2247	2207	3066	2292	2911	2699	2392	2515	4300	894	1758	1737	2057	1632	2142	1921	1709	1638	2150	1708	1988	1674	1978	1682	2052	1131	2313	1231
11	C1_00450C	C1_00450C	12	TGAAAAACCTCACAAGATAA	AGG	0	+	64	no	-18	18	30	2930	2756	3758	2689	3314	2639	1100	3438	3190	3235	3479	4320	3839	4328	4295	4276	4710	6712	1679	2617	3187	4098	2780	3455	3454	2870	2658	4253	3010	3996	3091	3237	3097	3746	2264	4364	1992
12	C1_00510W	C1_00510W	13	CATTGTATTTCGTTCATCCT	CGG	0	+	157	no	-93	93	35	316	225	283	193	311	204	56	267	228	285	275	354	276	335	390	327	327	550	158	188	260	249	256	255	260	187	190	307	196	277	258	238	206	159	91	156	178
13	C1_00510W	C1_00510W	14	ATCTCGTTCCCCAACAAGTT	AGG	0	+	133	no	-69	69	45	2577	2363	2975	2145	2801	2274	714	2112	2014	745	756	1156	2688	3552	3171	1574	1701	2428	1128	1756	2134	1506	1302	1398	2642	1874	1937	1261	1031	1117	1211	1548	1248	84	83	145	1203
14	C1_00510W	C1_00510W	15	TCTCGTTCCCCAACAAGTTA	GGG	0	+	132	no	-68	68	45	4847	4456	6190	4287	5196	4068	1186	4450	3747	709	806	1049	5292	6294	5424	1945	1870	3017	2133	3721	3720	1941	1359	1896	4437	3472	3599	1661	1236	1599	2315	2888	2429	111	46	129	1938
15	C1_00510W	C1_00510W	16	TGTTGGGGAACGAGATTCCG	AGG	0	-	137	no	-73	73	55	8037	7361	9863	7758	9770	7656	2880	9293	8944	16822	16136	18340	10574	12687	12142	13893	15245	22040	3914	6449	7853	9617	7731	8535	9135	7470	7300	12180	9020	11586	6854	8991	7881	21894	11956	24329	4426
16	C1_01070C	KRP1	17	CATATGTTTCCAATAGTATC	GGG	0	-	197	no	-90	90	30	4	9	16	13	14	19							7	6	6		23		2	58	8	7	3	5	6		9			1				8		10	3
17	C1_01070C	KRP1	18	GTATGGGTATTCAAAGTTGT	GGG	0	-	63	no	44	44	35	1719	1589	2321	1720	2063	1556	733	2232	1970	2240	2383	2816	2539	2938	2406	2431	2636	3667	999	1253	1582	2053	1698	1869	1887	1595	1677	2162	1842	2153	1753	1937	1542	2741	1554	3646	887
18	C1_01070C	KRP1	19	TGTATGGGTATTCAAAGTTG	TGG	0	-	62	no	45	45	35	7985	7941	9707	7589	9706	7489	2788	8790	8849	9667	10165	13261	10260	12001	11231	9911	10927	16068	3887	6274	7413	9129	7358	8380	9459	7422	7312	9903	7805	9937	7185	9238	8282	14828	8952	17297	4939
19	C1_01070C	KRP1	20	ATATAAGAACCCGATACTAT	TGG	0	+	209	no	-102	102	30	7		3		1	6									7		2		4	9
20	C1_01600W	MRP20	21	ATCTTGAAGGGAGGAGTAGA	AGG	0	+	252	no	-223	223	45	2734	2680	3547	2454	3485	2619	884	3125	3365	2160	2432	3039	3816	4621	4021	2981	2592	4610	1670	2516	2976	2996	2305	2675	3265	2442	2555	1907	1709	1969	2549	3115	2830	2278	1254	2532	1629
21	C1_01600W	MRP20	22	TTGAAGGGAGGAGTAGAAGG	TGG	0	+	249	no	-220	220	50	3574	3446	4559	3367	4349	3458	1067	3697	3794	1054	1177	1158	4313	5142	4462	2625	2556	4018	1632	2676	3103	2679	1984	2149	3192	2763	2599	1150	972	1219	2163	2961	2245	704	358	528	1667
22	C1_01600W	MRP20	23	GAGGAGTAGAAGGTGGTGCA	AGG	0	+	242	no	-213	213	55	969	807	1176	899	1048	833	259	1167	1028	270	292	469	1244	1317	1382	403	524	765	420	704	808	461	325	432	1203	769	884	241	216	279	779	1080	893	101	63	199	663
23	C1_01600W	MRP20	24	GTGGTGCAAGGTTGATTGAA	TGG	0	+	230	no	-201	201	45	1465	1359	1812	1377	1724	1327	488	1862	1548	352	475	552	1694	2136	2134	622	594	1001	710	1122	1379	622	482	492	1582	1259	1246	369	296	374	1007	1419	1275	402	288	523	622
24	C1_01950C	C1_01950C	25	ATACTTGAGGTAGTGTATGG	AGG	0	+	142	no	-115	115	40	2642	2778	3280	2569	3210	2543	834	2833	2879	1225	1326	1571	3223	3578	3384	1394	1469	2103	1216	1963	2259	1580	825	1190	2319	2230	2070	954	675	780	1987	2200	2094	475	248	609	1272
25	C1_01950C	C1_01950C	26	CGACGATCGACTTCCGTCTC	AGG	0	+	221	no	-194	194	60	18	11	3	8	8	7		14		6	27	20	11	15	31	13	2	7	5	2	10	17	18	10	21	10	5	1	1	20	11	2	22		47	11
26	C1_01950C	C1_01950C	27	CTCAGGATTGTCGTGCATTC	CGG	0	+	204	no	-177	177	50	1470	1327	1956	1330	1756	1331	567	1691	1646	1953	1928	2515	1686	2283	2019	1888	2112	2907	671	1105	1382	1505	1269	1521	1620	1237	1204	1808	1495	1826	1209	1843	1352	2025	1145	2169	794
27	C1_01950C	C1_01950C	28	GATTGTCGTGCATTCCGGCT	AGG	0	+	199	no	-172	172	55	741	633	871	608	770	670	246	749	778	788	742	796	1012	1157	1027	973	839	1402	342	475	606	719	577	817	802	612	580	920	721	789	598	611	703	722	347	628	493
28	C1_02420C	GSC1	29	ATATTTAAAAAAAAAGAAGG	GGG	0	-	61	no	312	312	15	78	66	109	56	78	44	35	96	81	2	3		90	95	95	13	31	70	46	68	60	38	16	26	116	65	74	11	2	9	67	41	36		5		32
29	C1_02420C	GSC1	30	TTAGTATATCAGTTGGGTGT	TGG	0	-	32	no	341	341	35	1676	1644	2073	1593	2013	1542	595	2178	2045	1771	1873	2333	2177	2748	2407	2106	2296	3478	772	1566	1555	2015	1521	1851	1928	1585	1535	1683	1423	1615	1456	1776	1584	266	187	382	930
30	C1_02420C	GSC1	31	GATAAGTTAGTATATCAGTT	GGG	0	-	26	no	347	347	25	781	817	1111	802	945	768	344	957	1206	988	982	1432	1095	1446	1320	1277	1351	2122	412	718	829	1042	884	1015	1094	707	803	1104	937	1280	767	1002	811	1502	1040	2152	479
31	C1_02420C	GSC1	32	AGATAAGTTAGTATATCAGT	TGG	0	-	25	no	348	348	25	465	473	580	454	597	515	141	461	592	580	601	549	624	656	731	655	751	987	233	372	384	623	474	570	668	475	487	583	452	784	317	422	331	225	107	158	234
32	C1_02510W	C1_02510W	33	TGAACTTAGAGTCCGTATAC	TGG	0	+	144	no	-83	83	40	2249	2156	2761	1895	2551	2106	775	2470	2262	627	654	765	2957	3487	2945	1519	1449	2392	1106	1813	2272	1450	1097	1485	2472	1949	1866	1122	902	1195	1452	1877	1665	1000	349	1065	1134
33	C1_02510W	C1_02510W	34	ATTGACGTGTTCATAAAATG	TGG	0	-	163	no	-102	102	30	302	296	266	278	308	241	81	345	348	145	172	232	399	463	273	281	222	370	127	197	245	225	171	172	285	285	218	216	189	245	233	257	210	6	5	46	135
34	C1_02510W	C1_02510W	35	AGTTACGATCTTTGTTGTTG	TGG	0	-	26	no	35	35	35	6418	5832	7915	5909	7427	5784	2507	7552	7203	8432	8923	11465	8128	9874	8814	9233	10037	14946	3128	5296	6321	7987	6060	7014	7056	5895	5775	9130	7091	9101	6228	6925	6279	12331	7489	14393	3799
35	C1_02510W	C1_02510W	36	ATATTGAAGGGGTTGGTTAT	TGG	0	-	280	no	-219	219	35	431	369	510	431	515	448	168	458	470	503	501	1024	599	687	595	590	728	1166	204	433	461	533	450	596	477	365	369	715	519	720	488	578	528	781	424	975	262
36	C1_02620C	HOM6	37	CTACTGTTGTTGTTGCGTCT	GGG	0	+	168	no	-138	138	45						2
37	C1_02620C	HOM6	38	TACTGTTGTTGTTGCGTCTG	GGG	0	+	167	no	-137	137	45	4874	4893	6317	4770	5985	4576	1934	5871	5702	6867	7072	8673	6628	7795	7390	7384	7620	11377	2290	3966	4388	5297	4602	5502	5891	4558	4397	5642	4593	5738	4071	5521	4673	4407	2451	4936	2889
38	C1_02620C	HOM6	39	TGCGTCTGGGGCGCCTTTAC	CGG	0	+	155	no	-125	125	65	1397	1131	1449	1067	1596	1243	392	1244	1075	1464	1280	1853	1536	1728	1465	1519	1518	1940	535	855	1157	928	924	938	1283	1133	1005	1306	1125	1391	1043	1413	1154	2513	1316	2509	616
39	C1_02620C	HOM6	40	ACTCCTTCCGATCTTGTTAC	CGG	0	-	133	no	-103	103	45	5679	5266	7014	5246	6536	4870	1332	4666	3943	5568	5608	7341	4129	5314	4713	5338	5347	8209	1657	2587	3332	4490	3329	4222	4214	3726	3817	5857	4904	6028	3493	4397	3796	7724	4543	7958	2021
40	C1_02660C	MGM101	41	TGATAAATTACACAGCTTTA	AGG	0	+	151	no	-96	96	25	6627	7132	9031	6526	8371	6279	2830	8854	8691	9197	9457	12246	10142	12388	11872	11391	12624	18130	3925	6408	7563	9997	7095	8257	8844	7299	7229	9794	7635	9864	6574	7893	6881	7358	3947	8544	4364
41	C1_02660C	MGM101	42	TAAATTACACAGCTTTAAGG	TGG	0	+	148	no	-93	93	30	1275	1304	1662	1107	1478	1200	478	1518	1342	303	336	452	1709	2166	1910	775	1082	1995	707	1195	1375	883	631	785	1515	1147	1143	377	241	369	1081	1221	1294	121	168	400	849
42	C1_02660C	MGM101	43	TAAGGTGGTGTCTAACATCT	TGG	0	+	133	no	-78	78	40	685	736	823	734	792	686	181	736	838	120	140	207	733	892	929	497	477	709	324	562	594	468	249	333	714	485	533	274	191	205	416	515	392	52	48	59	333
43	C1_02660C	MGM101	44	AATAACAAATGAGTTGGCGA	CGG	0	-	49	no	6	6	35	1914	1915	2375	1856	2301	1886	611	2215	1935	345	483	620	2335	3225	2703	1587	1725	2564	1014	1634	2048	1389	934	1328	2206	1798	1809	984	816	1042	1293	1522	1479	72	72	125	1047
44	C1_02960C	C1_02960C	45	TGATTGTTATAGAACAATGG	TGG	0	-	202	no	-136	136	30	695	740	916	750	897	686	282	910	831	231	242	370	1023	1306	930	554	667	896	464	687	710	524	425	607	782	675	668	255	134	236	497	564	622				405
45	C1_02960C	C1_02960C	46	CTTTGATTGTTATAGAACAA	TGG	0	-	199	no	-133	133	25	94	42	61	59	45	50	147	452	697	222	128	798	948	1738	2133	1233	1167	1215	274	644	793	1106	600	854	1754	1276	944	661	543	1226	448	581	560	949	478	1147	562
46	C1_02960C	C1_02960C	47	AAAAGAATCATTAACGGGGA	TGG	0	+	56	no	10	10	35	3300	3408	4372	3162	3873	3229	959	3248	3312	1961	1835	2513	3872	4656	4255	2916	2999	4608	1499	2522	2937	2747	1887	2287	3169	2659	2648	1713	1613	1857	2172	2523	2196	232	62	194	1584
47	C1_02960C	C1_02960C	48	AAAGAATCATTAACGGGGAT	GGG	0	+	55	no	11	11	35	9287	9711	12380	9190	11674	8687	3686	11466	11448	11680	13192	16348	12590	15712	13874	13122	15096	21734	4948	8182	9728	11791	8611	10724	10847	8659	8769	11362	9140	11180	8253	9614	8934	8144	4482	9590	5716
48	C1_03280W	C1_03280W	49	TCTTGCCTATAAGTTGAAGA	AGG	0	+	177	no	-126	126	35	2137	2101	2806	2028	2321	1907	783	2211	2344	900	1114	1269	2731	3424	3078	1611	1486	2404	1037	1803	2049	1597	1166	1356	2265	2007	1871	904	716	929	1443	1645	1720	8	17	43	1236
49	C1_03280W	C1_03280W	50	CTTGCCTATAAGTTGAAGAA	GGG	0	+	176	no	-125	125	35	161	162	201	183	156	157	70	130	196	8	7	7	199	282	210	2	8	12	71	104	223	1			136	102	133	1			84	120	147	13	3	11	83
50	C1_03280W	C1_03280W	51	AAGGGAAACAAAAAGTAGTG	TGG	0	+	158	no	-107	107	35	7265	7104	8905	7176	8719	6725	2456	7856	7906	2297	2464	2889	9303	10929	9869	3271	3680	5518	3544	5409	6980	3575	2333	3015	7245	6106	5977	1751	1323	1769	5202	6333	5967	2050	1308	2307	3731
51	C1_03280W	C1_03280W	52	ATAGGCATACGTACTAACAG	TGG	0	-	252	no	-201	201	40	1367	1202	1423	1094	1376	1138	422	1327	1400	275	303	450	1768	2106	2096	1246	1118	1623	724	1100	1271	1347	957	1233	1368	1166	1317	838	782	926	692	825	861	26	10	11	662
52	C1_03380W	TPS2	53	TAACAGATTCGAAGGTTCGC	CGG	0	-	203	no	-151	151	45	1779	1579	2095	1490	2110	1596	555	2317	1891	1912	2198	2597	2045	2512	2190	1983	2157	3300	888	1262	1622	1627	1457	1755	1838	1555	1482	2380	1943	2155	1488	1963	1492	1909	1185	2946	881
53	C1_03380W	TPS2	54	TTACATATGGCGTGCCCCCT	AGG	0	+	272	no	-220	220	55	119	82	132	95	92	96	22	80	277	134	106	132	119	151	172	139	114	192	76	102	61	62	67	108	72	59	132	133	136	176	57	95	55	143	42	80	31
54	C1_03380W	TPS2	55	GTACCGACAATTGATATTTA	TGG	0	-	119	no	-67	67	30	1439	1445	1764	1478	1810	1340	587	1710	1820	1964	1989	2713	1940	2384	2265	1896	2180	3021	798	1304	1560	1825	1406	1780	1956	1379	1370	2323	2085	2308	1430	1565	1296	1724	973	1952	849
55	C1_03380W	TPS2	56	AAACGAAAGTCAACTAAAAA	GGG	0	-	77	no	-25	25	25	924	960	1179	861	1085	880	284	812	1231	1144	1176	1527	1117	1305	1141	1282	1433	2033	447	736	856	1027	790	948	1114	819	887	1319	1043	1273	886	1043	913	1198	780	1651	597
56	C1_03980W	SPC19	57	TAATAAGATGATATTGTGTG	TGG	0	-	91	no	3	3	25	254	251	344	197	229	196	95	211	194	3	4		296	346	357	124	173	193	109	255	218	99	71	31	269	198	143	45	27	34	209	153	104				160
57	C1_03980W	SPC19	58	TTGAAAAAGGTCTAAGTAGA	TGG	0	-	63	no	31	31	30	539	554	656	510	697	490	225	614	683	678	811	925	632	787	813	874	1063	1285	275	368	562	823	578	647	742	494	407	801	646	834	602	826	575	1285	643	1437	448
58	C1_03980W	SPC19	59	ATATATGTATTAATTGAAAA	AGG	0	-	50	no	44	44	10	225	321	406	255	304	246	114	385	493	356	332	604	467	436	396	446	485	604	159	343	343	545	340	310	381	313	335	487	399	438	362	371	389	523	529	1052	282
59	C1_03980W	SPC19	60	TATATCTATGTGTATCTTAA	GGG	0	-	21	no	73	73	20	5691	5943	8089	5626	7246	5331	2381	7242	7827	7308	8061	10983	9268	9781	9009	9018	10460	14776	3613	6093	6675	9009	6151	7398	7421	6162	6054	9482	7546	9268	6680	7314	7110	9803	6203	13080	4253
60	C1_05500W	RSM22	61	TAAGACACAAAAGTGGAAAC	AGG	0	+	94	no			35	295	306	312	256	254	263	50	263	206	46	30	65	303	366	282	59	67	102	150	149	198	79	39	46	276	163	209	57	23	53	175	200	235		6	31	118
61	C1_05500W	RSM22	62	ACACAAAAGTGGAAACAGGA	AGG	0	+	90	no			40	1257	1077	1372	1076	1521	1174	206	663	602	12	18	12	758	1016	869	23	16	63	402	513	592	28	9	11	530	479	549	8	8	7	484	587	649				462
62	C1_05500W	RSM22	63	GTCGTTGTTTCTCATTTGGT	TGG	0	+	209	no			40	3175	2997	3835	3035	3779	2998	1090	4079	3322	3885	3988	4902	4259	5138	4870	5126	4987	7377	1606	2694	3055	4421	3040	3663	3882	2927	3101	4492	3252	4058	2651	3274	2771	271	118	339	1952
63	C1_05500W	RSM22	64	TCTCATTTGGTTGGTTGGTC	TGG	0	+	200	no			45	164	191	219	181	203	164	76	262	288	168	196	212	284	261	242	258	267	374	91	152	192	155	128	232	200	228	170	162	136	207	170	125	128	235	111	198	68
64	C1_05560W	RIB4	65	ATAAAACATATCATCATAAC	TGG	0	+	273	no	427	427	20	1039	1248	1395	1069	1405	1046	448	1478	1652	1697	2021	2302	1575	1840	1714	1889	2164	3116	588	1026	1257	1725	1149	1418	1368	1206	1215	2025	1640	2186	1290	1592	1321	4431	2455	4510	708
65	C1_05560W	RIB4	66	TTCTTCGTTGTCGTCGTTGT	TGG	0	+	64	no	636	636	45	2295	2165	3033	2002	2883	2119	787	2284	2318	2686	2764	3084	2606	3128	3040	2627	2592	4239	1041	1670	2014	2020	1891	2128	2502	1877	1826	2259	1852	2146	1959	2478	1910	498	332	444	1169
66	C1_05560W	RIB4	67	TTCACATGCTTATATACAGG	CGG	0	-	27	no	673	673	35	1116	1132	1599	1049	1377	1033	403	1533	1529	249	360	428	1606	2134	1750	866	1631	2929	603	1106	1333	1142	809	1052	1317	1202	1229	198	174	320	957	1312	1082		6		679
67	C1_05560W	RIB4	68	GTGTTCACATGCTTATATAC	AGG	0	-	24	no	676	676	35	44	78	89	49	90	57		54	86	7	9	33	116	125	55	30	9	32	43	91	46	39	42	12	87	69	60	26	24	36	18	31	45	11	2		40
68	C1_05780W	RSC9	69	CCAAGATGCATAGCTCTTGA	TGG	0	+	274	no	-184	184	45	61	63	69	47	85	44	12	66	54	89	64	106	44	134	43	69	82	81	20	69	44	111	39	74	114	49	47	108	36	63	36	45	40	98	51	76	56
69	C1_05780W	RSC9	70	TATGCATCTTGGCTGAGTAT	AGG	0	-	282	no	-192	192	40	12470	11449	15131	11644	14208	11384	4440	13803	13507	13959	16065	20123	16185	19749	17844	17036	19089	27242	6334	9687	12198	15121	11506	13560	13946	11063	10730	15805	12593	15195	11835	14211	12531	13595	7918	14220	6959
70	C1_05780W	RSC9	71	CCATCAAGAGCTATGCATCT	TGG	0	-	271	no	-181	181	45	2551	2645	3273	2457	3240	2521	880	3312	2924	3159	3598	4025	3427	4200	3766	3652	4414	6011	1330	2190	2441	3287	2482	3071	2907	2310	2220	3474	2769	3684	2154	2808	2530	4800	2809	5353	1501
71	C1_05780W	RSC9	72	CATATTGCAAAATATTGACA	TGG	0	+	204	no	-114	114	25	224	231	288	285	288	261	97	342	316	177	171	329	311	525	529	428	432	697	158	235	333	327	313	294	390	264	330	396	349	485	244	359	290	93	154	220	187
72	C1_06230C	MDM34	73	CTAACGGGTTATTCGTACTT	TGG	0	+	57	no	238	238	40	1073	1070	1335	1042	1290	1073	347	1274	1328	1529	1651	2377	1494	1947	1650	1715	1811	2740	651	914	1130	1460	1156	1245	1048	1190	1034	1460	1220	1517	1087	1175	1031	1760	1034	2223	640
73	C1_06230C	MDM34	74	TACGAATAACCCGTTAGAAT	TGG	0	-	60	no	235	235	35	511	534	874	603	727	557	120	442	384	592	569	685	464	807	485	626	785	875	224	313	417	494	425	454	452	448	394	609	485	592	345	473	485	679	474	1033	228
74	C1_06230C	MDM34	75	AAAAGTGTGCAAAAAGCTAT	AGG	0	-	19	no	276	276	30	1037	926	1282	952	1172	902	371	1308	1242	1315	1366	1911	1499	1605	1559	1406	1620	2401	489	950	1117	1398	970	1112	1239	1171	1075	1434	1046	1485	928	1241	935	1323	781	1497	556
75	C1_06230C	MDM34	76	TATATTTGAATCTACCACTT	TGG	0	+	229	no	66	66	25	4779	4917	6456	4746	6205	4792	2218	6123	6450	6438	7504	9512	7220	8763	7912	7537	9036	12574	3045	5011	5646	7157	5152	5910	6648	5332	5277	8505	6660	8410	5305	6152	5546	6579	4382	8410	3603
76	C1_06850W	PCL7	77	AGACCATTATCACAGCTATT	CGG	0	+	269	no	337	337	35	6237	6044	7726	5668	7118	5617	2151	6929	6496	4267	5135	6380	7714	9070	8271	6134	6659	10622	3153	5176	5849	5775	4399	5590	6243	5405	5000	4980	3871	4979	4611	5648	4847	1655	842	2202	3158
77	C1_06850W	PCL7	78	GTATGTTTCTATTATAATGG	GGG	0	-	27	no	579	579	25	910	973	1229	817	1067	825	396	1107	1373	479	551	693	1249	1475	1337	859	960	1697	532	928	997	1210	724	903	1155	919	868	677	531	555	861	910	959	15	9	12	543
78	C1_06850W	PCL7	79	TTTGTATGTTTCTATTATAA	TGG	0	-	24	no	582	582	15	85	93	79	75	104	65	36	83	146	118	164	185	152	113	116	159	166	235	60	72	86	94	91	100	102	85	101	139	99	141	64	55	64	297	170	238	53
79	C1_06850W	PCL7	80	ATACCGAATAGCTGTGATAA	TGG	0	-	263	no	343	343	35	3646	3627	4692	3374	4309	3416	1456	4631	4143	4477	4462	5984	4844	6170	5430	4973	5841	8507	1978	2990	3750	4736	3477	4119	3881	3434	3457	4685	3651	4612	3260	4074	3442	3624	2241	4657	2300
80	C1_07240W	YPD1	81	GCAGTGATAACCAATCAAGA	CGG	0	+	85	no	62	62	40	1781	1809	2246	1740	2092	1553	532	1927	1964	1597	1793	2147	1995	2832	2523	1913	2090	3160	938	1284	1669	2079	1359	1638	1841	1590	1538	1690	1509	1689	1313	1897	1655	822	452	873	1020
81	C1_07240W	YPD1	82	CAATGTAGTGCCGTCTTGAT	TGG	0	-	72	no	75	75	45	42	30	48	49	40	53	26	33	53	71	55	90	57	43	96	38	70	111	23	39	60	62	39	34	59	46	59	47	87	52	36	54	22	64	48	173	62
82	C1_07240W	YPD1	83	AAAGTTCTTGGAATACTAAG	AGG	0	+	36	no	111	111	30	869	947	1129	858	1105	852	262	1091	1241	80	170	232	1294	1674	1565	623	452	788	578	846	869	581	321	386	1195	977	968	296	179	210	554	937	767				582
83	C1_07240W	YPD1	84	TGTTAGCGCCAAAGAAAAAG	AGG	0	-	227	no	-80	80	40	3520	3313	4566	3099	4168	3057	1119	3640	3710	2483	2687	3388	4144	4981	4765	4214	4374	6371	1648	2404	2751	2923	2136	2448	3884	2829	2817	3513	2919	3327	3060	3674	3503	1927	1186	1943	1722
84	C1_07600W	ATP7	85	ATAGGTGTCACGTGAAACAG	TGG	0	+	278	no	-216	216	45	3086	2941	3999	2903	3839	2921	1095	3711	3464	491	502	955	3933	4787	4231	1716	1672	2775	1512	2503	2933	1914	1473	1966	3544	2762	2547	1164	941	1188	2144	2531	2296	168	173	169	1947
85	C1_07600W	ATP7	86	ATGGTTGTAAGAATTTGTGT	TGG	0	-	62	no	0	0	30	6351	6496	8084	6121	7981	6203	2247	7169	7634	11734	12361	13932	8468	10234	9175	10777	11940	17589	3485	5404	6749	7619	5901	6499	6972	5558	5744	9749	7174	9219	6055	7141	6146	17142	10253	21074	4012
86	C1_07600W	ATP7	87	GGATATTGCTATTGAAGATG	TGG	0	-	31	no	31	31	35	1016	990	1261	857	1299	893	330	1074	1349	347	390	480	1351	1425	1411	823	744	1126	542	986	1002	742	587	593	1103	826	841	296	258	351	833	977	803	99	60	127	498
87	C1_07600W	ATP7	88	AAATCTATGTCGTGTAGAAA	TGG	0	+	235	no	-173	173	30	146	138	177	129	159	146	43	183	216	186	168	321	245	246	181	263	212	258	79	110	155	198	152	177	155	159	77	98	126	172	152	192	136	159	129	203	86
88	C1_07910C	MRPL3	89	AAGCTGGAACAAATGTGAGA	AGG	0	+	175	no	-31	31	40	876	780	985	669	941	659	7	38	20		1		101	188	170			9	91	114	102			2	46	33	59		4		6		27		1		30
89	C1_07910C	MRPL3	90	TTTAGTCTTACCACTGGAAA	GGG	0	+	46	no	98	98	35	135	156	177	158	179	132	71	250	271	243	189	332	226	283	345	219	316	436	88	171	129	188	183	166	215	121	121	301	248	248	185	205	123	206	81	159	155
90	C1_07910C	MRPL3	91	TTAGTCTTACCACTGGAAAG	GGG	0	+	45	no	99	99	40	466	527	668	416	517	449	151	627	535	487	472	900	556	803	851	764	688	1144	288	478	433	621	369	437	591	391	492	474	375	447	312	452	313	2			290
91	C1_07910C	MRPL3	92	TTCCAGTGGTAAGACTAAAA	TGG	0	-	47	no	97	97	35	675	729	750	564	722	643	298	752	814	730	817	922	809	882	1014	990	791	1311	431	571	781	803	566	633	1056	577	572	719	455	696	645	691	635	531	347	625	400
92	C1_08920W	C1_08920W	93	TTCTTCCTTCGATTACCCAT	TGG	0	-	85	no	-48	48	40	42	28	51	39	38	42		12					22	1	6		2		3		4				10	8	2										7
93	C1_08920W	C1_08920W	94	TTATGTGGTTATTGTTGGGG	TGG	0	-	50	no	-13	13	40	959	905	1215	926	1216	921	348	902	1009	12	23	32	1212	1141	1256	123	133	233	460	627	815	172	75	114	811	767	716	58	50	83	712	717	618		11	13	619
94	C1_08920W	C1_08920W	95	GTTGTGGACTGTTGATTATG	TGG	0	-	35	no	2	2	40	4131	4056	5372	3871	5036	3960	1258	4538	4593	1955	2335	2195	4971	5930	5423	2158	2346	3653	1919	3368	3466	2379	1677	1855	4048	3095	3207	1058	871	931	2560	2943	2493	416	263	391	2030
95	C1_08920W	C1_08920W	96	GTGGGGTAAGGGGGTGGTTG	TGG	0	-	19	no	18	18	65	1142	1102	1263	1035	1332	1028	372	1155	1000	764	774	1120	1433	1672	1445	955	888	1180	451	831	1040	833	613	817	1045	763	854	453	361	505	1054	1204	997	352	200	290	580
96	C1_09030C	COX5	97	TTGAATACTTGTTGGGGGAG	GGG	0	-	11	no	431	431	45	1433	1485	1947	1472	1698	1445	580	1647	1603	1879	2058	2486	1916	2171	1918	1672	1953	2775	706	1145	1412	1926	1447	1627	1630	1347	1173	1854	1278	1701	1387	1454	1393	996	677	1101	863
97	C1_09030C	COX5	98	TAGTTAGTGGGATTTGGTAC	AGG	0	-	154	no	288	288	40					2
98	C1_09030C	COX5	99	TAAAATTAGTTAGTGGGATT	TGG	0	-	148	no	294	294	25	1878	1926	2745	1811	2340	1853	798	2523	2440	2457	2640	3381	3019	3249	3039	2827	3429	4853	1110	1985	2265	3102	2233	2495	2485	1869	2049	2831	2257	2820	2111	2518	2150	4074	2821	5732	1372
99	C1_09030C	COX5	100	GATTGGTTAAAATTAGTTAG	TGG	0	-	141	no	301	301	25	1011	1051	1418	997	1241	940	326	1239	1380	986	1045	1311	1475	1659	1537	1062	1471	1769	577	968	1143	1255	874	973	1218	962	1040	1083	845	1123	1056	1129	1177	174	181	284	590
100	C1_09450C	NUP188	101	AGACGTGGAAACTAGTAAAA	GGG	0	+	16	no	54	54	35	7637	7203	9939	7041	8855	6622	2457	8876	8695	9656	10144	12602	10121	12785	11251	10754	11918	17002	3996	6676	8113	9861	7334	8523	8429	7074	6880	10341	7969	10721	7165	9020	7527	12699	7229	14894	4781
101	C1_09450C	NUP188	102	GTATTTATTCGCAACACGCC	AGG	0	+	263	no	-193	193	45	113	72	78	91	91	75	35	97	101	9	11	6	128	111	129	54	41	63	45	65	77	17	40	13	109	48	47	28	23	30	77	36	85		7		20
102	C1_09450C	NUP188	103	ACTAGTTTCCACGTCTTAAT	TGG	0	-	20	no	50	50	35	1606	1691	2240	1679	2145	1589	570	1962	1864	1955	2001	2863	2181	2700	2539	2046	2200	3368	824	1455	1459	2167	1363	1487	2046	1439	1274	2289	1585	1955	1472	1824	1412	2675	1901	4015	791
103	C1_09450C	NUP188	104	TCTTTGATGGTTTAACTTCC	TGG	0	-	242	no	-172	172	35	806	778	989	789	1001	792	255	852	867	448	392	392	1112	1190	1222	517	626	765	426	629	755	417	291	379	941	714	695	482	304	437	468	509	598	485	213	557	369
104	C1_09960W	PET100	105	AGGGGAAACTAAGTTTAGTT	TGG	0	-	68	no	-35	35	35	11066	11025	14279	10631	13360	10369	3709	12998	12129	6297	6978	8399	13546	15799	14104	6591	7122	9827	5594	8850	10133	5546	3520	4156	10709	9093	8633	5526	4104	5083	8421	9972	8754	8183	4715	9420	5975
105	C1_09960W	PET100	106	CCAATTTATTGCCGCTGTTA	AGG	0	+	228	no	-195	195	40	12655	12320	16338	12317	15977	12124	4919	15935	16023	18111	19560	24665	17396	20737	19071	18397	20438	30271	6625	10804	12723	16034	12012	14184	14605	12169	11513	16973	13373	16792	12497	14676	12628	26911	15858	31174	8263
106	C1_09960W	PET100	107	CCTTAACAGCGGCAATAAAT	TGG	0	-	225	no	-192	192	40	174	170	196	170	219	169	53	192	210	299	258	331	199	274	189	279	330	604	89	144	197	173	203	209	174	132	172	283	258	260	146	128	183	78	39	78	97
107	C1_09960W	PET100	108	CACAATAGTTACCTTAACAG	CGG	0	-	214	no	-181	181	35	577	562	771	505	666	584	231	775	917	311	394	527	847	1017	899	550	716	1106	418	521	607	608	596	549	692	528	568	526	370	585	327	550	413	354	114	471	305
108	C1_10960W	C1_10960W	109	TGTCCGTTAGATTCCTGATG	AGG	0	+	169	no	-137	137	45	1939	1735	2323	1645	2124	1574	409	1295	1005	402	296	433	1750	2462	2105	639	690	951	675	1207	1249	500	374	533	1452	1263	1122	529	377	405	695	989	744	416	205	495	666
109	C1_10960W	C1_10960W	110	CAACCTCATCAGGAATCTAA	CGG	0	-	163	no	-131	131	40	115	74	126	91	104	92	6	36	143	153	97	106	117	178	150	166	160	245	52	85	65	51	49	87	88	71	78	126	84	74	33	69	57	110	77	292	13
110	C1_10960W	C1_10960W	111	GGTGGTTGTTTATGGATTGA	AGG	0	-	26	no	6	6	40	2807	2833	3703	2802	3451	2695	899	3559	3602	2649	3312	3990	3624	4491	4221	4043	4266	6063	1502	2801	3039	3013	2417	2971	2910	2741	2956	3321	2457	3216	2466	3161	2682	1028	806	1401	1617
111	C1_10960W	C1_10960W	112	GTTTGAAGGGTGGTTGTTTA	TGG	0	-	18	no	14	14	40	842	777	1139	798	980	790	331	860	995	1034	1017	1496	1257	1245	1213	1037	1312	1824	557	731	745	846	784	950	902	691	758	1011	738	1113	812	892	875	1167	760	1627	444
112	C1_11240C	CHO1	113	AAGAAGAGCTGAATGTGAGG	AGG	0	-	44	no	12	12	45
113	C1_11240C	CHO1	114	TGGAAGAAGAGCTGAATGTG	AGG	0	-	41	no	15	15	45	1			1	8	11					3	9		3	2		3	2	1	8	7	3		4		11	5	4	3	5			3		6
114	C1_11240C	CHO1	115	TATGTGTGGAGTAAGAAAAG	TGG	0	-	21	no	35	35	35	3785	3539	4572	3532	4278	3424	1420	4433	4322	4374	4538	5516	5000	5828	5832	5850	6495	9125	1952	3101	3928	4613	3446	4199	4379	3639	3078	4636	4017	4731	3690	4593	3659	5125	2698	5513	2246
115	C1_11240C	CHO1	116	CCTTAAGGCAAAATTACAAT	AGG	0	-	243	no	-187	187	30	889	887	1333	886	1124	896	371	997	958	953	1238	1417	1166	1600	1429	1336	1495	2495	473	823	953	1177	874	1043	1116	816	886	1216	925	1287	854	1118	866	1600	860	1913	603
116	C1_11500C	ARO7	117	GAATTGTAATAGCTTTATTG	TGG	0	-	30	no	28	28	25	646	650	826	622	834	629	297	920	1064	849	894	1122	961	1037	1074	1060	1156	1661	403	618	753	863	718	807	714	689	651	1046	856	1060	795	900	764	588	465	759	462
117	C1_11500C	ARO7	118	TACGTTGATTTCGAAATCCC	GGG	0	+	232	no	-174	174	40	354	370	477	417	493	385	131	349	562	462	526	676	492	599	591	555	595	822	157	273	315	367	337	439	351	366	348	629	444	453	255	432	350	479	279	709	164
118	C1_11500C	ARO7	119	ACGTTGATTTCGAAATCCCG	GGG	0	+	231	no	-173	173	45	547	436	584	463	634	448	166	628	612	525	544	749	725	784	697	755	762	1096	254	374	470	673	461	602	538	574	505	632	512	611	474	552	438	599	385	680	268
119	C1_11500C	ARO7	120	GTTCAATATATACATTACCC	CGG	0	-	211	no	-153	153	30		3	2		2				1
120	C1_12260W	VPH2	121	TCGCATTAGACGAGAGATTC	AGG	0	+	108	no	-19	19	45	251	228	303	214	292	281	82	389	270	416	441	373	289	509	436	404	387	724	127	195	323	379	267	318	296	208	188	384	286	352	214	251	251	359	278	544	132
121	C1_12260W	VPH2	122	CGCATTAGACGAGAGATTCA	GGG	0	+	107	no	-18	18	45	7641	6594	8573	6436	8832	6573	2100	7287	6578	4888	5655	6404	9010	10654	10553	8662	8921	13848	3566	5856	6730	6864	5461	6362	7735	5956	6010	7551	6137	7479	4569	5905	4837	8656	5045	9311	3790
122	C1_12260W	VPH2	123	ATGAGGCTAGATTTGATTAA	TGG	0	-	27	no	62	62	30	3378	3574	5037	3539	4349	3413	1332	4590	4297	4816	5093	6533	4972	5589	5574	5592	6023	8791	1928	3070	3790	5082	3811	4423	4098	3453	3453	5378	4380	5227	3804	4349	3925	2454	1286	3367	2382
123	C1_12260W	VPH2	124	GTTGCTATAAATAATAATAA	TGG	0	-	269	no	-180	180	15	203	259	305	199	265	188	148	334	341	313	374	429	365	387	384	413	490	635	130	243	379	496	299	326	378	264	245	454	338	439	345	278	342	355	291	512	177
124	C1_12360C	RIB3	125	TATTAAATAACACAAACTAG	GGG	0	-	142	no	73	73	20	2861	3265	4042	2968	3737	2880	1394	4432	4253	1015	1297	1661	4681	5755	5197	3678	4143	5745	1781	3166	3667	3468	2434	2808	4355	3435	3399	2919	2458	2644	4576	5024	4650	202	215	298	2576
125	C1_12360C	RIB3	126	TGTATTAAATAACACAAACT	AGG	0	-	140	no	75	75	20	3087	3476	4053	3145	4000	3014	1247	3795	3761	3991	4605	5752	4694	5212	4845	4713	5370	7954	1741	2985	3476	4412	3321	3659	3884	3037	2970	4998	3846	4754	3123	3762	3471	4556	2375	5453	2205
126	C1_12360C	RIB3	127	TATATATAAAGAAAGGGAGT	TGG	0	-	14	no	201	201	25	2397	2813	3631	2429	3126	2380	1122	3108	3529	1834	2234	2950	3790	4322	4048	3031	3533	4642	1530	2668	3033	3212	1914	2220	3421	3004	2711	2644	2088	2824	2288	2598	2638	316	250	465	1988
127	C1_12360C	RIB3	128	AAAGATCAGTTATATTTGTA	TGG	0	-	239	no	-24	24	20	908	857	1247	813	1081	792	318	988	1246	967	1049	1291	1089	1366	1431	1261	1408	1963	527	913	912	1186	834	1027	994	847	936	1040	770	1156	803	924	833	731	495	694	575
128	C1_12610W	C1_12610W	129	AATTTGAGGAATAATAATAT	TGG	0	-	131	no	-88	88	15	243	234	349	233	278	209	73	193	189	88	107	182	276	225	327	219	271	317	114	187	192	220	153	195	270	179	138	159	124	251	143	131	94	45	27	60	66
129	C1_12610W	C1_12610W	130	AGAAAGAACAAATGAATTTG	AGG	0	-	117	no	-74	74	25	10490	10689	13762	10079	13090	10144	3160	10256	10682	2352	2036	2752	10660	12398	12158	2135	2239	3612	4861	7411	8994	2201	1259	1891	7681	6428	6363	1327	987	1192	4422	5313	4805	2944	1754	3548	4474
130	C1_12610W	C1_12610W	131	GTGATAATGTTATATGTTGT	CGG	0	-	28	no	15	15	25	411	437	569	379	564	387	118	442	434	287	276	338	493	596	410	261	295	467	232	313	395	255	170	239	380	321	270	201	164	222	374	419	240	239	89	270	219
131	C1_12610W	C1_12610W	132	TGAGATGAGATTGAATATGA	AGG	0	+	213	no	-170	170	30	2990	2815	3911	2688	3490	2634	571	2014	1975	691	725	816	3080	3370	3323	845	1000	1376	1139	1881	2047	780	463	621	2284	1991	1923	724	505	660	1029	1266	1080	932	432	1046	1010
132	C1_12660W	C1_12660W	133	GATTGAAAGGCGGACGGGGA	GGG	0	-	233	no	-141	141	60	1119	960	1321	967	1243	974	348	1030	1131	917	1015	1106	1492	1646	1303	1015	1110	1592	431	903	1015	970	667	774	1100	758	811	701	670	798	676	807	914	313	138	375	531
133	C1_12660W	C1_12660W	134	ATTGGATTGAAAGGCGGACG	GGG	0	-	229	no	-137	137	50	3593	3499	4821	3452	4424	3494	1421	4288	4004	3305	4174	4713	4435	5492	5473	4718	5002	8084	2013	3102	3550	4086	3619	3911	3902	3313	3356	4302	3451	4347	2957	3800	3017	3984	2771	5235	2056
134	C1_12660W	C1_12660W	135	GATTGGATTGAAAGGCGGAC	GGG	0	-	228	no	-136	136	50	7206	6612	9036	6778	8735	6706	2297	8289	8179	7577	8526	10866	9587	11234	9762	10254	11275	16703	3686	6145	7397	9910	7557	8636	8165	6789	6683	9985	7665	10230	6227	7814	6939	12354	7386	13902	3996
135	C1_12660W	C1_12660W	136	AGATTGGATTGAAAGGCGGA	CGG	0	-	227	no	-135	135	45	390	370	465	415	519	343	202	402	363	435	351	427	610	629	566	497	640	867	253	370	359	565	312	522	362	353	459	468	457	503	373	383	290	457	244	462	235
136	C1_12810W	RIB7	137	CAAATTGCCTCCCACCACCA	AGG	0	+	145	no	-70	70	55	647	658	775	638	783	700	231	659	634	601	622	603	777	1023	984	742	846	1228	348	547	600	740	482	723	808	522	598	786	635	813	533	593	636	464	189	493	366
137	C1_12810W	RIB7	138	AAATTGCCTCCCACCACCAA	GGG	0	+	144	no	-69	69	50	527	512	701	488	624	454	147	582	488	222	247	242	714	778	648	378	411	537	216	326	556	282	252	226	467	417	434	445	330	335	421	660	441	8	35	135	354
138	C1_12810W	RIB7	139	GGTTGGTTGGTAGATTTCAA	GGG	0	-	67	no	8	8	40	4686	4765	6153	4470	5909	4468	1864	5145	5458	5728	6018	8221	5715	7205	6732	6330	6658	9596	2283	3997	4446	5554	4116	5034	4814	3936	4313	5576	4424	5729	4494	5074	4420	8050	5030	9320	2851
139	C1_12810W	RIB7	140	ATTGGGGTTTGTTTGTTAGT	TGG	0	+	240	no	-165	165	35	7948	7837	10078	7818	9871	7657	2940	9845	9374	9442	10456	12084	10273	12058	11171	10162	10692	15796	4197	6689	7607	9985	6842	7956	8838	7321	7152	9258	7198	9116	8112	8364	8052	13775	8831	15698	5257
140	C1_13370W	C1_13370W	141	AATGTTGATTTATCCATTAT	GGG	0	+	237	no	-172	172	20	183	222	248	143	202	165	73	204	200	235	190	182	221	234	316	273	199	395	106	93	173	189	199	166	166	140	131	253	219	181	172	197	154	240	132	395	123
141	C1_13370W	C1_13370W	142	TATCCATTATGGGGATGTGG	TGG	0	+	227	no	-162	162	45	1834	1986	2374	1673	2318	1692	639	2101	1941	405	440	585	2310	2991	2196	910	1108	1582	982	1547	1714	1324	839	1042	1713	1533	1544	677	559	574	1347	1596	1259	27	31	48	899
142	C1_13370W	C1_13370W	143	CCATTATGGGGATGTGGTGG	TGG	0	+	224	no	-159	159	55	206	189	314	185	253	199	65	206	300	202	182	240	230	381	302	323	304	369	105	163	164	223	252	348	221	140	106	213	135	276	155	186	142	99	34	68	85
143	C1_13370W	C1_13370W	144	CCACCACCACATCCCCATAA	TGG	0	-	221	no	-156	156	55	18280	16685	21648	16520	21455	16154	5332	21194	18254	21743	22106	27205	22839	26375	25415	25580	27901	42273	8984	14424	16804	21414	17278	20887	18258	15979	15425	22862	17668	21949	14291	18231	15390	665	322	766	10073
144	C2_00710W	NPL6	145	AAGGATTCTGCAAATTAAAA	AGG	0	+	244	no	-209	209	25	3539	3761	4926	3377	4689	3341	1512	4324	4856	4527	4951	6964	5191	6100	5585	5306	5893	8179	2281	3608	4439	5428	3379	4055	4488	3922	3930	5340	4447	5260	3993	4515	4242	7475	4723	9655	2313
145	C2_00710W	NPL6	146	GATTCTGCAAATTAAAAAGG	AGG	0	+	241	no	-206	206	30	724	656	895	740	814	607	216	933	802	899	1087	1207	846	1200	1026	1014	1310	1790	361	630	765	1295	805	976	721	668	683	1095	895	979	742	844	753	687	469	783	359
146	C2_00710W	NPL6	147	ATTCTGCAAATTAAAAAGGA	GGG	0	+	240	no	-205	205	25	783	899	1233	814	1093	800	271	1062	911	917	1020	1166	1386	1316	1325	1234	1172	1587	507	886	926	1046	867	904	1121	957	1002	876	616	955	844	974	801	465	325	488	608
147	C2_00710W	NPL6	148	TTCTGCAAATTAAAAAGGAG	GGG	0	+	239	no	-204	204	30	1370	1522	2019	1423	1778	1486	592	1615	1676	345	221	308	2435	2729	2667	574	705	901	925	1478	1830	1325	780	966	2079	1578	1489	439	386	375	1272	1336	1316	232	125	408	1119
148	C2_01030W	C2_01030W	149	CTATGTGTTGAAAATATAAT	AGG	0	+	168	yes	-154	154	20
149	C2_01030W	C2_01030W	150	CTATTATATTTTCAACACAT	AGG	0	-	166	yes	-152	152	20	32	27	43	29	24	22	9	24	17	33	36	38	42	34	28	41	31	67	13	24	46	30	12	37	3	14	25	38	38	29	40	14	19	8			2
150	C2_01030W	C2_01030W	151	GCTGAACGTCAAATAGCTAC	TGG	0	-	83	no	-69	69	45	72	63	103	57	67	79	45	69	109	21	7	8	118	312	134	25	495	21	48	312	198	29	71	429	107	122	50	36	6	79	61	43	55	51	9	17	37
151	C2_01030W	C2_01030W	152	GATTTACATTCTGAAGATTC	TGG	0	+	221	yes	-207	207	30	2			2
152	C2_01200C	REG1	153	AAGATGGGTTATGTGTGTGT	GGG	0	-	118	no	313	313	40	1159	1070	1136	923	1160	883	352	1048	1196	357	513	698	1355	1564	1388	1057	1145	1827	572	838	1019	1071	723	1104	1283	795	1013	1093	830	1050	809	955	796	751	280	669	677
153	C2_01200C	REG1	154	AAAGATGGGTTATGTGTGTG	TGG	0	-	117	no	314	314	40	1796	1808	2135	1636	2090	1574	604	1907	2114	2078	2304	2724	2473	2617	2394	2612	2953	4115	825	1467	1710	2289	1702	2071	2027	1512	1475	2225	1641	2052	1350	1770	1518	1848	1336	2571	991
154	C2_01200C	REG1	155	GACAACGACAACGATAAAGA	TGG	0	-	102	no	329	329	40	4197	3939	5127	3945	4921	3735	1441	4944	4862	3446	3614	4516	5673	6597	6663	5087	5439	8095	2055	3433	3979	4530	3568	4012	4913	4210	3422	4023	3120	3951	3473	4295	3651	226	136	333	2566
155	C2_01200C	REG1	156	ATAAACTCCGTATAAGATTG	GGG	0	-	228	no	203	203	30	2651	2922	3737	2784	3337	2316	981	3387	3046	3139	3699	4870	3862	4586	4418	3978	4499	6733	1519	2545	3029	3954	2900	3406	3484	2399	2594	4232	3323	3887	2773	3208	3128	4208	2733	5114	1876
156	C2_01300C	MNN24	157	AATAAGATAGAAAAGATGAA	TGG	0	-	198	no	-1	1	20	721	822	1184	737	899	720	360	1134	1000	509	578	811	1229	1299	1085	671	725	1032	447	771	789	594	450	527	915	767	767	548	446	490	761	800	732	149	68	216	542
157	C2_01300C	MNN24	158	GAACAAGTGAATAAGGTGAT	GGG	0	-	70	no	127	127	35	3886	3668	4754	3515	4689	3652	1578	4648	4561	5558	5644	7414	5551	6460	5725	6528	6674	9973	1973	3469	3945	5130	3784	4518	4242	3986	3436	5585	4698	5464	3566	4512	3761	7524	4502	8740	2244
158	C2_01300C	MNN24	159	TGAACAAGTGAATAAGGTGA	TGG	0	-	69	no	128	128	35	3491	3579	4540	3560	4310	3384	1290	4574	4088	5582	6062	7318	4780	5994	5099	5988	6361	9656	1874	3040	3470	4612	3349	4200	3692	3363	3474	5275	4130	5273	3312	3826	3174	6970	3722	7482	2199
159	C2_01300C	MNN24	160	GCTCCCTCAGAATTAGGTAT	TGG	0	-	30	no	167	167	45	15950	15094	19508	14761	18709	14674	4413	19572	17868	20300	21533	27787	21779	25230	23162	23740	25741	38558	7798	13442	15196	19964	15260	18351	17695	14675	14384	22235	17832	21661	14875	18868	16259	12985	7747	13492	9471
160	C2_02270C	C2_02270C	161	AAAAAAATTAAAGTGAGAAC	GGG	0	-	205	no	-160	160	20	545	544	753	566	609	527	247	750	704	447	534	621	841	883	756	442	525	796	256	487	583	462	280	390	545	351	480	398	273	385	343	538	545	58	30	68	372
161	C2_02270C	C2_02270C	162	TATGTATATATCTTTGTTTA	TGG	0	-	20	no	25	25	15	2911	3412	4788	2624	3429	2506	1087	3453	3705	1970	2400	2918	4002	4622	4172	2282	2644	3662	1775	2745	3391	2473	1672	1780	3194	2712	2530	2398	1892	2567	2477	2881	2800	2778	1899	3830	1904
162	C2_02270C	C2_02270C	163	AACAAACAAACAACTAACAT	AGG	0	+	242	no	-197	197	25	2783	3013	3758	2796	3580	2669	1122	3281	3484	2461	2621	3179	3684	4691	4297	3663	3964	5994	1603	2432	3110	3538	2497	3123	3082	2740	2552	2895	2073	2655	2842	3095	2819	968	514	1155	1620
163	C2_02270C	C2_02270C	164	AAACAACTAACATAGGTTTA	TGG	0	+	235	no	-190	190	25	1859	1882	2259	1861	2216	1664	676	2053	2268	2294	2300	2752	2778	3078	2622	2356	2726	4105	1019	1677	2120	2691	1628	1903	2100	1818	1648	2325	1985	2465	1779	2178	1921	3488	2077	4162	954
164	C2_03560C	C2_03560C	165	TGGCGCAAAGGACAAAAAAA	AGG	0	+	125	no	-99	99	40	18002	17507	22165	16901	21586	16819	6131	21411	20730	10052	11490	14025	22124	26047	24613	10801	10695	16552	8970	14472	16433	11515	7857	10008	18916	14718	14756	5613	4612	5568	9692	12312	10586	3917	1754	4145	9422
165	C2_03560C	C2_03560C	166	AGGAAATTCGCCAGAACTCT	TGG	0	+	105	no	-79	79	45	1218	1242	1709	1154	1571	1227	289	1334	1269	83	88	86	1148	1393	1200	81	86	157	503	873	1002	88	79	90	937	738	825	79	50	61	582	685	726	27	14	16	505
166	C2_03560C	C2_03560C	167	GGCACTATCACCAAGAGTTC	TGG	0	-	92	no	-66	66	50	1138	1041	1335	1076	1327	1070	213	774	556	35	81	75	655	882	803	49	47	79	308	427	520	60	26	55	605	458	352	15	19	31	422	553	431	64	35	39	284
167	C2_03560C	C2_03560C	168	CAAGAATAATGCTTGATTTC	TGG	0	-	37	no	-11	11	30	116	97	141	114	135	83	33	113	119	63	88	165	126	178	186	47	36	179	59	114	137	124	58	72	111	140	84	61	24	24	69	101	74	25			33
168	C2_04590C	QCR8	169	TTATTGGTCAGACTATATGC	AGG	0	-	163	no	-132	132	35					4	5				3			3		2		1	2	2	5			2	14		1	2
169	C2_04590C	QCR8	170	TCTCTCTCTCACTTTGGTGG	TGG	0	-	109	no	-78	78	50	5707	5882	7593	5557	7096	5709	1813	6546	6081	977	1272	1681	7120	9527	8100	5492	5531	8235	3162	5230	6224	4431	3124	3989	6506	5354	4935	1778	1449	1742	4333	5255	5039	73	57	62	3255
170	C2_04590C	QCR8	171	CTCTCTCTCTCTCACTTTGG	TGG	0	-	106	no	-75	75	50	2576	2557	3422	2447	3317	2598	728	2700	2333	306	304	288	2543	3348	3259	432	524	598	1117	1805	2241	251	101	214	2535	2021	1942	326	263	271	1701	1844	1742	352	211	271	1329
171	C2_04590C	QCR8	172	TCTCTCTCTCTCTCTCACTT	TGG	0	-	103	no	-72	72	45	4939	4494	5977	4620	5585	4577	1079	4026	3561	4174	4291	4415	4226	5050	4534	3605	3535	5832	1521	2672	3132	2390	1931	2044	3867	3046	3021	3033	2108	2787	2796	3753	2925	5310	3794	6380	1964
172	C2_04710C	URE2	173	GGAATTTGATATATTTATGG	AGG	0	-	262	no	182	182	25	11262	12951	17133	12003	15294	11526	5474	15802	16504	13022	15162	19947	17815	19873	18684	15433	17730	24882	7499	12136	14746	17665	11784	13778	14888	12546	12331	13324	10565	12942	12492	14210	12790	5387	3158	6683	8373
173	C2_04710C	URE2	174	ATGGGAATTTGATATATTTA	TGG	0	-	259	no	185	185	20	8451	9523	11912	8463	11108	8545	3518	11027	12398	11447	12741	16142	13311	15371	14443	12198	14050	19287	5396	8818	10593	11527	8030	8774	11621	9656	9321	12013	9967	12481	9573	10896	10513	13144	7857	18126	6478
174	C2_04710C	URE2	175	TGTGATAATTGATGGAATAA	TGG	0	-	240	no	204	204	25	4570	4636	5660	4352	5569	4247	1652	5365	5489	5915	6329	7802	6322	7266	7062	6662	7496	11523	2577	3842	4572	5957	4498	5178	5061	4479	4292	6532	5338	6573	4313	5552	4611	9004	5543	10354	2984
175	C2_04710C	URE2	176	TTATAATCTGTGATAATTGA	TGG	0	-	232	no	212	212	20	94	74	105	93	117	84	23	58	59	49	73	110	60	111	128	102	108	158	31	56	100	89	66	44	53	81	73	75	73	83	80	65	80	27	13	34	77
176	C2_04800C	MDM10	177	GTGGTTGATGTGGTTTGGTC	TGG	0	-	133	no	-11	11	50	880	665	1085	690	929	744	253	785	762	469	455	582	937	1195	1142	386	409	658	422	627	789	338	337	328	874	651	628	369	336	317	473	663	494	458	306	614	333
177	C2_04800C	MDM10	178	TAAAATGTTGATGGTTGATG	TGG	0	-	114	no	8	8	30	3274	3428	4348	3201	4168	3069	1151	3841	3771	3097	2777	3704	4628	5271	4932	3753	3890	6456	1909	2984	3633	4109	2974	3478	3709	3255	2785	3428	2808	3281	2965	3752	3142	2500	1640	3119	1802
178	C2_04800C	MDM10	179	TACATAATCACACTAATTAT	TGG	0	+	245	no	-123	123	20	1723	1762	2441	1232	1730	1314	473	1576	1732	342	395	402	1788	2107	1821	499	662	744	795	1383	1449	496	301	392	1365	1186	1036	471	277	382	777	1136	1056	61	19	33	801
179	C2_04800C	MDM10	180	ATTAGTGTGATTATGTAAGC	AGG	0	-	248	no	-126	126	30	822	713	1064	769	1019	903	333	1079	1172	1060	1117	1272	1256	1444	1173	1341	1465	2116	449	692	895	1114	934	1091	1154	704	854	1143	910	1225	759	1029	763	1348	1078	1970	519
180	C2_04810W	HIS3	183	TTATTCATTACATAACTTAT	AGG	0	+	36	no	40	40	15	331	334	394	290	442	342	168	432	436	508	553	662	535	610	433	638	696	942	203	325	398	547	365	427	379	387	323	657	352	507	389	396	339	140	109	219	213
181	C2_04810W	HIS3	184	TCGTTTGTGCTTTAACTTCT	TGG	0	+	259	no	-183	183	35	247	208	256	247	260	216	76	214	194	233	297	440	281	370	321	268	253	416	104	137	270	232	148	280	252	162	151	264	211	261	161	220	238	25	21	38	75
182	C2_05500W	ATP4	185	AGATACTAGATTTCCTATTT	AGG	0	-	170	no	-140	140	25	2259	2183	3062	2078	2664	2083	858	2211	2357	2390	2320	2990	2951	3618	2821	2559	2649	4049	1190	1954	2371	2377	1663	1844	2542	1925	2123	2486	1974	2498	2099	2269	2315	3940	2249	4346	1282
183	C2_05500W	ATP4	186	GAGCGAGAAACAAATATGAT	TGG	0	-	146	no	-116	116	35	1110	1157	1450	1080	1405	1024	325	1525	1206	1526	1664	1965	1480	1700	1532	1483	1579	2381	556	957	1169	1442	935	1197	1106	1008	887	1281	1062	1186	1125	1439	1174	1503	828	1598	675
184	C2_05500W	ATP4	187	TGTAAATGTGAAAGAAAGGG	AGG	0	+	79	no	-49	49	35	2555	2581	3089	2395	3108	2388	619	2008	1923	313	272	314	2633	3104	2942	438	509	721	1157	1685	2088	320	228	303	1978	1624	1730	313	250	286	1697	1990	1609	479	247	354	1227
185	C2_05500W	ATP4	188	GTAAATGTGAAAGAAAGGGA	GGG	0	+	78	no	-48	48	35	364	327	437	371	427	377	39	90	194		3	10	202	197	167	32	7	25	90	131	150	14	10	12	149	97	97	7	7	4	187	116	109			5	75
186	C2_06120C	C2_06120C	189	AATTTGGAACGCGTTTATTA	TGG	0	+	117	no	-105	105	30	194	179	254	201	274	162	81	128	197	100	158	205	308	234	268	152	233	402	69	140	208	179	133	158	183	190	184	203	183	195	99	98	116	28		21	86
187	C2_06120C	C2_06120C	190	AACGCGTTCCAAATTTGTTC	AGG	0	-	122	no	-110	110	40	421	378	503	375	450	396	110	437	387	504	520	727	419	608	570	572	602	895	184	426	328	474	332	405	448	333	320	506	387	544	425	358	430	301	136	244	290
188	C2_06120C	C2_06120C	191	CGTGTGTCTGTGCAGGCTGT	TGG	0	+	288	no	-276	276	60	8309	7381	10007	7194	9433	7285	2725	8984	8786	10051	10135	12068	10284	12287	11300	10098	10794	16766	3772	5966	7334	8725	6748	7774	8492	7158	6943	8586	6921	8630	6351	8087	6471	5646	2830	5750	4492
189	C2_06120C	C2_06120C	192	GTGTGTCTGTGCAGGCTGTT	GGG	0	+	287	no	-275	275	55	41	27	58	56	66	34	6	44	69	34	70	36	42	66	33	35	57	62	7	5	52	7	14	39	63	31	48	59	24	66	38	34	49	44	13	47	18
190	C2_06290C	ATP14	193	CACACACTTGAGTTGATTTG	TGG	0	+	117	no	-86	86	40	623	538	688	513	658	545	61	195	215		12	8	300	319	342	20	5	42	119	178	186	3	3	16	174	163	210	7	13	10	165	256	164	62	30	13	188
191	C2_06290C	ATP14	194	CACTTGAGTTGATTTGTGGA	AGG	0	+	113	no	-82	82	40					5	3
192	C2_06290C	ATP14	195	CTTGAGTTGATTTGTGGAAG	GGG	0	+	111	no	-80	80	40	775	678	1096	735	918	741	174	722	664	320	411	500	727	1110	1177	399	457	670	358	611	725	356	283	350	823	572	641	381	219	291	450	679	503	467	253	394	465
193	C2_06290C	ATP14	196	CAACTCAAGTGTGTGCGATT	CGG	0	-	122	no	-91	91	45		1				2
194	C2_07670C	GLE1	197	TTACGGAATAGAAAATGTAG	GGG	0	-	112	no	24	24	30	749	706	965	686	845	663	211	777	921	311	309	590	937	990	1113	363	405	629	369	556	592	234	180	166	845	658	617	273	199	241	523	501	537	388	289	468	336
195	C2_07670C	GLE1	198	TTGTATGATTCAGATACTAG	GGG	0	-	81	no	55	55	30	145	108	165	115	168	131	72	113	151	47	128	83	120	190	167	136	168	206	61	118	138	184	94	78	102	96	112	111	80	121	136	235	159				95
196	C2_07670C	GLE1	199	TAGTCTGTGATTCACCAAAT	TGG	0	+	256	no	-120	120	35	417	402	566	397	477	372	109	377	441	512	463	407	506	591	656	433	612	785	208	415	457	471	378	310	479	292	375	437	336	501	301	421	322	480	353	591	209
197	C2_07670C	GLE1	200	AACACTCATGAATGAGATAG	TGG	0	+	286	no	-150	150	35	467	445	602	488	551	422	161	657	437	223	301	442	533	899	826	527	574	960	309	419	493	531	419	572	419	517	467	543	403	429	532	515	551	64	65	135	299
198	C2_07680W	C2_07680W	201	GTTAACGTCGGTCTTTCTTC	TGG	0	-	156	no	-135	135	45	1751	1730	2128	1706	2146	1731	611	2211	2041	2647	2384	2939	2161	3109	2502	2426	2798	3985	890	1466	1474	1792	1450	1788	1656	1613	1365	2014	1658	1918	1624	1954	1296	2158	1440	2899	1119
199	C2_07680W	C2_07680W	202	TTCTCCCTCTCCATTCTGTT	TGG	0	+	84	no	-63	63	45	619	634	815	598	919	598	97	495	407	14	29	41	474	553	406	17	16	37	180	352	381	17	14	33	416	321	427	30	17	7	276	377	240	9	19	13	202
200	C2_07680W	C2_07680W	203	CTAACCAAACAGAATGGAGA	GGG	0	-	77	no	-56	56	40	230	176	320	201	220	171	12	87	9				31	53	50	2	8		21	59	32		3	6	40	25	27			3	26	23	45	5			23
201	C2_07680W	C2_07680W	204	TCTAACCAAACAGAATGGAG	AGG	0	-	76	no	-55	55	40	1903	1734	2144	1722	2055	1723	110	430	356	5			420	520	468	2	21	2	176	324	368	5	8	12	307	352	259		5	1	357	574	347	5			320
202	C2_09380W	RRP15	205	CGAGAGTCTAATTTCTTACG	CGG	0	-	106	no	-46	46	40	1264	1199	1454	1224	1407	1145	306	1249	1162	46	47	60	1162	1804	1593	306	390	621	531	1054	952	427	267	364	1337	872	725	217	115	207	783	831	771			9	536
203	C2_09380W	RRP15	206	TATGAAGAGACCATCCCTCT	AGG	0	+	62	no	-2	2	45	2840	2896	3670	2672	3551	2864	811	2962	2677	197	220	361	3472	4141	3625	1285	1490	2232	1278	1915	2264	1306	950	1094	2473	2207	2123	706	709	685	1602	1804	1746	106	38	101	1312
204	C2_09380W	RRP15	207	CATCCCTCTAGGTAAACCAC	TGG	0	+	51	no	9	9	50	978	909	1373	965	1136	1004	366	1104	926	231	313	298	1244	1729	1326	603	751	1003	554	708	838	584	420	593	1245	822	872	397	370	415	423	618	573	279	170	304	491
205	C2_09380W	RRP15	208	CAGTGGTTTACCTAGAGGGA	TGG	0	-	49	no	11	11	50	10	15	11	14	9	6		16	6	6			41	14	53	5	14	20	6	4	7	3			5	5	10			11		6	22				6
206	C2_09680W	C2_09680W	209	GACTTGGTTGCACACTCCGG	CGG	0	+	277	no	-184	184	60	3957	3572	4720	3467	4565	3440	1150	3985	3256	964	866	1290	4575	5559	5185	1712	1627	2971	1850	2816	3396	2177	1457	1939	3863	3060	2918	1920	1402	1833	1946	2513	2190	3358	1730	3708	1976
207	C2_09680W	C2_09680W	210	CAACCAAGTCCAAAGTGGGC	CGG	0	-	287	no	-194	194	55	46	57	56	76	78	74	34	35	76	67	75	97	91	91	84	79	89	85	28	70	31	51	32	82	51	71	105	56	48	34	54	79	51	49	15	25	47
208	C2_09680W	C2_09680W	211	GTGTGCAACCAAGTCCAAAG	TGG	0	-	282	no	-189	189	50					4	2
209	C2_09680W	C2_09680W	212	GAAGTATTTGGAAATACTAA	AGG	0	-	24	no	69	69	25	378	396	522	369	515	353	220	469	619	453	532	709	532	550	483	621	628	935	211	374	351	629	409	517	384	286	341	619	480	666	353	379	441	570	311	379	210
210	C2_09840W	MTW1	213	AACAGACCACCACAACTACT	TGG	0	+	40	no	8	8	45	4356	3875	5048	3855	4778	3935	1042	4317	4414	4227	4628	6049	4752	6527	5693	6380	6415	9875	1944	3294	4058	5152	4107	4974	4394	3779	3851	5886	4681	5711	3553	4339	4144	701	300	495	2642
211	C2_09840W	MTW1	214	GTTGTGGTGGTCTGTTGTTG	TGG	0	-	44	no	4	4	50	666	624	861	637	839	657	228	709	686	354	394	596	798	927	925	711	717	1029	257	400	456	651	421	521	746	562	504	550	381	507	487	587	693	34	4	7	301
212	C2_09840W	MTW1	215	GAATAGCCAAGTAGTTGTGG	TGG	0	-	31	no	17	17	45	38	30	37	53	50	21		11	30	6			47	70	76	38	37	44	16	49	25	21	25	36	48	31	22	21	17	23	53	30	39		5	3	27
213	C2_09840W	MTW1	216	TAAGAATAGCCAAGTAGTTG	TGG	0	-	28	no	20	20	35	9959	10312	13460	9929	12422	9782	3717	13353	12470	9452	9818	12706	14073	16500	14970	13837	14734	21058	5555	8867	10603	12415	9439	10375	11614	9922	9468	10655	8239	10313	9618	11537	9823	120	74	136	6562
214	C2_10280C	SPT23	217	AAAGTGGAAAGTGGTGGAGG	CGG	0	-	150	no	11	11	50	921	750	1180	809	1012	785	240	925	1131	47	31	17	1151	1380	1361	195	253	363	487	732	801	310	177	301	941	752	637	82	55	78	579	944	720	17	17		372
215	C2_10280C	SPT23	218	TGTGTGTAATAAGTGTGTGT	AGG	0	-	281	no	-120	120	35	2686	2277	3229	2347	3039	2361	646	2008	1930	960	1001	1171	2395	3156	2976	951	978	1347	1045	1555	2148	636	500	606	1984	1642	1504	772	636	663	1304	1497	1134	1586	776	1568	1045
216	C2_10280C	SPT23	219	TTGAGTAGGCGGGTGGTAGT	GGG	0	-	246	no	-85	85	55	2296	1852	2963	1536	2123	1622	405	1310	1256	3	1	20	1689	2092	1991	13	7	11	772	1334	1391	23	11	17	1339	1187	995	3		12	666	824	796				668
217	C2_10280C	SPT23	220	TTTGAGTAGGCGGGTGGTAG	TGG	0	-	245	no	-84	84	55	1893	1726	2385	1681	2205	1825	270	1001	944	406	426	569	1394	1542	1702	460	365	662	574	907	1136	312	121	209	977	901	806	233	202	264	551	989	707	388	230	679	560
218	C3_01080W	MRPL33	221	CGAAAGCTCAACGTTAAGGA	AGG	0	+	103	no	-27	27	45	4				2
219	C3_01080W	MRPL33	222	CAACGTTAAGGAAGGAAGGA	AGG	0	+	95	no	-19	19	45	796	725	1039	694	855	714	231	681	590	30	14	13	870	1201	849	313	251	317	333	460	664	148	104	192	685	561	534	70	51	24	405	483	378				347
220	C3_01080W	MRPL33	223	TCCCGGACAACACCCAAAAC	TGG	0	+	247	no	-171	171	55	1799	1729	2279	1516	2102	1563	337	1232	1007	28	50	37	1739	2323	1795	361	419	711	711	1050	1164	265	196	247	1269	1228	1165	243	254	255	815	1085	904	23	32	36	573
221	C3_01080W	MRPL33	224	GGTTTGCAAAAACACATTTA	CGG	0	+	226	no	-150	150	30	762	634	925	636	740	571	226	568	485	8	13	24	798	898	964	177	240	272	331	522	567	139	71	106	557	490	559	122	110	120	445	439	416	22	16	34	270
222	C3_01300C	NCE103	225	GGAAGGGATATAAACAATTT	AGG	0	-	103	no	242	242	30	2031	2046	2608	1845	2426	1925	828	2528	2179	2265	2594	3282	2772	3415	3197	2574	3215	4188	1111	1690	2164	2703	1686	2197	2307	1822	1923	2378	1984	2336	1848	2305	2197	3432	2148	3947	1308
223	C3_01300C	NCE103	226	TCTTGTACGACCAGTATCAG	TGG	0	+	60	no	285	285	45	493	420	624	433	552	402	130	457	464	529	525	717	563	730	635	560	683	1075	198	336	463	606	483	542	422	393	419	487	476	517	434	444	479	219	72	301	306
224	C3_01300C	NCE103	227	TGGCATCACCATCTCAATTG	AGG	0	+	40	no	305	305	45	4849	4593	5868	4025	5161	4045	1427	5104	4804	6060	6610	7538	5232	6429	6308	5629	6298	9788	2021	3216	3789	5013	3575	4569	4183	3645	3638	5320	4238	5074	3597	4580	4159	7661	4270	8595	2483
225	C3_01300C	NCE103	228	GATGGTGATGCCACTGATAC	TGG	0	-	47	no	298	298	50	3	6	33	6	15	11			5	12	20			5	12	7	12		2	7	7	1	9			1	2	13	6	16							7
226	C3_02370C	ALR1	229	GAACTAAGGACTGAGGACTG	AGG	0	-	181	no	362	362	50	169	148	256	116	211	173	35	138	183	176	206	188	188	249	249	201	186	328	69	118	106	158	141	215	105	109	83	151	133	165	119	120	69	230	198	247	75
227	C3_02370C	ALR1	230	ATATTAAGAACTAAGGACTG	AGG	0	-	174	no	369	369	30	3588	3887	5105	3506	4463	3431	1291	4954	4952	7795	8739	9869	5753	6289	5917	7754	8628	11423	2199	3285	4034	5588	4165	4494	4209	3707	3555	6668	5200	6393	4030	4577	4301	11481	8273	14640	2342
228	C3_02370C	ALR1	231	GGACTAGACTAGGAACAGGG	GGG	0	-	249	no	294	294	55	1610	1472	1941	1545	1816	1547	326	1944	1730	760	900	1064	2065	2374	2305	1677	1748	3156	844	1194	1504	1476	1240	1613	1610	1497	1251	1036	901	1030	1459	1757	1539	194	165	223	932
229	C3_02370C	ALR1	232	ATTGGACTAGACTAGGAACA	GGG	0	-	246	no	297	297	40	415	481	553	408	524	346	119	486	393	325	356	507	460	611	627	475	516	673	241	351	440	477	285	370	634	409	432	385	298	425	417	480	418	414	222	391	175
230	C3_02670W	C3_02670W	233	TTGCTTTCACAAAGATCACT	GGG	0	-	190	no	-172	172	35	197	204	226	180	243	208	55	233	345	252	330	338	383	365	308	384	285	580	106	194	285	309	226	304	236	189	158	366	241	390	216	282	163	27	45	82	122
231	C3_02670W	C3_02670W	234	GTTGCTTTCACAAAGATCAC	TGG	0	-	189	no	-171	171	40	76	68	107	46	70	76	72	72	62	91	73	164	41	120	123	157	178	170	47	99	96	113	99	103	70	38	70	115	84	83	38	82	45	36	16	53	62
232	C3_02670W	C3_02670W	235	CAACAGATGGTGATGGTTGT	AGG	0	+	88	no	-70	70	45	83	73	147	83	113	54	22	67	89	38	66	50	99	139	145	148	79	145	37	47	117	110	56	81	95	84	60	58	49	43	90	86	39	8			59
233	C3_02670W	C3_02670W	236	CACCATCTGTTGCAAAAAAT	AGG	0	-	96	no	-78	78	35	308	291	409	262	364	291	119	451	395	293	327	263	406	437	335	253	284	311	129	228	295	266	176	248	380	210	184	302	143	267	322	267	273	318	98	305	174
234	C3_04830C	FAS2	237	AATTTCTTGTAAGCTAATTG	AGG	0	+	290	no	-247	247	25	315	315	461	309	374	306	123	396	501	467	532	696	408	507	402	485	674	833	165	267	387	522	333	356	348	342	228	447	387	473	189	316	457	584	477	682	222
235	C3_04830C	FAS2	238	TAAGCTAATTGAGGGTGTTT	CGG	0	+	281	no	-238	238	35	2847	2612	3790	2596	3412	2554	1062	3472	3071	3065	3095	3926	3726	4426	3958	3489	3627	5525	1363	2254	2685	3242	2400	2915	2950	2403	2198	3298	2882	3605	2589	2886	2322	3641	2122	4334	1458
236	C3_04830C	FAS2	239	TCCAGCTTAGGGCATATTGT	TGG	0	+	153	no	-110	110	45	5127	4654	6351	4221	5367	4222	1363	5148	4705	3584	3637	4663	5505	6520	5569	3793	3902	5744	2157	3372	3866	3157	2573	2854	4065	3549	3408	3349	2741	3516	3108	3874	3383	3679	2284	4320	2334
237	C3_04830C	FAS2	240	ACCAACAATATGCCCTAAGC	TGG	0	-	149	no	-106	106	45	1385	1345	1921	1312	1750	1417	411	1621	1506	885	990	1195	1848	2322	1818	1172	1292	1856	712	1046	1198	1023	861	1176	1544	1459	1313	1127	1067	1189	841	971	955	452	235	364	704
238	C3_05800W	C3_05800W	241	CCAAAAAAACACGACTTGGA	AGG	0	+	132	no	-104	104	40	2406	2304	3129	2274	2837	2031	515	1891	1915	193	146	178	2652	3417	2955	573	633	832	1201	2017	2239	684	390	583	2141	1930	1834	358	310	292	999	1096	942	123	46	120	962
239	C3_05800W	C3_05800W	242	ACTAGTGTCTTGTACGTTAT	TGG	0	+	269	no	-241	241	35	431	404	560	390	532	377	113	535	488	636	616	754	594	735	591	612	644	1077	191	369	437	462	367	429	450	360	338	604	411	551	299	482	472	453	206	535	189
240	C3_05800W	C3_05800W	243	CAGTAAGACAAACCAAGCCA	AGG	0	+	16	no	12	12	45	1159	994	1521	740	1034	819	290	852	698	14	44	45	961	1223	1037	38	31	5	500	729	747	36	40	3	864	545	483	22	14	10	358	519	511	22	7	6	428
241	C3_05800W	C3_05800W	244	AGTAAGACAAACCAAGCCAA	GGG	0	+	15	no	13	13	40	14123	13089	16893	12856	16285	12489	4837	15920	16317	15114	16471	19817	18037	21279	20066	18728	21070	30730	7028	10732	13342	16387	12549	14800	15167	11953	11935	15731	12758	15094	11884	15409	12647	2572	1647	3202	7972
242	C3_05830W	KRE6	245	TAGCAACCCTTTATTATACT	TGG	0	+	73	no	132	132	30	3384	3550	4394	3279	4492	3239	1517	3916	4233	4555	4997	6257	4747	5538	4884	5093	5904	8417	1920	3102	3846	5204	3588	4138	3942	3077	3306	5378	3929	5726	3333	3575	3565	958	550	1064	2286
243	C3_05830W	KRE6	246	AATGTTGCCAAGTATAATAA	AGG	0	-	63	no	142	142	25	1064	1036	1315	995	1125	973	352	1112	1162	1260	1468	1683	1445	1746	1571	1573	1901	2719	635	951	1096	1781	1100	1312	1200	911	889	1702	1316	1669	888	1035	877	1404	883	1745	643
244	C3_05830W	KRE6	247	ATATATATATATATGAATGG	TGG	0	-	32	no	173	173	15	53	66	70	42	67	41	23	51	111	27	62	85	75	80	98	62	77	108	23	54	71	103	38	52	85	56	54	49	44	50	66	47	55	10	3	6	67
245	C3_05830W	KRE6	248	TATTCTATTCTATTCTATTA	AGG	0	+	200	no	5	5	15	721	976	1010	756	1050	839	356	953	1082	1004	1193	1666	1201	1525	1363	1246	1422	2051	548	800	934	1400	920	1114	1057	919	891	1509	1182	1291	1113	1179	1070	1985	1144	2402	682
246	C3_06520C	C3_06520C	249	AGGGGAGTAAAAGAGCATCG	TGG	0	+	190	no	-143	143	50	9486	9010	11951	9021	11317	8704	3292	11123	10392	6806	7630	10016	12056	13820	13386	11481	12288	18193	4704	7419	8808	9681	7749	8743	9947	8316	7791	10448	8061	10131	8078	10004	7955	10259	5845	13444	5224
247	C3_06520C	C3_06520C	250	GAAGAATGAGACGCGCGATG	TGG	0	+	158	no	-111	111	55	1234	971	1339	948	1146	997	281	1093	1186	34	70	61	1275	1591	1373	596	529	862	538	854	900	439	272	338	1056	834	782	345	257	257	594	790	720	10	2	12	512
248	C3_06520C	C3_06520C	251	AAGAATGAGACGCGCGATGT	GGG	0	+	157	no	-110	110	50	1215	883	1364	1035	1353	972	380	1419	1205	1111	1240	1605	1292	1530	1571	1070	1292	2141	514	861	1110	1241	844	1003	1085	931	849	1159	1003	1120	991	1282	1080	1321	1017	1746	606
249	C3_06520C	C3_06520C	252	TATGTTGAATTTACTTAACG	GGG	0	+	217	no	-170	170	25	545	562	798	539	709	575	217	675	850	833	776	1159	686	986	807	888	967	1504	313	455	665	922	657	727	547	567	627	884	717	681	574	702	581	1201	593	1443	394
250	C3_07320W	MDS3	253	ACAAAAAGTGAGGGCGTGAG	GGG	0	-	86	no	82	82	50	10910	10500	13480	9956	12724	9814	3683	13693	12770	6012	8908	8082	14906	17498	16293	6283	25861	32823	5850	9041	10591	11702	10071	7870	13103	11174	10396	2465	2028	2870	8730	11172	9776	776	558	1040	7351
251	C3_07320W	MDS3	254	AAACAAAAAGTGAGGGCGTG	AGG	0	-	84	no	84	84	45	672	669	803	665	867	691	247	822	600	707	773	991	879	1006	1132	913	938	1359	337	506	730	924	664	708	659	660	630	675	621	746	522	809	513	468	296	432	407
252	C3_07320W	MDS3	255	GATCTTAAGGCACAAGTTAT	TGG	0	+	49	no	119	119	35	1876	1864	2477	1816	2401	1759	728	2332	2202	2287	2689	3206	2513	2683	2892	2495	2652	4119	931	1674	1801	2091	1640	1816	2065	1859	1711	2126	1662	2353	1702	2225	1567	3451	1920	3252	1080
253	C3_07320W	MDS3	256	ATATAACCCACAAGTCTTAG	TGG	0	-	253	no	-85	85	35	395	503	637	439	598	470	193	510	451	98	147	126	469	419	424	256	259	397	186	282	367	191	169	203	523	331	273	187	133	213	232	237	257	80	9	37	203
254	C3_07390C	C3_07390C	257	TGGTAGGTTTGCAGTTGTTG	AGG	0	-	29	no	5	5	45	1453	1530	2209	1521	1966	1441	567	1510	1701	212	288	391	1722	2028	1929	435	299	476	764	958	1292	296	220	293	1212	1117	1195	156	102	154	738	1138	825	72	19	47	858
255	C3_07390C	C3_07390C	258	AGAAGGTTGGAGAGCAAGAT	CGG	0	-	255	no	-221	221	45	7082	6366	8989	6276	8048	6400	2583	8611	7835	8037	8161	9453	8709	10750	9544	8408	9644	13881	3403	5830	6515	7841	5765	6927	7500	6530	6241	7626	6174	7521	6237	8197	6704	9397	4985	9818	4265
256	C3_07390C	C3_07390C	259	GACGAGCTAAAGAAGAAGGT	TGG	0	-	242	no	-208	208	45	8315	7811	10499	7576	9899	7519	3018	9945	9504	9699	10369	13120	11177	14896	12663	12506	13357	20966	4515	7209	8281	11425	9036	10991	9920	8048	8098	10249	8476	9926	7364	9229	7328	4623	2711	5761	5145
257	C3_07390C	C3_07390C	260	TAAGTCACGTTTGTCCTTGC	TGG	0	+	215	no	-181	181	45	582	544	587	508	664	591	181	674	614	681	695	896	699	786	804	679	826	1274	270	377	444	606	570	507	646	466	359	549	571	587	448	675	409	960	499	972	295
258	C3_07780C	NUP159	261	GGACTGGTTCAAAATTAGTG	GGG	0	+	280	no	-261	261	40	4079	3862	5287	3729	4914	3822	1508	5103	4434	4863	4956	6096	5736	6551	6044	5716	6099	9063	2205	3689	4420	5831	4435	5528	4570	3798	3690	5256	4357	5356	3455	4279	4017	3517	2047	4231	2436
259	C3_07780C	NUP159	262	CTTCTTGTAGCCTCCCAACA	TGG	0	+	101	no	-82	82	50	4	3					5						4						1	1	4		1				1
260	C3_07780C	NUP159	263	GTGTGGTGCACGACCATGTT	GGG	0	-	85	no	-66	66	55			2
261	C3_07780C	NUP159	264	TGTGTGGTGCACGACCATGT	TGG	0	-	84	no	-65	65	55	1768	1504	2053	1621	1956	1680	499	2001	1693	1885	2108	2634	2002	2751	2312	2035	2380	3719	807	1303	1549	1692	1565	1772	1982	1379	1479	1651	1369	1457	1460	1820	1356	1313	796	1697	868
262	C4_00560C	MMM1	265	TAGTGCCAGAGATTTCACAG	TGG	0	+	89	no	-54	54	45	2145	2120	2984	2061	2665	2086	747	2647	2553	145	235	259	2809	3695	3084	936	1021	1670	1167	1951	2217	1036	658	974	2551	1911	2052	651	382	533	1793	2340	1992	37	11	76	1257
263	C4_00560C	MMM1	266	AGTGCCAGAGATTTCACAGT	GGG	0	+	88	no	-53	53	45	11021	10375	13223	10040	12878	10052	3557	12380	11096	2219	2043	2465	13294	16220	14636	4506	4434	7277	5177	8669	9608	4052	2687	3874	11408	9909	9039	3089	2358	2773	7349	9140	7576	2350	1078	2417	5397
264	C4_00560C	MMM1	267	TGCCAGAGATTTCACAGTGG	GGG	0	+	86	no	-51	51	50	1907	1781	2597	1725	2341	1725	423	1495	1526	1020	891	1286	2261	2610	2317	1219	1176	1889	857	1223	1682	727	663	741	1754	1491	1312	777	595	763	1160	1201	1153	1237	535	1387	672
265	C4_00560C	MMM1	268	CCAGAGATTTCACAGTGGGG	GGG	0	+	84	no	-49	49	55	1472	1347	1812	1348	1781	1322	257	1002	734				1431	1875	1713	34	18	36	520	836	1069	13	10	17	1162	833	862	24	24	27	759	941	962				587
266	C4_00890W	ARO1	269	CGATGAGCCATGACCAACAA	GGG	0	-	198	no	-177	177	50	627	651	783	627	814	717	322	693	624	731	726	854	777	911	1019	831	907	1477	329	568	525	700	576	613	755	672	607	504	451	545	528	616	502	13	3	75	362
267	C4_00890W	ARO1	270	ACGATGAGCCATGACCAACA	AGG	0	-	197	no	-176	176	50	1231	1232	1763	1136	1331	1130	408	1514	1271	69	41	82	1432	1861	1575	165	196	337	670	904	1227	228	122	154	1359	1144	1106	114	61	80	797	919	727	26		47	638
268	C4_00890W	ARO1	271	TTTCTCCATCAAACGGTGTT	TGG	0	+	168	no	-147	147	40	292	324	382	273	326	280	75	312	289	18	50	74	371	508	415	73	105	154	165	278	288	72	55	73	332	203	302	50	69	57	221	241	161	58	12	94	143
269	C4_00890W	ARO1	272	ACGGTGTTTGGTTTCTCGTT	TGG	0	+	156	no	-135	135	45	3363	3223	4111	3075	4063	3244	1289	4381	4206	602	662	998	4150	5558	4820	1638	1402	2123	1882	2729	3170	1276	859	1314	3757	2985	2956	1195	1026	1381	2249	2907	2573	2547	1223	2516	1901
270	C4_01150W	ASK1	273	GTGTGTTTAAGGGATGCTGG	TGG	0	+	280	no	-252	252	50	809	643	952	672	921	745	304	879	870	466	518	642	1057	1074	1113	679	968	1383	395	715	789	875	529	709	794	584	619	499	464	578	585	604	612	296	204	286	485
271	C4_01150W	ASK1	274	TGGTGGTAAATGGTTAGTGG	TGG	0	+	205	no	-177	177	45	2782	2624	3339	1994	2816	2167	282	911	950	20	23	23	2519	2579	2711	366	383	619	868	1398	1441	306	133	133	1941	1533	1426	314	234	340	658	1075	892	45	29	48	522
272	C4_01150W	ASK1	275	AAATGGTTAGTGGTGGTAAG	TGG	0	+	198	no	-170	170	40	350	329	481	261	365	230	10	62	76		2	16	240	313	318	91	44	41	87	140	165	15	11	14	210	186	153	69	49	39	38	100	109	28	21	141	47
273	C4_01150W	ASK1	276	TTAGTGGTGGTAAGTGGAGG	TGG	0	+	192	no	-164	164	50	80	88	115	97	77	61		11	5		13	11	45	74	61	13	4	23	13	40	29		5	8	31	21	31	6			49	39	29		8		23
274	C4_01750C	FBA1	277	GTAGGCAAGCAGGCAGAAAG	TGG	0	+	210	no	-153	153	55	223	180	237	124	247	150	29	107	159	5	6		256	316	251	222	295	440	95	153	230	136	109	92	261	161	191	230	136	162	157	208	190				70
275	C4_01750C	FBA1	278	TAGGCAAGCAGGCAGAAAGT	GGG	0	+	209	no	-152	152	50	2481	2503	3193	2159	2861	2052	762	2536	2343	493	479	536	3200	4167	3712	2794	3459	4980	1060	1734	2096	1851	1432	1998	3058	2491	2497	3064	2392	3045	1684	2259	1669	1231	615	1544	1259
276	C4_01750C	FBA1	279	TTCTGCCTGCTTGCCTACGT	GGG	0	-	212	no	-155	155	55	446	352	511	395	413	341	80	243	195		10	13	468	605	606	656	568	863	124	295	343	206	254	245	499	389	414	562	358	447	224	228	217	95	64	238	133
277	C4_01750C	FBA1	280	TTTCTGCCTGCTTGCCTACG	TGG	0	-	211	no	-154	154	55	337	344	325	278	307	275	96	293	285	23	46	16	375	464	461	361	384	621	126	177	296	250	172	217	279	203	243	393	285	364	232	258	206	122	60	185	91
278	C4_01870C	ERG8	281	CATTGGTATAATTGGTCTTG	GGG	0	-	271	no	-239	239	35	328	355	367	381	411	357	77	417	368	506	461	609	404	538	487	530	616	840	154	263	362	430	362	375	324	332	346	421	334	377	281	347	530	775	394	706	197
279	C4_01870C	ERG8	282	CCATTGGTATAATTGGTCTT	GGG	0	-	270	no	-238	238	35	336	306	462	353	463	374	89	416	428	448	459	713	547	427	439	415	539	703	154	318	379	406	347	293	399	326	366	339	354	506	312	349	275	569	320	654	263
280	C4_01870C	ERG8	283	TTACAAGAATGCAAGACCAT	TGG	0	-	254	no	-222	222	35	8051	7458	9812	7747	9798	7412	2998	10055	9310	17116	17565	18906	11313	12825	11879	14337	16087	23266	4228	6569	7831	9914	8006	9015	8780	7424	7210	12898	8998	12184	7652	9286	7940	22042	12760	25268	4833
281	C4_01870C	ERG8	284	ACAAGTTACACATATAGCTA	TGG	0	-	211	no	-179	179	30	1668	1783	2075	1648	2053	1578	674	1956	2181	1880	2420	2838	2499	2830	2758	2666	2894	4316	831	1524	1882	2403	1850	2288	1981	1551	1706	2486	1841	2439	1552	2015	1625	1386	876	1714	895
282	C4_01880W	TYR1	285	TTGGCGTGAAAAAAAAAACG	AGG	0	-	116	no	-68	68	35	828	862	1121	712	998	772	155	596	600	173	102	85	956	1190	1115	127	176	324	407	601	775	105	78	104	863	667	617	137	123	80	217	256	281	114	68	110	243
283	C4_01880W	TYR1	286	GGAAAAGCATTTCTTGCTGG	TGG	0	-	254	no	-206	206	45	202	220	260	275	308	222	55	309	254	228	293	410	218	382	503	320	280	478	119	183	243	377	257	314	233	213	156	204	218	198	185	229	158	90	77	241	209
284	C4_01880W	TYR1	287	CCTGGAAAAGCATTTCTTGC	TGG	0	-	251	no	-203	203	45	907	887	1315	986	1125	830	296	940	930	1216	1195	1398	1325	1403	1349	1264	1272	2168	425	780	804	1077	959	975	995	910	756	1176	936	1286	729	1096	918	1572	770	1827	490
285	C4_01880W	TYR1	288	TGACATTGCCAATTGATGAT	CGG	0	+	216	no	-168	168	35	2152	1956	2579	2046	2587	2101	791	2212	2235	2723	2824	3582	2445	3130	2927	2716	3186	4412	963	1635	1877	2362	1984	2159	2369	1710	1589	2411	1908	2308	1927	2285	1958	3022	1608	3244	1056
286	C4_01980C	CLC1	289	ATAAGTTTGTCGTGTGTTTG	AGG	0	-	153	no	-105	105	35	1710	1800	2224	1603	2069	1669	575	2198	2261	2216	2329	2612	2327	3175	2652	2284	2385	3772	872	1325	1617	1948	1546	1983	1930	1552	1521	2210	1826	2003	1703	1982	1911	2873	1711	3525	1197
287	C4_01980C	CLC1	290	ATCAAATACTGGGCAAGAGC	GGG	0	-	63	no	-15	15	45	9866	9546	12772	9271	11649	9177	2651	8307	7815	696	779	735	10429	12798	11378	1630	1937	2806	4357	7018	8011	2287	1525	2020	8611	7218	6872	1551	1146	1640	3913	4969	4370	656	398	752	4050
288	C4_01980C	CLC1	291	AATCAAATACTGGGCAAGAG	CGG	0	-	62	no	-14	14	40	3423	3609	4639	3373	4336	3268	1305	3836	3954	357	467	750	4546	5205	5211	1457	1565	1965	1945	3247	3521	1828	1189	1632	3954	3085	2898	1154	977	1387	2949	3617	2925	31	64	4	1926
289	C4_01980C	CLC1	292	TTACATCATTTCCTGTGGAG	TGG	0	-	217	no	-169	169	40	637	549	896	548	846	601	255	731	800	997	886	972	780	1047	892	832	1147	1410	348	554	607	885	870	941	688	686	587	1427	1077	1468	709	691	765	407	232	522	415
290	C4_03200C	C4_03200C	293	TATGTCCGTATCAATCTACG	TGG	0	-	275	no	-217	217	40	580	518	659	560	700	559	225	621	758	973	972	1001	1019	952	767	989	1206	1542	274	417	508	715	639	813	610	546	495	835	892	906	461	709	640	986	449	978	329
291	C4_03200C	C4_03200C	294	TCATACCACGTAGATTGATA	CGG	0	+	283	no	-225	225	35	205	211	272	235	221	208	78	210	119	401	345	373	262	334	313	265	403	718	116	141	229	276	190	212	266	184	140	273	233	287	204	296	208	245	197	289	163
292	C4_03200C	C4_03200C	295	TCCGGAATGTCACAGGTAAT	CGG	0	-	225	no	-167	167	45	7428	6965	9641	6733	9134	6797	2539	8610	7904	8272	8978	10940	9817	12145	10842	9729	10737	15421	3833	6073	7470	8944	6922	7900	8125	6609	7047	9463	7477	8999	6771	8654	7216	11544	7050	13392	4976
293	C4_03200C	C4_03200C	296	AGTAAACTCCGGAATGTCAC	AGG	0	-	218	no	-160	160	45	4463	4019	5629	4147	5536	4235	1465	5318	4883	5056	5863	7173	5875	6826	6131	6395	6792	10082	2325	3660	4398	5736	4370	5101	5173	3904	3981	6037	5161	5660	4400	5075	4235	8839	5137	8808	2628
294	C4_03330W	IPK1	297	GTGAAGATCAGGCCCTTCCT	TGG	0	+	103	no	146	146	55	2477	2396	2877	2468	3030	2409	928	3274	2760	3650	3897	4794	3194	4178	3899	4104	3855	6507	1377	2191	2588	3116	2469	2958	3023	2687	2566	3366	2937	3840	2457	3123	2246	5846	3338	6124	1527
295	C4_03330W	IPK1	298	GGCAAGATATAACCAAGGAA	GGG	0	-	88	no	161	161	40	4581	4485	6010	4152	5275	4371	1738	5305	5453	2692	2966	3405	5889	7193	6334	3998	3869	6196	2322	3796	4186	4236	2727	3441	4652	3827	3934	2747	2427	2760	2937	3656	2986	372	236	474	2602
296	C4_03330W	IPK1	299	GGGCAAGATATAACCAAGGA	AGG	0	-	87	no	162	162	45	4425	4288	5963	4337	5330	4325	1579	5686	5427	2168	2576	2949	6048	7892	6779	4373	4541	7052	2300	3802	4625	3738	2810	3317	5181	4418	4518	2791	1966	2425	3543	4346	3975	519	337	492	2700
297	C4_03330W	IPK1	300	TTTAGGGCAAGATATAACCA	AGG	0	-	83	no	166	166	35	1144	1134	1564	1180	1353	1125	405	1343	1255	682	785	882	1662	2096	1767	1126	1245	1736	619	973	1138	1041	763	900	1283	1135	1164	802	553	970	829	1033	833	31	8	20	632
298	C4_04260C	FZO1	301	CAAATAGTGTATCCGCAAAT	TGG	0	-	199	no	-66	66	35	669	618	813	677	733	603	166	909	870	1000	1169	1262	907	1132	895	849	1090	1658	353	682	771	752	589	742	784	612	591	778	602	833	613	832	611	1525	790	1550	340
299	C4_04260C	FZO1	302	ACTGATCACGTGAAAATTCG	GGG	0	+	274	no	-141	141	40	838	789	1037	807	889	709	214	1036	916	1068	1021	1361	1104	1309	1202	1317	1372	2058	405	774	877	1182	856	984	885	733	777	1249	1011	1157	818	917	868	1310	859	1443	502
300	C4_04260C	FZO1	303	ACGTCTTTCGATAGTGGCAC	TGG	0	-	127	no	6	6	50	546	436	612	448	546	412	145	531	550	65	99	78	527	666	595	181	189	329	175	307	544	167	126	158	584	308	372	127	104	180	305	408	342	7	26	23	254
301	C4_04260C	FZO1	304	TTGAATACGTCTTTCGATAG	TGG	0	-	121	no	12	12	35	450	515	672	462	587	466	186	646	463	297	375	411	738	663	644	531	533	819	233	347	438	504	370	442	478	561	409	378	241	360	472	465	572	70	101	167	294
302	C4_04820C	C4_04820C	305	CATAGTGCGAACAATACTAT	AGG	0	-	191	no	-112	112	35	6	3	14	5	3	12	5	32	111	17	17	118	140	221	217	101	80	163	28	61	105	194	34	63	153	123	118	74	66	143	65	57	56	78	27	83	59
303	C4_04820C	C4_04820C	306	TGAAAACTCAATGTTGATAT	TGG	0	-	153	no	-74	74	25	1734	1768	2140	1730	1960	1590	661	2062	1813	2049	2211	2696	2355	2697	2364	2689	2871	4172	1015	1436	1840	2227	1657	1929	1771	1678	1559	2532	1867	2274	1661	1781	1540	2724	1607	2920	940
304	C4_04820C	C4_04820C	307	TGGAATATTTGGGTGCGGGA	AGG	0	+	58	no	21	21	50	5168	5218	6576	5023	6454	4785	2100	6602	6495	5613	6297	7621	7098	8745	7890	8032	9008	13491	2797	4450	5299	7236	5181	6504	5762	5022	4952	6855	5787	7022	4329	4727	4950	1235	869	1625	3131
305	C4_04820C	C4_04820C	308	CTATAGTATTGTTCGCACTA	TGG	0	+	193	no	-114	114	35	44	37	43	45	46	32	23	54	40	26	46	41	74	29	49	64	31	127	11	51	31	38	42	53	81	15	40	71	29	58	25	42	34	38		35	31
306	C5_00770C	FOL1	309	AATTTGATGCTACCACTACG	AGG	0	+	273	no	-133	133	40	314	255	304	273	336	281	96	339	219	141	85	164	312	414	396	324	317	500	146	227	261	283	217	254	312	267	261	249	207	289	202	217	228	130	147	279	211
307	C5_00770C	FOL1	310	TTGGAGGAAAAGTGGGGCGG	AGG	0	-	117	no	23	23	60	573	585	892	655	742	594	222	729	681	906	929	1010	685	921	862	906	1221	1382	321	508	707	917	680	701	846	696	710	825	630	745	597	635	536	1394	628	1456	378
308	C5_00770C	FOL1	311	TAATTGGAGGAAAAGTGGGG	CGG	0	-	114	no	26	26	45	325	369	360	284	362	308	106	346	402	2		7	411	594	409	55	47	77	155	293	317	49	34	57	450	264	300	12	18	35	303	342	242		1	23	221
309	C5_00770C	FOL1	312	GGTATTAAATTGGTTCCAAG	AGG	0	+	252	no	-112	112	35	7827	8154	10822	7782	9818	7755	3043	9459	9917	1765	2321	2814	11496	13547	13346	9173	9658	14731	4551	7512	8938	8139	5587	6627	10163	8474	8410	5089	4625	5317	7886	9257	8533	164	115	270	5644
310	C5_00790C	C5_00790C	313	CCATCCCCCAAAAGAGTAAA	AGG	0	+	279	no	339	339	45	12549	12754	16602	12279	15841	12121	4529	15265	14849	15727	17412	22031	17681	20638	19158	19713	22364	32559	7029	11464	13933	17699	13281	16042	13957	11613	11761	18363	13984	18465	11615	14817	12645	15933	9179	18930	7538
311	C5_00790C	C5_00790C	314	AAAGTTACCAACCAGTAAAT	TGG	0	+	245	no	373	373	30	134	91	163	117	119	77	23	188	128	153	110	117	202	225	151	240	175	214	39	134	139	196	136	127	169	87	143	157	97	116	105	147	91	171	72	99	63
312	C5_00790C	C5_00790C	315	CGATGGAACTACCAATTTAC	TGG	0	-	231	no	387	387	40	1		3			8									1					2
313	C5_00790C	C5_00790C	316	TAGTAGTTTGGATTTGACGA	TGG	0	-	214	no	404	404	35	4004	3956	4879	3718	4834	3777	1643	4794	4706	4980	5426	6719	5925	6216	6276	5662	6449	9381	2097	3720	4202	5307	4006	4844	4469	3795	3600	5382	4423	5572	4082	4832	4158	6705	3968	8323	2660
314	C5_01240W	AUR1	317	AATGTAGCGGGGAAGAGGAG	AGG	0	-	249	no	104	104	55	4626	4034	5550	4251	5148	3896	1302	4589	4162	338	354	418	5027	6460	5486	1170	1294	1858	1970	3469	3867	660	434	665	4548	3808	3314	607	451	625	2601	3451	2664	379	153	459	2360
315	C5_01240W	AUR1	318	GTTCTAATGTAGCGGGGAAG	AGG	0	-	244	no	109	109	50	686	660	933	646	920	696	311	657	761	613	660	861	977	958	1018	922	1002	1478	330	572	597	856	580	803	762	585	706	652	466	704	759	701	675	79	73	64	330
316	C5_01240W	AUR1	319	ATGGTGGTTCTAATGTAGCG	GGG	0	-	238	no	115	115	45	764	757	820	658	832	668	264	1011	951	965	1003	1207	851	1265	981	1188	1146	1740	347	634	730	953	681	861	830	669	615	1079	914	1209	541	878	600	1169	695	1267	459
317	C5_01240W	AUR1	320	AATGGTGGTTCTAATGTAGC	GGG	0	-	237	no	116	116	40	528	495	680	439	624	447	170	508	521	726	659	834	694	769	729	672	738	1126	252	374	403	500	499	467	506	402	516	623	510	630	394	750	555	989	543	887	268
318	C5_01460W	YBL053	321	CAACGCGTTGTTTATTTCTG	TGG	0	+	74	no	23	23	40	150	109	154	62	138	71	40	83	89	52	125	150	245	192	87	107	119	168	76	98	97	124	83	93	136	72	115	122	89	139	113	100	106	9	15	44	45
319	C5_01460W	YBL053	322	ACAATGCTAGGATATGATGA	TGG	0	-	15	no	82	82	35	735	739	945	680	941	641	257	952	951	459	469	555	1104	1318	1072	1091	1234	1980	394	603	780	871	590	791	802	599	582	1084	809	1057	479	772	507	4	12	13	368
320	C5_01460W	YBL053	323	GAATTCTCAGGCTGGTCCAT	AGG	0	-	253	no	-156	156	50	383	343	534	397	464	305	115	435	365	425	470	511	494	590	573	493	677	935	183	384	406	508	381	369	396	387	415	611	396	478	325	384	503	692	344	740	208
321	C5_01460W	YBL053	324	TGTCTAAGGAATTCTCAGGC	TGG	0	-	245	no	-148	148	45	2949	2805	3875	2792	3513	2870	945	3553	3501	4617	4883	5606	3986	5001	4494	4948	5099	8248	1486	2816	3136	3840	2869	3790	3303	2962	2754	4484	3681	4528	2722	3824	2853	6282	3895	6975	1950
322	C5_01720C	RCY1	325	GTTGATTGATGACTGATGGT	GGG	0	-	186	no	31	31	40	640	552	804	584	749	556	187	866	731	702	709	1067	793	965	648	839	815	1277	350	524	605	698	510	651	605	556	523	862	651	779	576	795	507	1019	620	903	369
323	C5_01720C	RCY1	326	AGTTGATTGATGACTGATGG	TGG	0	-	185	no	32	32	40	5597	5448	6918	5330	6637	5312	2004	6866	6891	7468	7834	9857	7359	9023	8372	7632	8246	13127	3058	4859	5750	8933	6354	7959	6413	5303	5195	4924	4150	4870	5446	6220	5951	1116	596	1193	3622
324	C5_01720C	RCY1	327	GATAGTTGATTGATGACTGA	TGG	0	-	182	no	35	35	35	554	624	867	646	825	627	280	819	802	798	811	1095	828	1022	1092	959	1006	1580	347	537	644	711	744	746	633	585	608	705	668	917	631	715	517	1113	906	1486	341
325	C5_01720C	RCY1	328	AAAGTAATATCTTAACGCAA	TGG	0	-	158	no	59	59	25	816	808	1073	758	1015	733	230	898	1029	995	1109	1601	1344	1145	1157	1037	1258	1899	397	752	959	1093	763	849	843	805	846	1160	923	1274	851	927	770	1331	942	1836	500
326	C5_02900W	SPT8	329	ATTCTCTGGCTTGCTGGCTT	TGG	0	-	146	no	-121	121	50	387	379	476	387	479	351	145	467	240	549	598	771	493	565	494	453	556	883	152	285	352	388	297	326	399	405	303	488	446	494	335	343	337	26	17	94	218
327	C5_02900W	SPT8	330	TCAACAATTCTCTGGCTTGC	TGG	0	-	140	no	-115	115	45	3572	3338	4613	2759	3759	2749	758	3282	3142	2484	2471	2803	3613	4545	3870	2738	2894	4284	1567	2541	2846	2190	1550	1996	2909	2535	2239	2430	1937	2346	2013	2567	2375	3356	1792	3254	1396
328	C5_02900W	SPT8	331	TTTGGGTGTCGCAGAATCAA	CGG	0	+	101	no	-76	76	45	1993	2137	2587	2069	2461	2052	750	2304	2606	3382	3499	4799	2674	3271	3429	2650	2774	4279	1003	1730	1939	2295	1704	2035	2246	1950	2225	2372	2047	2338	2024	2619	2099	4968	2335	5278	1221
329	C5_02900W	SPT8	332	TTAATCCAACTACAAAATGT	TGG	0	+	202	no	-177	177	25	1626	1626	2263	1589	2018	1481	556	2018	2050	2142	2073	2519	2118	2478	2377	2125	2302	3479	836	1328	1650	1969	1461	1648	1856	1371	1369	2107	1704	1930	1572	1721	1650	1288	710	1342	1085
330	C5_05190W	PCL5	333	TTAGGAGCGGGAGTGGGAGC	AGG	0	-	31	no	132	132	65	7704	6551	9198	6823	9023	6810	2421	8520	8364	9259	9285	11281	9243	11001	10053	8787	9210	14048	3619	5842	6739	7397	5999	7108	7465	6313	6022	7792	6012	7467	6479	7724	7062	9590	5559	10865	4228
331	C5_05190W	PCL5	334	AAACAGTTAGGAGCGGGAGT	GGG	0	-	25	no	138	138	50	1039	1114	1474	1144	1312	1108	271	1146	1216	1243	1155	1634	1370	1705	1547	1191	1162	1762	486	774	915	887	707	778	1170	961	870	711	636	838	840	1005	700	152	96	170	628
332	C5_05190W	PCL5	335	AAAACAGTTAGGAGCGGGAG	TGG	0	-	24	no	139	139	50	591	459	675	445	613	518	231	623	507	272	588	389	469	627	695	290	1631	2158	255	408	496	785	683	470	633	498	545	305	192	338	452	488	409	25	16	15	303
333	C5_05190W	PCL5	336	AGAAGGAAAACAGTTAGGAG	CGG	0	-	18	no	145	145	40	9961	9626	12455	9212	11979	9518	3499	12246	11611	10901	11492	15116	13263	15895	15219	14608	15599	23225	5652	8489	10208	14267	10063	12768	11810	9596	9502	13007	10867	12910	9595	11651	9813	2273	1110	2925	6783
334	C5_05410C	ILV3	337	TGTGGATGGGTACATGATCT	GGG	0	-	208	no	-205	205	45	6994	6308	8486	6152	8009	6245	2734	7829	7347	8245	9176	10149	8871	10671	9420	9814	9975	15102	3333	5180	6128	7622	6309	7299	7710	5929	5770	8658	6966	8495	5853	7512	6712	12327	7031	12578	3870
335	C5_05410C	ILV3	338	TGGCTGGATCCAGTCAATCC	AGG	0	-	259	no	-256	256	55	263	211	294	255	276	229	120	290	169	342	346	479	352	368	376	380	371	644	170	245	228	299	241	293	235	188	191	303	339	323	199	248	227	470	171	428	132
336	C5_05410C	ILV3	339	ACAAGGAACCGGATTTCCCT	TGG	0	-	239	no	-236	236	50	386	307	418	359	376	355	90	414	454	478	462	498	504	506	522	565	517	737	176	261	369	390	321	380	401	421	295	472	345	519	329	470	421	498	421	820	232
337	C5_05410C	ILV3	340	GGATGGGTACATGATCTGGG	TGG	0	-	211	no	-208	208	55	2630	2519	3234	2405	3306	2546	875	3006	3166	29	25	12	3392	4265	4130	446	434	606	1269	2157	2652	393	310	413	2516	2432	2118	111	76	115	1747	2293	1948	8	2	33	1202
338	C6_00870C	ILV5	341	GCTGTCCCACTCAACTGAGG	TGG	0	-	166	no	-114	114	60	2001	1984	2512	1410	2019	1412	497	2138	1932	7	11	14	2547	3431	2932	110	223	423	1164	1848	2095	315	244	250	3025	2593	1912	57	42	96	1200	1642	1334				807
339	C6_00870C	ILV5	342	TTTGCTGTCCCACTCAACTG	AGG	0	-	163	no	-111	111	50	837	814	951	746	975	736	303	894	994	810	826	1191	916	1278	1302	1131	1288	1875	301	621	735	939	733	841	846	897	660	931	698	867	485	763	722	7	4		395
340	C6_00870C	ILV5	343	AATCTGCGCTATTCCGCTAC	AGG	0	+	260	no	-208	208	50		5			1
341	C6_00870C	ILV5	344	GCGCGATGCAGGCCCTGTAG	CGG	0	-	244	no	-192	192	70	604	556	572	522	706	545	231	529	702	288	432	485	804	926	1035	542	631	857	253	537	580	393	398	488	505	491	484	389	344	460	629	682	634	66	47	29	318
342	C6_01280W	EXO84	345	AATTTAGTGTTGTTACCGTT	CGG	0	-	197	no	-138	138	30	270	298	468	302	388	330	164	452	473	417	410	689	392	528	545	462	682	886	169	311	326	383	236	414	271	304	333	521	411	433	291	399	326	202	136	319	270
343	C6_01280W	EXO84	346	TTGATAACTCGTGCACGACA	TGG	0	-	127	no	-68	68	45	144	115	168	139	187	172	86	199	160	133	243	274	207	321	279	219	205	298	69	134	151	176	166	153	149	145	163	182	122	134	105	212	139	28	22	50	103
344	C6_01280W	EXO84	347	ATAGTGTAAAGCGTTCTCAT	TGG	0	+	245	no	-186	186	35	288	252	397	258	323	222	66	309	278	247	321	372	319	397	303	390	388	653	136	242	303	283	245	301	221	241	275	381	290	319	244	210	240	291	316	350	123
345	C6_01280W	EXO84	348	ATGAGAACGCTTTACACTAT	TGG	0	-	245	no	-186	186	35	131	127	193	100	135	155	70	95	142	178	126	162	195	212	222	272	182	281	59	164	88	135	115	168	119	98	155	196	183	119	77	102	97	78	12	116	65
346	C6_01980C	C6_01980C	349	TGTTTGATATTCTTGATTCC	TGG	0	-	84	no	-14	14	30	1325	1302	1862	1310	1677	1296	535	1431	1633	855	831	1001	1675	2124	1766	859	874	1202	635	1117	1300	730	619	771	1275	1154	939	355	277	402	672	889	944	83	57	86	766
347	C6_01980C	C6_01980C	350	ATCACGGCCAAGACAAGCCA	CGG	0	+	242	yes	-172	172	55	7430	6612	8918	6963	8646	6802	2388	9243	8021	13743	13494	14704	9449	11075	10377	11861	13045	19683	3395	5655	6366	8684	6897	7738	7480	6565	6179	10903	7947	10053	5977	7950	6435	16495	9384	17747	4037
348	C6_01980C	C6_01980C	351	TGCCATACCGTGGCTTGTCT	TGG	0	-	232	no	-162	162	55	7574	7075	8809	6853	8635	6969	2126	8190	7199	8996	9183	11018	8672	10164	9925	8926	9330	14720	3153	5061	6375	7199	6038	7097	6720	5938	5676	7983	6562	8080	6089	8397	7007	12623	7299	14653	3754
349	C6_01980C	C6_01980C	352	CTAAAAGCGTTGCCATACCG	TGG	0	-	222	no	-152	152	50	203	233	350	217	333	190	52	293	258	422	345	521	307	395	335	473	378	517	131	201	281	379	252	293	284	218	287	346	283	349	202	364	258	361	360	540	178
350	C6_02370C	C6_02370C	353	AAAAAATTTTTTTTCATATT	GGG	0	+	150	no	-120	120	5	2637	3387	4429	2984	3754	2767	1479	4086	5017	3501	3956	6110	4840	5491	5472	4592	5340	6769	2068	3641	4080	5644	3355	4126	4448	3643	3707	4813	3975	4898	4232	3914	4444	7646	5523	11368	3001
351	C6_02370C	C6_02370C	354	CATATTGGGTCGTGCATTAT	TGG	0	+	136	no	-106	106	40	250	224	357	275	323	210	103	208	282	266	281	448	385	380	283	268	310	522	125	196	231	262	220	365	328	204	285	265	273	267	298	212	237	453	232	378	187
352	C6_02370C	C6_02370C	355	ATATTTATTCGTGAAGGTTG	CGG	0	-	18	no	12	12	30	936	990	1192	881	1093	823	381	1199	1152	1304	1400	1715	1402	1649	1318	1740	1633	2309	533	882	1084	1432	982	1165	1015	914	969	1346	1046	1295	1007	1188	1198	1879	986	2159	574
353	C6_02370C	C6_02370C	356	GGATGAATATTTATTCGTGA	AGG	0	-	12	no	18	18	30	172	161	197	156	184	133	50	130	129	276	202	214	177	248	203	206	276	313	72	119	128	169	137	173	171	171	136	230	157	189	151	253	74	63	53	114	99
354	C6_02570C	SEC20	357	TGTCTCTAGTCAGGATCAAC	TGG	0	-	94	no	-78	78	45	122	71	158	93	124	87	26	141	171	19	13	27	120	133	120	60	54	42	62	69	46	74	28	42	84	96	67	20	18	28	30	48	54				43
355	C6_02570C	SEC20	358	TTTGTTCGGTGTCTCTAGTC	AGG	0	-	85	no	-69	69	45	178	219	269	211	236	198	101	205	301	277	239	398	296	278	258	247	350	496	124	164	234	212	232	238	240	170	201	252	168	315	185	223	260	255	132	351	166
356	C6_02570C	SEC20	359	TATAGCTAATACTTCGAAAC	CGG	0	-	272	no	-256	256	30	900	750	1124	827	1041	772	286	1211	1140	938	970	1330	1165	1435	1221	1475	1393	1961	447	787	885	1230	773	1030	1062	799	838	1239	951	1145	754	1155	811	1096	565	1444	480
357	C6_02570C	SEC20	360	AGTAATTTGTCTAATGGGGC	TGG	0	-	246	no	-230	230	40	2215	2438	3150	2206	2850	2201	858	2876	2781	3189	3563	3689	3342	3946	3429	3547	3941	5621	1231	2110	2513	3304	2335	2631	2892	2347	2439	3473	2542	3347	2473	2588	2510	4368	2095	4974	1487
358	C6_03110C	C6_03110C	361	GGCTGCATTCAAACGTTCTT	TGG	0	+	279	no			45	1407	1286	1756	1306	1559	1296	482	1700	1428	1389	1681	1953	1595	1907	2011	1418	1544	2439	713	1024	1201	1215	924	1120	1310	1426	1221	1027	838	974	991	1430	1090	97	75	101	870
359	C6_03110C	C6_03110C	362	GATCTCTCAGGACTGCCATA	TGG	0	+	229	no			50	908	843	1134	871	1160	847	217	959	938	1080	1183	1374	1178	1499	1456	1150	1309	2119	390	751	871	1248	803	1032	941	847	689	894	937	1022	774	946	810	1296	612	1569	546
360	C6_03110C	C6_03110C	363	GGACTGCCATATGGTCTATA	AGG	0	+	220	no			45	371	410	515	431	521	366	162	432	403	654	807	812	512	752	598	684	886	1238	251	344	412	465	457	478	480	450	385	495	583	496	392	481	330	747	488	711	244
361	C6_03110C	C6_03110C	364	GACTGCCATATGGTCTATAA	GGG	0	+	219	no			40	145	186	187	153	232	141	28	177	145	183	177	170	272	327	259	196	222	312	87	136	214	328	187	303	156	185	172	330	190	326	105	144	209	178	145	121	76
362	C6_04120C	C6_04120C	365	GAATTGATACATTATACTAT	CGG	0	+	163	no	47	47	20	59	57	86	66	65	64	20	78	40	99	127	109	101	82	93	96	172	172	35	60	98	101	102	52	79	67	69	113	82	129	85	123	57	123	97	92	23
363	C6_04120C	C6_04120C	366	TAGCATTACATCACACTAAA	AGG	0	+	285	no	-75	75	30	2999	2879	3995	2696	3338	2831	1166	3472	3594	3351	3702	4214	3906	4809	4123	3922	4397	6589	1457	2583	3050	3664	2634	3228	3335	2805	2904	4072	3145	3795	2757	3391	3055	3777	2038	3777	1839
364	C6_04120C	C6_04120C	367	TTGTTGTTTGTGGTTGTCTG	TGG	0	-	224	yes	-14	14	40	318	331	462	331	448	354	74	436	365	420	414	676	415	409	475	323	381	633	167	247	267	409	334	306	407	324	246	397	341	362	275	378	280	543	404	590	204
365	C6_04120C	C6_04120C	368	GTTGTTGTTGTTGTTGTTTG	TGG	0	-	214	no	-4	4	35	2075	1792	2374	1888	2442	1795	750	2072	2207	1493	1519	2346	2547	3158	2582	1315	1565	2312	996	1500	1923	1520	1157	1505	1926	1691	1835	677	547	662	1382	1567	1401	244	97	349	1103
366	C7_00210C	C7_00210C	369	GGACTGGATTTAAACATGGT	TGG	0	+	92	no	-85	85	40	467	434	554	465	633	452	98	525	341	13	12	27	621	702	660	158	179	233	280	318	550	98	70	102	494	534	448	142	100	150	341	374	369	61	28	117	246
367	C7_00210C	C7_00210C	370	TCTCATCCCCGGACTTAACT	TGG	0	+	271	no	-264	264	50	2270	2235	2823	2214	2883	2214	682	2609	2471	3207	3308	3952	3002	3543	3165	3879	3687	5734	1089	1724	2067	2884	2176	2775	2617	1983	1909	3236	2588	3230	1908	2512	2293	2211	1022	2083	1431
368	C7_00210C	C7_00210C	371	CTTTCTTGGCAGGCTCGTAG	GGG	0	+	214	no	-207	207	55	568	521	675	541	571	471	210	747	785	731	783	1096	862	988	910	1107	1016	1597	284	460	520	650	531	733	622	439	365	608	602	668	517	765	528	49	69	55	249
369	C7_00210C	C7_00210C	372	CTACGAGCCTGCCAAGAAAG	TGG	0	-	214	no	-207	207	55	52	48	60	34	56	47	24	77		26	37	99	41	51	58	48	28	104	30	47	52	52	59	60	57	31	29	20	32	38	18	59	32				17
370	C7_00730W	MET28	373	CTCTCTCTCTCTTCTTATTT	CGG	0	+	169	no	-97	97	35	364	488	563	439	536	437	151	574	665	540	697	740	653	790	722	636	714	1068	233	373	455	465	403	477	612	458	413	600	440	546	349	557	518	776	367	572	323
371	C7_00730W	MET28	374	TCTCTCTCTCTTCTTATTTC	GGG	0	+	168	no	-96	96	35	2328	2199	2801	2114	2609	2013	568	1688	1775	1135	1115	1405	1787	2165	1743	1460	1742	2209	835	1207	1367	1302	1012	1077	1186	1065	998	1087	704	965	1226	1374	1134	1529	796	1568	807
372	C7_00730W	MET28	375	TAAGCGAATAAAGGGAAGAA	AGG	0	-	78	no	-6	6	35	11215	11080	14535	10989	13701	10654	4099	13309	14472	7811	8334	10550	17800	22775	19319	19241	20638	32555	8627	13820	16177	22391	16077	19015	15520	12934	12475	18025	13944	17651	10849	13197	11008	7026	3417	7230	7150
373	C7_00730W	MET28	376	GAATAAGAACTAATTGGTAA	AGG	0	-	34	no	38	38	25	4933	5000	6555	4517	5996	4348	1908	5752	6017	2821	2965	4072	6508	7505	6698	3399	3606	5516	2806	4496	5321	4268	3060	3465	6115	4959	4657	2675	2113	2364	3278	3931	3676	425	178	463	2913
374	C7_01180W	MDM12	377	ACTCAGCTAGTTCTGCTTGT	TGG	0	+	179	no	-126	126	45	122	86	135	101	123	115	29	114	157	160	157	190	140	148	133	169	168	341	82	102	115	84	103	138	94	130	70	143	107	157	90	87	146	74	69	154	34
375	C7_01180W	MDM12	378	CTAGTTCTGCTTGTTGGTAC	TGG	0	+	173	no	-120	120	45	184	169	260	168	199	152	69	239	168	211	233	285	138	235	300	286	320	498	74	145	190	194	148	245	214	120	130	231	227	257	127	202	181	405	155	274	99
376	C7_01180W	MDM12	379	AACTGGGTGTTGTCATCGGT	TGG	0	-	29	no	24	24	50	3													1
377	C7_01180W	MDM12	380	CGTTAACTGGGTGTTGTCAT	CGG	0	-	25	no	28	28	45	719	632	800	685	727	560	146	691	588	568	709	707	729	946	899	838	758	1365	275	447	626	534	390	592	603	452	406	562	417	532	407	590	485	69	59	111	438
378	C7_01650W	C7_01650W	381	TTGATGTTTGAGTGAGGAAT	TGG	0	-	127	no	-52	52	35	618	529	712	486	732	544	165	541	434	254	271	356	569	670	691	410	495	701	235	366	510	409	321	336	446	367	444	439	332	446	404	515	534	425	185	412	240
379	C7_01650W	C7_01650W	382	GTTTGATTGATGTTTGAGTG	AGG	0	-	121	no	-46	46	35	184	204	294	205	314	208	75	272	199	234	305	302	334	448	342	243	335	639	125	233	258	303	219	306	308	304	212	248	232	334	207	306	210	462	123	243	125
380	C7_01650W	C7_01650W	383	TGAATCACACATTGCGTAAC	TGG	0	+	225	no	-150	150	40	1585	1415	1769	1381	1842	1418	602	1796	1431	1716	1746	2456	1826	2074	2112	2001	2147	3314	728	1224	1316	1769	1162	1707	1520	1402	1128	1903	1607	2005	1326	1803	1466	3015	1569	3157	831
381	C7_01650W	C7_01650W	384	GCTAGTTAGGAGAACAAAAG	TGG	0	+	405	no	-330	330	40	16658	15921	20973	15777	19793	15721	5681	20269	19988	17948	19038	24073	22719	27581	25650	24839	26871	38956	8689	13857	16790	20281	15214	17392	19367	16518	15363	20978	16650	20765	17132	20964	18091	5779	3450	6537	10235
382	C7_02060W	LIG1	385	CGAAGCACACGACCGTCTTG	TGG	0	+	131	no	-78	78	60	777	700	782	619	911	701	207	820	649	904	957	1047	834	1094	975	955	950	1824	315	539	676	788	604	628	764	679	637	855	756	880	703	716	741	737	275	536	425
383	C7_02060W	LIG1	386	AAAGTTTGACTCATCGATTT	CGG	0	+	91	no	-38	38	30	2470	2392	3266	2382	2824	2323	1068	3031	2824	2584	3004	3666	3394	3646	3650	3629	3511	5372	1283	2008	2600	3249	2337	2747	2716	2361	2264	2788	2311	2594	1786	2022	1725	236	184	291	1408
384	C7_02060W	LIG1	387	AAACTAGACGTGTAGAAGAA	GGG	0	-	24	no	29	29	35	1303	1216	1592	1270	1448	1204	346	1175	1194	494	429	358	1644	1827	1669	676	798	1103	683	1039	1413	635	468	516	1197	1106	1042	431	346	480	759	875	600	377	281	696	557
385	C7_02060W	LIG1	388	GGATTAAATTCCCACAATTG	TGG	0	-	253	no	-200	200	35	6818	7322	9378	6901	8643	6642	2624	9101	9943	9632	11159	13659	9947	11481	10999	10684	11940	16877	4004	6581	7752	9948	7310	8478	8390	6957	6911	10237	8540	10206	7130	8273	7636	14205	9208	17420	4802
386	C7_02680W	TOM22	389	TTTCTTCTTTCTACAATTTG	TGG	0	+	119	no	-64	64	25	116	125	152	105	139	132	51	164	257	109	132	208	138	275	239	138	151	234	69	114	134	98	80	163	205	123	163	79	40	97	121	185	151	12	4		55
387	C7_02680W	TOM22	390	TTCTTCTTTCTACAATTTGT	GGG	0	+	118	no	-63	63	25	839	854	1076	835	1145	883	361	1035	1027	873	854	1269	1132	1281	1131	863	814	1306	476	751	851	596	539	464	903	658	656	660	503	689	747	845	622	1004	416	1229	469
388	C7_02680W	TOM22	391	CAAATCAAAAAATTTGTAGT	TGG	0	-	78	no	-23	23	20	6		8	3	10	14			6					27	13	3		5		1	7					4
389	C7_02680W	TOM22	392	AACGATAATAGTATTCAAGA	TGG	0	+	211	no	-156	156	25	1195	1419	1721	1231	1504	1265	392	1303	1423	1029	1126	1545	1638	2134	1960	1326	1409	2486	650	1121	1235	1360	903	1047	1347	1099	1158	1173	928	900	1089	1518	1187	1217	572	1147	825
390	C7_02770W	CHS1	393	TAATTATATCAAAATTGGAA	TGG	0	+	168	no	-113	113	15	85	90	118	111	131	79	72	121	158	144	181	159	187	244	176	170	202	281	65	128	167	173	140	161	165	115	120	174	115	146	168	118	187	125	67	116	44
391	C7_02770W	CHS1	394	GTATTCTGGAAATTTAAATA	AGG	0	-	30	no	25	25	20	71	55	120	65	67	56	45	124	153	93	74	95	107	111	126	67	157	184	41	52	64	107	86	105	100	61	71	125	95	96	90	87	68	54	28	50	65
392	C7_02770W	CHS1	395	ATGTAGTTTAAAGGGTATTC	TGG	0	-	16	no	39	39	30
393	C7_02770W	CHS1	396	CTTAGATTGTAAGAGAGCAT	TGG	0	+	285	no	-230	230	35	3022	3061	4081	3254	3915	2910	1161	3756	3591	1683	1760	2928	4064	4771	4684	4581	4804	6559	1669	2552	3143	3444	2690	3382	3843	2710	3012	3749	2654	3852	2822	3406	3028	526	292	522	1839
394	C7_02950C	DBF4	397	TCCATCTAACTTCTTGAAAC	AGG	0	+	58	no	-8	8	35	1463	1317	1559	1261	1686	1264	426	1297	1201	1329	1419	1628	1423	1978	1499	1791	1955	2676	570	978	1021	1472	991	1317	1275	1082	1142	1748	1209	1699	682	1033	718	11	10	12	629
395	C7_02950C	DBF4	398	TCCTGTTTCAAGAAGTTAGA	TGG	0	-	54	no	-4	4	35	1998	1887	2633	1812	2333	1871	617	2176	2263	1750	2013	2795	2543	2727	2462	2271	2599	3909	864	1560	1761	2006	1546	1822	2176	1736	1696	2161	1553	1968	1666	2121	1819	151	113	111	1250
396	C7_02950C	DBF4	399	TTAACTAATCACCATCAAAC	AGG	0	+	14	no	36	36	30	1056	1029	1373	955	1308	853	381	1439	1280	1602	1740	2169	1357	1895	1850	1931	2531	3465	635	960	1304	2050	1157	1697	1046	1058	1077	2066	1566	1910	1142	1404	1075	1338	863	1698	575
397	C7_02950C	DBF4	400	AACTGACTTTCTTCCGTATT	TGG	0	-	235	no	-185	185	35	986	972	1207	949	1190	875	299	1029	1124	703	803	1134	1215	1459	1121	919	899	1391	456	673	880	686	605	739	887	909	795	704	552	577	681	792	737	40	27	72	497
398	C7_03000C	C7_03000C	401	TGTTGTGTGTGTGTGTCAAA	AGG	0	-	98	no	-69	69	40	5298	4653	6810	4373	5589	4649	1099	4213	3521	2055	1981	2276	4241	5416	4637	1633	1964	2909	1770	3038	3390	1217	920	1095	3430	2815	2648	1492	1212	1471	2049	2464	2166	2404	1406	3383	1849
399	C7_03000C	C7_03000C	402	TTTCTTTCTATTTGCTTTCT	CGG	0	-	252	no	-223	223	25	92	128	141	111	104	94	61	119	94	61	107	143	187	144	139	147	107	186	38	86	61	108	71	86	102	115	135	84	90	59	60	115	85	42	22	32	29
400	C7_03000C	C7_03000C	403	ATGTTGTTGAGATTTGGATT	TGG	0	+	216	no	-187	187	30	167	174	190	191	190	158	38	98	110	174	112	58	139	108	114	81	141	195	37	80	103	114	35	80	134	105	60	104	95	81	89	67	44	54	167	258	26
401	C7_03000C	C7_03000C	404	GTTGAGATTTGGATTTGGCG	TGG	0	+	211	no	-182	182	45	1597	1375	1926	1450	1819	1504	510	1761	1518	963	1177	1331	1906	2045	1837	1150	1280	1946	641	1033	1440	1080	828	872	1280	1132	1026	672	501	646	642	831	797	695	354	943	858
402	C7_03120W	TIM54	405	TGATGAGTACAAAAGTAGTG	TGG	0	-	111	no	-80	80	35	4389	4143	5639	4533	5509	4240	1043	3310	3228	2287	2590	3515	5398	6817	6142	4620	5186	7336	2015	3447	3959	4253	3011	3609	4220	4060	3526	3759	2658	3650	2678	3137	2634	1539	740	1720	1610
403	C7_03120W	TIM54	406	CTTGTGTGTAGCTTATTCTG	GGG	0	-	23	no	8	8	40	211	204	374	212	236	184	65	367	299	36	23	25	257	445	221	86	123	150	127	243	225	113	56	89	241	189	205	75	69	63	215	258	165	26	6		138
404	C7_03120W	TIM54	407	GCTTGTGTGTAGCTTATTCT	GGG	0	-	22	no	9	9	40	2558	2445	3079	2487	2877	2286	671	2908	2474	414	452	556	2799	3939	3306	1418	1471	2479	1163	1814	2114	1360	777	1061	2471	2141	2041	755	688	845	1670	1830	1683	45	13	17	1183
405	C7_03120W	TIM54	408	TGCTTGTGTGTAGCTTATTC	TGG	0	-	21	no	10	10	40	338	336	380	376	440	270	143	359	416	188	307	254	447	483	453	381	343	611	170	208	279	297	209	311	273	278	282	257	181	243	278	295	234	79	11		162
406	C7_04270C	UFE1	409	GAAAGGAGTTTATTGGTAGG	TGG	0	+	161	no	-143	143	40	1270	1423	1735	1291	1466	1253	502	1705	1441	1699	2057	2401	1766	2183	1746	2146	2442	3752	708	1237	1204	2260	1730	2210	1479	1254	1342	2001	1864	2292	1257	1484	1319	113	37	147	915
407	C7_04270C	UFE1	410	CTTTCCTTCGGGGTTCTTGG	TGG	0	-	176	no	-158	158	55	1177	1201	1478	1141	1549	1102	504	1286	1264	1508	1786	1670	1502	1828	1420	1529	1783	2597	601	954	1053	1459	1314	1290	1316	1036	968	1188	1033	1295	1034	1109	954	260	177	346	563
408	C7_04270C	UFE1	411	GTTGGCGGTTGCGACTTCAA	TGG	0	-	113	no	-95	95	55	108	99	116	75	134	113	28	179	157	157	173	170	138	155	149	101	120	231	46	128	103	82	72	99	67	83	117	115	138	148	122	123	110	80	65	132	53
409	C7_04270C	UFE1	412	GATTGCGTCTTTGTGGTTGG	CGG	0	-	98	no	-80	80	50	545	482	649	523	618	517	269	671	492	523	564	591	696	725	639	547	563	1007	239	425	417	614	372	488	614	513	380	451	521	539	368	642	442	229	106	413	377
410	CR_00250W	ATP17	413	TGTCAAATGCTAATGTCTGT	AGG	0	+	179	no	-155	155	35	4413	4181	5489	4401	5239	4102	1393	5158	4673	2521	3179	4168	5630	6715	6275	4922	5149	7797	2022	3671	4230	3906	2917	3695	4849	4066	3713	3468	2676	3284	3046	3545	3269	550	332	575	2249
411	CR_00250W	ATP17	414	TGTAGGAATTGAGCGCAGAT	TGG	0	+	162	no	-138	138	45	3880	4097	4950	3846	4732	3816	1096	3990	4081	902	967	945	4470	5876	4955	1901	1944	2906	1715	2817	3488	1225	1000	1251	3733	2957	3071	978	873	1136	2123	2560	2272	693	486	906	1611
412	CR_00250W	ATP17	415	TTTCTGGTTGTTTGTTGTGT	GGG	0	-	85	no	-61	61	35	137	142	157	133	158	115	42	163	88	14	5	23	148	164	219	13	29	44	84	132	141	7	36	27	202	111	88	9	22	7	41	59	99	3			43
413	CR_00250W	ATP17	416	ATAGTTACTGTGTTGGTTGT	AGG	0	-	17	no	7	7	35	1210	1257	1592	1115	1450	1179	593	1907	2161	669	488	1560	3156	4511	5224	2654	1815	2514	1056	1893	2434	2296	1080	1546	3747	2767	2628	1068	1152	2033	1446	1793	1678	2169	704	1651	1693
414	CR_00410W	RTT109	417	ATTAGCAAGTGTTGTTATTG	TGG	0	+	191	no	-169	169	30	4520	4540	5974	4307	5715	4407	1651	5647	5533	6904	7059	8791	6663	7557	7198	7547	8333	12483	2417	4127	5008	6499	4847	5850	5583	4573	4397	7593	5860	6853	4439	5705	4359	7560	4327	7812	3063
415	CR_00410W	RTT109	418	TTGTTGTTGGGAATCGATTG	AGG	0	+	114	no	-92	92	40	134	132	170	137	151	112	17	115	82		1		95	73	70	22	9	25	37	83	68	13	5	37	74	36	58	2	7	6	39	25	44				25
416	CR_00410W	RTT109	419	AATCGGTCCAAGTGAATTAC	TGG	0	+	18	no	4	4	40	4431	4091	5894	4135	5255	4141	1633	5981	5597	5867	6371	7409	5760	8102	6934	6427	7500	10842	2316	3888	4201	5269	4082	4832	4869	4200	4124	5497	4399	5632	3704	4611	3994	3028	1584	3400	2526
417	CR_00410W	RTT109	420	GACCGATTGGAAAGTATGAA	AGG	0	-	30	no	-8	8	40	1077	1046	1429	1159	1323	1088	185	790	783	138	137	288	1094	1109	969	229	223	289	449	789	762	230	203	142	730	518	486	112	101	136	426	627	366	182	98	119	372
418	CR_00480W	MRPL6	421	AGTGGCGAATGAAGTTTCGT	TGG	0	+	189	no	-162	162	45	10317	9561	12542	9510	12495	9877	3207	12324	10535	9648	10554	12747	12705	15010	12899	9004	9663	15090	4684	7768	8977	8931	6994	7576	10797	8914	8390	7273	5695	7108	9165	11707	9593	12732	7505	15251	5762
419	CR_00480W	MRPL6	422	AACATGTTCAAAACGAGTGG	TGG	0	-	136	no	-109	109	40	1246	1188	1609	1138	1509	1214	425	1540	1504	658	712	579	1654	2071	1919	1461	1328	2401	688	1035	1205	1370	1012	1052	1259	883	1097	572	489	588	931	1063	950	36	37	30	692
420	CR_00480W	MRPL6	423	TGTCTGTCCCCACGTTCAAG	TGG	0	-	281	no	-254	254	55	8590	7851	11180	8085	10369	8435	2845	10615	9224	8271	8997	11374	11545	13951	13075	13969	14746	22631	4426	7299	8542	11352	8824	11336	9981	8020	8097	11941	9820	11442	8793	11182	9231	849	383	711	5235
421	CR_00480W	MRPL6	424	GAAGGTCTCTAAGATTAAAG	GGG	0	-	244	no	-217	217	35	4945	4962	6698	4582	5940	4689	1822	6277	5886	6315	6959	8963	6967	8093	7569	7096	8059	11934	2824	4473	5107	6280	4543	5526	5738	4742	4871	6575	5326	6676	5262	6682	5505	7111	4341	8139	3518
422	CR_00510C	ADE1	425	CTGTACAAAATGAGATAGCT	TGG	0	-	99	no	-47	47	35	175	138	196	127	152	113	54	198	131	78	81	50	165	235	220	150	114	288	86	130	143	149	117	195	114	109	91	74	34	107	80	104	118	47	33	49	89
423	CR_00510C	ADE1	426	GGATTAGTATTATTTTTTTC	TGG	0	-	51	no	1	1	20	346	351	422	322	368	305	125	303	332	319	340	531	602	580	516	526	588	764	234	339	477	564	322	408	537	407	343	389	410	495	427	437	247	427	322	642	207
424	CR_00510C	ADE1	427	AGCAAAAAGAATAGTTGACT	CGG	0	-	30	no	22	22	30	2268	2175	3107	1879	2719	2047	866	2612	2727	1766	1782	2262	2997	3475	3198	2197	2654	3809	1244	2023	2407	2283	1644	1912	2783	2172	2135	1535	1265	1568	2104	2245	2229	376	237	652	1477
425	CR_00510C	ADE1	428	TGTAGGATTATGTGAGTATG	AGG	0	+	195	no	-143	143	35	2299	2087	2933	2268	2895	2298	853	2400	2501	3125	2985	4162	2699	3408	3435	3110	3315	4915	1190	1847	2336	2536	1939	2387	2481	1966	2159	3004	2337	2676	2106	2528	2184	2697	1713	2955	1603
426	CR_00680W	BUD22	429	TAGGAAAACCGCGAAAGCAT	TGG	0	+	85	no	-66	66	45	2801	2665	3438	2418	3011	2450	786	2891	2616	236	268	323	3555	3966	3808	1645	1687	2471	1312	2210	2476	1226	901	1284	2996	2379	2335	1355	905	997	1582	2261	1748	101	83	152	1358
427	CR_00680W	BUD22	430	AAATAGATGGAATCAAAAAG	TGG	0	-	47	no	-28	28	25	386	381	486	374	431	317	137	466	478	138	173	225	490	632	456	326	416	551	201	277	354	329	274	299	356	349	326	343	224	293	378	296	243	38	13	23	176
428	CR_00680W	BUD22	431	TTGCACCTTCTATTCTTTCT	AGG	0	+	259	no	-240	240	35	556	464	682	420	632	493	145	769	810	602	697	802	659	809	728	784	1023	1156	287	407	521	708	521	442	476	461	407	688	595	699	452	546	543	550	313	676	262
429	CR_00680W	BUD22	432	TCTAGGTAGAATATATTCAC	AGG	0	+	242	no	-223	223	30	278	257	367	273	375	264	122	311	279	378	395	373	393	465	417	495	559	810	141	208	267	419	321	341	368	198	265	484	342	507	254	331	249	395	190	561	184
430	CR_00890C	CR_00890C	433	GGAGAGGAAACAAACCAACC	AGG	0	+	112	no	-85	85	50	3202	2985	4019	2990	3611	2972	963	2975	2638	579	765	1026	3432	4437	3668	1707	1902	2991	1254	2149	2588	1797	1200	1654	2670	2213	2245	1395	1124	1327	1720	2031	1563	399	152	372	1399
431	CR_00890C	CR_00890C	434	AAATGAATTGTTCAGTTTCG	AGG	0	-	286	no	-259	259	30						1
432	CR_00890C	CR_00890C	435	CTATAGCCACTACTTACTAG	TGG	0	+	235	no	-208	208	40	110	113	67	77	107	92	46	102	57	94	108	236	110	296	117	203	308	175	50	182	242	120	123	160	111	139	87	114	138	165	180	93	132	147	11	39	48
433	CR_00890C	CR_00890C	436	CCTTTCCCACTAGTAAGTAG	TGG	0	-	226	no	-199	199	45	411	374	508	419	459	383	153	490	477	272	279	354	629	641	514	359	413	795	223	313	359	413	319	299	479	378	440	286	205	250	364	364	434		5		341
434	CR_01300W	CR_01300W	437	CCCATTGTGCACGACTAAAT	AGG	0	+	256	no	-207	207	45	514	511	666	516	635	491	192	580	525	277	308	295	665	827	807	257	376	439	256	580	534	305	243	637	550	407	428	283	190	271	422	431	381	134	77	125	327
435	CR_01300W	CR_01300W	438	GCACGACTAAATAGGTTACT	TGG	0	+	248	no	-199	199	40	1862	1776	2391	1674	2220	1688	591	1915	1981	1831	1961	2425	2518	3177	2670	1755	1598	2758	860	1478	1804	1697	1251	1659	2118	1899	1776	1218	1136	1332	1596	2086	1726	1089	630	1334	1150
436	CR_01300W	CR_01300W	439	CTATTTAGTCGTGCACAATG	GGG	0	-	254	no	-205	205	40	146	125	153	139	149	141	47	128	136	17	40	15	105	167	191	75	113	168	62	84	128	71	62	65	102	73	104	38	37	49	115	85	120				60
437	CR_01300W	CR_01300W	440	CCTATTTAGTCGTGCACAAT	GGG	0	-	253	no	-204	204	40	4289	4329	5548	4102	5417	4020	1482	4828	4895	5662	5777	6933	5615	6688	6536	5902	6256	9364	2224	3832	3931	5256	4003	5088	4859	4094	3898	4676	4274	5458	4047	5326	3995	6814	3938	7554	2745
438	CR_01370C	CR_01370C	441	ACACTTGATGGAAATGAATG	TGG	0	+	159	no	-111	111	35	1133	1047	1461	1050	1394	1026	496	1136	1179	374	429	479	1347	1732	1529	539	451	616	450	739	1061	377	271	384	1116	996	728	243	225	319	951	1139	866	266	159	233	681
439	CR_01370C	CR_01370C	442	TGTGGTCGTGCAAAGCAACC	AGG	0	+	141	no	-93	93	55	2592	2422	3187	2473	3178	2623	827	2928	2630	638	726	696	2843	3560	3250	702	619	979	1133	1748	2029	647	493	723	2110	2018	1836	290	253	284	1703	1871	1778	356	136	249	1327
440	CR_01370C	CR_01370C	443	GGTCTTGGATCGTAAGTTTG	AGG	0	+	120	no	-72	72	45	21150	19759	26446	19714	25334	19521	6192	22723	20233	5615	6167	7380	23306	27530	26719	5667	5971	9460	10197	15818	18799	6706	4294	5634	19986	16076	15946	2708	2019	2613	16708	20344	17365	3903	1787	4689	10852
441	CR_01370C	CR_01370C	444	TAAGTATCGATTACTCTCTT	GGG	0	-	49	no	-1	1	30	661	613	858	605	725	639	102	223	333	2	4	4	351	432	393	8	9	14	157	204	231	5	14	9	251	187	160	9	2	8	160	246	223	10	10	18	167
442	CR_01620C	MET6	445	AACTGTGTGTGTGTGCGTGT	GGG	0	-	251	no	-195	195	50	805	644	742	585	812	600	185	838	487	1057	906	1170	806	843	897	766	973	1312	307	547	584	554	472	595	737	571	529	656	581	614	630	726	578	824	531	1085	360
443	CR_01620C	MET6	446	AAACTGTGTGTGTGTGCGTG	TGG	0	-	250	no	-194	194	50	165	198	262	177	250	222	106	240	271	218	235	262	321	297	401	234	309	469	112	159	249	228	200	218	225	188	133	203	212	258	199	225	250	162	149	162	97
444	CR_01620C	MET6	447	TCGCCGCCCACTCCTCGTTT	AGG	0	+	220	no	-164	164	65	5496	4927	6369	5004	6459	5077	1738	6057	5249	5884	6163	7698	6416	7806	7700	6331	6202	9370	2456	4150	4926	4892	3925	4841	4864	4324	4498	4784	3920	4821	3894	5174	4219	5212	2495	6257	2775
445	CR_01620C	MET6	448	ATTCCTAAACGAGGAGTGGG	CGG	0	-	214	no	-158	158	50	1660	1665	2280	1593	2006	1611	483	1709	1844	34	48	37	2238	1971	2067	190	225	373	784	1294	1511	309	199	236	1609	1388	1302	86	111	94	1328	1708	1477		9	11	1018
446	CR_02090C	CET1	449	TGTCAGAACTAGCTTGTTGA	TGG	0	+	45	no	-13	13	40	7907	7614	9562	6982	9291	7414	2440	8941	8189	8832	8825	10966	8901	10998	10233	9178	9691	14442	3678	5537	6788	7666	6101	7488	7756	6617	6262	7390	6041	7654	6432	8422	6883	6022	3791	6797	4471
447	CR_02090C	CET1	450	GTCAGAACTAGCTTGTTGAT	GGG	0	+	44	no	-12	12	40	3057	3129	4007	2867	3616	3071	1104	3705	3049	1850	2129	2814	4152	4987	4363	3589	3663	5487	1531	2336	2944	2464	1834	2273	2852	2651	2492	1791	1547	1812	2651	3146	2588	170	144	314	1702
448	CR_02090C	CET1	451	GGCAACCGTTGACTTGTTTA	TGG	0	+	23	no	9	9	45	10154	9508	12205	9684	12018	9219	3503	10716	10257	10852	11414	14377	12380	15062	13078	11906	12656	19199	4931	7543	9271	10155	8110	9557	10777	8834	8276	10114	8384	10105	8398	10166	8462	15802	9292	17241	5534
449	CR_02090C	CET1	452	TATGGCCATAAACAAGTCAA	CGG	0	-	15	no	17	17	35	6879	6899	9100	6798	8489	6732	2382	8156	7638	8658	8698	10700	9225	11737	10695	9250	9738	14452	3514	5850	7104	7828	5856	6712	8226	6748	6530	7067	5770	6977	6131	7819	6842	4994	3355	5787	4343
450	CR_02540W	CHO2	453	TGTTGTAAGAATATATAATT	AGG	0	-	135	no	422	422	15	6653	7604	9235	6826	8525	6354	3079	8872	9597	7626	9185	11701	10232	11506	11195	10396	11351	15727	4330	6810	8206	10074	6786	7673	8636	7051	7254	8787	7630	9823	7711	8275	8531	7187	4789	9383	5182
451	CR_02540W	CHO2	454	TAGATTAATATAATTTAGTT	TGG	0	+	107	no	450	450	10	769	1020	1246	886	1027	758	380	1007	1544	903	1110	1677	1470	1440	1460	1256	1475	1910	612	1073	1185	1712	944	1049	1247	1077	1047	1261	1072	1257	1162	1143	1302	1797	1437	2854	767
452	CR_02540W	CHO2	455	TGCAATATGTAATATGATCT	GGG	0	-	255	no	302	302	25	365	361	400	395	446	388	105	302	400	514	620	667	375	513	603	552	602	774	187	303	333	369	337	366	419	292	280	541	344	505	411	433	406	589	335	710	249
453	CR_02540W	CHO2	456	ATGCAATATGTAATATGATC	TGG	0	-	254	no	303	303	25	1					2
454	CR_02580W	PAN6	457	TCCGCGTAAGATTCTTCTAC	AGG	0	+	96	no	-65	65	45	865	773	890	784	878	664	239	1026	683	522	571	594	1081	1218	1224	1016	1325	1962	461	703	930	1061	738	891	1078	740	546	934	741	923	531	635	525	32	36	57	476
455	CR_02580W	PAN6	458	CCGCGTAAGATTCTTCTACA	GGG	0	+	95	no	-64	64	45	236	156	263	156	197	182	43	166	189	29	29	38	202	244	147	62	133	100	62	114	139	29	63	52	180	136	166	41	19	45	93	123	62				26
456	CR_02580W	PAN6	459	CCCTGTAGAAGAATCTTACG	CGG	0	-	92	no	-61	61	45	447	357	609	442	547	412	134	463	585	642	634	735	637	740	684	649	797	1143	201	374	415	517	450	474	357	433	491	562	460	582	418	436	393	735	447	699	208
457	CR_02580W	PAN6	460	GTGGTGGAGTGATTCCTTAC	AGG	0	-	41	no	-10	10	50	66	51	57	44	59	57	16	61	36		8	7	44	92	51	16	6	6	20	67	20		9	11	32	40	33			19	23	26	42		9		13
458	CR_02990C	RIB1	461	AATTGTTGAATAATTTATAA	TGG	0	-	208	no	-27	27	10	313	395	485	367	450	330	171	379	506	53	65	129	460	447	518	133	124	202	194	327	398	141	66	140	503	337	370	134	130	150	315	298	253		10	6	190
459	CR_02990C	RIB1	462	CATTGATTTGTCCTTGTGTT	TGG	0	+	177	no	4	4	35	21	41	68	49	61	51	29	36	82	116	87	124	60	90	75	72	129	150	26	45	37	61	40	54	29	25	46	80	45	52	37	40	40	84	57	75	17
460	CR_02990C	RIB1	463	CAAACACAAGGACAAATCAA	TGG	0	-	175	no	6	6	35	476	446	648	480	578	485	161	413	615	194	153	155	503	663	626	213	200	201	213	412	390	135	112	169	525	428	480	230	143	214	385	449	518	13	5	31	214
461	CR_02990C	RIB1	464	TAAATTTATTAAATGGGTTG	TGG	0	-	25	no	156	156	20	809	1040	1215	826	1105	790	508	1217	1268	1048	1279	1682	1480	1557	1525	1325	1725	2211	681	996	1210	1703	1113	1254	1105	1006	951	1478	1281	1387	1202	1184	1161	1890	1386	2330	749
462	CR_03430W	CR_03430W	465	TCTCAACATGTAGTCGTGTG	TGG	0	+	129	no	-87	87	45	2119	1943	2441	1945	2381	1923	661	2124	2149	729	774	935	2531	3086	2985	1722	1884	2780	1045	1547	1685	1287	1034	1016	2042	1646	1631	1000	558	718	1667	1903	1557	586	257	732	1020
463	CR_03430W	CR_03430W	466	GTCGTGTGTGGTTCAACATT	AGG	0	+	117	no	-75	75	45	1321	1329	1612	1326	1667	1240	361	1409	1500	855	845	1208	1586	2130	1803	1261	1322	1949	554	799	1006	1091	666	880	1319	1058	1144	827	568	712	1048	1321	1251	852	503	1167	677
464	CR_03430W	CR_03430W	467	AAACTTGACTTCTTACTTCT	AGG	0	+	16	no	26	26	30	369	391	444	393	469	362	123	635	420	479	589	665	463	455	553	462	484	717	224	324	398	499	331	405	341	391	331	450	444	481	460	443	372	219	242	436	230
465	CR_03430W	CR_03430W	468	GAAGTAAGAAGTCAAGTTTA	TGG	0	-	17	no	25	25	30	1668	1604	2078	1597	2082	1613	627	2067	2226	2099	2386	2858	2468	2779	2509	2079	2555	3757	922	1502	1807	2151	1640	1597	1914	1625	1520	2060	1639	2146	1665	2137	1565	3303	2087	3931	1143
466	CR_03530W	CR_03530W	469	TCAGTGAGTTGCTCACTGAT	TGG	0	-	175	no	-95	95	45					5	3
467	CR_03530W	CR_03530W	470	GAACTGTACCAAGTGAGAGG	GGG	0	+	155	no	-75	75	50	4680	3953	5096	2938	4060	3099	758	3168	2683	183	249	262	4813	6025	5802	350	937	1003	1915	2894	3639	880	550	519	4839	4277	3158	254	185	182	1661	2015	1789	192	148	172	1468
468	CR_03530W	CR_03530W	471	TTCTTTGACCCCCTCTCACT	TGG	0	-	144	no	-64	64	50	3940	3620	4550	3418	4645	3276	1042	3196	3302	2706	2939	3492	4503	5500	5572	3913	4362	6277	1839	3225	4000	3766	2784	3156	3889	2952	3144	4136	3176	3956	3690	4349	3345	959	418	1041	2065
469	CR_03530W	CR_03530W	472	ACACTACCCCAATATTTGAT	TGG	0	+	261	no	-181	181	35	858	730	1050	717	931	730	262	1079	964	883	954	1261	1048	1306	1023	988	1143	1802	451	718	803	1006	771	801	947	748	639	966	792	1036	711	903	841	1570	812	2412	467
470	CR_03930C	CR_03930C	473	AAAAAATGCGTTATTAAGAC	TGG	0	+	179	no	-139	139	25	227	237	277	245	317	220	76	224	342	260	348	332	248	336	370	326	395	500	124	221	258	281	213	275	169	207	207	291	296	297	275	315	288	421	313	478	139
471	CR_03930C	CR_03930C	474	TCTATTATATCTTTACGAGC	AGG	0	+	274	no	-234	234	30	365	485	551	377	525	400	162	556	391	533	730	839	570	680	775	645	631	920	279	420	456	725	481	500	469	391	381	635	529	674	512	481	458	900	582	1093	291
472	CR_03930C	CR_03930C	475	TTTACGAGCAGGAAAAGACT	AGG	0	+	263	no	-223	223	40	1232	1153	1636	1164	1658	1242	437	1457	1406	1347	1224	1414	1608	2058	2073	1753	1688	2763	662	1052	1348	1442	1066	1344	1324	1089	1135	1259	1041	1377	856	1202	1039	363	186	184	575
473	CR_03930C	CR_03930C	476	ATAATTAATGTATACAATTA	AGG	0	+	239	no	-199	199	10
474	CR_03950W	CR_03950W	477	CAACCACATACAATATATTG	GGG	0	+	152	no	-136	136	30	96	110	147	111	102	75	41	80	97	111	99	110	91	144	175	166	106	217	36	92	114	126	100	76	107	51	96	133	116	108	87	82	57	142	56	82	48
475	CR_03950W	CR_03950W	478	TTACCCCAATATATTGTATG	TGG	0	-	146	no	-130	130	30	1427	1615	2010	1304	1850	1403	601	2011	1969	671	785	1016	2059	2402	2602	1524	1889	2827	917	1453	1593	1403	1130	1250	2008	1594	1404	1225	1148	1288	1237	1610	1445	7		8	881
476	CR_03950W	CR_03950W	479	CTTATTGACCTTCTCTTATC	AGG	0	-	240	no	-224	224	35	327	329	370	249	300	315	128	343	351	356	450	376	507	502	461	508	618	774	165	280	308	370	244	368	409	282	257	385	323	618	258	313	311	443	282	556	203
477	CR_03950W	CR_03950W	480	GTAGTATGGTTCTTTCTGTT	AGG	0	+	197	yes	-181	181	35	361	397	472	400	500	434	141	539	447	646	599	703	590	697	626	631	639	1035	243	315	439	744	379	505	495	413	470	566	453	643	439	379	406	289	147	264	337
478	CR_04140W	CR_04140W	481	CGGTATTACTTTCACTGGGG	AGG	0	-	206	no	-155	155	50	1177	1164	1468	955	1312	976	403	1016	1020	4		16	1555	1857	1547	210	149	200	533	876	999	121	129	188	1234	1034	971	43	32	54	852	1144	837	226	3	29	631
479	CR_04140W	CR_04140W	482	ATTCGGTATTACTTTCACTG	GGG	0	-	203	no	-152	152	35	185	198	281	172	218	153	44	147	159	37	53	52	198	248	189	64	39	104	93	129	126	52	43	49	134	97	127	24	29	29	54	48	85	37	16	12	45
480	CR_04140W	CR_04140W	483	ATACAATTTACAATTGATTG	AGG	0	+	118	no	-67	67	20	90	102	118	107	145	101	37	115	49	36	33	29	90	77	87	21	47	58	53	61	71	54	8	27	70	42	69	35	35	27	72	76	32	49	30	132	39
481	CR_04140W	CR_04140W	484	GTTGTGTTTGACCTATAGGT	TGG	0	-	38	yes	13	13	40	1401	1384	1558	1341	1670	1250	493	1569	1236	425	277	409	1815	1648	1713	539	476	855	678	1120	1301	525	308	427	1186	1040	1061	271	221	250	739	943	809	215	90	313	775
482	CR_04520W	MIM1	485	ATGTAGTTTTGAAGTGATAG	TGG	0	+	176	no	-135	135	30	229	192	236	187	284	190	90	246	234	189	212	224	327	310	336	397	320	486	158	207	202	304	205	199	258	221	211	335	248	320	245	294	290	93	43	39	96
483	CR_04520W	MIM1	486	ACTGTACACGACTTCTTTGA	TGG	0	-	136	no	-95	95	40	19270	17890	23148	18533	23053	18120	6387	23791	21945	36047	37185	43359	25511	30859	28686	32914	34922	52640	9598	15712	18630	23254	18020	21603	21685	17544	17038	29983	21458	27878	17597	21770	18636	46828	27289	54590	11408
484	CR_04520W	MIM1	487	TGTATAAGTAAATAAAAATC	AGG	0	-	65	no	-24	24	15	53	30	45	33	52	49	32	57	51	7	27	38	69	74	84	50	90	78	39	40	56	51	26	39	50	43	41	35	45	47	24	38	41		5	5	7
485	CR_04520W	MIM1	488	AGAATAAAGATCAAGAATTT	AGG	0	+	214	no	-173	173	20	4715	4834	6702	4503	5699	4351	1676	5721	6392	6013	6946	9066	6754	7473	7056	7052	8071	11546	2862	4737	5141	6950	5117	5747	5923	4795	5065	7209	5575	6774	5222	5404	5637	9816	6003	11812	3645
486	CR_05100W	BIR1	489	TTTCAGATGTTCCCTGTTAT	CGG	0	+	190	no	-135	135	35	291	371	455	277	383	368	126	452	551	376	421	452	445	505	523	514	487	757	154	283	324	383	361	392	394	271	289	465	386	512	321	342	247	482	214	523	236
487	CR_05100W	BIR1	490	CGTGCAACGCCAATACATTA	CGG	0	+	162	no	-107	107	45	1657	1609	2069	1540	2058	1703	583	1951	1844	449	548	684	1928	2610	1973	1527	1437	2322	742	1251	1354	1241	1017	1172	1625	1408	1313	1057	951	1175	1227	1693	1463	1042	612	1423	918
488	CR_05100W	BIR1	491	GTGCAACGCCAATACATTAC	GGG	0	+	161	no	-106	106	45	383	378	472	332	460	356	120	363	286	210	220	245	407	624	510	387	324	589	211	249	305	264	160	223	357	315	292	289	238	245	352	355	256	164	133	190	215
489	CR_05100W	BIR1	492	TTGCACGAAGTACCGATAAC	AGG	0	-	175	no	-120	120	45	432	351	542	395	604	461	211	622	354	545	577	698	620	828	636	575	759	1209	243	383	414	503	448	521	450	487	432	725	537	712	417	486	412	1184	679	1116	177
490	CR_06640C	CR_06640C	493	ACTAAAATATTGTTGTGGTG	TGG	0	-	193	no	30	30	30	654	594	832	636	852	658	312	807	643	707	761	1302	972	1102	1006	813	1030	1414	391	559	814	873	698	831	751	601	625	817	763	748	623	652	831	442	266	489	496
491	CR_06640C	CR_06640C	494	AGAATACTAAAATATTGTTG	TGG	0	-	188	no	35	35	20	3264	3402	4734	3255	4093	3200	1417	4254	4649	3827	4191	5540	4714	5276	5328	4534	5508	7409	2069	3328	3858	4794	3358	3912	4398	3526	3607	5643	4340	5545	3304	3938	3593	6511	4108	7871	2308
492	CR_06640C	CR_06640C	495	TACTTCAACAGTATATACAC	TGG	0	+	124	no	99	99	30	697	722	908	629	870	673	262	849	857	900	1040	1141	1172	1193	1154	1284	1329	1948	428	715	851	1115	872	899	663	693	638	1123	885	1106	735	794	755	759	451	1013	473
493	CR_06640C	CR_06640C	496	GTTCTTCTTCTTCTTCTTCT	TGG	0	-	254	yes	-31	31	35	2220	2298	2900	2097	2640	1995	858	2596	2355	1943	2281	2505	3020	3304	2878	2476	2779	4049	1240	1867	2262	2247	1508	1883	2375	2171	1980	1822	1539	1991	1825	2052	1679	937	654	1226	1215
494	CR_07390C	MRPL8	497	GCTATAACGTTACTAGTAGT	AGG	0	-	141	no	-114	114	35	5138	4709	6623	4357	5745	4349	1462	5341	4860	1830	1985	2704	6285	7351	6955	3272	3654	5263	2524	4021	4995	3866	2808	3257	5080	4127	4219	1877	1519	1863	2936	3419	3208	16	27	3	2756
495	CR_07390C	MRPL8	498	TGCGCACAATTTCCTGCACA	TGG	0	+	119	no	-92	92	50	984	932	1232	904	1235	909	245	877	857	871	961	1324	1241	1210	1199	1343	1434	2134	459	803	761	779	717	761	891	677	816	891	776	907	653	1053	808	70	81	88	562
496	CR_07390C	MRPL8	499	GAGTATAGTGATCCATGTGC	AGG	0	-	104	no	-77	77	45	31	25	29	30	45	28	3	35	57	23	55	63	27	40	12	26	52	57	12	29	33	33	43	49	34	9	19	27	36	14	7	34	17	21	8	24	6
497	CR_07390C	MRPL8	500	TAGGGTTGATTAAAAGAGAA	AGG	0	-	21	no	6	6	30	5593	5768	7328	5369	6890	5348	1993	6099	6414	1737	1887	2456	6983	7853	7629	2919	2976	4429	2983	4714	5469	2944	1836	2529	5744	4756	4605	1465	1075	1303	3683	4119	4026	664	463	979	3072
498	CR_07710W	ARO2	501	GCCTCGAGTGCTAATGCCAA	AGG	0	+	273	no			55	7260	7056	8634	6897	8383	6912	2288	8780	7016	8899	9463	10642	9190	10896	9898	9113	9698	13667	3555	5366	6449	7150	5953	7121	7409	6166	6123	7969	6373	7928	6014	7052	6163	12747	7459	13277	3839
499	CR_07710W	ARO2	502	ACCTTTGGCATTAGCACTCG	AGG	0	-	269	no			50	911	842	1025	766	1008	816	275	1048	832	1206	1177	1435	1364	1322	1356	1377	1382	2449	448	728	743	985	923	1076	1057	821	770	1191	1010	1177	806	944	913	1521	1086	1507	391
500	CR_07710W	ARO2	503	ATATTTGAGTGAATTGGCTA	TGG	0	+	232	no			30	64	83	79	48	95	58	31	92	75	87	86	95	71	100	72	93	93	183	32	71	82	138	87	66	83	47	62	55	35	73	56	145	92	121	79	158	28
501	CR_07710W	ARO2	504	ATAGCCAATTCACTCAAATA	TGG	0	-	231	no			30	1196	1331	1538	1086	1435	1105	426	1511	1659	1412	1654	2120	1634	2017	1757	1646	1942	2798	693	886	1331	1498	1251	1475	1419	1311	1218	1481	1134	1416	1251	1435	1265	770	470	793	786
502	CR_09320C	PHO88	505	AGCGAGTAGTAGTAGTTTGT	TGG	0	+	257	no	-183	183	40	3365	3107	3975	3119	3848	3151	1115	4218	3620	4489	4594	5747	4076	5082	4776	4249	4741	7388	1661	2588	3208	3647	3041	3652	3422	2846	2812	3736	3082	3915	2918	3516	3067	6027	3150	6814	1889
503	CR_09320C	PHO88	506	GAGTAGTAGTAGTTTGTTGG	CGG	0	+	254	no	-180	180	40	389	476	581	462	568	419	168	421	358	575	542	781	628	661	729	646	607	864	185	388	535	580	446	441	532	406	334	516	405	536	414	499	353	421	232	493	271
504	CR_09320C	PHO88	507	GTAGTAGTAGTTTGTTGGCG	GGG	0	+	252	no	-178	178	45	369	462	552	382	466	425	174	473	511	656	700	669	575	607	735	673	764	1247	226	354	401	484	496	450	385	347	380	503	486	574	451	589	442	928	410	979	341
505	CR_09320C	PHO88	508	TAGTAGTAGTTTGTTGGCGG	GGG	0	+	251	no	-177	177	45	459	499	545	423	564	438	149	731	553	592	562	627	578	679	735	668	625	1117	275	436	436	566	499	545	512	451	439	526	458	621	410	508	535	801	598	975	260
506	CR_09760W	MED21	509	AATGTTGGGTTAGTTGGTCT	TGG	0	-	18	no	17	17	40	1302	1194	1715	1181	1524	1202	466	1419	1130	1921	2045	2297	1517	1847	1850	1595	2084	2629	627	968	1169	1432	1354	1419	1357	1177	1016	1594	1229	1450	1188	1272	1005	2501	1444	2797	737
507	CR_09760W	MED21	510	CGAGGGCGCGGGGGGAGGGG	TGG	0	-	221	no	-186	186	90	1393	1205	1624	1262	1651	1174	405	1583	1476	1246	1630	1743	1535	2102	1551	1337	1379	1882	571	970	1144	1063	902	1080	1095	1184	1165	967	723	825	1002	1209	1022	71	69	99	676
508	CR_09760W	MED21	511	ATACGAGGGCGCGGGGGGAG	GGG	0	-	218	no	-183	183	75	3598	3112	4150	3503	4286	3387	1279	4237	4064	2666	2977	3690	3817	4814	4263	2502	2611	3981	1772	2523	3017	2956	2235	2735	3557	2938	2633	1622	1326	1704	2970	3645	2552	530	380	507	1803
509	CR_09760W	MED21	512	TATGTAATACGAGGGCGCGG	GGG	0	-	212	no	-177	177	55	4909	4815	6019	4523	5751	4594	1930	5965	5878	6323	7078	7939	6628	7963	7609	7488	8252	12186	2854	4184	4910	6527	4870	5864	5841	4781	4627	7304	5714	7614	4323	5603	4248	7600	4402	8651	3035
510	CR_10010C	MSS51	513	TATCTAATATCTAATAAACA	CGG	0	-	141	no	11	11	15	536	596	677	486	684	532	303	742	882	424	669	680	930	969	828	814	878	1301	391	619	731	941	663	793	750	529	644	673	567	688	666	740	742	84	69	105	530
511	CR_10010C	MSS51	514	TAAAATTCAAATCCCATTGT	CGG	0	-	282	no	-130	130	25	1385	1440	1984	1295	1752	1258	541	1842	1979	1660	1962	2555	1986	2385	2240	1770	2235	2903	830	1354	1719	1729	1260	1541	1862	1307	1380	1820	1389	1881	1584	1534	1585	1497	786	1726	901
512	CR_10010C	MSS51	515	ATTAAAATAGGCTGATGAGT	AGG	0	-	24	no	128	128	30	2508	2751	3468	2484	3041	2515	1051	3307	3163	3037	3522	4284	3919	4123	4161	3389	3602	5558	1458	2598	2963	3387	2443	2892	3072	2493	2536	2761	2463	2812	2168	2654	2252	296	194	494	1875
513	CR_10010C	MSS51	516	CCAAAAGGATAAATTAAAAT	AGG	0	-	12	no	140	140	20	2337	2614	3356	2380	2957	2206	1009	3492	3280	3107	3667	4515	3714	4231	4018	3878	4412	6154	1448	2562	2743	3873	2801	2989	3238	2589	2467	3915	2962	3791	2774	3156	3156	5986	3453	6433	1888
514	CR_10650W	LTV1	517	AATGCAAGCACGTATCCTAA	AGG	0	-	241	no	-224	224	40	4777	4509	5427	4383	5362	4088	1592	5534	4733	5603	5972	7184	5587	7200	6144	6126	6302	9424	2224	3555	3842	5255	3891	4958	5045	4089	3796	5452	4359	5648	4035	5106	4228	7466	4380	8476	2541
515	CR_10650W	LTV1	518	AAATTTGGTATGGAGATGAG	TGG	0	+	220	no	-203	203	35	61	30	106	75	89	53	26	66	88	3	7	7	81	114	145	6	22	46	52	98	85	19	19	3	55	47	50	3	11	5	48	90	68				24
516	CR_10650W	LTV1	519	GTATGGAGATGAGTGGGTTA	TGG	0	+	213	no	-196	196	45	1191	1193	1596	1187	1474	1120	486	1293	1634	1467	1758	1961	1494	1826	1732	1865	1742	2723	565	1098	1140	1373	1170	1429	1387	1176	963	1501	1306	1560	1237	1732	1195	2216	1267	2212	818
517	CR_10650W	LTV1	520	TTATGGATTGGATTGACTAT	TGG	0	+	196	no	-179	179	30	421	421	652	392	509	371	97	482	482	536	585	612	581	610	580	686	620	938	245	318	394	481	456	449	509	373	311	513	461	474	346	486	473	502	291	558	265
518	C7_02030W	HSP90	521	ATTTTTCCAGTGGTCTCCGT	TGG	0	+	131	no	-99	99	45	92	91	96	94	98	72	23	50	101	15	12	12	59	188	117	24	53	45	46	43	104	18	31	26	123	79	75	21	33	31	57	61	77			11	16
519	C7_02030W	HSP90	522	TGGCAACCAACGGAGACCAC	TGG	0	-	122	no	-90	90	60	159	156	166	139	166	126	48	143	126	4	1	6	113	251	163	146	106	111	54	231	936	79	86	144	117	85	97	158	30	60	74	114	43	95	4		24
520	C7_02030W	HSP90	523	AGGTAGTAATATGGTGCTGC	TGG	0	-	267	no	-235	235	45	215	223	275	189	259	196	95	244	258	179	286	251	352	267	256	270	370	469	131	212	150	295	227	196	180	246	117	299	253	332	174	242	151	322	271	324	140
521	C7_02030W	HSP90	524	AACGGGAGGAGTTGATAAAC	TGG	0	-	70	no	-38	38	45	18765	17366	23409	17514	21851	17811	5073	19635	18840	3707	4039	5547	22966	28155	25631	13407	14169	20690	8575	13624	16165	10848	8577	11124	20520	16468	16311	12569	10184	12858	13601	17069	14576	1786	817	1926	9457
522	R-_sgRNA 1		525	CTGCAGAGAGATCATAACTT		1			no			40	1682	1455	2136	1545	1930	1519	539	1760	2022	2332	2342	3069	2092	2371	2608	2325	2615	3958	737	1392	1689	2085	1571	1829	1786	1446	1445	2340	1813	2315	1489	1731	1534	2966	1757	3021	1037
523	R-_sgRNA 2		526	CGGGGTACGGCTTTAATACT		1			no			50	709	659	1013	637	959	689	243	914	707	935	1031	1277	912	1157	1148	1162	1148	1705	386	539	729	979	780	808	918	690	707	1037	941	985	678	694	790	754	366	691	418
524	R-_sgRNA 3		527	ATAGATTTTTTGCCGGTACA		1			no			35	12790	13460	17453	12452	16204	12137	5076	16526	15432	17303	19585	24512	18691	21401	19940	19753	21750	31936	7477	12240	14286	18488	13495	15480	15321	12956	12260	18795	14481	19083	13652	15329	14019	25693	16705	32208	7691
525	R-_sgRNA 4		528	TAACATTGGAGTCGCTACTC		1			no			45	1019	978	1248	950	1252	1018	361	1257	1200	1258	1360	1578	1360	1559	1319	1408	1355	2021	590	737	1080	1122	915	956	1241	779	823	1275	990	1220	831	1427	937	973	492	893	542
526	R-_sgRNA 5		529	AGCAGAGTGCATAGCTACTC		1			no			50	231	190	202	263	257	176	41	267	212	203	278	195	267	325	284	229	219	418	123	151	144	206	163	225	179	204	128	245	175	169	172	170	128	113	58	87	87
527	R-_sgRNA 6		530	AAGGGAGTCGTAATAGGAAG		1			no			45	12265	11563	15441	11123	14011	11062	4273	14006	13540	3074	3319	3849	15733	19960	17899	6160	6469	9668	6309	9794	12490	5592	4179	5597	13055	10617	10102	3298	2906	3178	7196	8554	7437	561	268	790	6637
528	R-_sgRNA 7		531	GCATGACTGTGGATAGAGGT		1			no			50	1804	1594	2147	1718	2167	1687	533	2183	1738	416	497	532	2296	2680	2701	1392	1513	2445	774	1420	1683	1091	881	1153	2052	1711	1606	840	709	730	982	1426	1136		22	18	780
529	R-_sgRNA 8		532	TCCACTGGACTCGCCCCCTC		1			no			70	1609	1423	1896	1410	1920	1458	451	1717	1587	1598	1491	2047	1752	1973	1990	1636	1617	2557	739	1070	1215	1267	925	1225	1420	1167	1119	1361	1044	1414	884	1391	1050	89	42	147	819
530	R-_sgRNA 9		533	TACCACGTCTTCAGATCTCG		1			no			50	908	798	1334	898	1006	942	338	1122	959	966	985	1253	1121	1362	1311	988	1037	1418	425	854	892	969	733	842	1006	759	689	915	796	793	700	991	869	1565	868	1580	535
531	R-sgRNA 10		534	ATCAGTCCGAAGCCGTGCGG		1			no			65	813	737	999	741	929	690	193	953	797	928	1100	1168	973	1166	1064	853	1250	1553	295	587	610	855	659	944	819	679	719	989	608	958	553	791	829	1359	814	1752	475
532	R-sgRNA 11		535	GTCCAACTAAATGGTGCCAC		1			no			50	469	493	596	466	583	480	166	455	532	691	965	1010	733	885	628	756	1000	1483	303	362	456	639	576	564	556	518	406	958	550	791	375	650	482	1129	587	1583	222
533	R-sgRNA 12		536	GTCACAGCTCTACTACAGCA		1			no			50	2717	2434	3160	2428	2953	2356	851	2833	2914	2713	3269	3952	3009	3966	3241	3551	3682	5967	1150	1902	2267	2515	1998	2669	2652	2046	2214	3269	2504	3161	2289	2640	2576	1514	927	1858	1469
534	R-sgRNA 13		537	TCTCGCGACTGCCACATAAC		1			no			55	724	590	886	615	854	689	195	731	704	928	879	1092	645	1017	838	1015	1126	1382	266	531	680	753	518	809	735	632	572	1083	786	1042	577	880	639	1586	1103	1572	385
535	R-sgRNA 14		538	GACGGTGAAGTCGGTTGGCA		1			no			60	1674	1675	2080	1694	1955	1642	569	1882	1739	2328	2351	2725	2331	2548	2390	2427	2471	3953	887	1177	1488	1871	1515	1712	1649	1498	1484	2206	1706	2086	1314	1744	1366	2681	1293	3137	901
536	R-sgRNA 15		539	TAAAGCTTAGGGACCGGAGT		1			no			50	1046	973	1304	915	1056	969	328	1069	987	1131	1095	1478	1275	1295	1273	1320	1165	2132	459	718	843	1012	787	1106	981	814	927	990	836	1038	752	955	792	1413	751	1556	596
537	R-sgRNA 16		540	CCGTGTGCGATCCCTTCTTT		1			no			55	5862	5214	6714	5559	7002	5420	1908	6463	5850	12593	11676	13132	7314	8434	7781	9983	11233	16199	2905	4140	5377	6865	4910	5945	5981	4857	4741	8575	6088	7694	4899	6656	5173	15464	9085	18305	2797
538	R-sgRNA 17		541	AGACTCCAGCGTTGGCCAAA		1			no			55	6380	6085	8114	5941	7593	5872	2080	6809	6466	8023	8259	10123	7904	9269	8573	7773	8212	12830	2875	4659	5478	6611	5340	5645	6693	5483	4971	7262	6042	7679	5150	6718	5384	11416	6120	11876	3528
539	R-sgRNA 18		542	AGCTCTACTGTTACAAGGGG		2			no			50	1370	1295	1694	1326	1618	1216	354	1429	1223	13	22	11	1757	2211	2000	353	455	734	669	1060	1340	530	401	485	1448	1228	1159	147	175	132	892	1312	1029	147	103	140	657
540	R-sgRNA 19		543	GCTAGCTTCACTAGGGGTAA		1			no			50	24001	22891	29409	21685	28580	22275	8177	30102	27356	29970	31417	37998	31452	37756	33640	30856	31967	48604	12218	19118	22720	26435	20397	24966	26664	22340	20963	26117	19437	25226	19715	24910	21058	3325	1798	3629	14411
541	R-sgRNA 20		544	TCGGCCCTAGACTCAATATG		1			no			50	2442	2430	2946	2399	2963	2361	827	2879	2738	3227	3111	4152	3154	3538	3519	3154	3362	4765	1189	1967	2256	2775	2029	2376	2691	2354	2298	3025	2359	3022	2102	3030	2361	1436	773	1534	1545
542	R-sgRNA 21		545	GATGGGGGCCAAGTTCGTGA		1			no			60	1440	1342	1814	1377	1665	1278	442	1576	1449	1859	1792	2321	1738	2335	1782	2072	1997	3069	685	1240	1280	1545	1234	1321	1451	1278	1112	1731	1342	1666	1207	1530	1297	2857	1478	3492	767
543	R-sgRNA 22		546	GATCTGGCTCGGGACTCGTT		1			no			60	1275	1192	1633	1178	1515	1239	404	1450	1046	1581	1603	2074	1613	1796	1866	1650	1910	2726	618	919	1127	1557	1215	1395	1260	988	1107	1586	1260	1653	938	1326	1253	548	305	530	747
544	R-sgRNA 23		547	TCCGCTGCGCAAACTTCACT		1			no			55	5687	5124	6791	4108	5266	4263	1115	5466	4758	2385	2501	3151	5760	6796	6029	2687	2771	4077	2419	3782	4353	2353	1890	1798	4487	3934	3444	2668	2074	2674	2751	3686	3289	728	365	863	2440
545	R-sgRNA 24		548	TGGACCAGGTTCACCGAGTG		1			no			60	25955	23324	30457	23511	30059	23789	8693	32007	27574	36978	36879	45888	32879	41483	38453	39339	40823	61217	12441	20941	23651	30755	25224	29773	28922	23823	22372	34369	28178	34563	21876	26981	24087	37143	20903	42482	14326
546	R-sgRNA 25		549	TCTTCCCATTCGGACCCAAG		1			no			55	1815	1702	2071	1614	1925	1585	585	2317	1973	1975	2070	3018	2041	2602	2219	2788	2980	4338	845	1408	1713	2237	1644	2001	1832	1652	1447	2278	1888	2141	1716	1996	1671	262	164	309	722
547	R-sgRNA 26		550	TGTTTAGGCAGTGATCAGCC		1			no			50	697	750	901	697	960	661	194	725	772	767	813	1012	1003	1300	1142	963	1029	1637	358	629	654	956	672	863	914	715	691	906	700	1028	654	784	594	895	637	1174	309
548	R-sgRNA 27		551	GGTATCGTCGTGTCTCATTA		1			no			45	4826	4621	5763	4262	5908	4556	1485	6201	5568	6665	6480	8416	5705	7179	7016	6831	7410	10521	2333	3913	4419	5501	4451	5281	4906	4084	4164	5876	4585	6038	4162	5530	4438	7957	4111	8633	2556
549	R-sgRNA 28		552	CGCGTCCAGGTTCTTCTGGA		1			no			60	2039	1661	2233	1803	2242	1911	615	2475	2098	2673	2890	3606	2184	3053	2659	2990	3010	4256	921	1441	1791	2067	1806	2335	1953	1716	1623	2439	2074	2480	1508	2093	1826	1384	834	1836	1121
550	R-sgRNA 29		553	TGTTGGATCGTCCCTAGGAA		1			no			50	8175	7260	9574	7261	9595	7452	2572	8930	8465	7272	7721	9134	9335	11239	11008	8453	8642	13057	3734	5882	7152	8119	6165	7337	7399	6449	6212	6149	5238	6071	5025	5889	5355	2208	1431	3074	3898
551	R-sgRNA 30		554	TCTGACGATCTGTTGTGAGA		1			no			45	605	546	726	463	777	572	202	572	619	304	241	469	763	972	862	320	425	589	258	426	529	279	187	282	706	580	414	197	172	259	282	468	243	382	156	346	326
552	Plasmid Backbone		555	TGAAGAGCCATTAATGCTCTTCC		2			no			43.4783	1	1	1			1		2		3		4	2	7	3	5	4	2		2	8	4	2		5	5	4	1		3	2	2	1	12	1	4
[truncated: 239 more columns]

## Sheet: Table_S8
	Gene	alias	SgRNA	Barcode	control	strand	atg_dist	B_mismatch	dist_TSS	abs_TSS_dist	GC_content	snp_fRS1	snp_hom_fRS1	snp_fRS242	snp_hom_fRS242	snp_fRS246	snp_hom_fRS246	WT_T0_YPD_1	WT_T0_YPD_2	WT_T0_YPD_3	WT_T3_YPD_1	WT_T3_YPD_2	WT_T3_YPD_3	WT_T3_YPD_FLU_1	WT_T3_YPD_FLU_2	WT_T3_YPD_FLU_3	WT_T3_YPD_CASP_1	WT_T3_YPD_CASP_2	WT_T3_YPD_CASP_3	WT_T0_YPD_ATC_1	WT_T0_YPD_ATC_2	WT_T0_YPD_ATC_3	WT_T3_YPD_ATC_1	WT_T3_YPD_ATC_2	WT_T3_YPD_ATC_3	WT_T3_YPD_ATC_FLU_1	WT_T3_YPD_ATC_FLU_2	WT_T3_YPD_ATC_FLU_3	WT_T3_YPD_ATC_CASP_1	WT_T3_YPD_ATC_CASP_2	WT_T3_YPD_ATC_CASP_3	ARB_T0_YPD_1	ARB_T0_YPD_2	ARB_T0_YPD_3	ARB_T3_YPD_1	ARB_T3_YPD_2	ARB_T3_YPD_3	ARB_T3_YPD_FLU_1	ARB_T3_YPD_FLU_2
0	C1_00220W	PHR2	1	TTGGCTTTCCTCCCCTTAAC	0	+	112	no	-9	9	50	0	0	0	0	0	0	190	239	204	327	370	362	6	10	9	411	367	558	205	242	137	232	204	209	20	13	27	180	179	200	503	502	316	430	867	672	23	62
1	C1_00220W	PHR2	2	TCCTTGAATTTCTTGGTAGA	0	-	45	no	58	58	35	0	0	0	0	0	0	419	517	380	489	639	563	2	6	18	677	508	494	431	429	319	396	404	441	134	47	17	404	298	367	1226	1193	787	1261	1308	1513	755	3183
2	C1_00220W	PHR2	3	CGATGATTCCTTGAATTTCT	0	-	38	no	65	65	35	0	0	0	0	0	0	35	20	16	18	36	13				48	25	24	19	19	22	26	13	18		11		13	21	24	4	6	9
3	C1_00220W	PHR2	4	CAACAGTAGCAGAATTGTAC	0	+	288	no	-185	185	40	0	0	0	0	0	0	168	211	176	210	218	203	6	7	2	418	244	478	153	212	154	156	124	163	33	23	30	189	154	168	233	232	160	166	235	223	16
4	C1_00400W	SVF1	5	TTAATGTCGCTTAGTGATGG	0	-	177	no	-89	89	40	0	0	0	0	0	0	231	238	196	194	243	244	2677	4671	3398	56	59	84	220	237	185	203	242	222	2297	2209	1569	158	139	169	247	262	187	312	300	255		42
5	C1_00400W	SVF1	6	AGTTTAATGTCGCTTAGTGA	0	-	174	no	-86	86	35	0	0	0	0	0	0	659	746	634	484	643	571	42095	54385	64432	286	189	296	699	729	549	512	525	513	78030	66353	51806	474	347	404	2662	2467	1627	2803	2998	3075	346	229
6	C1_00400W	SVF1	7	ATTAACAAAGGGTAAGGATC	0	-	94	no	-6	6	35	0	0	0	0	0	0	94	98	74	65	45	53	1179	1738	1981	40	23	36	86	93	54	59	46	42	3957	2362	2329	64	44	48	876	840	594	762	551	915	3972	3975
7	C1_00400W	SVF1	8	AGTGAGTACGACAAACAAAT	0	-	219	no	-131	131	35	0	0	0	0	0	0	1770	1919	1593	1196	1194	1185	107871	147022	150950	480	345	466	1686	1921	1344	1367	1210	1451	198142	157113	117579	1120	830	996	4446	4431	3009	4712	4092	4809	1009	2470
8	C1_00450C	C1_00450C	9	CAATATACCTTTATCTTGTG	0	-	54	no	-8	8	30	0	0	0	0	0	0	8	2	5	17	8	4				16	2	17	6	6	2	12	5	7	1	8				13	92	62	57	63	42	41		20
9	C1_00450C	C1_00450C	10	ATGGCTAAATGACGAATTCA	0	+	288	no	-242	242	35	0	0	0	0	0	0	538	563	526	658	730	683	2	8	5	725	650	721	526	552	409	568	473	632	68	41	12	411	365	402	1123	1146	685	1081	1219	1316	789	1239
10	C1_00450C	C1_00450C	11	TGTCTCTGTCTCTAGCTTTC	0	-	233	no	-187	187	45	0	0	0	0	0	0	710	747	633	836	866	824	10	17	7	881	668	788	674	716	529	722	711	781	92	57	52	599	465	728	1952	1973	1256	2229	1777	2282	2094	1965
11	C1_00450C	C1_00450C	12	TGAAAAACCTCACAAGATAA	0	+	64	no	-18	18	30	0	0	0	0	0	0	1103	1207	1017	1089	1309	1212	22	27	49	1871	1257	1352	1062	1168	915	1037	1013	1025	132	92	70	941	747	916	3183	3122	2163	3756	3266	3864	6104	7888
12	C1_00510W	C1_00510W	13	CATTGTATTTCGTTCATCCT	0	+	157	no	-93	93	35	0	0	0	0	0	0	86	93	74	88	101	96	6	1	1	202	143	99	90	122	60	94	75	114	3	8	9	76	65	74	362	366	260	375	325	493		4
13	C1_00510W	C1_00510W	14	ATCTCGTTCCCCAACAAGTT	0	+	133	no	-69	69	45	0	0	0	0	0	0	882	944	767	161	180	176	87	139	160	710	644	562	945	976	672	520	576	703	553	435	239	460	354	520	1140	1051	769	1158	787	1205	648	1495
14	C1_00510W	C1_00510W	15	TCTCGTTCCCCAACAAGTTA	0	+	132	no	-68	68	45	0	0	0	0	0	0	1475	1688	1359	187	180	206	202	318	299	923	596	610	1411	1609	1120	979	924	989	929	761	636	757	697	776	4877	4549	3015	4559	4647	5300	11872	9934
15	C1_00510W	C1_00510W	16	TGTTGGGGAACGAGATTCCG	0	-	137	no	-73	73	55	0	0	0	0	0	0	3120	3591	2979	5334	5950	5422	98	94	54	5878	4658	5565	3024	3467	2624	3219	3301	3649	430	289	297	2889	2580	3000	2865	2706	1831	3265	3303	3112	1823	1969
16	C1_01070C	KRP1	17	CATATGTTTCCAATAGTATC	0	-	197	no	-90	90	30	0	0	0	0	0	0	5	11	7										24	9	11							3		1	159	161	102	55	86	112	3	5
17	C1_01070C	KRP1	18	GTATGGGTATTCAAAGTTGT	0	-	63	no	44	44	35	0	0	0	0	0	0	592	725	503	769	924	903	5	14	8	890	609	750	562	629	483	617	594	626	68	49	42	512	461	623	204	209	130	128	102	149	1
18	C1_01070C	KRP1	19	TGTATGGGTATTCAAAGTTG	0	-	62	no	45	45	35	0	0	0	0	0	0	3010	3245	2609	3789	4101	4056	21	49	75	4218	3179	3557	2945	3219	2354	3076	2924	3131	444	433	216	2728	2289	2666	3653	3632	2532	3898	3773	3828	1788	2947
19	C1_01070C	KRP1	20	ATATAAGAACCCGATACTAT	0	+	209	no	-102	102	30	0	0	0	0	0	0	8	21	7		1								10	4	5									2	27	41	19			1
20	C1_01600W	MRP20	21	ATCTTGAAGGGAGGAGTAGA	0	+	252	no	-223	223	45	0	0	0	0	0	0	1094	1138	1004	973	1018	1027	12	33	33	1055	787	1030	974	1099	862	1000	983	1126	301	159	169	934	751	952	3168	2921	1769	3156	3147	3481	1119	530
21	C1_01600W	MRP20	22	TTGAAGGGAGGAGTAGAAGG	0	+	249	no	-220	220	50	0	0	0	0	0	0	1366	1606	1277	792	875	784	53	103	83	1191	949	1135	1323	1499	1090	1324	1307	1513	167	178	124	1250	920	1201	1494	1401	970	1441	1551	1491	2003	1566
22	C1_01600W	MRP20	23	GAGGAGTAGAAGGTGGTGCA	0	+	242	no	-213	213	55	0	0	0	0	0	0	296	318	299	128	158	138	2		1	157	124	162	255	322	245	308	268	302	19	11	25	259	171	266	922	973	619	791	677	785	1344	1913
23	C1_01600W	MRP20	24	GTGGTGCAAGGTTGATTGAA	0	+	230	no	-201	201	45	0	0	0	0	0	0	604	576	511	200	171	174	4	4	2	182	110	209	529	558	446	500	514	605	55	27	36	480	416	423	488	433	272	360	273	359	1541	730
24	C1_01950C	C1_01950C	25	ATACTTGAGGTAGTGTATGG	0	+	142	no	-115	115	40	0	0	0	0	0	0	1007	1197	913	185	232	207	105	169	121	30	32	21	959	1079	777	759	823	770	174	115	88	676	359	578	1137	1036	699	441	383	676	231	297
25	C1_01950C	C1_01950C	26	CGACGATCGACTTCCGTCTC	0	+	221	no	-194	194	60	0	0	0	0	0	0	4	13	9	6	10	10				2	8		7	10	3	2	2	7				6	3	9	15	13	12	2	11	10	2
26	C1_01950C	C1_01950C	27	CTCAGGATTGTCGTGCATTC	0	+	204	no	-177	177	50	0	0	0	0	0	0	488	552	459	681	664	714	10	7	2	1007	879	914	458	552	418	551	473	615	84	59	43	454	484	509	232	229	142	344	194	289		20
27	C1_01950C	C1_01950C	28	GATTGTCGTGCATTCCGGCT	0	+	199	no	-172	172	55	0	0	0	0	0	0	254	243	226	312	312	323	5	12	3	196	236	218	247	306	200	229	274	273	17	36	14	232	223	239	647	600	433	708	615	745	18	121
28	C1_02420C	GSC1	29	ATATTTAAAAAAAAAGAAGG	0	-	61	no	312	312	15	0	0	0	0	0	0	23	30	32	1	2				5	24	17	19	19	36	35	32	32	32				8	23	23	7	9	6			3
29	C1_02420C	GSC1	30	TTAGTATATCAGTTGGGTGT	0	-	32	no	341	341	35	0	0	0	0	0	0	651	725	575	672	720	736	69	85	57	508	342	448	598	656	471	527	642	625	135	165	166	465	523	556	725	602	441	874	634	822	28	1
30	C1_02420C	GSC1	31	GATAAGTTAGTATATCAGTT	0	-	26	no	347	347	25	0	0	0	0	0	0	323	333	266	374	499	266	4	13	1	184	117	167	274	349	239	298	356	300	34	16	20	246	203	244	825	818	534	1055	1012	997	275	131
31	C1_02420C	GSC1	32	AGATAAGTTAGTATATCAGT	0	-	25	no	348	348	25	0	0	0	0	0	0	201	269	172	162	159	154	2	2	2	110	95	93	216	229	152	159	146	192	38	29	7	134	109	134	878	883	527	834	691	1075	406	99
32	C1_02510W	C1_02510W	33	TGAACTTAGAGTCCGTATAC	0	+	144	no	-83	83	40	0	0	0	0	0	0	688	854	713	188	150	199	2	17	4	453	357	311	693	811	548	759	796	783	40	17	26	661	510	626	2424	2496	1580	1509	1393	1682	1655	1508
33	C1_02510W	C1_02510W	34	ATTGACGTGTTCATAAAATG	0	-	163	no	-102	102	30	0	0	0	0	0	0	100	95	102	67	64	80	3	1	4	100	74	82	103	99	68	75	88	95	14	4	2	61	61	67	382	432	276	596	412	577	2	68
34	C1_02510W	C1_02510W	35	AGTTACGATCTTTGTTGTTG	0	-	26	no	35	35	35	0	0	0	0	0	0	2328	2623	2101	2927	3409	3429	16	44	185	3570	2927	3260	2250	2624	1842	2288	2417	2559	367	190	150	2222	1760	2262	3148	3148	2173	3060	3143	3459	5754	8995
35	C1_02510W	C1_02510W	36	ATATTGAAGGGGTTGGTTAT	0	-	280	no	-219	219	35	0	0	0	0	0	0	178	181	164	179	193	191		2		301	194	210	155	177	151	167	137	182	22	19	2	151	106	170	1251	1113	735	1505	1676	1472	252	561
36	C1_02620C	HOM6	37	CTACTGTTGTTGTTGCGTCT	0	+	168	no	-138	138	45	0	0	1	0	1	1	2	8	5										2	1											115	126	62	98	62	53	191	2
37	C1_02620C	HOM6	38	TACTGTTGTTGTTGCGTCTG	0	+	167	no	-137	137	45	0	0	0	0	0	0	1792	2071	1644	2494	2565	2917	16	31	26	3073	2602	2803	1705	1939	1387	1869	1831	1882	209	143	111	1671	1358	1674	1678	1576	1089	1779	1539	1953	431	1008
38	C1_02620C	HOM6	39	TGCGTCTGGGGCGCCTTTAC	0	+	155	no	-125	125	65	0	0	0	0	0	0	441	525	468	530	535	604	17	8	13	729	566	600	454	537	362	427	417	475	67	39	29	370	469	415	853	747	555	961	973	1210	257	322
39	C1_02620C	HOM6	40	ACTCCTTCCGATCTTGTTAC	0	-	133	no	-103	103	45	0	0	0	0	0	0	2228	2568	2110	1754	1663	1887	36	53	63	716	618	613	2112	2416	1755	1301	1294	1307	248	176	123	869	542	819	1767	1787	1176	2135	2103	2306	308	55
40	C1_02660C	MGM101	41	TGATAAATTACACAGCTTTA	0	+	151	no	-96	96	25	0	0	0	0	0	0	2724	2919	2419	3336	3897	3911	61	104	62	5519	3926	4961	2549	2907	2136	2799	2847	2865	430	278	214	2734	2296	2613	4373	4586	2940	5005	5291	5913	1758	1863
41	C1_02660C	MGM101	42	TAAATTACACAGCTTTAAGG	0	+	148	no	-93	93	30	0	0	0	0	0	0	468	485	407	83	103	94	2	7	3	194	151	229	468	485	350	386	343	356	58	31	23	350	310	356	1767	1724	1197	934	877	1100	1567	1935
42	C1_02660C	MGM101	43	TAAGGTGGTGTCTAACATCT	0	+	133	no	-78	78	40	0	0	0	0	0	0	257	305	227	31	41	45		1	3	123	105	87	211	286	213	235	194	242	53	15	12	141	151	197	533	507	318	452	332	390	24	37
43	C1_02660C	MGM101	44	AATAACAAATGAGTTGGCGA	0	-	49	no	6	6	35	0	0	0	0	0	0	805	857	744	276	317	332	24	8	41	558	499	458	761	858	550	703	713	724	173	36	58	580	476	536	2131	2199	1463	1994	1732	1888	2276	3013
44	C1_02960C	C1_02960C	45	TGATTGTTATAGAACAATGG	0	-	202	no	-136	136	30	0	0	0	0	0	0	269	327	236	173	196	200	1	15	19	53	43	80	233	341	196	254	287	302	70	35	24	226	205	219	639	636	469	656	452	509	176	534
45	C1_02960C	C1_02960C	46	CTTTGATTGTTATAGAACAA	0	-	199	no	-133	133	25	0	0	0	0	0	0			2	1	2			1					2	3	2										71	90	89	99	114	67
46	C1_02960C	C1_02960C	47	AAAAGAATCATTAACGGGGA	0	+	56	no	10	10	35	0	0	0	0	0	0	1234	1257	1093	850	749	861	2			185	109	191	1134	1300	989	998	1130	1065	26	12	8	881	682	839	1914	1919	1281	1301	1234	1386	539	2274
47	C1_02960C	C1_02960C	48	AAAGAATCATTAACGGGGAT	0	+	55	no	11	11	35	0	0	0	0	0	0	3269	3776	3030	4515	4674	4622	59	131	181	5681	4887	5059	3112	3641	2682	3526	3431	3745	663	334	303	3182	2846	3265	1937	2039	1290	2105	2288	2251	1826	2082
48	C1_03280W	C1_03280W	49	TCTTGCCTATAAGTTGAAGA	0	+	177	no	-126	126	35	0	0	0	0	0	0	807	827	688	485	489	547	3	6	9	528	355	454	723	804	556	822	711	783	69	37	20	723	553	694	1764	1744	1168	1951	1773	1991	1088	1260
49	C1_03280W	C1_03280W	50	CTTGCCTATAAGTTGAAGAA	0	+	176	no	-125	125	35	0	0	0	0	0	0	68	57	57	3		1	13	1	30	8	12	3	71	50	44	64	29	31	9	22	11	36	48	29	33	33	29	2	19	7	8	43
50	C1_03280W	C1_03280W	51	AAGGGAAACAAAAAGTAGTG	0	+	158	no	-107	107	35	0	0	0	0	0	0	2611	2899	2287	789	756	761	508	970	910	1795	1414	1369	2585	2876	2139	2318	2347	2534	495	301	280	2186	1871	2070	4988	4662	3158	4198	4079	4790	2632	2358
51	C1_03280W	C1_03280W	52	ATAGGCATACGTACTAACAG	0	-	252	no	-201	201	40	0	0	0	0	0	0	444	465	394	100	116	124	1		2	464	382	376	462	491	374	402	424	441	10	20	5	371	265	395	540	545	330	257	357	268	98	164
52	C1_03380W	TPS2	53	TAACAGATTCGAAGGTTCGC	0	-	203	no	-151	151	45	0	0	0	0	0	0	631	768	622	746	794	884	7	15	15	792	646	757	579	664	471	634	724	665	66	54	46	707	432	666	1023	951	619	1163	1241	1473	1455	381
53	C1_03380W	TPS2	54	TTACATATGGCGTGCCCCCT	0	+	272	no	-220	220	55	0	0	0	0	0	0	35	41	32	47	50	42				23	29	40	51	40	29	36	35	33	8	11	2	29	26	32	2598	2403	1601	2846	2745	3298	128	521
54	C1_03380W	TPS2	55	GTACCGACAATTGATATTTA	0	-	119	no	-67	67	30	0	0	0	0	0	0	561	601	544	617	755	743	4	16	6	515	384	669	555	650	443	586	567	613	82	52	38	437	416	458	1619	1562	1027	1646	1586	1782	1124	1293
55	C1_03380W	TPS2	56	AAACGAAAGTCAACTAAAAA	0	-	77	no	-25	25	25	0	0	0	0	0	0	351	342	294	391	502	369	5	7	3	614	363	455	306	350	281	272	313	315	50	35	23	294	209	289	559	533	362	422	546	526	138	4
56	C1_03980W	SPC19	57	TAATAAGATGATATTGTGTG	0	-	91	no	3	3	25	0	0	0	0	0	0	78	100	71	2	4	4	1	9	6	27	8	21	67	135	72	76	90	72	5	6	4	86	77	68	423	389	248	299	360	235	1429	2696
57	C1_03980W	SPC19	58	TTGAAAAAGGTCTAAGTAGA	0	-	63	no	31	31	30	0	0	0	0	0	0	234	249	172	232	294	248	1	20	3	289	197	315	178	219	148	216	234	210	25	4	28	156	158	173	581	581	404	668	473	730	1828	1853
58	C1_03980W	SPC19	59	ATATATGTATTAATTGAAAA	0	-	50	no	44	44	10	0	0	0	0	0	0	97	138	72	103	112	124	2		4	205	112	114	90	108	71	100	105	92	6	9	15	107	78	92	196	211	142	265	201	281		57
59	C1_03980W	SPC19	60	TATATCTATGTGTATCTTAA	0	-	21	no	73	73	20	0	0	0	0	0	0	2263	2319	1977	2728	2976	3033	53	55	34	3102	2491	2891	2039	2363	1677	2285	2366	2329	327	213	194	2126	1847	2043	1650	1684	1104	1733	1733	1585	1707	2254
60	C1_05500W	RSM22	61	TAAGACACAAAAGTGGAAAC	0	+	94	no			35	1	0	1	0	1	1	90	107	103	25	24	12	4	87	5	30	19	20	95	118	100	83	67	85	63	15	6	71	41	75	709	652	460	261	267	277	316	575
61	C1_05500W	RSM22	62	ACACAAAAGTGGAAACAGGA	0	+	90	no			40	0	0	0	0	0	0	466	530	431	5	4	2	9	5	15	33	18	20	457	508	353	181	153	156	25	101	75	105	130	122	689	644	485	12	21	31	603	898
62	C1_05500W	RSM22	63	GTCGTTGTTTCTCATTTGGT	0	+	209	no			40	0	0	0	0	0	0	1192	1256	1111	1544	1726	1635	20	43	35	2215	1515	1660	1099	1199	863	1287	1282	1270	159	54	48	1133	974	1121	646	632	387	578	455	676	1091	149
63	C1_05500W	RSM22	64	TCTCATTTGGTTGGTTGGTC	0	+	200	no			45	0	0	0	0	0	0	80	78	43	57	91	84		1	4	128	60	68	46	58	66	95	49	97	4	2	7	70	54	53	262	329	189	332	225	329	978	349
64	C1_05560W	RIB4	65	ATAAAACATATCATCATAAC	0	+	273	no	427	427	20	0	0	0	0	0	0	375	466	391	562	603	641	2	5	6	731	413	539	358	396	351	436	500	523	37	53	31	447	277	328	519	535	365	689	784	710	141	128
65	C1_05560W	RIB4	66	TTCTTCGTTGTCGTCGTTGT	0	+	64	no	636	636	45	0	0	0	0	0	0	747	827	718	852	991	907	3	23	8	712	661	749	722	831	628	676	698	734	83	75	54	669	527	621	591	563	371	613	506	735	30	302
66	C1_05560W	RIB4	67	TTCACATGCTTATATACAGG	0	-	27	no	673	673	35	3	0	3	0	0	0	417	516	381	147	165	146	11	8	4	451	467	320	433	494	346	456	483	533	50	35	30	414	404	443	1480	1636	952	1061	1151	1236	11153	10985
67	C1_05560W	RIB4	68	GTGTTCACATGCTTATATAC	0	-	24	no	676	676	35	0	0	0	0	0	0	19	33	28	10	1	3				11	6	6	20	29	20	15	22	18	3	14		9	9	29	5	6	3
68	C1_05780W	RSC9	69	CCAAGATGCATAGCTCTTGA	0	+	274	no	-184	184	45	1	0	1	0	1	1	12	41	15	6	36	22				20	16	27	19	31	20	23	12	34	12	1		11	26	10	124	112	79	92	73	95
69	C1_05780W	RSC9	70	TATGCATCTTGGCTGAGTAT	0	-	282	no	-192	192	40	0	0	0	0	0	0	4342	4720	4143	5232	5773	5530	66	92	74	7634	6273	7077	4237	4652	3327	4538	4667	4905	574	344	358	4069	3570	4318	738	837	478	785	742	862	280	575
70	C1_05780W	RSC9	71	CCATCAAGAGCTATGCATCT	0	-	271	no	-181	181	45	0	0	0	0	0	0	910	1053	852	1144	1259	1214	15	18	62	1248	1082	1169	815	956	737	907	832	1067	238	88	92	865	741	850	1257	1247	815	1166	1689	1419	774	1202
71	C1_05780W	RSC9	72	CATATTGCAAAATATTGACA	0	+	204	no	-114	114	25	0	0	0	0	0	0	82	87	72	93	113	54	6	8	5	198	225	110	96	113	57	90	109	98	19	23	6	93	87	108	366	372	243	230	348	357	17	1
72	C1_06230C	MDM34	73	CTAACGGGTTATTCGTACTT	0	+	57	no	238	238	40	0	0	0	0	0	0	374	489	359	545	561	711	1	12		613	628	512	408	450	293	413	432	379	68	50	26	311	330	390	578	497	353	626	610	729	1	5
73	C1_06230C	MDM34	74	TACGAATAACCCGTTAGAAT	0	-	60	no	235	235	35	0	0	0	0	0	0	308	340	278	176	205	135	7	1	2	246	157	221	301	349	252	136	165	121	22	2	22	176	105	112	1257	1198	830	1486	1359	1565	1095	524
74	C1_06230C	MDM34	75	AAAAGTGTGCAAAAAGCTAT	0	-	19	no	276	276	30	0	0	0	0	0	0	366	423	350	402	471	457	2	10	8	500	617	436	368	427	274	337	326	421	62	29	15	322	263	324	331	322	218	190	244	340	100	186
75	C1_06230C	MDM34	76	TATATTTGAATCTACCACTT	0	+	229	no	66	66	25	0	0	0	0	0	0	1850	2087	1660	2385	2661	2501	206	413	171	3159	2531	2823	1809	2053	1392	2007	2083	1920	653	305	448	1823	1542	1775	2176	2173	1402	2674	2330	2562	1499	2246
76	C1_06850W	PCL7	77	AGACCATTATCACAGCTATT	0	+	269	no	337	337	35	0	0	0	0	0	0	2204	2378	1914	1727	2009	1860	489	874	747	3071	2568	2637	2175	2407	1616	1896	1905	2095	533	408	308	1676	1566	1862	6630	6486	4168	5513	5790	6293	1601	2872
77	C1_06850W	PCL7	78	GTATGTTTCTATTATAATGG	0	-	27	no	579	579	25	0	0	0	0	0	0	345	363	294	247	280	276	20	15	23	82	55	96	357	347	272	335	356	410	112	52	64	301	243	274	317	310	213	248	229	332	32	58
78	C1_06850W	PCL7	79	TTTGTATGTTTCTATTATAA	0	-	24	no	582	582	15	0	0	0	0	0	0	39	39	37	47	47	34		3	4	41	48	55	31	36	29	31	36	24	26	36	18	23	17	28	186	191	132	223	282	232	2	29
79	C1_06850W	PCL7	80	ATACCGAATAGCTGTGATAA	0	-	263	no	343	343	35	0	0	0	0	0	0	1370	1484	1239	1537	1716	1752	13	48	31	2012	1547	1856	1353	1527	1031	1414	1387	1362	255	149	84	1359	1057	1319	2453	2483	1662	2178	2523	2909	265	1235
80	C1_07240W	YPD1	81	GCAGTGATAACCAATCAAGA	0	+	85	no	62	62	40	0	0	0	0	0	0	696	798	629	678	792	694	19	25	89	583	480	621	680	753	538	627	631	669	89	145	53	506	485	448	2052	1993	1262	2526	2124	2441	1765	2995
81	C1_07240W	YPD1	82	CAATGTAGTGCCGTCTTGAT	0	-	72	no	75	75	45	0	0	0	0	0	0	25	38	18	13	28	26				26	23	43	29	27	21	17	27	38	3			5	16	13	250	242	127	254	108	324	39
82	C1_07240W	YPD1	83	AAAGTTCTTGGAATACTAAG	0	+	36	no	111	111	30	0	0	0	0	0	0	365	380	292	153	174	156	4	7	31	244	164	158	357	368	262	397	353	371	32	25	27	312	221	261	770	727	487	957	817	875	460	771
83	C1_07240W	YPD1	84	TGTTAGCGCCAAAGAAAAAG	0	-	227	no	-80	80	40	3	0	3	0	3	0	1367	1502	1147	890	992	863	57	91	98	1556	1210	1203	1275	1372	996	1141	1084	1213	310	235	175	928	870	909	2718	2660	1850	1683	1497	2038	1623	1893
84	C1_07600W	ATP7	85	ATAGGTGTCACGTGAAACAG	0	+	278	no	-216	216	45	0	0	0	0	0	0	1161	1334	1009	226	216	227	3	11	7	939	729	686	1103	1321	918	1095	1078	1140	26	11	18	985	837	965	1271	1248	827	589	486	663	1908	2446
85	C1_07600W	ATP7	86	ATGGTTGTAAGAATTTGTGT	0	-	62	no	0	0	30	0	0	0	0	0	0	2677	2955	2347	3676	4238	4143	73	102	69	4545	3903	4128	2409	2794	2057	2460	2444	2651	304	175	170	2174	2097	2259	6386	5980	4224	641	602	752	1935	3926
86	C1_07600W	ATP7	87	GGATATTGCTATTGAAGATG	0	-	31	no	31	31	35	0	0	0	0	0	0	382	446	405	159	114	137	26	23	78	273	252	208	361	395	293	335	306	341	41	44	26	308	244	298	1248	1171	757	957	818	861	10211	8538
87	C1_07600W	ATP7	88	AAATCTATGTCGTGTAGAAA	0	+	235	no	-173	173	30	0	0	0	0	0	0	56	73	66	64	87	86				80	83	72	50	70	37	53	37	71	33	13		48	38	52	411	414	267	462	524	564	16	12
88	C1_07910C	MRPL3	89	AAGCTGGAACAAATGTGAGA	0	+	175	no	-31	31	40	0	0	0	0	0	0	339	371	325			1	74	77	72	3			311	399	297	7	7	22	12	286	161	3	9	7	260	249	195	196	156	91	251	484
89	C1_07910C	MRPL3	90	TTTAGTCTTACCACTGGAAA	0	+	46	no	98	98	35	0	0	0	0	0	0	72	66	59	90	54	91		32	12	45	40	37	60	91	50	65	75	35	21	21	12	46	36	66	603	539	404	771	672	766	1	59
90	C1_07910C	MRPL3	91	TTAGTCTTACCACTGGAAAG	0	+	45	no	99	99	40	3	0	3	0	3	0	181	184	143	194	195	218	7	7	1	120	62	136	174	166	145	215	186	221	15	15	23	194	108	171	74	75	44	20	39	32
91	C1_07910C	MRPL3	92	TTCCAGTGGTAAGACTAAAA	0	-	47	no	97	97	35	3	0	3	0	3	0	234	324	248	222	227	296	3	12	2	260	186	249	269	295	183	271	238	240	31	20	6	200	176	218	180	187	148	292	141	260	20	1
92	C1_08920W	C1_08920W	93	TTCTTCCTTCGATTACCCAT	0	-	85	no	-48	48	40	3	0	3	0	3	0	34	50	29								1	4	39	27	26	1	3	1		24	7	4			619	653	428	36	42	28	3635	4582
93	C1_08920W	C1_08920W	94	TTATGTGGTTATTGTTGGGG	0	-	50	no	-13	13	40	0	0	0	0	0	0	367	463	317	6	5	15	16	18	24	38	55	22	313	291	260	264	297	321	74	31	18	230	184	250	509	471	341	75	93	109	1219	1927
94	C1_08920W	C1_08920W	95	GTTGTGGACTGTTGATTATG	0	-	35	no	2	2	40	0	0	0	0	0	0	1511	1706	1458	812	808	786	34	52	59	1666	1552	1339	1443	1748	1211	1382	1424	1499	205	139	86	1346	1134	1344	681	670	502	829	637	920	1629	2180
95	C1_08920W	C1_08920W	96	GTGGGGTAAGGGGGTGGTTG	0	-	19	no	18	18	65	0	0	0	0	0	0	460	482	441	339	304	377	8	11	11	593	525	446	439	480	341	337	455	449	27	40	45	360	304	363	1590	1552	996	1679	1384	1522	1008	627
96	C1_09030C	COX5	97	TTGAATACTTGTTGGGGGAG	0	-	11	no	431	431	45	0	0	0	0	0	0	552	621	513	691	773	817	9	6	21	954	606	856	495	583	398	522	631	607	116	70	72	521	391	445	614	598	408	761	569	730	327	346
97	C1_09030C	COX5	98	TAGTTAGTGGGATTTGGTAC	0	-	154	no	288	288	40	0	0	0	0	0	0		3											2												27	50	15	52	23	19
98	C1_09030C	COX5	99	TAAAATTAGTTAGTGGGATT	0	-	148	no	294	294	25	0	0	0	0	0	0	724	772	628	815	970	924	1	15	17	1176	815	867	695	758	563	778	757	808	60	29	25	723	608	618	703	645	498	788	740	890	1366	1572
99	C1_09030C	COX5	100	GATTGGTTAAAATTAGTTAG	0	-	141	no	301	301	25	0	0	0	0	0	0	373	394	351	421	416	401	3	3	5	428	363	370	368	372	324	434	341	369	35	22	15	353	310	320	402	363	280	504	564	542	210	306
100	C1_09450C	NUP188	101	AGACGTGGAAACTAGTAAAA	0	+	16	no	54	54	35	0	0	0	0	0	0	2626	2868	2464	3212	3408	3526	21	61	20707	3932	2761	3565	2688	2981	2141	2821	2663	2837	365	248	176	2549	2209	2551	2010	1982	1314	2235	2375	2497	543	482
101	C1_09450C	NUP188	102	GTATTTATTCGCAACACGCC	0	+	263	no	-193	193	45	0	0	0	0	0	0	35	52	26	10	1	1		5		18	27	16	41	40	38	21	17	26	3		2	27	25	15	165	144	85	19	72	52	3	2
102	C1_09450C	NUP188	103	ACTAGTTTCCACGTCTTAAT	0	-	20	no	50	50	35	0	0	0	0	0	0	619	733	650	699	854	865	14	31	31	829	609	670	570	688	447	516	653	625	87	86	42	513	476	528	2025	2253	1459	2594	2465	2497	445	1177
103	C1_09450C	NUP188	104	TCTTTGATGGTTTAACTTCC	0	-	242	no	-172	172	35	0	0	0	0	0	0	321	323	295	119	115	88	16	11	2	164	159	166	307	329	256	244	231	275	102	36	22	220	178	208	620	626	405	63	76	60	2038	1682
104	C1_09960W	PET100	105	AGGGGAAACTAAGTTTAGTT	0	-	68	no	-35	35	35	0	0	0	0	0	0	4163	4494	3622	2163	1973	2222	145	371	286	3740	3199	3292	4014	4444	3159	3767	3622	4056	497	302	199	3418	2922	3346	9157	9290	6225	3930	3784	4268	7826	9711
105	C1_09960W	PET100	106	CCAATTTATTGCCGCTGTTA	0	+	228	no	-195	195	40	0	0	0	0	0	0	4292	4942	4090	6746	6964	7108	84	157	131	6558	4815	6357	4263	4734	3533	5001	4793	5263	821	412	348	4470	3804	4731	1355	1296	862	1550	1254	1728	475	791
106	C1_09960W	PET100	107	CCTTAACAGCGGCAATAAAT	0	-	225	no	-192	192	40	0	0	0	0	0	0	54	111	78	86	105	116		2		84	99	87	58	69	55	53	53	55	9	20	6	49	56	62	409	394	264	529	373	432	1	10
107	C1_09960W	PET100	108	CACAATAGTTACCTTAACAG	0	-	214	no	-181	181	35	0	0	0	0	0	0	231	242	219	111	171	125	9	5	26	344	318	251	221	261	198	202	220	219	47	13	12	186	167	192	894	900	587	551	485	570	305	214
108	C1_10960W	C1_10960W	109	TGTCCGTTAGATTCCTGATG	0	+	169	no	-137	137	45	0	0	0	0	0	0	746	808	701	113	101	97	216	307	267	213	163	147	643	755	525	235	273	232	757	516	540	202	132	200	3644	3413	2269	790	643	794	431	439
109	C1_10960W	C1_10960W	110	CAACCTCATCAGGAATCTAA	0	-	163	no	-131	131	40	0	0	0	0	0	0	46	39	22	36	41	21	4	19	11	44	49	37	37	46	48	22	25	27	47	56	54	39	24	36	261	237	163				22	28
110	C1_10960W	C1_10960W	111	GGTGGTTGTTTATGGATTGA	0	-	26	no	6	6	40	0	0	0	0	0	0	1164	1181	916	955	945	1068	3239	4670	4800	953	741	867	1050	1155	791	1120	990	1120	11397	5818	4340	962	806	952	2118	1945	1375	2015	1793	2277	3082	2225
111	C1_10960W	C1_10960W	112	GTTTGAAGGGTGGTTGTTTA	0	-	18	no	14	14	40	0	0	0	0	0	0	321	352	308	408	445	442	4	17	8	425	403	399	319	355	277	270	335	336	78	72	69	295	200	296	1345	1213	824	1246	1238	1425	1224	1444
112	C1_11240C	CHO1	113	AAGAAGAGCTGAATGTGAGG	0	-	44	no	12	12	45	0	0	0	0	0	0		1
113	C1_11240C	CHO1	114	TGGAAGAAGAGCTGAATGTG	0	-	41	no	15	15	45	0	0	0	0	0	0	3	5	3										2	6	1		4	1							2	7	12	10
114	C1_11240C	CHO1	115	TATGTGTGGAGTAAGAAAAG	0	-	21	no	35	35	35	0	0	0	0	0	0	1387	1511	1248	1538	1648	1645	37	48	27	1449	1078	1355	1322	1445	1072	1352	1341	1524	262	141	135	1206	1037	1115	4437	4152	2827	4808	4427	4812	3372	5707
115	C1_11240C	CHO1	116	CCTTAAGGCAAAATTACAAT	0	-	243	no	-187	187	30	0	0	0	0	0	0	363	434	311	401	461	399	3	8	3	456	282	425	352	392	282	345	346	294	82	49	45	304	289	326	1875	1760	1235	1976	1780	2071	9	142
116	C1_11500C	ARO7	117	GAATTGTAATAGCTTTATTG	0	-	30	no	28	28	25	0	0	0	0	0	0	237	277	203	314	345	381	2	4	5	392	341	254	224	303	211	229	242	231	42	22	15	242	198	200	2309	2195	1513	4189	4653	4429	570	104
117	C1_11500C	ARO7	118	TACGTTGATTTCGAAATCCC	0	+	232	no	-174	174	40	0	0	0	0	0	0	157	152	137	148	175	185		5		225	160	168	150	166	112	124	124	124	20	14	4	134	94	121	311	309	225	440	355	339		5
118	C1_11500C	ARO7	119	ACGTTGATTTCGAAATCCCG	0	+	231	no	-173	173	45	1	0	1	1	1	0	175	209	186	216	240	217	11	5	2	232	203	222	194	253	103	179	213	201	27	25	6	179	127	170	239	184	131	221	129	214	615	513
119	C1_11500C	ARO7	120	GTTCAATATATACATTACCC	0	-	211	no	-153	153	30	1	0	1	1	1	0	8	12	3										6	2	1										315	309	227	445	407	566	6	7
120	C1_12260W	VPH2	121	TCGCATTAGACGAGAGATTC	0	+	108	no	-19	19	45	1	0	1	1	1	0	97	96	88	104	132	127		1	2	116	103	123	94	105	76	133	94	85	12	14	9	61	59	80	183	180	122	336	236	219	84	68
121	C1_12260W	VPH2	122	CGCATTAGACGAGAGATTCA	0	+	107	no	-18	18	45	0	0	0	0	0	0	2505	2712	2341	1366	1298	1388	286	476	477	1222	875	1091	2274	2571	2026	1819	1894	1980	141	62	98	1363	972	1362	7285	7151	4619	3358	3124	3416	568	1144
122	C1_12260W	VPH2	123	ATGAGGCTAGATTTGATTAA	0	-	27	no	62	62	30	0	0	0	0	0	0	1397	1547	1250	1594	1661	1653	11451	814	688	1779	1390	1658	1292	1488	1053	1480	1361	1426	234	101	100	1232	992	1243	3631	3495	2400	3897	3984	4320	720	1260
123	C1_12260W	VPH2	124	GTTGCTATAAATAATAATAA	0	-	269	no	-180	180	15	0	0	0	0	0	0	84	87	67	109	114	122		2	1	117	60	114	93	73	60	67	134	75	6	7	6	81	68	76	179	214	159	265	255	264	16	3
124	C1_12360C	RIB3	125	TATTAAATAACACAAACTAG	0	-	142	no	73	73	20	0	0	0	0	0	0	1161	1366	1009	831	814	819	9	38	37	2233	1639	1654	1087	1265	787	1429	1447	1464	204	126	94	1329	1043	1339	648	579	423	601	625	569	162	187
125	C1_12360C	RIB3	126	TGTATTAAATAACACAAACT	0	-	140	no	75	75	20	0	0	0	0	0	0	1246	1243	1065	1469	1589	1516	6	20	19	1396	1244	1329	1186	1299	946	1199	1245	1254	151	73	83	1014	877	1117	2569	2653	1637	3099	2807	3233	723	2623
126	C1_12360C	RIB3	127	TATATATAAAGAAAGGGAGT	0	-	14	no	201	201	25	0	0	0	0	0	0	977	978	804	720	746	895	12	22	15	1660	1367	1167	923	1113	737	955	923	931	107	72	47	809	693	834	1099	1185	822	1047	1019	1177	2849	3250
127	C1_12360C	RIB3	128	AAAGATCAGTTATATTTGTA	0	-	239	no	-24	24	20	0	0	0	0	0	0	343	342	299	321	370	419	6	9	1	559	483	536	300	390	238	295	327	330	20	9	10	313	264	300	941	928	580	1168	898	1113	334	66
128	C1_12610W	C1_12610W	129	AATTTGAGGAATAATAATAT	0	-	131	no	-88	88	15	0	0	0	0	0	0	93	87	71	42	38	27	24	50	8	145	83	95	86	81	56	71	68	60	65	85	38	49	29	54	51	73	37	39	11	54	13
129	C1_12610W	C1_12610W	130	AGAAAGAACAAATGAATTTG	0	-	117	no	-74	74	25	1	0	1	1	1	0	4065	4551	3615	671	707	628	17399	24778	24218	1592	1196	1209	3810	4365	3130	3022	3030	3047	427	622	624	2573	2169	2654	2497	2562	1679	1747	1784	1819	1925	2052
130	C1_12610W	C1_12610W	131	GTGATAATGTTATATGTTGT	0	-	28	no	15	15	25	1	0	1	1	1	0	152	160	136	96	58	92	30	6	3	131	104	111	158	149	124	153	133	162	31	12	3	167	110	92	389	352	211	509	456	486	5	11
131	C1_12610W	C1_12610W	132	TGAGATGAGATTGAATATGA	0	+	213	no	-170	170	30	0	0	0	0	0	0	1080	1068	901	208	221	222	14	26	18	205	198	221	924	1146	799	493	480	469	72	59	48	384	271	381	2868	2942	1881	83	47	91	254	326
132	C1_12660W	C1_12660W	133	GATTGAAAGGCGGACGGGGA	0	-	233	no	-141	141	60	0	0	0	0	0	0	456	482	385	348	415	379				403	271	310	359	446	391	343	354	338	21	6	4	271	279	332	976	926	522	904	850	1054	392	1106
133	C1_12660W	C1_12660W	134	ATTGGATTGAAAGGCGGACG	0	-	229	no	-137	137	50	2	0	2	2	2	0	1273	1571	1290	1475	1476	1487	17	28	29	2205	1685	2026	1310	1468	1023	1260	1287	1489	180	106	77	1262	1075	1167	1329	1321	833	1437	1222	1613	332	827
134	C1_12660W	C1_12660W	135	GATTGGATTGAAAGGCGGAC	0	-	228	no	-136	136	50	1	0	1	1	1	0	2529	2928	2402	3241	3556	3552	41	61	72	4351	3332	3842	2493	2785	2161	2784	3020	3087	365	257	160	2452	2013	2620	287	269	154	302	276	332	2	9
135	C1_12660W	C1_12660W	136	AGATTGGATTGAAAGGCGGA	0	-	227	no	-135	135	45	1	0	1	1	1	0	202	212	158	142	177	199	11	2	2	277	191	255	159	161	124	105	100	130	22	15	11	146	144	164	1162	1126	751	1577	1260	1099	497	750
136	C1_12810W	RIB7	137	CAAATTGCCTCCCACCACCA	0	+	145	no	-70	70	55	1	0	1	1	1	0	320	273	229	220	284	237	1	3	1	358	276	322	286	261	190	234	237	280	72	30	35	190	202	232	991	967	637	920	951	1002	464	116
137	C1_12810W	RIB7	138	AAATTGCCTCCCACCACCAA	0	+	144	no	-69	69	50	0	0	0	0	0	0	162	209	207	65	68	62	5	12	8	113	92	90	203	206	155	145	160	206	85	36	19	142	124	103	707	716	527	723	787	639	677	910
138	C1_12810W	RIB7	139	GGTTGGTTGGTAGATTTCAA	0	-	67	no	8	8	40	0	0	0	0	0	0	1687	1855	1591	2207	2355	2406	14	73	42	2210	1722	1907	1592	1838	1287	1614	1705	1701	259	131	149	1513	1334	1502	2877	2851	1937	2893	3303	3350	483	2309
139	C1_12810W	RIB7	140	ATTGGGGTTTGTTTGTTAGT	0	+	240	no	-165	165	35	0	0	0	0	0	0	3100	3538	2840	3820	4201	3679	62	110	38	4148	3191	3743	2900	3363	2303	3048	3161	3439	489	361	297	2821	2186	2814	4572	4574	2997	4912	4900	5243	1029	1570
140	C1_13370W	C1_13370W	141	AATGTTGATTTATCCATTAT	0	+	237	no	-172	172	20	0	0	0	0	0	0	48	76	53	82	46	66	4		2	100	104	71	44	63	57	81	44	32	11	5	4	60	53	35	181	137	113	149	166	227	8
141	C1_13370W	C1_13370W	142	TATCCATTATGGGGATGTGG	0	+	227	no	-162	162	45	0	0	0	0	0	0	637	784	611	58	64	67	16	130	98	93	90	110	629	724	564	672	674	669	145	153	43	547	384	553	1364	1345	892	922	864	1147	946	1249
142	C1_13370W	C1_13370W	143	CCATTATGGGGATGTGGTGG	0	+	224	no	-159	159	55	2	0	2	0	2	0	94	91	67	67	42	47			3	5	18	36	80	84	65	47	73	57	8	15	7	47	56	84	617	562	436	615	434	771	4	73
143	C1_13370W	C1_13370W	144	CCACCACCACATCCCCATAA	0	-	221	no	-156	156	55	2	0	2	0	2	0	6132	6979	5608	8189	8297	8532	26705	508	152	7714	5703	6875	5707	6538	4799	6438	6400	7051	915	541	430	5651	4986	5977	982	856	640	977	870	1142	143	32
144	C2_00710W	NPL6	145	AAGGATTCTGCAAATTAAAA	0	+	244	no	-209	209	25	2	0	2	0	2	0	1436	1476	1209	1547	1927	1863	26	30	45	2042	1483	1877	1273	1517	1096	1420	1413	1428	201	140	66	1215	1071	1217	1793	1838	1145	1988	2059	2084	96	125
145	C2_00710W	NPL6	146	GATTCTGCAAATTAAAAAGG	0	+	241	no	-206	206	30	0	0	0	0	0	0	244	288	205	364	390	421	6	7	4	570	481	315	248	300	194	268	217	297	42	21	11	202	160	216	658	701	449	738	631	817	220	22
146	C2_00710W	NPL6	147	ATTCTGCAAATTAAAAAGGA	0	+	240	no	-205	205	25	0	0	0	0	0	0	289	374	264	316	380	418		6	1	551	468	488	296	378	242	331	402	311	23	8	5	277	259	339	1358	1387	876	1377	1384	1453	528	251
147	C2_00710W	NPL6	148	TTCTGCAAATTAAAAAGGAG	0	+	239	no	-204	204	30	0	0	0	0	0	0	474	550	447	78	108	103	2	15	10	185	90	97	472	567	380	574	562	657	28	55	30	530	400	469	821	910	621	442	427	547	648	556
148	C2_01030W	C2_01030W	149	CTATGTGTTGAAAATATAAT	0	+	168	yes	-154	154	20	0	0	0	0	0	0	7	3											3	1											6	7	1
149	C2_01030W	C2_01030W	150	CTATTATATTTTCAACACAT	0	-	166	yes	-152	152	20	2	0	2	0	2	0	12	11	7	15	11	7				12	28	32	8	11	12	18	7	4	1			8	7	8	37	41	25	33	16	52		7
150	C2_01030W	C2_01030W	151	GCTGAACGTCAAATAGCTAC	0	-	83	no	-69	69	45	2	0	2	0	2	0	29	31	36	4	1	9	2	12	5	16	7	9	29	37	27	27	26	26	1	2	3	15	4	25	196	178	112	19	45	24	20	12
151	C2_01030W	C2_01030W	152	GATTTACATTCTGAAGATTC	0	+	221	yes	-207	207	30	0	0	0	0	0	0	1	2	2										1												80	66	73	98	118	208
152	C2_01200C	REG1	153	AAGATGGGTTATGTGTGTGT	0	-	118	no	313	313	40	2	0	2	0	2	0	406	423	364	143	187	115	1	5	11	84	61	111	329	375	275	285	358	355	38	18	14	359	254	295	1268	1380	906	1326	1320	1733	803	925
153	C2_01200C	REG1	154	AAAGATGGGTTATGTGTGTG	0	-	117	no	314	314	40	0	0	0	0	0	0	680	683	567	755	767	831	27	10	7	709	500	675	587	744	513	676	649	619	64	30	31	634	493	568	2815	2773	1878	2801	2626	3050	1709	1220
154	C2_01200C	REG1	155	GACAACGACAACGATAAAGA	0	-	102	no	329	329	40	0	0	0	0	0	0	1531	1778	1411	1699	1730	1691	50	27	37	742	495	808	1474	1676	1213	1447	1497	1690	427	246	206	1450	1079	1399	2655	2724	1874	3123	3196	3271	1069	2118
155	C2_01200C	REG1	156	ATAAACTCCGTATAAGATTG	0	-	228	no	203	203	30	0	0	0	0	0	0	943	1056	852	1209	1286	1372	26	84	54	1854	1367	1722	934	1118	809	1026	999	1133	207	131	92	961	852	863	456	461	335	543	658	694		2
156	C2_01300C	MNN24	157	AATAAGATAGAAAAGATGAA	0	-	198	no	-1	1	20	0	0	0	0	0	0	306	307	259	173	199	213	4	8	7	334	314	240	318	385	264	368	373	323	44	27	23	291	189	257	878	828	497	806	755	778	3807	4379
157	C2_01300C	MNN24	158	GAACAAGTGAATAAGGTGAT	0	-	70	no	127	127	35	0	0	0	0	0	0	1402	1451	1335	2038	2133	2016	50	67	48	2478	1771	2174	1334	1473	1165	1479	1532	1613	348	232	168	1339	1214	1500	264	257	181	243	162	228	448	605
158	C2_01300C	MNN24	159	TGAACAAGTGAATAAGGTGA	0	-	69	no	128	128	35	0	0	0	0	0	0	1322	1499	1157	1839	1974	1934	26	26	34	2155	1752	1800	1303	1360	1025	1206	1277	1452	206	114	116	1196	1015	1337	2871	2574	1819	3050	3152	3381	479	3309
159	C2_01300C	MNN24	160	GCTCCCTCAGAATTAGGTAT	0	-	30	no	167	167	45	0	0	0	0	0	0	6073	6651	5485	7545	8368	8216	175	126	152	7701	6262	7122	6044	6678	4781	6229	6102	6627	920	524	413	5603	4626	5712	2749	2566	1674	2656	2776	3157	2167	2725
160	C2_02270C	C2_02270C	161	AAAAAAATTAAAGTGAGAAC	0	-	205	no	-160	160	20	0	0	0	0	0	0	224	212	185	127	165	146	3	3	2	296	263	290	209	256	149	195	192	187	11	13	8	196	179	215	571	471	349	550	588	697	1	69
161	C2_02270C	C2_02270C	162	TATGTATATATCTTTGTTTA	0	-	20	no	25	25	15	0	0	0	0	0	0	717	757	575	690	751	873	58	80	87	865	642	779	642	748	475	742	719	618	508	310	268	578	499	598	981	999	793	1214	1242	1186	659	1947
162	C2_02270C	C2_02270C	163	AACAAACAAACAACTAACAT	0	+	242	no	-197	197	25	0	0	0	0	0	0	1177	1288	1010	899	1037	1090	8	19	26	1665	1275	1414	1057	1167	852	1086	1051	1233	132	76	71	1013	898	1009	3052	2964	2014	4373	3687	4403	2330	2359
163	C2_02270C	C2_02270C	164	AAACAACTAACATAGGTTTA	0	+	235	no	-190	190	25	2	0	2	0	2	0	764	855	620	738	842	954	16	34	26	936	920	850	762	754	603	803	788	776	146	69	75	683	552	655	1541	1605	1176	1778	1691	1508	1372	654
164	C2_03560C	C2_03560C	165	TGGCGCAAAGGACAAAAAAA	0	+	125	no	-99	99	40	2	0	2	0	2	0	6179	7185	6039	4634	4748	4853	434	386	637	6936	5384	5568	6218	7179	5264	6548	6757	6794	1129	646	495	5748	4784	5857	6005	5952	3956	6158	6112	7056	9170	17498
165	C2_03560C	C2_03560C	166	AGGAAATTCGCCAGAACTCT	0	+	105	no	-79	79	45	0	0	0	0	0	0	550	603	441	26	40	26	449	760	569	126	111	84	462	553	368	331	329	349	34	137	121	276	216	285	2812	2636	1899	875	681	982	2218	3280
166	C2_03560C	C2_03560C	167	GGCACTATCACCAAGAGTTC	0	-	92	no	-66	66	50	0	0	0	0	0	0	523	571	507	13	7	15	408	538	565	22	38	36	487	530	417	185	161	157	84	871	623	117	133	165	1987	1923	1314	366	409	464	2884	5045
167	C2_03560C	C2_03560C	168	CAAGAATAATGCTTGATTTC	0	-	37	no	-11	11	30	0	0	0	0	0	0	57	51	51	39	38	33		1		38	41	29	45	45	24	50	39	46	7	1	4	37	45	31	142	155	102	170	114	107	191
168	C2_04590C	QCR8	169	TTATTGGTCAGACTATATGC	0	-	163	no	-132	132	35	0	0	0	0	0	0	2	3	7	1		3							2	1	1			2						4	168	173	117	174	180	115	65	12
169	C2_04590C	QCR8	170	TCTCTCTCTCACTTTGGTGG	0	-	109	no	-78	78	50	0	0	0	0	0	0	2175	2336	1773	476	546	552	822	1372	1304	106	50	88	1907	2297	1683	2075	1963	2170	1757	1196	768	1747	943	1697	4432	4345	2890	1713	2136	2570	1168	1760
170	C2_04590C	QCR8	171	CTCTCTCTCTCTCACTTTGG	0	-	106	no	-75	75	50	1	0	1	0	1	0	994	1146	979	98	81	95	56	144	106	259	181	194	940	1088	791	741	720	877	141	97	56	668	573	701	459	471	312	104	95	135	19	39
171	C2_04590C	QCR8	172	TCTCTCTCTCTCTCTCACTT	0	-	103	no	-72	72	45	1	0	1	0	1	0	1961	2010	1740	1383	1405	1431	872	1149	1243	1715	1298	1470	1793	2001	1381	1213	1074	1210	181	201	104	972	979	983	4153	3843	2620	623	550	587	3086	4472
172	C2_04710C	URE2	173	GGAATTTGATATATTTATGG	0	-	262	no	182	182	25	1	0	1	0	1	0	4376	4996	3905	5087	5783	5955	171	228	242	5063	3638	5044	4281	4983	3570	4982	5119	4791	1307	832	580	4681	3606	4272	1306	1480	947	1582	1245	1511	988	991
173	C2_04710C	URE2	174	ATGGGAATTTGATATATTTA	0	-	259	no	185	185	20	0	0	0	0	0	0	3205	3537	2819	3866	4780	4580	167	269	226	5853	4596	5336	3084	3442	2491	3434	3711	3487	548	395	314	3081	2714	3068	5394	5718	3810	6637	6150	6516	4612	3966
174	C2_04710C	URE2	175	TGTGATAATTGATGGAATAA	0	-	240	no	204	204	25	0	0	0	0	0	0	1773	1905	1611	2276	2675	2733	32	32	43	2850	2201	2649	1655	1882	1280	1775	2027	1923	296	174	130	1603	1460	1490	2318	2426	1599	2825	2877	2856	268	353
175	C2_04710C	URE2	176	TTATAATCTGTGATAATTGA	0	-	232	no	212	212	20	0	0	0	0	0	0	22	35	31	26	17	19	22	17	54	16	29	26	33	38	20	33	29	31	189	156	103	17	23	26	71	77	58	96	54	59
176	C2_04800C	MDM10	177	GTGGTTGATGTGGTTTGGTC	0	-	133	no	-11	11	50	0	0	0	0	0	0	203	188	163	133	162	187	72	56	64	269	121	167	174	220	152	166	155	182	279	203	194	154	165	154	194	205	127	117	221	245	6	14
177	C2_04800C	MDM10	178	TAAAATGTTGATGGTTGATG	0	-	114	no	8	8	30	0	0	0	0	0	0	1313	1489	1164	1225	1356	1248	20	16	17	1066	904	986	1279	1424	1048	1149	1218	1253	205	110	98	1036	1013	1124	1034	938	587	1152	1048	1274	407	806
178	C2_04800C	MDM10	179	TACATAATCACACTAATTAT	0	+	245	no	-123	123	20	0	0	0	0	0	0	267	321	222	102	142	106	33	44	32	197	147	171	234	234	170	265	192	184	327	220	204	214	122	180	473	479	356	465	463	581	482	1047
179	C2_04800C	MDM10	180	ATTAGTGTGATTATGTAAGC	0	-	248	no	-126	126	30	0	0	0	0	0	0	338	373	313	305	445	366		2	6	505	359	431	389	355	255	362	323	268	50	20	33	309	265	264	928	773	585	844	777	992	623	2333
180	C2_04810W	HIS3	183	TTATTCATTACATAACTTAT	0	+	36	no	40	40	15	0	0	0	0	0	0	119	128	112	134	164	221		1		268	177	248	127	154	96	139	136	86	7	7	2	111	100	148	109	111	93	92	123	187		1
181	C2_04810W	HIS3	184	TCGTTTGTGCTTTAACTTCT	0	+	259	no	-183	183	35	0	0	0	0	0	0	76	114	99	74	97	103	3	4		215	141	104	90	132	96	71	61	74	5	6	2	73	64	77	417	452	350	465	464	407		111
182	C2_05500W	ATP4	185	AGATACTAGATTTCCTATTT	0	-	170	no	-140	140	25	0	0	0	0	0	0	767	832	666	861	923	853	18	7	1	992	710	951	712	843	589	673	669	786	51	31	59	694	533	668	2739	2677	1811	3011	2829	2880	1592	2893
183	C2_05500W	ATP4	186	GAGCGAGAAACAAATATGAT	0	-	146	no	-116	116	35	0	0	0	0	0	0	406	539	389	444	639	521	15	18	5	970	850	896	427	355	324	466	383	434	65	56	26	407	282	351	1285	1304	866	1271	1251	1580	371	651
184	C2_05500W	ATP4	187	TGTAAATGTGAAAGAAAGGG	0	+	79	no	-49	49	35	0	0	0	0	0	0	1104	1158	948	96	91	69	141	242	154	112	87	72	1047	1189	862	464	453	484	709	554	431	313	286	388	4441	4538	2910	619	526	720	1354	1188
185	C2_05500W	ATP4	188	GTAAATGTGAAAGAAAGGGA	0	+	78	no	-48	48	35	0	0	0	0	0	0	156	165	113	1			6	6	11		5	1	160	217	147	28	22	25	15	24	15	38	17	25	736	695	493	42	22	44	24	99
186	C2_06120C	C2_06120C	189	AATTTGGAACGCGTTTATTA	0	+	117	no	-105	105	30	0	0	0	0	0	0	70	93	75	61	58	56			2	40	41	84	79	88	47	83	83	39	3	12	10	54	35	51	58	67	50	63	43	62
187	C2_06120C	C2_06120C	190	AACGCGTTCCAAATTTGTTC	0	-	122	no	-110	110	40	0	0	0	0	0	0	172	198	160	189	184	202	3	4	4	206	119	164	178	180	110	159	171	128	17	9	13	80	77	128	646	562	403	886	648	1004	123	4273
188	C2_06120C	C2_06120C	191	CGTGTGTCTGTGCAGGCTGT	0	+	288	no	-276	276	60	0	0	0	0	0	0	2854	3255	2938	3635	3749	3702	38	38	33	3468	2681	3278	2726	3307	2295	2818	2912	3205	339	151	171	2650	2405	3041	832	757	494	775	688	890	154	1
189	C2_06120C	C2_06120C	192	GTGTGTCTGTGCAGGCTGTT	0	+	287	no	-275	275	55	0	0	0	0	0	0	17	28	30	29	16	13	1	22	7	21	23	28	12	27	13	15	9	16	42		1	2	8	10	616	564	356	654	653	584	997	1289
190	C2_06290C	ATP14	193	CACACACTTGAGTTGATTTG	0	+	117	no	-86	86	40	0	0	0	0	0	0	218	242	207	2	1	1	7	24	16	4	3	9	226	241	176	63	45	42	3	26	18	45	27	40	991	1008	699	4	7	12	471	703
191	C2_06290C	ATP14	194	CACTTGAGTTGATTTGTGGA	0	+	113	no	-82	82	40	0	0	0	0	0	0	1												1	2											8	20	4	8	2
192	C2_06290C	ATP14	195	CTTGAGTTGATTTGTGGAAG	0	+	111	no	-80	80	40	0	0	0	0	0	0	308	304	272	83	118	96	13	22	25	176	134	168	277	365	212	246	239	268	39	18	8	207	183	255	594	626	382	254	210	241	80	32
193	C2_06290C	ATP14	196	CAACTCAAGTGTGTGCGATT	0	-	122	no	-91	91	45	0	0	0	0	0	0	2	7	4											5											46	63	38					1
194	C2_07670C	GLE1	197	TTACGGAATAGAAAATGTAG	0	-	112	no	24	24	30	0	0	0	0	0	0	301	263	272	103	101	124	5	3	4	131	102	173	287	290	200	269	257	208	32	11	18	191	190	210	465	495	328	33	15	42	769	1171
195	C2_07670C	GLE1	198	TTGTATGATTCAGATACTAG	0	-	81	no	55	55	30	0	0	0	0	0	0	51	37	60	42	34	33	4			143	60	53	50	59	41	38	49	54	4	8	14	55	43	29	145	129	97	122	118	96	112	195
196	C2_07670C	GLE1	199	TAGTCTGTGATTCACCAAAT	0	+	256	no	-120	120	35	0	0	0	0	0	0	199	194	136	153	185	171	5	3	6	326	198	164	131	195	146	125	149	173	30	18	29	142	112	147	1297	1353	850	1415	1501	1642	383	243
197	C2_07670C	GLE1	200	AACACTCATGAATGAGATAG	0	+	286	no	-150	150	35	0	0	0	0	0	0	147	194	131	125	162	174	3	1	8	210	206	158	140	194	120	145	126	154	30	24	9	143	100	167	727	751	472	887	771	666	910	719
198	C2_07680W	C2_07680W	201	GTTAACGTCGGTCTTTCTTC	0	-	156	no	-135	135	45	0	0	0	0	0	0	683	637	594	851	947	1007	35	49	31	1056	692	858	513	756	484	651	658	631	427	215	189	551	437	566	1065	1160	725	992	783	979	72	40
199	C2_07680W	C2_07680W	202	TTCTCCCTCTCCATTCTGTT	0	+	84	no	-63	63	45	0	0	0	0	0	0	317	397	264	6	2		163	189	149	23	14	10	327	315	228	81	78	98	64	781	605	68	74	68	788	725	527	73	112	83	975	1359
200	C2_07680W	C2_07680W	203	CTAACCAAACAGAATGGAGA	0	-	77	no	-56	56	40	0	0	0	0	0	0	119	110	107				9	9	4				123	142	97	11	10	10	59	193	150	9	5	3	122	85	83				354	289
201	C2_07680W	C2_07680W	204	TCTAACCAAACAGAATGGAG	0	-	76	no	-55	55	40	0	0	0	0	0	0	1007	1084	833				23	58	51	4		6	967	1064	811	86	67	96	732	2220	1688	75	59	81	1152	1118	762	276	155	225	88	193
202	C2_09380W	RRP15	205	CGAGAGTCTAATTTCTTACG	0	-	106	no	-46	46	40	0	0	0	0	0	0	470	499	413	13	7	15	2	5	2	38	53	44	447	538	360	413	361	469	26	10	24	308	256	306	959	937	555	615	433	750	101	218
203	C2_09380W	RRP15	206	TATGAAGAGACCATCCCTCT	0	+	62	no	-2	2	45	0	0	0	0	0	0	1158	1244	1009	42	42	39	34	16	13	91	68	48	1037	1177	886	835	760	734	69	36	21	629	528	753	2856	2814	1878	2421	2193	2543	3463	3855
204	C2_09380W	RRP15	207	CATCCCTCTAGGTAAACCAC	0	+	51	no	9	9	50	0	0	0	0	0	0	385	424	340	62	77	59	1	2	1	109	71	100	308	430	257	342	268	304	20	8	12	238	173	257	52	55	33	5	11	7
205	C2_09380W	RRP15	208	CAGTGGTTTACCTAGAGGGA	0	-	49	no	11	11	50	0	0	0	0	0	0	7	5	8										5	3	5	2	2	3				4		9	5	7	6
206	C2_09680W	C2_09680W	209	GACTTGGTTGCACACTCCGG	0	+	277	no	-184	184	60	0	0	0	0	0	0	1386	1475	1243	165	218	188	22	20	10	97	106	110	1252	1501	1152	864	971	935	73	18	21	737	613	682	2605	2459	1521	1333	1213	1432	796	890
207	C2_09680W	C2_09680W	210	CAACCAAGTCCAAAGTGGGC	0	-	287	no	-194	194	55	0	0	0	0	0	0	24	32	17	33	15	24				34	8	59	30	26	19	34	12	61	21	12		33	14	13	242	263	168	419	402	318	7	1
208	C2_09680W	C2_09680W	211	GTGTGCAACCAAGTCCAAAG	0	-	282	no	-189	189	50	0	0	0	0	0	0	6	3	5										2	2											12	12	6
209	C2_09680W	C2_09680W	212	GAAGTATTTGGAAATACTAA	0	-	24	no	69	69	25	0	0	0	0	0	0	107	133	119	163	180	196	2	3	2	229	163	232	130	157	111	128	144	191	34	19	1528	153	134	95	422	455	321	634	768	621	551	662
210	C2_09840W	MTW1	213	AACAGACCACCACAACTACT	0	+	40	no	8	8	45	0	0	0	0	0	0	1486	1672	1472	1559	1887	1675	8	16	8	2435	1625	2023	1410	1561	1160	1506	1626	1685	140	102	67	1350	1060	1367	1243	1197	799	1724	1706	1570	183	65
211	C2_09840W	MTW1	214	GTTGTGGTGGTCTGTTGTTG	0	-	44	no	4	4	50	0	0	0	0	0	0	223	292	254	116	117	164	6	11	23	325	242	325	260	273	211	271	227	233	81	36	39	190	121	236	1169	1120	778	1259	1307	1324	914	2173
212	C2_09840W	MTW1	215	GAATAGCCAAGTAGTTGTGG	0	-	31	no	17	17	45	0	0	0	0	0	0	19	32	19	3				1		4		4	30	23	15	21	21	9		1	2	9	11	12	431	379	211	307	422	451	23
213	C2_09840W	MTW1	216	TAAGAATAGCCAAGTAGTTG	0	-	28	no	20	20	35	0	0	2	0	2	0	3817	4235	3353	4064	4172	4392	55	78	59	5162	3970	4780	3708	4294	2900	4279	4139	4371	537	271	298	3711	3096	3619	2496	2662	1733	3002	2674	3127	1001	970
214	C2_10280C	SPT23	217	AAAGTGGAAAGTGGTGGAGG	0	-	150	no	11	11	50	0	0	2	0	2	0	362	389	317	78	72	48	3	5	19	510	349	246	334	352	285	420	380	377	11	36	17	323	325	322	898	755	560	828	765	968	474	496
215	C2_10280C	SPT23	218	TGTGTGTAATAAGTGTGTGT	0	-	281	no	-120	120	35	0	0	2	0	2	0	1116	1104	890	324	440	344	23	38	26	556	447	444	883	1070	761	591	592	634	102	58	57	530	464	511	2692	2641	1720	1278	1190	1420	2491	3733
216	C2_10280C	SPT23	219	TTGAGTAGGCGGGTGGTAGT	0	-	246	no	-85	85	55	0	0	2	0	2	0	273	251	248	3	2		31	53	42	11	10	7	225	254	164	83	69	73	371	228	187	79	50	49	364	319	279			1	4	8
217	C2_10280C	SPT23	220	TTTGAGTAGGCGGGTGGTAG	0	-	245	no	-84	84	55	0	0	0	0	0	0	668	745	555	119	88	146	8	9	8	163	88	110	600	693	494	217	231	257	46	24	24	226	173	213	1687	1605	1078	118	118	231	728	377
218	C3_01080W	MRPL33	221	CGAAAGCTCAACGTTAAGGA	0	+	103	no	-27	27	45	0	0	0	0	0	0	5	10	3										5		1										66	51	51	5	7	5	40	117
219	C3_01080W	MRPL33	222	CAACGTTAAGGAAGGAAGGA	0	+	95	no	-19	19	45	0	0	0	0	0	0	272	352	294	2		3	14	15	22	100	76	87	289	334	240	186	160	215	88	63	29	157	147	231	1002	1025	630	6	12	21	1633	1445
220	C3_01080W	MRPL33	223	TCCCGGACAACACCCAAAAC	0	+	247	no	-171	171	55	0	0	0	0	0	0	678	695	593	15	14	16	14	21	9	106	96	94	633	771	544	350	396	437	54	36	47	293	222	317	537	546	367	37	23	21	19	11
221	C3_01080W	MRPL33	224	GGTTTGCAAAAACACATTTA	0	+	226	no	-150	150	30	1	0	1	0	0	0	241	345	200	4	11	6	5	15	23	44	16	20	250	289	195	155	135	181	50	37	36	180	98	104	1075	1006	683	105	81	217	179	196
222	C3_01300C	NCE103	225	GGAAGGGATATAAACAATTT	0	-	103	no	242	242	30	1	0	1	0	0	0	801	858	703	860	885	902	28	29	26	1081	864	940	838	896	654	657	635	814	182	79	107	636	570	608	3005	2936	1880	3203	3289	3485	1929	1059
223	C3_01300C	NCE103	226	TCTTGTACGACCAGTATCAG	0	+	60	no	285	285	45	0	0	0	0	0	0	149	213	138	182	241	249	2	2	1	269	139	200	172	162	108	169	154	190	10	5	6	161	112	129	347	340	212	329	310	322	6	6
224	C3_01300C	NCE103	227	TGGCATCACCATCTCAATTG	0	+	40	no	305	305	45	0	0	0	0	0	0	1629	1799	1512	2084	2250	2084	35	63	93	2274	1955	2065	1597	1843	1259	1340	1467	1701	355	227	160	1474	1170	1418	3444	3378	2319	3661	3484	4180	2387	514
225	C3_01300C	NCE103	228	GATGGTGATGCCACTGATAC	0	-	47	no	298	298	50	0	0	0	0	0	0	21	23	9	4		1				2	8		7	31	8		9	1				1		3	665	784	507	985	914	917	787	2147
226	C3_02370C	ALR1	229	GAACTAAGGACTGAGGACTG	0	-	181	no	362	362	50	0	0	0	0	0	0	63	63	55	56	42	59	3	1	2	92	59	56	82	70	52	43	69	43	2	5	2	40	37	45	733	749	418	765	652	740	196	141
227	C3_02370C	ALR1	230	ATATTAAGAACTAAGGACTG	0	-	174	no	369	369	30	0	0	0	0	0	0	1370	1534	1281	2461	2629	2587	10	15	24	2960	2394	2765	1286	1610	1107	1538	1576	1622	196	109	85	1473	1233	1477	347	298	182	430	276	364	4	13
228	C3_02370C	ALR1	231	GGACTAGACTAGGAACAGGG	0	-	249	no	294	294	55	0	0	0	0	0	0	605	694	585	321	330	292	23	36	40	120	76	119	562	684	491	563	633	669	217	90	93	550	472	578	868	741	528	330	375	465	9	48
229	C3_02370C	ALR1	232	ATTGGACTAGACTAGGAACA	0	-	246	no	297	297	40	0	0	0	0	0	0	165	226	156	128	91	139	4	3		131	100	64	221	215	137	173	151	127	24	7	11	151	144	141	599	560	341	637	479	658	204	73
230	C3_02670W	C3_02670W	233	TTGCTTTCACAAAGATCACT	0	-	190	no	-172	172	35	0	0	0	0	0	0	82	82	72	78	98	129			3	103	69	131	55	89	60	70	96	70	10	2	3	77	49	66	289	318	229	307	380	337	18	17
231	C3_02670W	C3_02670W	234	GTTGCTTTCACAAAGATCAC	0	-	189	no	-171	171	40	0	0	0	0	0	0	28	32	25	32	30	29		2		23	19	12	27	33	11	24	30	42	2			12	26	48	6	8	10
232	C3_02670W	C3_02670W	235	CAACAGATGGTGATGGTTGT	0	+	88	no	-70	70	45	0	0	0	0	0	0	36	58	30	7	1	8		4		11	4	8	29	36	21	24	36	21	4		1	18	29	34	387	318	196	288	248	503	8
233	C3_02670W	C3_02670W	236	CACCATCTGTTGCAAAAAAT	0	-	96	no	-78	78	35	0	0	0	0	0	0	86	86	95	93	127	107	25	11	8	149	79	68	97	70	88	90	83	83	9	35	11	58	62	71	100	109	74	67	89	108
234	C3_04830C	FAS2	237	AATTTCTTGTAAGCTAATTG	0	+	290	no	-247	247	25	0	0	0	0	0	0	120	128	116	172	166	145	10	5	4	98	92	68	119	116	80	102	109	120	10	19	14	112	58	148	328	323	186	287	291	242	26	187
235	C3_04830C	FAS2	238	TAAGCTAATTGAGGGTGTTT	0	+	281	no	-238	238	35	0	0	0	0	0	0	1099	1155	966	1181	1212	1153	19	18	26	1430	1268	1327	1038	1160	819	952	923	1085	135	119	72	917	672	865	3330	3347	2165	3511	3741	3729	3660	3187
236	C3_04830C	FAS2	239	TCCAGCTTAGGGCATATTGT	0	+	153	no	-110	110	45	0	0	0	0	0	0	1381	1425	1319	1347	1297	1448	41	85	63	1550	1393	1491	1288	1507	1089	1127	1093	1198	512	395	277	1043	894	981	2961	2874	1849	3322	2994	3387	474	961
237	C3_04830C	FAS2	240	ACCAACAATATGCCCTAAGC	0	-	149	no	-106	106	45	0	0	0	0	0	0	532	601	471	431	447	383	8	26	34	940	601	781	507	655	379	535	489	503	106	54	37	489	354	484	1670	1625	1082	1754	1944	2030	1438	760
238	C3_05800W	C3_05800W	241	CCAAAAAAACACGACTTGGA	0	+	132	no	-104	104	40	0	0	0	0	0	0	1016	1105	923	17	11	7	15	23	46	66	53	46	956	1130	805	618	663	713	196	139	112	546	370	542	652	604	404	69	4	65	257	61
239	C3_05800W	C3_05800W	242	ACTAGTGTCTTGTACGTTAT	0	+	269	no	-241	241	35	0	0	1	0	1	0	170	191	149	217	224	253			3	248	213	230	221	174	123	182	189	187	15	10	16	104	115	186	557	488	380	672	671	560	75	44
240	C3_05800W	C3_05800W	243	CAGTAAGACAAACCAAGCCA	0	+	16	no	12	12	45	0	0	1	0	1	0	90	97	70		5		70	64	65		4	4	82	99	83	71	42	50	369	272	218	51	36	33	430	394	266	481	472	542	576	378
241	C3_05800W	C3_05800W	244	AGTAAGACAAACCAAGCCAA	0	+	15	no	13	13	40	0	0	0	0	0	0	4961	5822	4655	5431	6028	5773	55	100	90	5337	4543	4943	4799	5596	3952	5166	5168	5245	728	374	370	4549	3903	4714	9708	9144	6050	9625	9152	10863	3928	7234
242	C3_05830W	KRE6	245	TAGCAACCCTTTATTATACT	0	+	73	no	132	132	30	0	0	0	0	0	0	1279	1473	1165	1632	1802	1791	52	44	37	2106	1738	1943	1161	1392	1009	1301	1338	1322	224	107	106	1107	956	1146	4176	4114	2894	5020	4428	5252	3707	7363
243	C3_05830W	KRE6	246	AATGTTGCCAAGTATAATAA	0	-	63	no	142	142	25	0	0	0	0	0	0	426	418	349	437	450	476	21	5	5	972	610	858	416	405	326	326	372	367	62	41	29	320	300	296	2280	2165	1576	2617	2668	3047	1589	2167
244	C3_05830W	KRE6	247	ATATATATATATATGAATGG	0	-	32	no	173	173	15	0	0	0	0	0	0	12	9	9	9	4	12		4		7	4	4	14	14	9	17	11	4	11	2	7	19	5	11	90	65	48	60	89	85	18	68
245	C3_05830W	KRE6	248	TATTCTATTCTATTCTATTA	0	+	200	no	5	5	15	0	0	0	0	0	0	339	362	276	319	379	403	6	14	12	455	414	412	266	373	289	318	370	314	87	51	34	324	298	313	861	858	645	1036	1055	924	82	30
246	C3_06520C	C3_06520C	249	AGGGGAGTAAAAGAGCATCG	0	+	190	no	-143	143	50	0	0	0	0	0	0	3553	3857	3154	3280	3475	3506	79	146	107	4551	3461	3764	3350	3794	2695	3377	3077	3604	842	551	346	3118	2609	2936	7258	7458	4839	7479	7309	8029	3885	4490
247	C3_06520C	C3_06520C	250	GAAGAATGAGACGCGCGATG	0	+	158	no	-111	111	55	0	0	1	0	1	0	415	459	397	45	61	46	4	7	5	163	145	138	365	494	274	319	368	442	56	31	42	389	265	356	1105	1138	741	1086	1102	1162	24	311
248	C3_06520C	C3_06520C	251	AAGAATGAGACGCGCGATGT	0	+	157	no	-110	110	50	0	0	0	0	0	0	407	442	336	391	436	400	1	3	13	407	248	427	388	407	322	395	387	398	79	18	12	338	336	271	1370	1284	912	1489	1541	1943	838	1031
249	C3_06520C	C3_06520C	252	TATGTTGAATTTACTTAACG	0	+	217	no	-170	170	25	0	0	0	0	0	0	216	217	200	240	279	354		5	5	374	197	289	213	221	143	246	192	260	34	20	21	265	202	200	658	683	446	745	744	754	162	156
250	C3_07320W	MDS3	253	ACAAAAAGTGAGGGCGTGAG	0	-	86	no	82	82	50	0	0	0	0	0	0	3991	4391	3707	3738	3694	4023	206	847	141	6253	5773	4497	3756	4232	3073	4373	4109	4479	568	343	291	3844	3281	3831	5011	4731	3068	3091	3381	3556	2838	2594
251	C3_07320W	MDS3	254	AAACAAAAAGTGAGGGCGTG	0	-	84	no	84	84	45	0	0	0	0	0	0	279	297	252	276	350	322	7	9	11	254	213	309	279	282	233	262	223	250	43	15	7	220	213	254	1102	1240	791	1231	1159	1354	526	870
252	C3_07320W	MDS3	255	GATCTTAAGGCACAAGTTAT	0	+	49	no	119	119	35	0	0	0	0	0	0	683	689	655	816	889	967	28	7	17	909	661	824	656	710	530	655	755	766	94	80	49	678	508	657	895	887	543	921	955	820	941	2129
253	C3_07320W	MDS3	256	ATATAACCCACAAGTCTTAG	0	-	253	no	-85	85	35	0	0	0	0	0	0	173	195	172	22	36	32	5	5	2	54	61	27	166	177	129	100	69	128	21	14	10	87	72	99	796	816	485	394	396	376	61	27
254	C3_07390C	C3_07390C	257	TGGTAGGTTTGCAGTTGTTG	0	-	29	no	5	5	45	0	0	0	0	0	0	547	628	513	129	89	94	226	398	289	278	178	236	572	637	446	489	512	514	51	37	44	448	358	404	1519	1416	974	1030	837	1103	341	71
255	C3_07390C	C3_07390C	258	AGAAGGTTGGAGAGCAAGAT	0	-	255	no	-221	221	45	0	0	0	0	0	0	2599	2898	2433	2815	3039	3012	70	161	99	3682	2569	2952	2461	2733	2059	2602	2573	2824	492	293	312	2315	2062	2414	3734	3719	2400	3855	3935	4620	604	1140
256	C3_07390C	C3_07390C	259	GACGAGCTAAAGAAGAAGGT	0	-	242	no	-208	208	45	0	0	0	0	0	0	2921	3360	2817	3617	3841	3846	68	124	53	4541	3599	4297	2893	3202	2314	3015	3095	3289	565	386	222	2846	2449	2899	2670	2463	1515	2654	2357	2716	2034	2267
257	C3_07390C	C3_07390C	260	TAAGTCACGTTTGTCCTTGC	0	+	215	no	-181	181	45	0	0	0	0	0	0	155	224	155	212	272	282	15	10	14	267	165	208	227	201	137	162	149	224	17	36	18	188	165	201	3297	3425	2169	3313	2458	3463	15345	23864
258	C3_07780C	NUP159	261	GGACTGGTTCAAAATTAGTG	0	+	280	no	-261	261	40	0	0	0	0	0	0	1396	1719	1439	1770	1816	1708	25	53	28	2080	1554	1988	1517	1619	1239	1660	1640	1657	332	228	132	1507	1288	1454	1565	1627	1079	1626	1646	1890	365	684
259	C3_07780C	NUP159	262	CTTCTTGTAGCCTCCCAACA	0	+	101	no	-82	82	50	0	0	0	0	0	0	8	5	5										5	2	4	1	2	2							12	32	24
260	C3_07780C	NUP159	263	GTGTGGTGCACGACCATGTT	0	-	85	no	-66	66	55	0	0	0	0	0	0		1	1										3		1										154	158	107	176	231	176	12	10
261	C3_07780C	NUP159	264	TGTGTGGTGCACGACCATGT	0	-	84	no	-65	65	55	0	0	0	0	0	0	700	698	598	689	833	829		5	6	697	607	756	617	764	520	577	596	668	69	37	16	540	472	489	2898	2680	1813	3157	3409	3721	1141	594
262	C4_00560C	MMM1	265	TAGTGCCAGAGATTTCACAG	0	+	89	no	-54	54	45	0	0	0	0	0	0	885	934	718	42	18	20	4	13	13	199	219	185	762	875	689	896	959	959	63	35	31	709	745	761	823	733	556	205	165	246	63	67
263	C4_00560C	MMM1	266	AGTGCCAGAGATTTCACAGT	0	+	88	no	-53	53	45	0	0	0	0	0	0	3901	4346	3470	503	618	474	52	155	139	1251	1011	928	3627	4129	3014	3490	3447	3607	677	366	314	3029	2747	3237	4500	4643	3068	508	628	733	3760	5225
264	C4_00560C	MMM1	267	TGCCAGAGATTTCACAGTGG	0	+	86	no	-51	51	50	0	0	0	0	0	0	760	781	735	309	281	274		9	11	412	301	345	672	755	574	462	398	452	59	39	25	401	340	382	1361	1246	810	26	27	50	862	926
265	C4_00560C	MMM1	268	CCAGAGATTTCACAGTGGGG	0	+	84	no	-49	49	55	0	0	0	0	0	0	543	573	431				6	4	5			3	526	572	436	199	263	253	44	29	25	173	149	145	272	324	164			1
266	C4_00890W	ARO1	269	CGATGAGCCATGACCAACAA	0	-	198	no	-177	177	50	0	0	0	0	0	0	274	288	207	220	274	211	5	1	1	245	154	152	242	302	179	282	200	260	8	13	11	203	150	194	1742	1758	1150	2033	1344	1931	976	1062
267	C4_00890W	ARO1	270	ACGATGAGCCATGACCAACA	0	-	197	no	-176	176	50	0	0	0	0	0	0	328	436	307	36	19	15	266	450	446	78	40	64	372	319	218	295	341	298	30	19	22	255	218	238	1710	1481	1006	1356	1296	1664	223	715
268	C4_00890W	ARO1	271	TTTCTCCATCAAACGGTGTT	0	+	168	no	-147	147	40	0	0	0	0	0	0	113	109	126	2	2	2	5	1		48	26	17	120	150	85	103	117	110	14	1	4	122	72	116	200	199	135	88	49	86	1
269	C4_00890W	ARO1	272	ACGGTGTTTGGTTTCTCGTT	0	+	156	no	-135	135	45	0	0	0	0	0	0	1336	1431	1205	216	164	213	19	18	24	340	234	390	1188	1375	1031	1366	1274	1321	144	89	53	1205	971	1275	1020	981	652	515	717	644	710	744
270	C4_01150W	ASK1	273	GTGTGTTTAAGGGATGCTGG	0	+	280	no	-252	252	50	0	0	0	0	0	0	283	331	270	93	95	101	18	58	41	236	264	211	285	302	260	306	302	320	49	71	55	241	210	215	410	400	277	321	330	518	747	720
271	C4_01150W	ASK1	274	TGGTGGTAAATGGTTAGTGG	0	+	205	no	-177	177	45	0	0	0	0	0	0	971	1100	924	4	2	7	10	49	5	20	25	26	995	1146	763	142	148	134	66	42	39	159	94	133	3313	3164	2141	205	178	183	2460	3814
272	C4_01150W	ASK1	275	AAATGGTTAGTGGTGGTAAG	0	+	198	no	-170	170	40	0	0	0	0	0	0	155	161	153		2		8	9	1	6	4		135	187	140	8	14	7	5	3	5	5	11	5	441	361	251	171	156	172	14	26
273	C4_01150W	ASK1	276	TTAGTGGTGGTAAGTGGAGG	0	+	192	no	-164	164	50	0	0	0	0	0	0	59	50	45			2		6	1	5	8	11	65	40	39	4	13	6	12	6		10	5	2	453	449	284	15	28	39	40	119
274	C4_01750C	FBA1	277	GTAGGCAAGCAGGCAGAAAG	0	+	210	no	-153	153	55	0	0	0	0	0	0	91	88	76	3	1	3	4	1	29	1	2		93	92	64	34	39	39	6	4	3	32	19	43	555	528	327	24	28	48	71	424
275	C4_01750C	FBA1	278	TAGGCAAGCAGGCAGAAAGT	0	+	209	no	-152	152	50	0	0	0	0	0	0	928	988	810	95	148	116	14	84	42	158	116	148	909	993	701	651	592	806	78	48	48	635	419	561	487	394	297	108	39	141	49	165
276	C4_01750C	FBA1	279	TTCTGCCTGCTTGCCTACGT	0	-	212	no	-155	155	55	0	0	0	0	0	0	160	162	153	6	2	3	20	31	28	8	4	29	148	179	112	91	102	88	10	8	7	77	39	60	29	28	12		2			37
277	C4_01750C	FBA1	280	TTTCTGCCTGCTTGCCTACG	0	-	211	no	-154	154	55	0	0	0	0	0	0	96	132	126	12	1	14	2	9	35	16	9	9	106	131	51	104	56	75	59	18	32	58	48	51	354	399	221	97	151	115	136	366
278	C4_01870C	ERG8	281	CATTGGTATAATTGGTCTTG	0	-	271	no	-239	239	35	0	0	0	0	0	0	164	145	120	155	159	139		3		171	146	177	119	127	104	160	115	144	27	3	7	111	111	150	337	271	218	273	273	328	169	108
279	C4_01870C	ERG8	282	CCATTGGTATAATTGGTCTT	0	-	270	no	-238	238	35	0	0	0	0	0	0	142	142	111	149	145	188	11	5	33	167	178	186	139	158	99	129	112	198	31	72	27	131	72	88	175	185	122	176	109	190	724	1092
280	C4_01870C	ERG8	283	TTACAAGAATGCAAGACCAT	0	-	254	no	-222	222	35	0	0	0	0	0	0	2985	3139	2809	5267	5654	5459	60	88	70	5806	4768	5304	2811	3155	2495	3309	3069	3656	470	269	220	3036	2671	2918	1434	1239	769	1486	1377	1501	1598	2207
281	C4_01870C	ERG8	284	ACAAGTTACACATATAGCTA	0	-	211	no	-179	179	30	0	0	0	0	0	0	600	687	542	771	814	890	12	20	9	1144	945	969	564	728	503	644	523	639	77	69	36	503	490	601	812	857	607	1018	903	1068	72	13
282	C4_01880W	TYR1	285	TTGGCGTGAAAAAAAAAACG	0	-	116	no	-68	68	35	0	0	0	0	0	0	335	365	311	17	25	8	6	7	3	25	38	18	290	375	293	167	161	157	23	16	18	154	103	133	159	174	107	5	4	2
283	C4_01880W	TYR1	286	GGAAAAGCATTTCTTGCTGG	0	-	254	no	-206	206	45	0	0	0	0	0	0	109	106	95	63	73	78	2	11	3	56	58	84	90	101	100	121	56	83	19	9	9	83	49	65	640	652	471	710	653	760	59	1
284	C4_01880W	TYR1	287	CCTGGAAAAGCATTTCTTGC	0	-	251	no	-203	203	45	0	0	0	0	0	0	387	359	279	400	473	426	1	9	5	590	344	506	333	371	232	331	405	373	40	23	9	316	271	296	234	240	145	195	178	279	33
285	C4_01880W	TYR1	288	TGACATTGCCAATTGATGAT	0	+	216	no	-168	168	35	0	0	0	0	0	0	852	939	722	940	978	960	3	30	14	1192	1062	1068	758	919	683	754	777	830	99	74	52	727	581	664	2208	2133	1344	2089	1973	2064	1515	2719
286	C4_01980C	CLC1	289	ATAAGTTTGTCGTGTGTTTG	0	-	153	no	-105	105	35	0	0	0	0	0	0	643	678	636	780	868	926	10	26	20	957	671	947	652	728	504	607	661	632	176	84	48	506	470	556	1201	1112	712	1283	1276	1465	84	724
287	C4_01980C	CLC1	290	ATCAAATACTGGGCAAGAGC	0	-	63	no	-15	15	45	0	0	0	0	0	0	2979	3327	2737	141	191	232	3250	4679	5082	281	187	193	2742	3125	2211	2019	1919	1986	32499	22129	18823	1419	993	1369	5639	5482	3466	861	737	970	1249	1331
288	C4_01980C	CLC1	291	AATCAAATACTGGGCAAGAG	0	-	62	no	-14	14	40	0	0	0	0	0	0	1159	1359	1110	102	97	100	2901	4268	4387	80	46	125	1194	1292	1045	1099	1058	1196	26853	15621	11668	1064	600	894	2586	2573	1671	787	928	835	2153	1375
289	C4_01980C	CLC1	292	TTACATCATTTCCTGTGGAG	0	-	217	no	-169	169	40	0	0	0	0	0	0	236	259	194	304	341	298	168	339	359	306	244	279	228	257	216	261	230	345	611	491	354	231	168	250	121	129	99	93	95	179	485	536
290	C4_03200C	C4_03200C	293	TATGTCCGTATCAATCTACG	0	-	275	no	-217	217	40	0	0	0	0	0	0	240	277	209	318	264	283	3	2	4	292	221	306	228	258	169	184	245	252	47	27	7	191	186	187	1532	1420	988	1768	1604	1986	524	524
291	C4_03200C	C4_03200C	294	TCATACCACGTAGATTGATA	0	+	283	no	-225	225	35	0	0	0	0	0	0	86	99	54	94	81	92	1	1	3	86	94	94	89	95	45	92	59	99	7	15	1	57	54	62	484	417	282	382	565	492	169	130
292	C4_03200C	C4_03200C	295	TCCGGAATGTCACAGGTAAT	0	-	225	no	-167	167	45	0	0	0	0	0	0	2599	2944	2505	3104	3549	3253	249	482	428	4446	3335	3838	2470	2937	1978	2682	2713	2863	288	161	161	2566	2161	2629	1837	1902	1180	2080	1594	1934	1453	1351
293	C4_03200C	C4_03200C	296	AGTAAACTCCGGAATGTCAC	0	-	218	no	-160	160	45	0	0	0	0	0	0	1607	1752	1426	1876	2165	2084	129	284	265	2320	1668	2003	1479	1726	1248	1636	1655	1887	200	113	81	1562	1159	1559	2531	2435	1514	2199	2064	2385	1785	1804
294	C4_03330W	IPK1	297	GTGAAGATCAGGCCCTTCCT	0	+	103	no	146	146	55	0	0	0	0	0	0	933	1141	905	1306	1505	1342	16	40	29	1313	927	1101	955	1045	719	966	1012	1098	144	131	86	941	716	851	1000	962	671	1029	1254	1331	16	4
[truncated: 258 more rows]
[truncated: 181 more columns]
